# Supplementary material for: Differential accumulation of phenolic compounds and expression of related genes in black- and yellow-seeded Brassica napus
Source: PubMed Central journal article supplement — J Exp Bot. 2013 May 22;64(10):2885–98. doi: 10.1093/jxb/ert148 (PMC3697950; doi:10.1093/jxb/ert148), 2013-05-22
Supplement: supp_ert148_jexbot099044_file001.pdf [file supp_ert148_jexbot099044_file001.pdf]

## 1. BnPAL

AtPAL (1) -----  
BnPAL1-1 (1) -----AACAACTCAAATTCCTTAAAACAACAAAAATAATAT  
BnPAL1-2 (1) -----AGGACCAAACCTCTAAAACAACAAAAATATATATTA  
BnPAL2-1 (1) AGGAACACAAAA-CCAAACTCCTTACCAACATTTCAA-AAGCTCTC--CTCTCTTTCA  
BnPAL2-2 (1) AGGAACACAAACTCCAAATCACCTCACCTACAATTCAAGAAGCTCTCTCTATCTCGCT  
BrPAL-1 (1) -----  
BrPAL-2 (1) -----  
BrPAL-3 (1) -----  
BrPAL-4 (1) -----  
BoPAL-1 (1) -----  
BoPAL-2 (1) -----  
BoPAL-3 (1) -----  
BjPAL (1) -----

AtPAL (1) -----  
BnPAL1-1 (37) AAAAGATCTCTCTAGCTATAATCTTCTCCTTTTAAATTTTAAATTCATAATCCCGATATTG  
BnPAL1-2 (39) GACATCTCTCACCTTAGAGATCCCTCCATAATCTCCTACATTTTAAATTAACCTCAATATCC  
BnPAL2-1 (56) TCCTTACCAACAATTCAAAGA-TCTGTTCC-TATTTATCAAACACTAAC-TCAAAAAC  
BnPAL2-2 (61) TCCTTACCTTTTAAATCAAAGAATCTGATCCCTATATATTAACAGAAAGGTCAAATAC  
BrPAL-1 (1) -----  
BrPAL-2 (1) -----  
BrPAL-3 (1) -----  
BrPAL-4 (1) -----  
BoPAL-1 (1) -----  
BoPAL-2 (1) -----  
BoPAL-3 (1) -----  
BjPAL (1) -----

AtPAL (1) --ATGGA---GATTAACGGGGCACACAAGCAACGGAGGAGGAGTGGACGCTATGTTAT  
BnPAL1-1 (97) TAATGGA---GGTTAACGGATTA--TCAC---ACGGAGGAGAAGTCGACGCTATGTTAT  
BnPAL1-2 (99) AAATGGA---GATTAACGGATCA--TCAT---ACA-----AAGTCGACGCTATGTTAT  
BnPAL2-1 (113) CAATGGATCAGATCAACGGATCAGTTCACCAAAACGGC--AAAA-CCGAAGCCATGTTGT  
BnPAL2-2 (121) CTATGGATCAGACTAACGGTTCAGTTCACCAGAACGGC--AAGA-TCGAAGCCATGTTGT  
BrPAL-1 (1) --ATGGA---GGTTAACGGATTA--TCAC---ACGGAGGAGAAGTCGACGCTATGTTAT  
BrPAL-2 (1) --ATGGA---GGTTAACGGATTA--TCAC---ACGGAGGAGAAGTCGACGCTATGTTAT  
BrPAL-3 (1) -----  
BrPAL-4 (1) --ATGGA---GGTTAACGGATTA--TCAC---ACGGAGGAGAAGTCGACGCTATGTTAT  
BoPAL-1 (1) --ATGGATCAGACTAACGGTTCAGTTCACCAGAACGGC--AAGA-TCGAAGCCATGTTGT  
BoPAL-2 (1) --ATGGA---GATTAACGGATCA--TCAT---ACA-----AAGTCGACGCTATGTTAT  
BoPAL-3 (1) --ATGGA---GGTTAACGGATTA--TCCC---ACGGAGGAGAAGTCGACGCTATGTTAT  
BjPAL (1) -----

AtPAL (56) ---GCGGCGGAGACATCAAGACAAGAACAATGGTGATCAACGCGGAGGATCCTCTCAACT  
BnPAL1-1 (148) ---GCGGCGGAGAGATCAAGAAGAATGCCACGGTGGTT---GGGGCTGATCCTCTCAACT  
BnPAL1-2 (144) ---GCGGCGGAGAGACCAAGAA---TGTCACGGTGGCT---GCGGCGGATCCTCTGAACT  
BnPAL2-1 (170) TGTGCGGCGGACTAGAGAAGACTAAAAGTGACGGTG-----GCGGCGGATCCGTTGAATT  
BnPAL2-2 (178) ---GCGGTGGAGTAGAGAAGACAAGAAGTGGCTGTG-----GCGGCGGATCCGTTGAACT  
BrPAL-1 (50) ---GCGGCGGAGAGATCAAGAAGAATGCCACGGTGGTT---GGGGCTGATCCTCTCAACT  
BrPAL-2 (50) ---GCGGCGGAGAGATCAAGAAGAATGCCACGGTGGTT---GGGGCTGATCCTCTCAACT  
BrPAL-3 (1) -----  
BrPAL-4 (50) ---GCGGCGGAGAGATCAAGAAGAATGCCACGGTGGTT---GGGGCTGATCCTCTCAACT  
BoPAL-1 (56) ---GCGGTGGAGTAGAGAAGACAAGAAGTGGCTGTG-----GCGGCGGATCCGTTGAACT  
BoPAL-2 (44) ---GCGGCGGAGAGACCAAGAA---TGTCACGGTGGCT---GCGGCGGATCCTCTGAACT  
BoPAL-3 (50) ---GCGACGGAGAGATCAAGAAGAATGCCACGGTGGTT---GGGGCTGATCCTCTCAACT  
BjPAL (1) -----

AtPAL (113) GGGGAGCTGCAGCGGAGCAAATGAAAGGTAGCCATTTGGATGAAGTGAAGAGAATGGTTG  
BnPAL1-1 (202) GGGGAGCTGCAGCGGAGCAAATGAAAGGGAGCCATTTGGATGAGGTGAAGAGAATGGTTGA  
BnPAL1-2 (195) GGGGAGCTGCAGCGGATCAAATGAAAGGGAGCCATTTGGATGAAGTGAAGAGAATGGTTA  
BnPAL2-1 (224) GGGGTGCTGCGGCGGAGCAGATGAAAGGGAGTCAATTTGGATGAGGTGAAGAGGATGGTTG  
BnPAL2-2 (229) GGGGTGCAGCAGCGGAACAGATGAAAGGGAGTCAATTTGGATGAGTTGAAGAGGATGGTTG

BrPAL-1 (104) GGGGAGCTGCAGCGGAGCAAATGAAAGGGAGCCATTTGGATGAGGTGAAGAGAATGGTGA  
 BrPAL-2 (104) GGGGAGCTGCAGCGGAGCAAATGAAAGGGAGCCATTTGGATGAGGTGAAGAGAATGGTGA  
 BrPAL-3 (1) -----  
 BrPAL-4 (104) GGGGAGCTGCAGCGGAGCAAATGAAAGGGAGCCATTTGGATGAGGTGAAGAGAATGGTGA  
 BoPAL-1 (107) GGGGTGCAGCAGCGGAGCAGATGAAAGGGAGTCACTTGGATGAGGTGAAGAGGATGGTTG  
 BoPAL-2 (95) GGGGAGCTGCGGCGGATCAAATGAAAGGGAGCCATTTGGATGAAGTGAAGAGAATGGTTA  
 BoPAL-3 (104) GGGGAGCTGCAGCGGAGCAAATGAAAGGGAGCCATTTGGATGAAGTGAAGAGAATGGTGA  
 BjpAL (1) -----  
  
 AtPAL (173) CTGAGTTTAGGAAGCCAGTGTGTAATCTTGGTGGTGAGACTCTGACCATTGGACAAGTGG  
 BnPAL1-1 (262) AGGAGTTTAGGAGGCCAGTGGTGAATCTCGGAGGCGAGACTCTCACGATCGGACAAGTGG  
 BnPAL1-2 (255) TGGAGTTTAGGAAGCCTGTGGTGAATCTCGGAGGAGAGACTCTGACGATCGGGCAAGTAG  
 BnPAL2-1 (284) AGGATTACCGTAAACCGGTGGTGAATCTCGGCGGAGAAAACACTGACGATCGGACAAGTGG  
 BnPAL2-2 (289) AGGAGTACCGCAGACCGGTGGTGAATCTCGGGGGAGAGACGCTAACAAATCGGACAAGTGG  
 BrPAL-1 (164) AGGAGTTTAGGAGGCCAGTGGTGAATCTCGGAGGCGAGACTCTCACGATCGGACAAGTGG  
 BrPAL-2 (164) AGGAGTTTAGGAGGCCAGTGGTGAATCTCGGAGGCGAGACTCTCACGATCGGACAAGTGG  
 BrPAL-3 (1) -----  
 BrPAL-4 (164) AGGAGTTTAGGAGGCCAGTGGTGAATCTCGGAGGCGAGACTCTCACGATCGGACAAGTGG  
 BoPAL-1 (167) AGGAGTACCGCAGACCCGTGGTGAATCTCGGGGGAGAGACGCTAACAAATCGGACAAGTGG  
 BoPAL-2 (155) TGGAGTTTAGGAAGCCTGTGGTGAATCTCGGAGGAGAGACTCTGACGATCGGGCAAGTAG  
 BoPAL-3 (164) AGGAGTTTAGGAGGCCAGTGGTGAATCTCGGAGGAGAGACTCTCACGATCGGACAAGTGG  
 BjpAL (1) -----GACAAGTGG  
  
 AtPAL (233) CTGCGATCTCAACTATTTGGTAACAGTGTGAAGGTGGAGCTATCGGAGACAGCTAGAGCCG  
 BnPAL1-1 (322) CAGCAATCTCGACCCCTTGGAAACGGTGTGAAGGTGGAGTTGTGCGGAGACGCGGAGAGCCG  
 BnPAL1-2 (315) CAGCGATCTCGACCCCTTGGAAATGGTGTGAAGGTGGAGCTGTGGAGACGCGCAAGAGCCG  
 BnPAL2-1 (344) CTGCGATCTCGAACGTAGGCGGTGGCGTTAAGGTTGAGCTAGCGGAGGCTTCAAGAGCCG  
 BnPAL2-2 (349) CGGCGATCTCCACCGCAGGCGGAGGTGTTAAGGTTGAGCTAGCGGAGGCTTCCGAGAGCTG  
 BrPAL-1 (224) CAGCAATCTCGACCCCTTGGAAACGGTGTGAAGGTGGAGTTGTGCGGAGACGCGGAGAGCCG  
 BrPAL-2 (224) CAGCAATCTCGACCCCTTGGAAACGGTGTGAAGGTGGAGTTGTGCGGAGACGCGGAGAGCCG  
 BrPAL-3 (1) -----  
 BrPAL-4 (224) CAGCAATCTCGACCCCTTGGAAACGGTGTGAAGGTGGAGTTGTGCGGAGACGCGGAGAGCCG  
 BoPAL-1 (227) CGGCGATCTCCACCGTAGGTGGAGGTGTTAAGGTTGAGCTAGCGGAGGCTTCCGAGAGCTG  
 BoPAL-2 (215) CAGCGATCTCGACCCCTTGGAAATGGTGTGAAGGTGGAGCTGTGCGGAGACGCGCAAGAGCCG  
 BoPAL-3 (224) CAGCAATCTCGACCCCTTGGAAACGGTGTGAAGGTGGAGTTGTGCGGAGACGCGGAGAGCCG  
 BjpAL (10) CAGCAATCTCGACCCCTTGGAAACGGTGTGAAGGTGGAGTTGTGCGGAGACGCGGAGAGCCG  
  
 AtPAL (293) GTGTGAATGCTAGTAGTATTGGGTTATGGAGAGTATGAACAAAGGCACTGATAGTTATG  
 BnPAL1-1 (382) GTGTGAAAGCGAGTAGTATTGGGTTATGGAGAGTATGGGCAAAGGAAACCGATAGTTATG  
 BnPAL1-2 (375) GTGTGAAAGCGAGCAGTATTGGGTTATGGAGAGTATGGGCAAAGGCACTGATAGTTATG  
 BnPAL2-1 (404) GCGTGAAAGCTAGCAGCAGTATTGGGTTATGGAAAGTATGGGCAAAGGTAAGTACTGACAGTTACG  
 BnPAL2-2 (409) GCGTGAAAGCTAGCAGTATTGGGTTATGGAAAGTATGGGCAAAGGTAAGTACTGACAGTTACG  
 BrPAL-1 (284) GTGTGAAAGCGAGTAGTATTGGGTTATGGAGAGTATGGGCAAAGGAAACCGATAGTTATG  
 BrPAL-2 (284) GTGTGAAAGCGAGTAGTATTGGGTTATGGAGAGTATGGGCAAAGGAAACCGATAGTTATG  
 BrPAL-3 (1) -----  
 BrPAL-4 (284) GTGTGAAAGCGAGTAGTATTGGGTTATGGAGAGTATGGGCAAAGGAAACCGATAGTTATG  
 BoPAL-1 (287) GCGTGAAAGCTAGCAGTATTGGGTTATGGAAAGTATGGGCAAAGGTAAGTACTGACAGTTACG  
 BoPAL-2 (275) GTGTGAAAGCGAGCAGTATTGGGTTATGGAGAGTATGGGCAAAGGCACTGATAGTTATG  
 BoPAL-3 (284) GTGTGAAAGCGAGTAGTATTGGGTTATGGAGAGTATGGGCAAAGGCAACCGATAGTTATG  
 BjpAL (70) GTGTGAAAGCGAGTAGTATTGGGTTATGGAGAGTATGGGCAAAGGAAACCGATAGTTATG  
  
 AtPAL (353) GTGTTACTACTGGTTTTGGTGCTACTTCTCATCGGAGAACCAAAAACGGGTGTCGCACTTC  
 BnPAL1-1 (442) GTGTTACTACTGGTTTTGGTGCTACTTCTCACCGGAGAACCAAGAACGGGTGTCGCTCTTC  
 BnPAL1-2 (435) GTGTTACAACCTGGTTTTGGTGCTACTTCTCATCGTAGAACCAAAAATGGCGTTCGCACTTC  
 BnPAL2-1 (464) GTGTAACCACCGGTTTTGGAGCTACTTCTCACCGGAGAACCAAAAACGGCACCGCTTTGC  
 BnPAL2-2 (469) GTGTCACCACCGGTTTTGGAGCGACTTCTCACCGGAGAACCAAAAACGGCACCGCATTGC  
 BrPAL-1 (344) GTGTTACTACTGGTTTTGGTGCTACTTCTCACCGGAGAACCAAGAACGGGTGTCGCTCTTC  
 BrPAL-2 (344) GTGTTACTACTGGTTTTGGTGCTACTTCTCACCGGAGAACCAAGAACGGGTGTCGCTCTTC  
 BrPAL-3 (1) -----  
 BrPAL-4 (344) GTGTTACTACTGGTTTTGGTGCTACTTCTCACCGGAGAACCAAGAACGGGTGTCGCTCTTC  
 BoPAL-1 (347) GTGTCACCGCCGGTTTTGGAGCGACTTCTCACCGGAGAACCAAAAACGGCACCGCATTGC  
 BoPAL-2 (335) GTGTTACTACTGGTTTTGGTGCTACTTCTCATCGTAGAACCAAAAATGGCGTTCGCACTTC  
 BoPAL-3 (344) GTGTTACTACTGGTTTTGGTGCTACTTCTCACCGGAGAACCAAGAACGGGTGTCGCTCTTC

BjPAL (130) GTGTTACTACTGGTTTTGGTGCTACTTCTCACCGGAGAACCAAGAACGGTGTGCTCTTC

AtPAL (413) AGAAGGAACCTATTAGATTCTTAACGCCGGAATATTCGGAAGCACGAAAGAAACAAGCC  
BnPAL1-1 (502) AGAAAGAGCTTATAAGATTTCTGAACGCCGGAATATTCGGCAGCACGAAGGAAACATCCC  
BnPAL1-2 (495) AGAAGGAGCTTATAAGATTTCTGAACGCCGGAATATTCGGCAGCACGAAAGAAACATGCC  
BnPAL2-1 (524) AAACCGAACTCATCAGGTTTTTGAACGCCGGAATATTCGGGAACACGAAGGAGACATGCC  
BnPAL2-2 (529) AAACCGAACTCATCAGATTTTTGAACGCCGGAATATTCGGTAACACGAAGGAGACATGCC  
BrPAL-1 (404) AGAAAGAGCTTATAAGATTTCTGAACGCCGGAATATTCGGCAGCACGAAGGAAACATCCC  
BrPAL-2 (404) AGAAAGAGCTTATAAGATTTCTGAACGCCGGAATATTCGGCAGCACGAAGGAAACATCCC  
BrPAL-3 (1) -----  
BrPAL-4 (404) AGAAAGAGCTTATAAGATTTCTGAACGCCGGAATATTCGGCAGCACGAAGGAAACATCCC  
BoPAL-1 (407) AAACCGAACTCATCAGATTTTTGAACGCCGGGATATTCGGTAACACGAAGGAGACATGCC  
BoPAL-2 (395) AGAAGGAGCTTATAAGATTTCTGAACGCCGGAATATTCGGCAGCACGAAAGAAACATGCC  
BoPAL-3 (404) AGAAAGAGCTTATAAGATTTCTGAACGCCGGAATATTCGGCAGCACGAAGGAAACATCCC  
BjPAL (190) AGAAAGAGCTTATAAGATTTCTGAACGCCGGAATATTCGGCAGCACGAAGGAAACATCCC

AtPAL (473) ACACATTGCCACACTCCGCCACAAGAGCCGCCATGCTTGTACGAATCAACACTCTCTCTCC  
BnPAL1-1 (562) ACACATTACCACACTCCGCCACAAGAGCCGCCATGCTCGTACGCATCAACACTCTCTCTCC  
BnPAL1-2 (555) ACACACTGCCACACTCCGCCACAAGAGCTGCCATGCTCGTACGCATAAACACTCTCTCTCC  
BnPAL2-1 (584) ACACGCTACCGGAATCCGCCACGAGAGCCGCCATGCTCGTCCGAGTCAACACTCTCTCTCC  
BnPAL2-2 (589) ACACGCTACCGGAATCCGCCACGAGAGCCGCCATGCTCGTCCGAGTCAACACTCTCTCTCC  
BrPAL-1 (464) ACACATTACCACACTCCGCCACAAGAGCCGCCATGCTCGTACGTATCAACACTCTCTCTCC  
BrPAL-2 (464) ACACATTACCACACTCCGCCACAAGAGCCGCCATGCTCGTACGTATCAACACTCTCTCTCC  
BrPAL-3 (1) -----  
BrPAL-4 (464) ACACATTACCACACTCCGCCACAAGAGCCGCCATGCTCGTACGTATCAACACTCTCTCTCC  
BoPAL-1 (467) ACACGCTACCGGAATCCGCCACGAGAGCCGCCATGCTCGTCCGAGTCAACACTCTCTCTCC  
BoPAL-2 (455) ACACACTGCCACACTCCGCCACAAGAGCTGCCATGCTCGTACGCATAAACACTCTCTCTCC  
BoPAL-3 (464) ACACATTACCACACTCCGCCACAAGAGCCGCCATGCTCGTACGCATCAACACCCTCTCTCC  
BjPAL (250) ACACATTACCACACTCCGCCACAAGAGCCGCCATGCTCGTACGTATCAACACTCTCTCTCC

AtPAL (533) AAGGATTTTCCGGTATCCGATTTGAGATTCTCGAAGCAATTACCAGTTTCTCAACAACA  
BnPAL1-1 (622) AAGGCTACTCAGGCATACGTTTTCGAGATCCTCGAGGCCATAACAAGTTTCTCAACAACA  
BnPAL1-2 (615) AAGGATACTCCGGCATCCGCTTCGAGATCCTCGAGGCCATAACCAGCTTCTCAACACCA  
BnPAL2-1 (644) AAGGATACTCCGGATCCGATTCGAAATCCTCGAAGCGATCACCAGCTTCTCAACCACA  
BnPAL2-2 (649) AAGGATACTCCGGATCCGATTCGAAATCCTCGAAGCGATCACCAGCTTCTCAACCACA  
BrPAL-1 (524) AAGGATACTCCGGCATACGTTTTCGAGATCCTCGAGGCCATAACAAGTTTCTCAACAACA  
BrPAL-2 (524) AAGGATACTCCGGCATACGTTTTCGAGATCCTCGAGGCCATAACAAGTTTCTCAACAACA  
BrPAL-3 (1) -----  
BrPAL-4 (524) AAGGATACTCCGGCATACGTTTTCGAGATCCTCGAGGCCATAACAAGTTTCTCAACAACA  
BoPAL-1 (527) AAGGATACTCCGGATCCGATTCGAAATCCTCGAAGCGATCACCAGCTTCTCAACCACA  
BoPAL-2 (515) AAGGATACTCCGGCATCCGCTTCGAGATCCTCGAGGCCATAACCAGCTTCTCAACACCA  
BoPAL-3 (524) AAGGCTACTCCGGCATACGTTTTCGAGATCCTCGAGGCCATAACAAGCTTCTCAACAGCA  
BjPAL (310) AAGGATACTCCGGCATACGTTTTCGAGATCCTCGAGGCCATAACAAGTTTCTCAACAACA

AtPAL (593) ACATCACTCCATCTCTCCCCCTCCGTGGTACAATCACCGCCTCCGGAGATCTCGTTCTCTC  
BnPAL1-1 (682) ACATCACTCCTTCACTCCCTCTCCGCGGCACCATCACCGCCTCCGGAGACCTCGTCCCCC  
BnPAL1-2 (675) ACATCACTCCTTCCCTCCCTCTCCGCGGCACCATCACCGCCTCCGGAGACCTCGTCCCCC  
BnPAL2-1 (704) ACATCTCTCCGTCTCTCCCCCTCCGTGGAACCATAACCGCCTCCGGCGATCTCGTCCCCC  
BnPAL2-2 (709) ACATCTCTCCATCTCTCCCCCTCCGTGGAACCATAACCGCCTCCGGCGATCTCGTCCCCC  
BrPAL-1 (584) ACATCACTCCTTCCCTCCCTCTCCGCGGCACCATCACCGCCTCCGGAGACCTCGTCCCCC  
BrPAL-2 (584) ACATCACTCCTTCCCTCCCTCTCCGCGGCACCATCACCGCCTCCGGAGACCTCGTCCCCC  
BrPAL-3 (1) -----  
BrPAL-4 (584) ACATCACTCCTTCCCTCCCTCTCCGCGGCACCATCACCGCCTCCGGAGACCTCGTCCCCC  
BoPAL-1 (587) ACATCTCTCCATCTCTCCCCCTCCGTGGAACCATAACCGCCTCCGGCGATCTCGTCCCCC  
BoPAL-2 (575) ACATCACTCCTTCCCTCCCTCTCCGCGGCACCATCACCGCCTCCGGAGACCTCGTCCCCC  
BoPAL-3 (584) ACATCACTCCTTCTCTCCCTCTCCGCGGCACCATCACCGCCTCCGGAGACCTCGTCCCCC  
BjPAL (370) ACATCACTCCTTCCCTCCCTCTCCGCGGCACCATCACCGCCTCCGGAGACCTCGTCCCCC

AtPAL (653) TCTCTACATCGCCGGACTTCTCACCGGTGCTCCCAATTCCAAAGCTACTGGTCCCAACG  
BnPAL1-1 (742) TCTCTACATCGCCGGACTTCTAACCGGACGTCCCAACTTCCAAAGCCACCGGTCCCAACG  
BnPAL1-2 (735) TCTCTACATCGCCGGCCTCTCACCGGCCGTCCCAACTTCCAAAGCCACCGGTCCCAACG  
BnPAL2-1 (764) TCTCTACATCGCCGGTCTCTCACCGGCCGTCCCAACTTCCAAAGCCACCGGTCCCAACG  
BnPAL2-2 (769) TCTCTACATCGCCGGCCTCTCACCGGCCGTCCGAACTTCCAAAGCCACAGGTCCCAACG

BrPAL-1 (644) TCTCCTACATCGCCGGACTCTTAACCGGACGTCCCAACTCCAAAGCCACCGGTCCCAACG  
 BrPAL-2 (644) TCTCCTACATCGCCGGACTCTTAACCGGACGTCCCAACTCCAAAGCCACCGGTCCCAACG  
 BrPAL-3 (1) -----  
 BrPAL-4 (644) TCTCCTACATCGCCGGACTCTTAACCGGACGTCCCAACTCCAAAGCCACCGGTCCCAACG  
 BoPAL-1 (647) TCTCCTACATCGCCGGCCTCCTCACC GGCCGTCCGAACTCCAAAGCCACAGGTCCCAACG  
 BoPAL-2 (635) TCTCCTACATCGCCGGCCTCCTCACC GGCCGTCCCAACTCCAAAGCCACCGGTCCCAACG  
 BoPAL-3 (644) TCTCCTACATCGCCGGACTCTTAACCGGACGTCCCAACTCCAAAGCCACCGGTCCCAACG  
 BjPAL (430) TCTCCTACATCGCCGGACTCTTAACCGGACGTCCCAACTCCAAAGCCACCGGTCCCAACG  
  
 AtPAL (713) GTGAAGCTTTAACAGCAGAGGAAGCTTTCAAATTAGCAGGAATCAGCTCCGGATTCTTTG  
 BnPAL1-1 (802) GCGAAGCCTTGAACGCAGAGGAAGCCTTCAAATGGCAGGAGTCACCTCCGGCTTCTTCG  
 BnPAL1-2 (795) GCGAAGCCTTGAACGCAGAGGAAGCCTTCAAGAAGCCGGAATCCCTCTGGGTTCTTTG  
 BnPAL2-1 (824) GCGAATCCCTAACCGCCGAGGAAGCCTTCAAGAAAGCGGGAATCACTTCCGGATTCTTCG  
 BnPAL2-2 (829) GCGAATCCCTAACCGCCGAGAGGCCCTTCAAACAAGCCGGAATCGCTTCCGGATTCTTCG  
 BrPAL-1 (704) GCGAAGCCCTAAACGCAGAGGAAGCCTTCAAATGGCTGGAGTCACCTCCGGCTTCTTCG  
 BrPAL-2 (704) GCGAAGCCCTAAACGCAGAGGAAGCCTTCAAATGGCTGGAGTCACCTCAGGCTTCTTTG  
 BrPAL-3 (1) -----  
 BrPAL-4 (704) GCGAAGCCCTAAACGCAGAGGAAGCCTTCAAATGGCTGGAGTCACCTCAGGCTTCTTTG  
 BoPAL-1 (707) GCGAATCCCTAACCGCCGAGAGGCCCTTCAAACAAGCCGGAATCGCTTCCGGATTCTTCG  
 BoPAL-2 (695) GCGAAGCCTTGAACGCAGAGGAAGCCTTCAAGAAGCCGGAATCCCTCTGGATTCTTTG  
 BoPAL-3 (704) GCGAAGCCTTGAACGCAGAGGAAGCCTTCAAATGGCAGGAGTCACCTCCGGCTTCTTCG  
 BjPAL (490) GCGAAGCCCTAAACGCAGAGGAAGCCTTCAAATGGCTGGAGTCACCTCAGGCTTCTTTG  
  
 AtPAL (773) ATCTCCAGCCTAAGGAAGGTCTCGCGCTAGTCAATGGCACGGCGGTGGATCTGGAATGG  
 BnPAL1-1 (862) ACCTCCAGCCTAAAGAAAGCCTCGCTCTAGTCAACGGCACGGCCGTGGCTCCGGCATGG  
 BnPAL1-2 (855) ACTTGCAGCCCAAGGAAGGTCTCGCCCTAGTCAACGGCACAGCCGTGGCTCCGGCATGG  
 BnPAL2-1 (884) ATCTACAGCCTAAGGAAGGCTTAGCGCTCGTCAACGGCACGGCGGTGGATCCGGCATGG  
 BnPAL2-2 (889) ATCTACAACCCAAGGAAGGCTTAGCGCTCGTCAACGGCACGGCGGTGGATCCGGCATGG  
 BrPAL-1 (764) ACCTCCAGCCTAAGGAAGGCTCGCCCTAGTCAACGGCACGGCCGTGGCTCCGGCATGG  
 BrPAL-2 (764) ACCTCCAGCCTAAGGAAGGCTCGCCCTAGTCAACGGCACGGCCGTGGCTCCGGCATGG  
 BrPAL-3 (1) -----  
 BrPAL-4 (764) ACCTCCAGCCTAAGGAAGGCTCGCCCTAGTCAACGGCACGGCCGTGGCTCCGGCATGG  
 BoPAL-1 (767) ATCTACAACCCAAGGAAGGCTTAGCACTCGTCAACGGCACGGCGGTGGATCCGGCATGG  
 BoPAL-2 (755) ACTTGCAGCCCAAGGAAGGTCTCGCCCTGGTCAACGGCACAGCCGTGGCTCCGGCATGG  
 BoPAL-3 (764) ATCTCCAGCCTAAGGAAGGCTCGCCCTAGTCAACGGCACGGCCGTGGCTCCGGCATGG  
 BjPAL (550) ACCTCCAGCCTAAGGAAGGCTCGCCCTAGTCAACGGCACGGCCGTGGCTCCGGCATGG  
  
 AtPAL (833) CGTCAATGGTGTTATTCGAACGAATGTTCTCTCTGTTTTGGCTGAGATTTTGTGCGCGG  
 BnPAL1-1 (922) CGTCGATGGTTCTCTTCGAAGCCAACGTCTCTCGTCTGGCCGAGGTTTTATCAGCCG  
 BnPAL1-2 (915) CCTCGATGGTTCTCTTCGAGACAAACGTCTCTCGGTTCTGGCCGAGGTTCTCTCAGCTG  
 BnPAL2-1 (944) CGTCGATGGTTCTCTTCGAAGCGAATGTTCAATCGGTCTCGCCGAGGTTTTATCCGCGA  
 BnPAL2-2 (949) CGTCGATGGTTCTATTCGAAGCGAAGCCTTCAATCGGTGTTAGCGGAGGTCTTATCCGCGA  
 BrPAL-1 (824) CGTCGATGGTTCTCTTCGAAGCCAACGTCTCTCGGTTCTGGCCGAGGTTTTATCAGCCG  
 BrPAL-2 (824) CGTCGATGGTTCTCTTCGAAGCCAACGTCTCTCGGTTCTGGCCGAGGTTTTATCAGCCG  
 BrPAL-3 (1) -----  
 BrPAL-4 (824) CGTCGATGGTTCTCTTCGAAGCCAACGTCTCTCGGTTCTGGCCGAGGTTTTATCAGCCG  
 BoPAL-1 (827) CGTCGATGGTTCTATTCGAAGCGAAGCCTTCAATCGGTGTTAGCGGAGGTCTTATCCGCGA  
 BoPAL-2 (815) CCTCGATGGTTCTCTTCGAGACAAACGTCTCTCGGTTCTGGCCGAGGTTCTCTCAGCTG  
 BoPAL-3 (824) CCTCGATGGTTCTCTTCGAAGCCAACGTCTCTCGGTTCTGGCCGAGGTTTTATCAGCCG  
 BjPAL (610) CGTCGATGGTTCTCTTCGAAGCCAACGTCTCTCGGTTCTGGCCGAGGTTTTATCAGCCG  
  
 AtPAL (893) TTTTCGCGAGGTGATGAGTGGAAGCCTGAGTTCACCGATCATCTCACTCACAGACTTA  
 BnPAL1-1 (982) TTTTCGCGGAGGTGATGAGCGGGAAGCCGGAGTTCACCGATCATTTGACTCACCGGTGA  
 BnPAL1-2 (975) TTTTCGCGGAGGTGATGAGCGGGAAGCCGGAGTTCACCGACCATTTAACCCACAGGTGA  
 BnPAL2-1 (1004) TTTTCGCGGAGGTGATGAGCGGGAAGCCGGAGTTCACCGATCATTTGACTCACCGACTCA  
 BnPAL2-2 (1009) TTTTCGCGGAGGTGATGAGCGGGAAGCCTGAGTTCACCGATCATCTAACGCACAGGTGA  
 BrPAL-1 (884) TTTTCGCGGAGGTGATGAGCGGGAAGCCGGAGTTCACCGATCATTTGACTCACCGGTGA  
 BrPAL-2 (884) TTTTCGCGGAGGTGATGAGCGGGAAGCCGGAGTTCACCGATCATTTGACTCACCGGTGA  
 BrPAL-3 (1) -----  
 BrPAL-4 (884) TTTTCGCGGAGGTGATGAGCGGGAAGCCGGAGTTCACCGATCATTTGACTCACCGGTGA  
 BoPAL-1 (887) TTTTCGCGGAGGTGATGAGCGGGAAGCCTGAGTTCACCGATCATCTAACGCACAGGTGA  
 BoPAL-2 (875) TTTTCGCGGAGGTGATGAGCGGGAAGCCGGAGTTCACCGACCATTTAACCCACAGGTGA  
 BoPAL-3 (884) TTTTCGCGGAGGTGATGAGCGGGAAGCCGGAGTTCACCGATCATTTAACTCACCGGTGA

BjPAL (670) TCTTCGCCGAGGTGATGAGCGGGAAGCCGGAGTTCACCGATCATTTGACTCACCGGCTGA

AtPAL (953) AACATCATCCCGGTCAAATCGAAGCGGGCGGCGATAATGGAGCATATCCTCGACGGGAAGCT  
BnPAL1-1 (1042) AGCACCACCCCGGGCAGATAGAAGCCGGCTATAATGGAACACATTCCTCGACGGGAGCT  
BnPAL1-2 (1035) AGCACCACCCCGGGCAGATAGAAGCCGGCGGATAATGGAGCACATCCTCGACGGGAGCT  
BnPAL2-1 (1064) AACACCACCCCGGACAAATCGAGGCGGGCGGCGATCATGGAGCACATCCTCGACGGGAAGCT  
BnPAL2-2 (1069) AGCACCACCCCGGGCAAATCGAAGCGGGCGGCGATCATGGAGCACATCCTCGACGGGAAGCT  
BrPAL-1 (944) AGCACCACCCCGGGCAGATAGAAGCCGGCTATAATGGAACACATTCCTCGACGGGAGCT  
BrPAL-2 (944) AGCACCACCCCGGGCAGATAGAAGCCGGCTATAATGGAACACATTCCTCGACGGGAGCT  
BrPAL-3 (1) -----  
BrPAL-4 (944) AGCACCACCCCGGGCAGATAGAAGCCGGCTATAATGGAACACATTCCTCGACGGGAGCT  
BoPAL-1 (947) AGCACCACCCCGGGCAAATCGAAGCGGGCGGCGATCATGGAGCACATCCTCGACGGGAAGCT  
BoPAL-2 (935) AGCACCACCCCGGGCAGATAGAAGCCGGCGGATAATGGAGCACATCCTCGACGGGAGCT  
BoPAL-3 (944) AGCACCACCCCGGGCAGATAGAAGCCGGCTATAATGGAACACATTCCTCGACGGGAGCT  
BjPAL (730) AGCACCACCCCGGGCAGATAGAAGCCGGCTATAATGGAACACATTCCTCGACGGGAGCT

AtPAL (1013) CGTACATGAAATTAGCTCAGAAGCTTCACGAGATGGATCCGTTACAGAAACCTAAACAAG  
BnPAL1-1 (1102) CGTACATGAAGCTAGCTCAGAAGCTTCACGAGATGGATCCGTTACAAAACCCAAACAAG  
BnPAL1-2 (1095) CGTACATGAAGCTAGCTCAGAAGCTTCACGAGATGGATCCGTTACAGAAACCTAAACAAG  
BnPAL2-1 (1124) CGTACATGAAGCTAGCGCAAAGCTTCACGAGATGGATCCGTTACAAAACCCGAAACAAG  
BnPAL2-2 (1129) CGTACATGAAGCTAGCGCAGAAGCTTCACGAGATGGATCCGTTACAAAAGCCGAAACAAG  
BrPAL-1 (1004) CGTACATGAAGCTAGCTCAGAAGCTTCACGAGATGGATCCGTTACAAAACCCAAACAAG  
BrPAL-2 (1004) CGTACATGAAGCTAGCTCAGAAGCTTCACGAGATGGATCCGTTACAAAACCCAAACAAG  
BrPAL-3 (1) ---ATGTTATGCG-GCGCAGAGA--TCAAGA-ATGTCACGGTGGCTGCGGCGGATCTCTCT  
BrPAL-4 (1004) CGTACATGAAGCTAGCTCAGAAGCTTCACGAGATGGATCCGTTACAAAACCCAAACAAG  
BoPAL-1 (1007) CGTACATGAAGCTAGCGCAGAAGCTTCACGAGATGGATCCGTTACAAAAGCCGAAACAAG  
BoPAL-2 (995) CGTACATGAAGCTAGCTCAGAAGCTTCACGAGATGGATCCGTTACAGAAACCTAAACAAG  
BoPAL-3 (1004) CGTACATGAAGCTAGCTCAGAAGCTTCACGAGATGGATCCGTTACAAAACCCAAACAAG  
BjPAL (790) CGTACATGAAGCTAGCTCAGAAGCTTCACGAGATGGATCCGTTACAAAACCCAAACAAG

AtPAL (1073) ATCGTTACGCTCTTCG-TACTTCTCCTCAATGGTTAGGTCCTCAAATCGAAGTGATCCGT  
BnPAL1-1 (1162) ACCGTTACGCTCTACG-TACCTCTCCCAATGGCTAGGTCCTCAGATAGAAGTGATCCGT  
BnPAL1-2 (1155) ACCGTTACGCGCTCCG-CACATCACCTCAATGGCTAGGTCCTCAGATAGAAGTGATCCGT  
BnPAL2-1 (1184) ACCGTTACGCGCTCCG-CACGTCCTCAGTGGCTCGGCCCTCAGATCGAAGTGATCCGT  
BnPAL2-2 (1189) ACCGTTACGCTCTCCG-TACCTCTCCTCAGTGGCTCGGCCCTCAGATCGAAGTGATCCGT  
BrPAL-1 (1064) ACCGTTACGCTCTACG-TACCTCTCCCAATGGCTAGGTCCTCAGATAGAAGTGATCCGT  
BrPAL-2 (1064) ACCGTTACGCTCTACG-TACCTCTCCCAATGGCTAGGTCCTCAGATAGAAGTGATCCGT  
BrPAL-3 (54) CAACTGGGGGGTGCAGGCGGAGCAAATGAAAGGGA--GCCATTTGGATGAAGTGAGAGA  
BrPAL-4 (1064) ACCGTTACGCTCTACG-TACCTCTCCCAATGGCTAGGTCCTCAGATAGAAGTGATCCGT  
BoPAL-1 (1067) ACCGTTACGCTCTCCG-TACCTCTCCTCAGTGGCTCGGTCCTCAGATCAAAGTGATCCGT  
BoPAL-2 (1055) ACCGTTACGCGCTCCG-CACATCACCTCAATGGCTAGGTCCTCAGATAGAAGTGATCCGT  
BoPAL-3 (1064) ACCGTTACGCGCTACG-TACCTCTCCTCAATGGCTAGGCCCTCAGGTAGAAGTGATCCGT  
BjPAL (850) ACCGTTACGCTCTACG-TACCTCTCCCAATGGCTAGGTCCTCAGATAGAAGTGATCCGT

AtPAL (1132) TACGCAACGAAATCGATCGAGCGTGAGATAAACTCCGTCAACGATAATCCGTTGATCGAT  
BnPAL1-1 (1221) TACGCGACCAAGTCCATCGAGCGTGAGATAAACTCCGTCAACGACAACCCTTTGATCGAT  
BnPAL1-2 (1214) TACGCCACCAAGTCCATCGAGCGTGAGATAAACTCCGTCAACGACAACCCTTTGATCGAC  
BnPAL2-1 (1243) CACGCCACGAAGTCAATCGAGCGTGAGATCAACTCCGTTAACGACAATCCGTTAATCGAC  
BnPAL2-2 (1248) CACGCAACGAAGTCGATCGAGCGTGAGATCAACTCCGTTAACGATAATCCGTTGATCGAT  
BrPAL-1 (1123) TACGCGACCAAGTCCATCGAGCGTGAGATAAACTCCGTCAACGACAACCCTTTGATCGAT  
BrPAL-2 (1123) TACGCGACCAAGTCCATCGAGCGTGAGATAAACTCCGTCAACGACAACCCTTTGATCGAT  
BrPAL-3 (112) ATGGTTATGGAGTTTAGGAAGCCTGTGGTGAATCTCGGAGGAGACTCTGACGATCGGA  
BrPAL-4 (1123) TACGCGACCAAGTCCATCGAGCGTGAGATAAACTCCGTCAACGACAACCCTTTGATCGAT  
BoPAL-1 (1126) CACGCCACGAAGTCGATCGAGCGTGAGATCAACTCCGTTAACGATAATCCGTTGATCGAT  
BoPAL-2 (1114) TACGCCACCAAGTCCATCGAGCGTGAGATAAACTCCGTCAACGACAACCCTTTGATCGAC  
BoPAL-3 (1123) TACGCGACCAAGTCCATCGAAGCTGAGATAAACTCCGTCAACGACAACCCTTTGATCGAC  
BjPAL (909) TACGCGACCAAGTCCATCGAGCGTGAGATAAACTCCGTCAACGACAACCCTTTGATCGAT

AtPAL (1192) GTTTCGAGGAACAAGCGATTACGGTGGTAACCTCC---AAGGAACACCAATCGGAGTT  
BnPAL1-1 (1281) GTCTCGAGAAATAAAGCCATTACGGTGGTAACCTCC---AGGGAACACCCATCGGTGTG  
BnPAL1-2 (1274) GTTTCAGAAACAAGCGATTACGGAGGTAACCTCC---AGGGGACACCCATCGGTGTG  
BnPAL2-1 (1303) GTTTCGAGGAACAAGCGATTACGGTGGTAACCTCC---AGGGGACTCCGATAGGAGTC  
BnPAL2-2 (1308) GTTTCAGAAACAAGCGATTACGGTGGTAACCTCC---AGGGGACTCCAATCGGAGTC

BrPAL-1 (1183) GTCTCGAGAAACAAAGCCATTACGGTGGTAACCTCC---AGGGAACACCCATCGGTGTG  
 BrPAL-2 (1183) GTCTCGAGAAACAAAGCCATTACGGTGGTAACCTCC---AGGGAACACCCATCGGTGTG  
 BrPAL-3 (172) ----CAAGTAGCAGCGATCTCGACCGTTGGAAATGGTGTGAAGGTGGAGCTGTCCGGAGAC  
 BrPAL-4 (1183) GTCTCGAGAAACAAAGCCATTACGGTGGTAACCTCC---AGGGAACACCCATCGGTGTG  
 BoPAL-1 (1186) GTTTCTAGAAACAAAGCGATTACGGTGGTAACCTCC---AGGGGACTCCGATCGGAGTC  
 BoPAL-2 (1174) GTTTCAAGAAACAAAGCGATTACGGAGGTAACCTCC---AGGGGACACCCATCGGTGTG  
 BoPAL-3 (1183) GTTTCTAGAAACAAAGCCATTACGGTGGTAACCTCC---AGGGAACACCCATCGGTGTG  
 BjpAL (969) GTCTCGAGAAACAAAGCCATTACGGTGGTAACCTCC---AGGGAACACCCATCGGTGTG

AtPAL (1249) TCAATGGATAACACGAGATTGGCGATAGCAGCGATTGGT--AAACTCATGTTTGCTCAAT  
 BnPAL1-1 (1338) TCTATGGACAACACACGTTTAGCTATCGCGGCCATAGGG--AAGCTCATGTTTCGCTCAGT  
 BnPAL1-2 (1331) TCCATGGACAACACGCTCTCGCTATAGCATCGATAGGG--AAGCTCATGTTTCGCTCAGT  
 BnPAL2-1 (1360) TCTATGGACAACACACGTTTAGCGGTTGAGCTATTGGG--AAGCTCATGTTTCGCTCAGT  
 BnPAL2-2 (1365) TCCATGGATAACACTCGTTTAGCGATTGCTTCGATAGGG--AAGCTCATGTTTCGCTCAAT  
 BrPAL-1 (1240) TCTATGGACAACACACGTTTAGCTATCGCGGCCATAGGG--AAGCTCATGTTTCGCTCAGT  
 BrPAL-2 (1240) TCTATGGACAACACACGTTTAGCTATCGCGGCCATAGGG--AAGCTCATGTTTCGCTCAGT  
 BrPAL-3 (228) GGCA---AGAGCCGGTGTGAAG-GCAGCAGTGATTGGGTGATGGAGATGGGCAAAAG  
 BrPAL-4 (1240) TCTATGGACAACACACGTTTAGCTATCGCGGCCATAGGG--AAGCTCATGTTTCGCTCAGT  
 BoPAL-1 (1243) TCGATGGATAAACACTCGTTTAGCGATTGCTTCGATAGGG--AAGCTCATGTTTCGCTCAAT  
 BoPAL-2 (1231) TCCATGGACAACACGCTCTCGCTATAGCATCGATAGGG--AAGCTCATGTTTCGCTCAGT  
 BoPAL-3 (1240) TCGATGGACAACACACGTTTAGCTATAGCAGCGATAGGG--AAGCTCATGTTTCGCTCAGT  
 BjpAL (1026) TCTATGGACAACACACGTTTAGCTATCGCGGCCATAGGG--AAGCTCATGTTTCGCTCAGT

AtPAL (1307) TCTCAGAGCTTGTGAATGATTTCTACAACAATGGTTTACCCTCGAATCTAACCGCTTCGA  
 BnPAL1-1 (1396) TCTCCGAGCTGGTCAACGATTATTACAACAACGGTCTTCCTTCGAACCTAACCGCTTCGA  
 BnPAL1-2 (1389) TCTCCGAGCTTGTTAACGACTTCTACAACAACGGTCTTCCTTCTAACCTAACCGCTTCGA  
 BnPAL2-1 (1418) TCTCGAGCTTGTTAACGACTTCTACAACAACGGTCTTCCTTCGAATCTAACCGCTTCCA  
 BnPAL2-2 (1423) TCTCGAGCTTGTTAACGATTCTACAACAACGGTCTTCCTTCGAATCTAACCGCTTCGA  
 BrPAL-1 (1298) TCTCCGAGCTGGTCAACGATTATTACAACAACGGTCTTCCTTCGAACCTAACCGCTTCGA  
 BrPAL-2 (1298) TCTCCGAGCTGGTCAACGATTATTACAACAACGGTCTTCCTTCGAACCTAACCGCTTCGA  
 BrPAL-3 (284) GCACTGA--TAGTTATGG--TGTTACTAC--TGGTTTGGTGCCTACTT---CTCATCGT  
 BrPAL-4 (1298) TCTCCGAGCTGGTCAACGATTATTACAACAACGGTCTTCCTTCGAACCTAACCGCTTCGA  
 BoPAL-1 (1301) TCTCGAGCTTGTTAACGATTCTACAACAATGGACTTCCTTCGAATCTAACCGCTTCGA  
 BoPAL-2 (1289) TCTCCGAGCTTGTTAACGACTTCTACAACAACGGTCTTCCTTCTAACCTAACCGCTTCGA  
 BoPAL-3 (1298) TCTCCGAGCTGGTCAACGATTATTACAACAACGGTCTTCCTTCGAACCTAACCTGCTTCGA  
 BjpAL (1084) TCTCCGAGCTGGTCAACGATTATTACAACAACGGTCTTCCTTCGAACCTAACCGCTTCGA

AtPAL (1367) GGAATCCAAGTTTGGATTATGGATTCA-AGGGAGCTGAGATTGCAATGGCTTCTTATTGT  
 BnPAL1-1 (1456) GGAACCTAGTTTGGACTACGGTTTCA-AAGGAGCGGAGATCGCGATGGCTTTCGTAAGT  
 BnPAL1-2 (1449) GGAACCTAGTTTGGACTACGGTTTCA-AAGGAGCGGAGATCGCTATGGCTTTCGTAAGT  
 BnPAL2-1 (1478) ACAACCAAGCTTGGATTATGGATTCA-AAGGAGCGGAGATCGCTATGGCTTTCGTAAGT  
 BnPAL2-2 (1483) ACAATCCAAGCTTGGATTACGGATTCA-AAGGAGCTGAGGTCGCTATGGCTTTCGTAAGT  
 BrPAL-1 (1358) GGAACCTAGTTTGGACTACGGTTTCA-AAGGAGCGGAGATCGCGATGGCTTTCGTAAGT  
 BrPAL-2 (1358) GGAACCTAGTTTGGACTACGGTTTCA-AAGGAGCGGAGATCGCGATGGCTTTCGTAAGT  
 BrPAL-3 (334) AGAA-CCAAAATGGCGTTCGACTTTCAGAAAGGAGCTTA-----TAAGATTCCTGAACGC  
 BrPAL-4 (1358) GGAACCTAGTTTGGACTACGGTTTCA-AAGGAGCGGAGATCGCGATGGCTTTCGTAAGT  
 BoPAL-1 (1361) ACAATCCAAGTTTGGATTATGGATTCA-AAGGAGCTGAGATCGCTATGGCTTTCGTAAGT  
 BoPAL-2 (1349) GGAACCTAGTTTGGACTACGGTTTCA-AAGGAGCGGAGATCGCTATGGCTTTCGTAAGT  
 BoPAL-3 (1358) GGAACCTAGTTTGGACTACGGTTTCA-AAGGAGCGGAGATCGCGATGGCTTTCGTAAGT  
 BjpAL (1144) GGAACCTAGTTTGGACTACGGTTTCA-AAGGAGCGGAGATCGCGATGGCTTTCGTAAGT

AtPAL (1426) TCAGAGCTTCAATACTTAGCTAATCCTGTGACTAGCCATGTTCAATCAGCAGAGCAACAT  
 BnPAL1-1 (1515) TCAGAGCTTCAATACTTAGCTAATCCTGTGACTAGCCATGTTCAATCAGCAGAGCAACAC  
 BnPAL1-2 (1508) TCAGAGCTTCAATACTTAGCTAATCCTGTGACTAGCCATGTTCAATCAGCAGAGCAACAC  
 BnPAL2-1 (1537) TCTGAGCTTCAATACTTAGCTAATCCTGTGACTAGCCATGTTCAATCAGCAGAGCAACAT  
 BnPAL2-2 (1542) TCTGAGCTTCAATACTTAGCTAATCCTGTGACTAGCCATGTTCAATCAGCAGAGCAACAT  
 BrPAL-1 (1417) TCAGAGCTTCAATACTTAGCTAATCCTGTGACTAGCCATGTTCAATCAGCAGAGCAACAC  
 BrPAL-2 (1417) TCAGAGCTTCAATACTTAGCTAATCCTGTGACTAGCCATGTTCAATCAGCAGAGCAACAC  
 BrPAL-3 (387) CGGAATATTCGGCAGC--ACGAA---AGAAACATGCCACACACTACCAC-----A-CTC  
 BrPAL-4 (1417) TCAGAGCTTCAATACTTAGCTAATCCTGTGACTAGCCATGTTCAATCAGCAGAGCAACAC  
 BoPAL-1 (1420) TCTGAGCTTCAATACTTAGCTAATCCTGTGACTAGCCATGTTCAATCAGCAGAGCAACAT  
 BoPAL-2 (1408) TCAGAGCTTCAATACTTAGCTAATCCTGTGACTAGCCATGTTCAATCAGCAGAGCAACAC  
 BoPAL-3 (1417) TCAGAGCTTCAATACTTAGCTAATCCTGTGACTAGCCATGTTCAATCAGCAGAGCAACAT

BjPAL (1203) TCAGAGCTTCAGTACTTGGCCAACCCCGTGACTAGCCATGTTCAATCAGCTGAGCAACAC  
  
 AtPAL (1486) AACCAAGATGTCAACTCTTTGGGACTAATCTCGTCTCGCAAAACTTCTGAAGCTGTTGAT  
 BnPAL1-1 (1575) AACCAAGACGTGAACCTTTTAGGACTAATCTCATCTCGCAAGACATCAGAAGCTGTAGAC  
 BnPAL1-2 (1568) AACCAAGACGTGAACCTTTTAGGACTAATCTCATCACGGAAGACGGCAGAAGCTGTCGAC  
 BnPAL2-1 (1597) AACCAAGATGTAACTCTTTTAGGACTCATCTCGTCTCGTAAGACGTCAGAAGCTGTTGAC  
 BnPAL2-2 (1602) AACCAAGATGTGAACCTTTGGGACTCATCTCGTCTCGCAAAACGTCAGAAGCTGTTGAC  
 BrPAL-1 (1477) AACCAAGACGTGAACCTTTTAGGACTAATCTCATCTCGCAAGACATCAGAAGCTGTAGAC  
 BrPAL-2 (1477) AACCAAGACGTGAACCTTTTAGGACTAATCTCATCTCGCAAGACATCAGAAGCTGTAGAC  
 BrPAL-3 (435) CGCCACGA---G-----AGCCGCATGCTCTCTCGCAAGACGGCAGAAGCTGTTGAC  
 BrPAL-4 (1477) AACCAAGACGTGAACCTTTTAGGACTAATCTCATCTCGCAAGACATCAGAAGCTGTAGAC  
 BoPAL-1 (1480) AACCAAGATGTAACTCTTTGGGACTAATCTCGTCTCGCAAAACGTCAGAAGCTGTTGAC  
 BoPAL-2 (1468) AACCAAGACGTGAACCTTTTAGGACTAATCTCATCACGCAAGACGGCAGAAGCTGTCGAC  
 BoPAL-3 (1477) AACCAAGACGTGAACCTTTTAGGACTAATCTCGTCTCGCAAGACGGCAGAAGCTGTCGAC  
 BjPAL (1263) AACCAAGACGCGAACTCTTTTAGGACTAATCTCATCTCGCAAGACATCAGAAGCTGTAGAC  
  
 AtPAL (1546) ATTCTCAAGCTTATGTCAACAACGTTCCCTCGTTGCGATTGTTCAAGCTGTGGATTTGAGA  
 BnPAL1-1 (1635) ATACTCAAACCTCATGTCGACAACGTTCCCTGTCGGAATCTGCCAAGCCATCGATCTAAGA  
 BnPAL1-2 (1628) ATACTCAAACCTCATGTCGACAACGTTCCCTGTCGGAATCTGCCAAGCTGTGGATCTAAGA  
 BnPAL2-1 (1657) ATTCTCAAGCTCATGTCACAACGTTCCCTCGTAGCGATTGTTCAAGCTGTTGATTTGAGA  
 BnPAL2-2 (1662) ATCTCAAGCTTATGTCGGCAACGTTCCCTGTTGGTATATGCAAGCTGTTGATTTGAGA  
 BrPAL-1 (1537) ATACTCAAACCTCATGTCGACAACGTTCCCTGTCGGAATCTGCCAAGCCATCGATCTACGA  
 BrPAL-2 (1537) ATACTCAAACCTCATGTCGACAACGTTCCCTGTCGGAATCTGCCAAGCCATCGATCTAAGA  
 BrPAL-3 (484) ATTCTCAAACCTCATGTCGACAACGTTCCCTGTCGGAATCTGCCAAGCTGTAGATCTAAGA  
 BrPAL-4 (1537) ATACTCAAACCTCATGTCGACAACGTTCCCTGTCGGAATCTGCCAAGCCATCGATCTAAGA  
 BoPAL-1 (1540) ATCTCAAGCTGATGTCGCAACGTTCCCTGTTGCTATATGCAAGCTGTTGATTTGAGA  
 BoPAL-2 (1528) ATACTCAAACCTCATGTCGACAACGTTCCCTGTCGGAATCTGCCAAGCTGTGGATCTAAGA  
 BoPAL-3 (1537) ATACTCAAACCTCATGTCGACAACGTTCCCTGTCGGAATCTGCCAAGCCATCGATCTACGA  
 BjPAL (1323) ATACTCAAACCTCATGTCGACAACGTTCCCTGTCGGAATCTGCCAAGCCATCGATCTAAGA  
  
 AtPAL (1606) CATTGAGGAGAATTTGAGACAGACTGTGAAGAACACTGTCTCTCAAGTGGCGAAGAAA  
 BnPAL1-1 (1695) CACTTGGAGGAGAATCTAAAACAAACCGTCAAGAACACAGTCTCTCAAGTGGCCAAGAAA  
 BnPAL1-2 (1688) CACTTGGAGGAGAATCTAAAACAAACCGTGAAGAACACTGTCTCTCAAGTGGCCAAGAAA  
 BnPAL2-1 (1717) CATCTCGAGGAGAATCTGAGACAGACCGTGAAGAACACGGTTTCTCAAGTGGCGAAGAAA  
 BnPAL2-2 (1722) CATCTGAGGAGAATCTGAGACAAACCGTGAAGAACACAGTTTCTCAAGTGGCGAAGAAA  
 BrPAL-1 (1597) CACTTGGAGGAGAATCTAAAACAAACCGTCAAGAACACAGTCTCTCAAGTGGCCAAGAAA  
 BrPAL-2 (1597) CACTTGGAGGAGAATCTAAAACAAACCGTCAAGAACACAGTCTCTCAAGTGGCCAAGAAA  
 BrPAL-3 (544) CACTTGGAGGAGAATCTAAAACAAACCGTGAAGAACACGGTCTCTCAAGTGGCTAAGAAA  
 BrPAL-4 (1597) CACTTGGAGGAGAATCTAAAACAAACCGTCAAGAACACAGTCTCTCAAGTGGCCAAGAAA  
 BoPAL-1 (1600) CATCTGAGGAGAATCTGAGACAAACCGTGAAGAACACAGTTTCTCAAGTGGCGAAGAAA  
 BoPAL-2 (1588) CACTTGGAGGAGAATCTAAAACAAACCGTGAAGAACACTGTCTCTCAAGTGGCCAAGAAA  
 BoPAL-3 (1597) CACTTGGAGGAGAATCTAAAACAAACCGTCAAGAACACAGTCTCTCAAGTGGCCAAGAAA  
 BjPAL (1383) CACTTGGAGGAGAATCTAAAACAAACCGTCAAGAACACAGTCTCTCAAGTGGCCAAGAAA  
  
 AtPAL (1666) GTTCTTACTACTGGAGTCAATGGTGAGCTTCACTCTCTCGCTTCTGCGAAAAGGATTTA  
 BnPAL1-1 (1755) GTTCTCACCACCTGGAGTCAACGGTGAGCTTCAACCCATCACGCTTCTGCGAGAAAGACTTA  
 BnPAL1-2 (1748) GTTCTAACCACCTGGAGTCAACGGTGAGCTTCAACCCATCTCGCTTCTGCGAGAAAGACTTA  
 BnPAL2-1 (1777) GTGTTGACTACTGGAGTCAACGGGGAGTTGCATCCATCGCGGTTCTGTGAGAAAGACTTG  
 BnPAL2-2 (1782) GTTTTAACCACCTGGAGTCTACGGTGAGCTGCATCCGTCGCGGTTCTGCGAGAAGGACTTG  
 BrPAL-1 (1657) GTTCTCACCACCTGGAGTCAACGGTGAGCTTCAACCCATCACGCTTCTGCGAGAAAGACTTA  
 BrPAL-2 (1657) GTTCTCACCACCTGGAGTCAACGGTGAGCTTCAACCCATCACGCTTCTGCGAGAAAGACTTA  
 BrPAL-3 (604) GTTCTAACCACCTGGAGTCAACGGTGAGCTTCAACCCATCTCGCTTCTGCGAGAAAGACTTTA  
 BrPAL-4 (1657) GTTCTCACCACCTGGAGTCAACGGTGAGCTTCAACCCATCACGCTTCTGCGAGAAAGACTTTA  
 BoPAL-1 (1660) GTGCTAACCACCTGGAGTCAACGGTGAGCTGCATCCGTCGCGGTTCTGCGAGAAGGACTTG  
 BoPAL-2 (1648) GTTCTAACCACCTGGAGTCAACGGTGAGCTTCAACCCATCTCGCTTCTGCGAGAAAGACTTTA  
 BoPAL-3 (1657) GTTCTCACCACCTGGAGTCAACGGTGAGCTTCAACCCATCACGCTTCTGCGAGAAAGACTTTA  
 BjPAL (1443) GTTCTCACCACCTGGAGTCAACGGTGAGCTTCAACCCATCACGCTTCTGCGAGAAAGACTTTA  
  
 AtPAL (1726) CTCAAAAGTGTAGACCGTGAAACAAGTCTACACATACGCGGATGATCCTTGTAGCGCAACG  
 BnPAL1-1 (1815) CTCAAAAGTCGTGACCGTGAGCAAGTCTACACGTACGCGGACGACCCATGCAGCGCCACG  
 BnPAL1-2 (1808) CTCAAAATCGTTGACCGTGAAACAAGTCTACACGTACGCGGACGATCCATGCAGCGCCACG  
 BnPAL2-1 (1837) CTTAAGGTCGTTGATCGTGAAACAAGTGTTCACATACGTTGACGATCCTTGTAGCGCTACG  
 BnPAL2-2 (1842) CTTAAGGTCGTTGATCGCGAGCAAGTGTTCACGTACGTTGATGATCCTTGTAGCGCTACG

BrPAL-1 (1717) CTCAAAGTCGTCGACCGTGAGCAAGTCTACACGTACGCGGACGACCCATGCAGCGCCACG  
 BrPAL-2 (1717) CTCAAAGTCGTCGACCGTGAGCAAGTCTACACGTACGCGGACGACCCATGCAGCGCCACG  
 BrPAL-3 (664) CTCAAAGTCGTTGACCGTGAAACAAGTCTACACGTACGCGGACGATCCATGCAGCGCCACG  
 BrPAL-4 (1717) CTCAAAGTCGTCGACCGTGAGCAAGTCTACACGTACGCGGACGACCCATGCAGCGCCACG  
 BoPAL-1 (1720) CTTAAGGTCGTTGATCGCGAGCAAGTGTTCACGTACGTGGATGATCCTTGTAGCGCTACG  
 BoPAL-2 (1708) CTCAAAGTCGTTGACCGTGAAACAAGTCTACACGTACGCGGACGATCCATGCAGCGCCACG  
 BoPAL-3 (1717) CTCAAAGTCGTCGACCGTGAGCAAGTCTACACGTACGCGGACGACCCATGCAGCGCCACG  
 BjpAL (1503) CTCAAAGTCGTCGACCGTGAGCAAGTCTACACGTACGCGGACGACCCATGCAGCGCCACG

AtPAL (1786) TACCCGTTGATTCCAGAAGCTGAGACAAGTTATTGTTGACCATGCTTTGATCAATGGTGAG  
 BnPAL1-1 (1875) TACCCGTTGATCCAGAAGCTGAGGCAAGTCATCGTTGACCATGCTTTGGTCAACGGTGAG  
 BnPAL1-2 (1868) TACCCGTTGATCCAGAAGCTAAGGCAAGTTATCGTTGACCATGCTTTGGTCAACGGTGAG  
 BnPAL2-1 (1897) TACCCATTGATGCAGAACTAAGACAAGTTATCGTTGATCACGCGTTATCCAATGGTGAG  
 BnPAL2-2 (1902) TACCCGTTGATGCAGAACTGAGACAAGTTATTGTTGATCATGCTTTGTCTAACGGTGAG  
 BrPAL-1 (1777) TACCCGTTGATCCAGAAGCTGAGGCAAGTCATCGTTGACCATGCTTTGGTCAACGGTGAG  
 BrPAL-2 (1777) TACCCGTTGATCCAGAAGCTGAGGCAAGTCATCGTTGACCATGCTTTGGTCAACGGTGAG  
 BrPAL-3 (724) TACCCGTTGATCCAGAAGCTAAGGCAAGTTATCGTTGACCATGCTTTGGTCAACGGTGAG  
 BrPAL-4 (1777) TACCCGTTGATCCAGAAGCTGAGGCAAGTCATCGTTGACCATGCTTTGGTCAACGGTGAG  
 BoPAL-1 (1780) TACCCGTTGATGCAGAACTGAGACAAGTTATTGTTGATCATGCTTTGTCTAACGGTGAG  
 BoPAL-2 (1768) TACCCGTTGATCCAGAAGCTAAGGCAAGTTATCGTTGACCATGCTTTGGTCAACGGTGAG  
 BoPAL-3 (1777) TACCCGCTGATTCCAGAAGCTGAGGCAAGTCATCGTTGACCATGCTTTGGTCAACGGTGAG  
 BjpAL (1563) TACCCGTTGATCCAGAAGCTGAGGCAAGTCATCGTTGACCATGCTTTGGTCAACGGTGAG

AtPAL (1846) AGTGAGAAGAATGCAGTGACTTCAATCTTCCATAAGATTGGAGCTTTCGAGGAGGAGCTT  
 BnPAL1-1 (1935) AGCGAGAAGAATGCAATGACTTCCGATCTTCCATAAGATTGGAGCTTTCGAGGAGGAGCTC  
 BnPAL1-2 (1928) AGCGAGAAGAACGCTATGACTTCGATCTTCCACAAGATTGGTGCTTTCGGGGAGGAGCTC  
 BnPAL2-1 (1957) ACTGAGAAGAACGCAGTGACTTCCGATCTTCCAAAAGATTGGAGCTTTCGAGGAGGAGCTT  
 BnPAL2-2 (1962) ACTGAGAAGAACGCAGTGACTTCCGATCTTCCAAAAGATCGGAGCTTTCGAGGAAGAGCTC  
 BrPAL-1 (1837) AGCGAGAAGAATGCAATGACTTCCGATCTTCCATAAGATTGGAGCTTTCGAGGAGGAGCTC  
 BrPAL-2 (1837) AGCGAGAAGAATGCAATGACTTCCGATCTTCCATAAGATTGGAGCTTTCGAGGAGGAGCTC  
 BrPAL-3 (784) AGCGAGAAGAACGCTATGACTTCGATCTTCCACAAGATTGGTGCTTTCGAGGAGGAGCTC  
 BrPAL-4 (1837) AGCGAGAAGAATGCAATGACTTCCGATCTTCCATAAGATTGGAGCTTTCGAGGAGGAGCTC  
 BoPAL-1 (1840) ACTGAGAAGAACGCAGTGACTTCCGATCTTCCAAAAGATCGGAGCTTTCGAGGAAGAGCTC  
 BoPAL-2 (1828) AGCGAGAAGAACGCTATGACTTCCGATCTTCCACAAGATTGGTGCTTTCGAGGAGGAGCTC  
 BoPAL-3 (1837) AGCGAGAAGAATGCGATGACTTCCGATCTTCCATAAGATTGGGGCTTTCGAGGAGGAGCTC  
 BjpAL (1623) AGCGAGAAGAATGCAATGACTTCCGATCTTCCATAAGATTGGAGCTTTCGAGGAGGAGCTC

AtPAL (1906) AAGGCGGTGCTACCTAAAGAAGTGGAGGCAGCTAGAGCGGCGTATGATAACGGAACAGCT  
 BnPAL1-1 (1995) AAGGCGGTGCTACCTAAAGAAGTGGAGGCAGCTAGAGCGGCGTATGATAACGGAACAGCT  
 BnPAL1-2 (1988) AAGGCGGTGCTTCCCTGACGAAGTGGAGGCAGCTAGAGCGGCGTATGATAACGGGACATCT  
 BnPAL2-1 (2017) AAGATGGTGCTTCCCTAAGGAAGTGGATGCGACTAGAGAGGCTTACGGTAATGGAACGGCG  
 BnPAL2-2 (2022) AAGATGGTGCTCCCTAAAGAAGTGGATGCGGCTAGAGAGGCTTACGGTAACGGAACGGCG  
 BrPAL-1 (1897) AAGGCGGTGCTACCTAAAGAAGTGGAGGCAGCTAGAGCGGCGTATGATAACGGAACAGCT  
 BrPAL-2 (1897) AAGGCGGTGCTACCTAAAGAAGTGGAGGCAGCTAGAGCGGCGTATGATAACGGAACAGCT  
 BrPAL-3 (844) AAGGCGGTGCTTCCCTGATGAAGTGGAGGCAGCTAGAGTGGCGTACGATAACGGGACATCT  
 BrPAL-4 (1897) AAGGCGGTGCTACCTAAAGAAGTGGAGGCAGCTAGAGCGGCGTATGATAACGGAACAGCT  
 BoPAL-1 (1900) AAGATGGTGCTCCCTAAAGAAGTGGATGCGGCTAGAGAGGCTTACGGTAACGGAACGGCG  
 BoPAL-2 (1888) AAGGCGGTGCTTCCCTGACGAAGTGGAGGCAGCTAGAGTGGCGTATGATAACGGGACATCT  
 BoPAL-3 (1897) AAGGCGGTGCTACCTAAAGAAGTGGAGGCAGCTAGAGCGGCGTATGATAACGGAACAGCT  
 BjpAL (1683) AAGGCGGTGCTACCTAAAGAAGTGGAGGCAGCTAGAGCGGCGTATGATAACGGAACAGCT

AtPAL (1966) GCTATCCGAACAGGATCAAGGAATGTAGGTCGTATCCATTGTATAGATTTCGTGAGGGAA  
 BnPAL1-1 (2055) GCGATACCGAACAGGATCAAGGAGTGTAGGTCGTATCCTTTGTATAGGTTTGTGAGGGAG  
 BnPAL1-2 (2048) GCTATACCGAACAGGATCAAGGAGTGTAGGTCGTATCCTTTGTATAGGTTTCGTGAGGGAG  
 BnPAL2-1 (2077) GCGATTCCGAACAGGATTAAGGAATGTCGGTCTTATCCATTATATAAGTTTGTGAGGGAA  
 BnPAL2-2 (2082) GCGATTCCGAACAGGATTAAGGAATGTCGGTCTTACCCGTTGTATAAGTTTCGTGAGGGAA  
 BrPAL-1 (1957) GCGATACCGAACAGGATCAAGGAGTGTAGGTCGTATCCTTTGTATAGGTTTGTGAGGGAG  
 BrPAL-2 (1957) GCGATACCGAACAGGATCAAGGAGTGTAGGTCGTATCCTTTGTATAGGTTTGTGAGGGAG  
 BrPAL-3 (904) GCTATACCGAACAGGATCAAGGAGTGTAGGTCGTATCCTTTGTATAGGTTTCGTGAGGGAG  
 BrPAL-4 (1957) GCGATACCGAACAGGATCAAGGAGTGTAGGTCGTATCCTTTGTATAGGTTTGTGAGGGAG  
 BoPAL-1 (1960) GCGATTCCGAACAGGATTAAGGAATGTCGGTCTTACCCGTTGTATAAGTTTCGTGAGGGAA  
 BoPAL-2 (1948) GCTATACCGAACAGGATCAAGGAGTGTAGGTCGTATCCTTTGTATAGGTTTCGTGAGGGAG  
 BoPAL-3 (1957) GCGATACCGAACAGGATCAAGGAGTGTAGGTCGTATCCTTTGTATAGGTTTGTGAGGGAG



BjPAL (1743) GCGATACCGAACAGGATCAAGGAGTGTAGGTCTGATCCTTTGTATAGTTTGTGAGGGAG

AtPAL (2026) GAGCTTGGAAACAGAGCTTTTGACCGGAGAGAAAAGTGACGTCGCCTGGAGAAGAGTTTCGAC  
BnPAL1-1 (2115) GAGCTTGGAAACAGAGCTTTTGACCGGAGAGAAAAGCGACGTCGCCCGGAGAAGAGTTTGAT  
BnPAL1-2 (2108) GAGCTTGGAACTGAGCTTTTGACCGGAGAGAAAAGTGACGTCGCCCGGAGAAGAGTTTGAT  
BnPAL2-1 (2137) GAGCTCGGGACGAAGTTGCTGACCGGAGAGAAAAGTTGTCTCTCCGGGAGAGGAGTTTGAT  
BnPAL2-2 (2142) GAGCTTGGAAACGAAGCTGTTGACCGGAGAGAAAAGTTGTGTCTCCGGGAGAGGAGTTTGAT  
BrPAL-1 (2017) GAGCTTGGAAACAGAGCTTTTGACCGGAGAGAAAAGCGACGTCGCCCGGAGAAGAGTTTGAT  
BrPAL-2 (2017) GAGCTTGGAAACAGAGCTTTTGACCGGAGAGAAAAGCGACGTCGCCCGGAGAAGAGTTTGAT  
BrPAL-3 (964) GAGCTTGGAAACAGAGCTTTTGACCGGAGAGAAAAGTGACGTCGCCCGGAGAAGAGTTTGAT  
BrPAL-4 (2017) GAGCTTGGAAACAGAGCTTTTGACCGGAGAGAAAAGCGACGTCGCCCGGAGAAGAGTTTGAT  
BoPAL-1 (2020) GAGCTTGGAAACGAAGCTGTTGACCGGAGAGAAAAGTTGCTGTCTCCGGGAGAGGAGTTTGAT  
BoPAL-2 (2008) GAGCTTGGAACTGAGCTTTTGACCGGAGAGAAAAGTGACGTCGCCCGGAGAAGAGTTTGAT  
BoPAL-3 (2017) GAGCTTGGAAACAAAGCTTTTGACCGGAGAGAAAAGCGACGTCGCCCGGAGAAGAGTTTGAT  
BjPAL (1803) GAGCTTGGAAACAGAGCTTTTGACCGGAGAGAAAAGCGACGTCGCCCGGAGAAGAGTTTGAT

AtPAL (2086) AAGGTTTTACGGCGATTTGTGAAGGTAATAATCATTGATCCGATGATGGAATGTCTCAAC  
BnPAL1-1 (2175) AAGGTTTTACGGCGATTTGTGAAGGGAAGATTATTGATCCGTTGATGGAGTGTCTCGAT  
BnPAL1-2 (2168) AAGGTTTTACGGCGATATGTGAAGGGAAGATCATTGATCCGTTGATGGAGTGTCTCAGT  
BnPAL2-1 (2197) AAGGTGTTCACTGCAATGTGTGAAGGTAAGATTATTGATCCATTGATGGATTGTCTCAAG  
BnPAL2-2 (2202) AAGGTGTTCACTGCAATGTGTGAAGGTAAGATCATTGATCCGTTGATGGAGTGCCTCAAG  
BrPAL-1 (2077) AAGGTTTTACGGCGATTTGTGAAGGGAAGATTATTGGTCCGTTGATGGAGTGTCTCGAT  
BrPAL-2 (2077) AAGGTTTTACGGCGATCTGTGAAGGGAAGATTATTGATCCGTTGATGGAGTGTCTCGAT  
BrPAL-3 (1024) AAGGTTTTACGGCGATATGTGAAGGGAAGATCATTGATCCGTTGATGGAGTGTCTCAGT  
BrPAL-4 (2077) AAGGTTTTACGGCGATATGTGAAGGGAAGATTATTGATCCGTTGATGGAGTGTCTCGAT  
BoPAL-1 (2080) AAGGTGTTCACTGCAATGTGTGAAGGTAAGATCATTGATCCGTTGATGGAGTGCCTCAAG  
BoPAL-2 (2068) AAGGTTTTACGGCGATATGTGAAGGGAAGATCATTGATCCGTTGATGGAGTGTCTCAGT  
BoPAL-3 (2077) AAGGTTTTACGGCGATTTGTGAAGGGAAGATTATTGATCCGTTGATGGAGTGTCTCGAT  
BjPAL (1863) AAGGTTTTACGGCGATCTGTGAAGGGAAGATTATTGGTCCGTTGA-----

AtPAL (2146) GAGTGAACGGAGCTCCCATTCCAATATGTTAA-----  
BnPAL1-1 (2235) GAGTGAACGGAGCTCCCATTCCTATATGTTAAGAGTGATTAAGGTTCTCTGTTTTTTT  
BnPAL1-2 (2228) GAGTGAACGGAGCTCCCATTCCAATATGCTAAGAGTGAAGGGTTCTGTTTTTTTTTTA  
BnPAL2-1 (2257) GAATGAACGGAGCTCCCATTCCTATATGTTAAGAGAGCCTTCCTCTGTTATGCTCTGTT  
BnPAL2-2 (2262) GAATGAACGGAGCTCCGATTCGATATGCTAAGACATCATTCCCTCTGTTTT--TTGTT  
BrPAL-1 (2137) GAGTGAACGGAGCTCCCATTCCTATATGTTAA-----  
BrPAL-2 (2137) GAGTGAACGGAGCTCCCATTCCTATATGTTAA-----  
BrPAL-3 (1084) GAGTGAACGGAGCTCCCATTCCTATGCTAA-----  
BrPAL-4 (2137) GAGTGAACGGAGCTCCCATTCCTATATGTTAA-----  
BoPAL-1 (2140) GAATGAACGGAGCTCCCATTCGATATGTTAA-----  
BoPAL-2 (2128) GAGTGAACGGAGCTCCCATTCCTATGCTAA-----  
BoPAL-3 (2137) GAGTGAACGGAGCTCCCATTCCTATATGTTAA-----  
BjPAL (1909) -----

AtPAL (2179) -----  
BnPAL1-1 (2295) TTTTACTATAAAGTTTTATTTTTTAAATGTCTGAATAATTTTACCAAATGATTCCTGT  
BnPAL1-2 (2288) CTACAAAAGTTCTTTTTTTTTTCCCTTTAAATATCTGAATAATTTGTAATAATGGTACT  
BnPAL2-1 (2317) CTGTTTTGTCCAGCTCAGTTTTGTGTCTTTTGCTTTTGAATTTGAGTGTAAATGCA  
BnPAL2-2 (2320) GC-TTTTACCTTTTTTATATGTTTGAATTGAGTGTTTTATCAGTGAGTAATTGTAATGTA  
BrPAL-1 (2170) -----  
BrPAL-2 (2170) -----  
BrPAL-3 (1117) -----  
BrPAL-4 (2170) -----  
BoPAL-1 (2173) -----  
BoPAL-2 (2161) -----  
BoPAL-3 (2170) -----  
BjPAL (1909) -----

AtPAL (2179) -----  
BnPAL1-1 (2355) GAAGTGGTTTCTGTCTTTGTCTAGTTTATAAATCTGTAAAACCTCATTGTAAGTTCTCAA  
BnPAL1-2 (2348) CTGTGAAGTCTTTTTTATTTGTCTAATTCCAAAGTTGTTTTATAAACTAAAAA  
BnPAL2-1 (2377) ATGGTGTCACTTTGTATAATATATATGAAAATACGTGTAATTCTCAAAAAAAAAAAAA  
BnPAL2-2 (2379) ATGGTGTCACTTTGTATGATATATATGAAAATCACGTGTAACATAAAAAAAAAAAAA

BrPAL-1 (2170) -----  
 BrPAL-2 (2170) -----  
 BrPAL-3 (1117) -----  
 BrPAL-4 (2170) -----  
 BoPAL-1 (2173) -----  
 BoPAL-2 (2161) -----  
 BoPAL-3 (2170) -----  
 BjPAL (1909) -----

AtPAL (2179) -----  
 BnPAL1-1 (2415) ATGAACATTTTTTTCTTGTACAAGTGTGAAATGATACATTTTGTCAAAAAAAAAAAAA  
 BnPAL1-2 (2408) AAAAAAAAAAAAAA-----  
 BnPAL2-1 (2437) AAAAAAAA-----  
 BnPAL2-2 (2439) AAAAAAAA-----  
 BrPAL-1 (2170) -----  
 BrPAL-2 (2170) -----  
 BrPAL-3 (1117) -----  
 BrPAL-4 (2170) -----  
 BoPAL-1 (2173) -----  
 BoPAL-2 (2161) -----  
 BoPAL-3 (2170) -----  
 BjPAL (1909) -----

AtPAL (2179) -----  
 BnPAL1-1 (2475) AAAAAAAAAAAAAA  
 BnPAL1-2 (2422) -----  
 BnPAL2-1 (2445) -----  
 BnPAL2-2 (2447) -----  
 BrPAL-1 (2170) -----  
 BrPAL-2 (2170) -----  
 BrPAL-3 (1117) -----  
 BrPAL-4 (2170) -----  
 BoPAL-1 (2173) -----  
 BoPAL-2 (2161) -----  
 BoPAL-3 (2170) -----  
 BjPAL (1909) -----

## 2. BnC4H

AtC4H (1) -----  
 BnC4HA (1) -----AGCAGCTCCTTCTGCTT-T  
 BnC4HB (1) -----TCAGCAGCTCCTTCTGCTT-T  
 Br-cr-C4HL (1) -----  
 BrA-C4HL (1) -----  
 Br-sk-C4HL (1) -----  
 BcCyp450\_C4H (1) CCTTATTTAACTCATCTAGAGGCCAATCGGCCATCACGCTCAGCAGCTTCTTCTGCTTCT  
 BrC4H(DQ457008) (1) -----  
 BrC4H-1 (1) -----  
 BrC4H-2 (1) -----  
 BrC4H-3 (1) -----  
 BrC4H-4 (1) -----  
 BrC4H-5 (1) -----  
 BoC4H-1 (1) -----  
 BoC4H-2 (1) -----  
 BoC4H-3 (1) -----  
 BoC4H-4 (1) -----  
 BoC4H-5 (1) -----

AtC4H (1) -----  
 BnC4HA (19) CTCTCACATTTGCCTGAAAATCAA-----TCAATCACTGTAACAACAAAGAAAA-TC  
 BnC4HB (21) CTCTCACATTTGCCTGAAAATCAA-----TCAATCACTGTAACAACAAAGAAAA-TC  
 Br-cr-C4HL (1) --CTCACATTTGCCTGAAAATCAACCAATCAATCAATCACTGTAATAACAAAAAATC  
 BrA-C4HL (1) --CTCACATTTGCCTGAAAATCAACCAATCAATCAATCACTGTAATAACAAAAA--TC  
 Br-sk-C4HL (1) --CTCACATTTGCCTGAAAATCAACCAATCAATCAATCACTGTAATAACAAAAA--TC



|                 |       |                                                                  |
|-----------------|-------|------------------------------------------------------------------|
| BrC4H-5         | (89)  | TACTAAAACCTACCTCCCGGTCCTATACCGATACCAATCTTCGGAAACTGGCTCCAGGTCC    |
| BoC4H-1         | (89)  | AACTGAAGCTACCTCCTGGTCCTATACCGGTTCCGGTCTTCGGAAACTGGCTCCAGGTCC     |
| BoC4H-2         | (89)  | AACTGAAACTACCTCCCGGTCCTATACCGATACCAATCTTCGGAAACTGGCTCCAGGTCC     |
| BoC4H-3         | (89)  | AGCTGAAGCTCCCTCCAGGTCCATGCGGATTCCAATATTCGGAAACTGGCTCCAAGTCC      |
| BoC4H-4         | (89)  | AACTGAAGCTACCTCCTAGTCCCTATACCTATTCCCTATCTTCGGAAACTGGCTCCAGGTCC   |
| BoC4H-5         | (89)  | AACTAAAACCTACCTCCTGGTCCTATCCCCATTCCCATCTTCGGAAACTGGCTCCAAGTCC    |
|                 |       |                                                                  |
| AtC4H           | (149) | GAGATGATCTCAACCACCGTAACCTCGTTCGACTACGCTAAGAAATTCGGCGATCTCTTCC    |
| BnC4HA          | (242) | GAGACGATCTAAACCACCGCAACCTCGTTCGACTACGCTAAAAAATTCGGCGACCTCTTCC    |
| BnC4HB          | (244) | GAGATGATCTCAACCACCGTAACCTCGTTCGACTACGCTAAGAAATTCGGGAGACCTCTTCC   |
| Br-cr-C4HL      | (238) | GAGACGATCTAAACCACCGTAACCTCGTTCGACTACGCTAAGAAATTCGGGAGACCTCTTCC   |
| BrA-C4HL        | (236) | GAGACGATCTAAACCACCGTAACCTCGTTCGACTACGCTAAAAAATTCGGGAGACCTCTTCC   |
| Br-sk-C4HL      | (236) | GAGACGATCTAAACCACCGTAACCTCGTTCGACTACGCTAAAAAATTCGGGAGACCTCTTCC   |
| BcCyp450_C4H    | (298) | GAGACGATCTAAACCACCGTAACCTCGTTCGACTACGCTAAAAAATTCGGGAGACCTCTTCC   |
| BrC4H(DQ457008) | (237) | GAGACGATCTAAACCACCGTAACCTCGTTCGACTACGCTAAGAAATTCGGGAGACCTCTTCC   |
| BrC4H-1         | (149) | GAGACGATCTAAACCACCGTAACCTCGTTCGACTACGCTAAAAAATTCGGGAGACCTCTTCC   |
| BrC4H-2         | (149) | GAGATGATCTCAACCACCGTAACCTCGTTCGACTACGCTAAAAAATTCGGGAGACCTCTTCC   |
| BrC4H-3         | (149) | GAGATGATCTCAACCACCGTAACCTCGTTCGACTACGCTAAGAAATTCGGGAGACCTCTTCC   |
| BrC4H-4         | (149) | GAAATGATCTAAATCACCGTAACCTCGTTCGACTACGCTAAGAAATTCGGGAGACCTCTTCC   |
| BrC4H-5         | (149) | GAGACGATCTCAACCACCGTAACCTCGTTCGACTACGCTAAAAAATTCGGGAGACCTCTTCC   |
| BoC4H-1         | (149) | GAGATGATCTAAACCACCGTAACCTCGTAGACTACGCTAAGAAATTCGGGAGACCTCTTCC    |
| BoC4H-2         | (149) | GAGACGATCTCAACCACCGTAACCTCGTTCGACTACGCTAAAAAATTCGGGAGACCTCTTCC   |
| BoC4H-3         | (149) | GAGACGATCTAAACCACCGCAACCTCGTTCGACTACGCTAAAAAATTCGGGAGACCTCTTCC   |
| BoC4H-4         | (149) | GAGATGATCTCAACCACCGTAACCTCGTTCGACTACGCTAAAAAATTCGGGAGACCTCTTCC   |
| BoC4H-5         | (149) | GAGATGATCTCAACCACCGCAACCTCGTTCGACTACGCTAAGAAATTCGGGAGACCTCTTCC   |
|                 |       |                                                                  |
| AtC4H           | (209) | TCCTCCGTATGGGTCAAGCAAACCTAGTTCGTCGTCCTCACCAGGATCTAACAAAGGAAG     |
| BnC4HA          | (302) | TCCTCAGGATGGGCCAGCGAAACCTAGTTCGTCGTCCTCACCAGGATCTAACAAAGGAAG     |
| BnC4HB          | (304) | TCCTCCGTATGGGCCAGCGAAACCTAGTTCGTCGTCCTCCTCCCAACTTACCAAAGGAAG     |
| Br-cr-C4HL      | (298) | TCCTCAGGATGGGCCAGCGAAACCTAGTTCGTCGTCCTCCTCCCAACTCACCAGGAAG       |
| BrA-C4HL        | (296) | TCCTCAGGATGGGCCAGCGAAACCTAGTTCGTCGTCCTCCTCCCAACTCACCAGGAAG       |
| Br-sk-C4HL      | (296) | TCCTCAGGATGGGCCAGCGAAACCTAGTTCGTCGTCCTCCTCCCAACTCACCAGGAAG       |
| BcCyp450_C4H    | (358) | TCCTCAGGATGGGCCAGCGAAACCTAGTTCGTCGTCCTCCTCCCAACTCACCAGGAAG       |
| BrC4H(DQ457008) | (297) | TCCTCAGGATGGGCCAGCGAAACCTAGTTCGTCGTCCTCCTCCCAACTCACCAGGAAG       |
| BrC4H-1         | (209) | TCCTCAGGATGGGCCAGCGAAACCTAGTTCGTCGTCCTCCTCCCAACTCACCAGGAAG       |
| BrC4H-2         | (209) | TTTTCAAGATGGGTCAAGCAAACCTAGTTCGTCGTCCTCCTCCCAACTTACCAAAGGAAG     |
| BrC4H-3         | (209) | TCCTCCGTATGGGCCAGAGAAACCTAGTTCGTCGTCCTCCTCACCAACTAACCAAAGGAAG    |
| BrC4H-4         | (209) | ACCTAAGGATGGGTCAAGCAAACCTAGTTCGTCGTCCTCCTCACCAGGATCTAGCCAAAGGAAG |
| BrC4H-5         | (209) | TCCTCAGGATGGGACAGCGAAACCTAGTTCGTCGTCCTCCTCCCAACTAACCAAAGGAAG     |
| BoC4H-1         | (209) | ACTTACGGATGGGTCAAGCAAACCTAGTTCGTCGTCCTCCTCACCAGGATCTAGCCAAAGGAAG |
| BoC4H-2         | (209) | TCCTCAGGATGGGACAGCGAAACCTAGTTCGTCGTCCTCCTCACCAGGATCTAACCAAAGGAAG |
| BoC4H-3         | (209) | TCCTCAGGATGGGCCAGCGAAACCTAGTTCGTCGTCCTCCTCCCAACTCACCAGGAAG       |
| BoC4H-4         | (209) | TTTTCAAGATGGGTCAAGCAAACCTAGTTCGTCGTCCTCCTCACCAGGATCTAACCAAAGGAAG |
| BoC4H-5         | (209) | TCCTCCGTATGGGACAGAGAAACCTAGTTCGTCGTCCTCCTCCCAACTCACCAGGAAG       |
|                 |       |                                                                  |
| AtC4H           | (269) | TGCTCCCTCACTCAAGGCGTTGAGTTGGATCCAGAACGAGAAACGTCGTGTTTCGACATTT    |
| BnC4HA          | (362) | TCCTCCACACGCAGGGAGTCGAGTTCGGATCTCGAACGAGAAACGTCGTCTTCGACATCT     |
| BnC4HB          | (364) | TGCTCCACACGCAGGGAGTCGAGTTCGGATCTCGAACGAGAAACGTCGTCTTCGACATCT     |
| Br-cr-C4HL      | (358) | TCCTCCACACGCAGGGGTCGAGTTCGGATCTCGAACGAGAAACGTCGTCTTCGACATCT      |
| BrA-C4HL        | (356) | TCCTCCACACGCAGGGGTCGAGTTCGGATCTCGAACGAGAAACGTCGTCTTCGACATCT      |
| Br-sk-C4HL      | (356) | TCCTCCACACGCAGGGGTCGAGTTCGGATCTCGAACGAGAAACGTCGTCTTCGACATCT      |
| BcCyp450_C4H    | (418) | TCCTCCACACGCAGGGGTCGAGTTCGGATCTCGAACGAGAAACGTCGTCTTCGACATCT      |
| BrC4H(DQ457008) | (357) | TCCTCCACACGCAGGGGTCGAGTTCGGATCTCGAACGAGAAACGTCGTCTTCGACATCT      |
| BrC4H-1         | (269) | TCCTCCACACGCAGGGGTCGAGTTCGGATCTCGAACGAGAAACGTCGTCTTCGACATCT      |
| BrC4H-2         | (269) | TACTCCACACACAAGGCGTAGAGTTTGGTTCCCGACACAGAAACATGGTGTACGATATCT     |
| BrC4H-3         | (269) | TGCTCCACACGCAGGGGTCGAGTTCGGATCTCGAACGAGAAACGTCGTCTTCGACATCT      |
| BrC4H-4         | (269) | TGCTCCAAACGCAAGGTGTAGAGTTTGGATCCAGATACAGAAACATCGTCTACGACATCT     |
| BrC4H-5         | (269) | TGCTCCACACGCAGGGGTCGAGTTCGGATCTCGAACGAGAAACGTCGTCTTCGACATCT      |
| BoC4H-1         | (269) | TGCTCCAAACACAAGGTGTAGAGTTTGGATCCAGATACAGAAACATCGTCTACGACATCT     |
| BoC4H-2         | (269) | TGCTCCACACGCAGGGGTCGAGTTCGGATCTCGAACGAGAAACGTCGTCTTCGACATCT      |
| BoC4H-3         | (269) | TCCTCCACACGCAGGGGTCGAGTTCGGATCTCGAACGAGAAACGTCGTCTTCGACATCT      |
| BoC4H-4         | (269) | TGCTCCACACACAAGGCGTAGAGTTTGGTTCCCGACACAGAAACATGGTGTACGATATCT     |
| BoC4H-5         | (269) | TGCTCCACACGCAGGGGTCGAGTTCGGATCTCGAACGAGAAACGTCGTCTTCGACATCT      |

AtC4H (329) TCACGGGAAAGGTCAAGATATGGTGTTCACCTGTTACGGCGAGCATTGGAGGAAGATGA  
BnC4HA (422) TCACGGGCAAAGGGCAGGACATGGTGTTCACCGTCTACGGAGAGCACTGGCGCAAGATGA  
BnC4HB (424) TCACAGGCAAAGGACAGGACATGGTGTTCACCTGTTACGGCGAACACTGGCGTAAGATGA  
Br-cr-C4HL (418) TCACGGGAAAGGACAGGACATGGTGTTCACCGTCTACGGAGAGCACTGGCGCAAGATGA  
BrA-C4HL (416) TCACGGGCAAAGGGCAGGACATGGTGTTCACCGTCTACGGAGAGCACTGGCGCAAGATGA  
Br-sk-C4HL (416) TCACGGGCAAAGGGCAGGACATGGTGTTCACCGTCTACGGAGAGCACTGGCGCAAGATGA  
BcCyp450\_C4H (478) TCACGGGCAAAGGGCAGGACATGGTGTTCACCGTCTACGGAGAGCACTGGCGCAAGATGA  
BrC4H(DQ457008) (417) TCACGGGAAAGGACAGGACATGGTGTTCACCGTCTACGGTGTGAGCACTGGAGGAAGATGC  
BrC4H-1 (329) TCACGGGCAAAGGGCAGGACATGGTGTTCACCGTCTACGGAGAGCACTGGCGCAAGATGA  
BrC4H-2 (329) TCACGGGAAGGGACAAGACATGGTGTTCACCGTGTATGGTGAGCACTGGAGGAAGATGC  
BrC4H-3 (329) TCACAGGCAAAGGACAGGACATGGTGTTCACCGTGTACGGCGAACACTGGCGTAAGATGC  
BrC4H-4 (329) TCACTGGGAAAGGACAAGACATGGTGTTCACCTGTTACGGTGTGAGCACTGGAGGAAGATGA  
BrC4H-5 (329) TCACGGGCAAAGGGCAGGACATGGTGTTCACCGTCTACGGAGAGCACTGGAGGAAGATGA  
BoC4H-1 (329) TCACTGGGAAAGGACAAGACATGGTGTTCACCTGTTACGGTGTGAGCACTGGAGGAAGATGC  
BoC4H-2 (329) TCACGGGCAAAGGGCAGGACATGGTGTTCACCGTCTACGGCGAGCACTGGAGGAAGATGA  
BoC4H-3 (329) TCACGGGCAAAGGGCAGGACATGGTGTTCACCGTATAACGGAGAGCACTGGCGCAAGATGA  
BoC4H-4 (329) TCACGGGAAGGGACAAGACATGGTGTTCACCGTGTACGGCGAGCACTGGAGGAAGATGC  
BoC4H-5 (329) TCACAGGCAAAGGACAGGACATGGTGTTCACCGTCTACGGTGTGAGCACTGGCGTAAGATGA

AtC4H (389) GAAGAATCATGACGGTTCCTTTCTTCACCAACAAAGTTGTTCAACAGAATCGTGAAGGTT  
BnC4HA (482) GGAGGATCATGACGGTTCCTTTCTTCACCAACAAGGTGGTTTCAGCAGAAACAGAGAAGGAT  
BnC4HB (484) GAAGGATCATGACGGTTCCTTTCTTCACCAACAAGGTTGTGCAACGGAAACAGAGAAGGAT  
Br-cr-C4HL (478) GACGGATCATGACGGTTCCTTTCTTCACCAACAAGGTGGTTTCAGCAGAAACAGAGAAGGAT  
BrA-C4HL (476) GACGGATCATGACGGTTCCTTTCTTCACCAACAAGGTGGTTTCAGCAGAAACAGAGAAGGAT  
Br-sk-C4HL (476) GACGGATCATGACGGTTCCTTTCTTCACCAACAAGGTGGTTTCAGCAGAAACAGAGAAGGAT  
BcCyp450\_C4H (538) GACGGATCATGACGGTTCCTTTCTTCACCAACAAGGTGGTTTCAGCAGAAACAGAGAAGGAT  
BrC4H(DQ457008) (477) GACGTATCATGACGGTTCCTTTCTTCACCAACAAAGTTGTTTCAGCAGAAATCATGAAGGTT  
BrC4H-1 (389) GACGGATCATGACGGTTCCTTTCTTCACCAACAAGGTGGTTTCAGCAGAAACAGAGAAGGAT  
BrC4H-2 (389) GACGTATCATGACGGTTCCTTTCTTCACCAACAAGGTGGTTTCAGCAGAAATCATGAAGGTT  
BrC4H-3 (389) GTCGGATCATGACGGTTCCTTTCTTCACCAACAAGGTTGTGTCAGCGGAAACAGAGAAGGAT  
BrC4H-4 (389) GACGTATCATGACGGTTCCTTTCTTCACCAACAAGGTGGTTTCAGCAGAAACCGGGAAGGAT  
BrC4H-5 (389) GGAGGATCATGACGGTTCCTTTCTTCACCAACAAGGTTGTGTCAGCGGAAACAGAGAAGGAT  
BoC4H-1 (389) GACGTATCATGACGGTTCCTTTCTTCACCAACAAGGTGGTTTCAGCAGAAACCGGGAAGGAT  
BoC4H-2 (389) GAAGGATCATGACGGTTCCTTTCTTCACCAACAAGGTTGTGTCAGCGGAAACAGAGAAGGAT  
BoC4H-3 (389) GACGGATCATGACGGTTCCTTTCTTCACCAACAAGGTGGTTTCAGCAGAAACAGAGAAGGAT  
BoC4H-4 (389) GACGTATCATGACGGTTCCTTTCTTCACCAACAAAGTTGTTTCAGCAGAAATCATGAAGGAT  
BoC4H-5 (389) GAAGGATCATGACGGTTCCTTTCTTCACCAACAAAGTTGTGTCAGCGGAAACAGGGAAGGTT

AtC4H (449) GGGAGTTTGAAGCAGCTAGTGTGTTGAAGATGTTAAGAAGAATCCAGATTCTGCTACGA  
BnC4HA (542) GGGAGTTTGAAGCCGCGAGCGTGGTGGAGGATGTCAAGAAGAATCCTGACTCCGCGACCA  
BnC4HB (544) GGGAGTTTGAAGCTGCGAGTGTGCTGGAGGACGTGAAGAAGAATCCTGACTCCGCGACCA  
Br-cr-C4HL (538) GGGAGTTTGAAGCCGCGAGCGTGGTGGAGGATGTGAAGAAGAATCCTGACTCCGCGACCA  
BrA-C4HL (536) GGGAGTTTGAAGCCGCGAGCGTGGTGGAGGATGTGAAGAAGAATCCTGACTCCGCGACCA  
Br-sk-C4HL (536) GGGAGTTTGAAGCCGCGAGCGTGGTGGAGGATGTGAAGAAGAATCCTGACTCCGCGACCA  
BcCyp450\_C4H (598) GGGAGTTTGAAGCCGCGAGCGTGGTGGAGGATGTGAAGAAGAATCCTGACTCCGCGACCA  
BrC4H(DQ457008) (537) GGGAGTTTGAAGCCGCGAGCGTGGTGGAGGATGTGAAGAAGAATCCTGACTCCGCGACCA  
BrC4H-1 (449) GGGAGTTTGAAGCCGCGAGCGTGGTGGAGGATGTGAAGAAGAATCCTGACTCCGCGACCA  
BrC4H-2 (449) GGGAGTTTGAAGCCGCGAGCGTGGTGGAGGATGTGAAGAAGAATCCTGACTCCGCGACCA  
BrC4H-3 (449) GGGAGTTTGAAGCCGCGAGTGTGCTGGAGGACGTGAAGAAGAATCCTGACTCCGCGACCA  
BrC4H-4 (449) GGGAGTTTGAAGCTGCGAGCGTGGTGGAGGAAAGTGAAGAAGAATCCTGACTCCGCGACCA  
BrC4H-5 (449) GGGAGCTTGAAGCCGCGAGCGTGGTGGAGGACGTGAAGAAGAATCCTGACTCCGCGACCA  
BoC4H-1 (449) GGGAGTTTGAAGCTGCGAGCGTGGTGGAGGAAAGTGAAGAAGAATCCTGACTCCGCGACCA  
BoC4H-2 (449) GGGAGTTTGAAGCCGCGAGCGTGGTGGAGGAAAGTGAAGAAGAATCCTGACTCCGCGACCA  
BoC4H-3 (449) GGGAGTTTGAAGCCGCGAGCGTGGTGGAGGATGTGAAGAAGAATCCTGACTCCGCGACCA  
BoC4H-4 (449) GGGAGTTTGAAGCCGCGAGCGTGGTGGAGGATGTGAAGAAGAATCCTGACTCCGCGACCA  
BoC4H-5 (449) GGGAGTTTGAAGCTGCGAGCGTGGTGGAGGACGTGAAGAAGAATCCTGACTCCGCGACCA

AtC4H (509) AAGGAATCGTGTGAGGAAACGTTTTCGCAATTGATGATGTATAACAATATGTTCCGTATCA  
BnC4HA (602) AAGGGATCGTGTGAGGAAACGTTTTCGAGTTGATGATGTACAACAACATGTTCCGTATCA  
BnC4HB (604) AAGGGATTGTGTTGAGGAAACGTTTTCGAGTTGATGATGTACAACAACATGTTCCGTATCA  
Br-cr-C4HL (598) AAGGGATCGTGTGAGGAAACGTTTTCGAGTTGATGATGTACAACAACATGTTCCGTATCA  
BrA-C4HL (596) AAGGGATCGTGTGAGGAAACGTTTTCGAGTTGATGATGTACAACAACATGTTCCGTATCA

Br-sk-C4HL (596) AAGGGATCGTGTTGAGGAAGCGCTTGCAGTTGATGATGTACAACAACATGTTCCGTATCA  
 BcCyp450\_C4H (658) AAGGGATCGTGTTGAGGAAGCGCTTGCAGTTGATGATGTACAACAACATGTTCCGTATCA  
 BrC4H(DQ457008) (597) AAGGGATCGTGGTGAGGAAGCGTTTGCAGTTGATGGTGTATAACAACATGTTCCGTATCA  
 BrC4H-1 (509) AAGGGATCGTGTTGAGGAAGCGCTTGCAGTTGATGATGTACAACAACATGTTCCGTATCA  
 BrC4H-2 (509) AAGGGATCGTGGTGAGGAAGCGTTTGCAGTTGATGGTGTATAACAACATGTTCCGTATCA  
 BrC4H-3 (509) AAGGGATGATATTGAGGAAACGCTTGCAGTTGATGATGTACAACAACATGTTCCGTATCA  
 BrC4H-4 (509) AAGGGATCGTGGCGAGGAAGCGTTTGCAGTTGATGATGTACAACAACATGTTCCGTATCA  
 BrC4H-5 (509) AAGGGATCGTGTTGAGGAAGCGCTTGCAGTTGATGATGTACAACAACATGTTCCGTATCA  
 BoC4H-1 (509) AAGGGATCGTGGTGAGGAAGCGTTTGCAGTTGATGATGTACAACAACATGTTCCGTATCA  
 BoC4H-2 (509) AAGGGATCGTGTTGAGGAAGCGCTTGCAGTTGATGATGTACAACAACATGTTCCGTATCA  
 BoC4H-3 (509) AAGGGATCGTGTTGAGGAAGCGCTTGCAGTTGATGATGTACAACAACATGTTCCGTATCA  
 BoC4H-4 (509) AAGGGATCGTGGTGAGGAAGCGTTTGCAGTTGATGGTGTATAACAACATGTTCCGTATCA  
 BoC4H-5 (509) AAGGGATGATGTTAAGGAAACGCTTGCAGTTGATGATGTACAACAACATGTTCCGTATCA

AtC4H (569) TGTTTCGATAGAAGATTTGAGAGTGAGGATGATCCTCTTTTCCTTAGGCTTAAGGCCTTGA  
 BnC4HA (662) TGTTTCGATAGGAGGTTTGTATAGTGAGGATGATCCCTGTTTATAAGGCTTAAGGCCTTGA  
 BnC4HB (664) TGTTTCGATAGAAGTTTCGAGAGTGAGGATGATCCTCTGTTTCCTCAGGCTCAAAGCCTTGA  
 Br-cr-C4HL (658) TGTTTCGATAGGAGGTTTGTATAGTGAGGATGATCCTCTGTTTATAAGGCTTAAGGCCTTGA  
 BrA-C4HL (656) TGTTTCGATAGGAGGTTTGTATAGTGAGGATGATCCTCTGTTTATAAGGCTTAAGGCCTTGA  
 Br-sk-C4HL (656) TGTTTCGATAGGAGGTTTGTATAGTGAGGATGATCCTCTGTTTATAAGGCTTAAGGCCTTGA  
 BcCyp450\_C4H (718) TGTTTCGATAGGAGGTTTGTATAGTGAGGATGATCCTCTGTTTATAAGGCTTAAGGCCTTGA  
 BrC4H(DQ457008) (657) TGTTTCGATAGAAGGTTTTCGAGAGTGAGGATGATCCTCTGTTTATAAGGCTTAAGGCCTTGA  
 BrC4H-1 (569) TGTTTCGATAGGAGGTTTGTATAGTGAGGATGATCCTCTGTTTATAAGGCTTAAGGCCTTGA  
 BrC4H-2 (569) TGTTTCGATAGAAGGTTTTCGAGAGTGAGGATGATCCTCTGTTTATAAGGCTTAAGGCCTTGA  
 BrC4H-3 (569) TGTTTCGATAGAAGGTTTTCGAGAGTGAGGATGATCCTCTGTTTATAAGGCTTAAGGCCTTGA  
 BrC4H-4 (569) TGTTTCGATAGAAGGTTTTCGAGAGTGAGGATGATCCTCTGTTTATAAGGCTTAAGGCCTTGA  
 BrC4H-5 (569) TGTTTCGATAGAAGGTTTTCGAGAGTGAGGATGATCCTCTGTTTATAAGGCTTAAGGCCTTGA  
 BoC4H-1 (569) TGTTTCGATAGAAGGTTTTCGAGAGTGAGGATGATCCTCTGTTTATAAGGCTTAAGGCCTTGA  
 BoC4H-2 (569) TGTTTCGATAGAAGGTTTTCGAGAGTGAGGATGATCCTCTGTTTATAAGGCTTAAGGCCTTGA  
 BoC4H-3 (569) TGTTTCGATAGGAGGTTTGTATAGTGAGGATGATCCTCTGTTTATAAGGCTTAAGGCCTTGA  
 BoC4H-4 (569) TGTTTCGATAGAAGGTTTTCGAGAGTGAGGATGATCCTCTGTTTATAAGGCTTAAGGCCTTGA  
 BoC4H-5 (569) TGTTTCGATAGAAGGTTTTCGAGAGTGAGGATGATCCTCTGTTTATAAGGCTTAAGGCCTTGA

AtC4H (629) ATGGTGAGAGAAGTCGATTAGCTCAGAGCTTTGAGTATAACTATGGAGATTTTCATCCCTA  
 BnC4HA (722) ACGGAGAGAGGAGCAGGTTGGCTCAGAGCTTTGAGTATAACTACGGAGACTTCATCCCTA  
 BnC4HB (724) ACGGAGAGAGAAGTAGGTTGGCTCAGAGCTTTGAGTATAACTATGGAGACTTCATCCCTA  
 Br-cr-C4HL (718) ACGGAGAGAGGAGCAGGTTGGCTCAGAGCTTTGAGTATAACTACGGAGACTTCATCCCTA  
 BrA-C4HL (716) ACGGAGAGAGGAGCAGGTTGGCTCAGAGCTTTGAGTATAACTACGGAGACTTCATCCCTA  
 Br-sk-C4HL (716) ACGGAGAGAGGAGCAGGTTGGCTCAGAGCTTTGAGTATAACTACGGAGACTTCATCCCTA  
 BcCyp450\_C4H (778) ACGGAGAGAGGAGCAGGTTGGCTCAGAGCTTTGAGTATAACTACGGAGACTTCATCCCTA  
 BrC4H(DQ457008) (717) ACGGAGAGAGGAGCAGGTTGGCTCAGAGCTTTGAGTATAACTATGGAGATTTTCATCCCTA  
 BrC4H-1 (629) ACGGAGAGAGGAGCAGGTTGGCTCAGAGCTTTGAGTATAACTACGGAGACTTCATCCCTA  
 BrC4H-2 (629) ACGGAGAGAGAGGAGCAGGTTGGCTCAGAGCTTTGAGTATAACTATGGAGATTTTCATCCCTA  
 BrC4H-3 (629) ACGGAGAGAGAAGCAGGTTGGCTCAGAGCTTTGAGTATAACTATGGAGACTTCATCCCTA  
 BrC4H-4 (629) ACGGGAGAGAAGCAGGTTGGCTCAGAGCTTTGAGTATAACTATGGAGATTTTCATCCCTA  
 BrC4H-5 (629) ACGGAGAGAGAAGTAGATTGGCTCAGAGCTTTGAGTATAACTATGGAGATTTTCATCCCTA  
 BoC4H-1 (629) ACGGGAGAGAAGCAGGTTGGCTCAGAGCTTTGAGTATAACTATGGAGATTTTCATCCCTA  
 BoC4H-2 (629) ACGGAGAGAGAAGCAGGTTGGCTCAGAGCTTCGAGTACAACATGGAGATTTTCATCCCTA  
 BoC4H-3 (629) ACGGAGAGAGGAGCAGGTTGGCTCAGAGCTTTGAGTATAACTACGGAGACTTCATCCCTA  
 BoC4H-4 (629) ACGGAGAGAGAGGAGCAGGTTGGCTCAGAGCTTTGAGTATAACTATGGAGATTTTCATCCCTA  
 BoC4H-5 (629) ACGGAGAGAGAAGCAGGTTGGCTCAGAGCTTTGAGTACAACATGGAGACTTCATCCCTA

AtC4H (689) TCCTTAGACCATTCCCTCAGAGGCTATTTGAAGATTTGTCAAGATGTGAAAGATCGAAGAAC  
 BnC4HA (782) TCCTTAGGCCGTTCCCTTAGAGGCTACTTGAAGATCTGTCAAGATGTGAAAGATCGAAGAC  
 BnC4HB (784) **TCCTCAGGCCGTTCTG**AGAGGTTACTTGAAGATTTGTCAAGATGTGAAAGATCGAAGAC  
 Br-cr-C4HL (778) TCCTTAGGCCGTTCCCTTAGAGGCTACTTGAAGATCTGTCAAGATGTGAAAGATCGAAGAC  
 BrA-C4HL (776) TCCTTAGGCCGTTCCCTTAGAGGCTACTTGAAGATCTGTCAAGATGTGAAAGATCGAAGAC  
 Br-sk-C4HL (776) TCCTTAGGCCGTTCCCTTAGAGGCTACTTGAAGATCTGTCAAGATGTGAAAGATCGAAGAC  
 BcCyp450\_C4H (838) TCCTTAGGCCGTTCCCTTAGAGGCTACTTGAAGATCTGTCAAGATGTGAAAGATCGAAGAC  
 BrC4H(DQ457008) (777) TCCTTAGGCCGTTCCCTTAGAGGCTACTTGAAGATCTGTCAAGATGTGAAAGATCGAAGAC  
 BrC4H-1 (689) TCCTTAGGCCGTTCCCTTAGAGGCTACTTGAAGATCTGTCAAGATGTGAAAGATCGAAGAC  
 BrC4H-2 (689) TCCTCAGGCCGTTCTTAGAGGCTACTTGAAGATCTGCCAGGATGTGAAAGATCGAAGAT  
 BrC4H-3 (689) TCCTCAGGCCGTTCTTAGAGGCTACTTGAAGATCTGTCAAGATGTGAAAGATAGGAGAC

BrC4H-4 (689) TCCTTAGGCCGTTCCCTTAGAGGCTATTTGAAGAGCTGCCAAGATGTGAAAGAGAGAAGAC  
 BrC4H-5 (689) TCCTTAGGCCGTTCCCTTAGAGGCTACTTGAGGATCTGTCAGGATGTGAAAGACAGAAGAT  
 BoC4H-1 (689) TCCTTAGGCCGTTCCCTTAGAGGCTATTTGAAGATCTGCCAAGATGTGAAAGAGAGAAGAC  
 BoC4H-2 (689) TCCTTAGGCCCTTCCCTTAGAGGCTACTTGAAGATCTGTCAGGATGTGAAAGACAGAAGAC  
 BoC4H-3 (689) TCCTTAGGCCGTTCCCTTAGAGGCTACTTGAAGATCTGTCAGGATGTGAAAGATCGAAGAC  
 BoC4H-4 (689) TCCTCAGGCCGTTCTTAGAGGGTATTTGAAGATCTGCCAGGATGTGAAAGACCGAAGAT  
 BoC4H-5 (689) TCCTTAGGCCGTTCTTAGAGGCTACTTGAAGATTTGTCAAGATGTGAAAGATCGGAGAC

AtC4H (749) TCGCTCTTTTCAAGAAGTACTTTGTTGATGAGAGGAAGCAAATTCGAGTTCTAAGCCTA  
 BnC4HA (842) TCGCGTATTCAAGAAGTACTTTGTTGATGAGAGGAAGCAAATTCGCGAGTTCCAAGCCTA  
 BnC4HB (844) TATCGCTTTTCAAGAAGTACTTTGTTGATGAGAGGAAGCAGATTTCGAGCTCTAAGCCTA  
 Br-cr-C4HL (838) TCGCGCTCTTCAAGAAGTACTTTGTTGACGAGAGGAAGCAAATTCGCGAGTTCCAAGCCTA  
 BrA-C4HL (836) TCGCGCTCTTCAAGAAGTACTTTGTTGACGAGAGGAAGCAAATTCGCGAGTTGGAAGCCTA  
 Br-sk-C4HL (836) TCGCGCTCTTCAAGAAGTACTTTGTTGACGAGAGGAAGCAAATTCGCGAGTTGGAAGCCTA  
 BcCyp450\_C4H (898) TCGCGCTCTTCAAGAAGTACTTTGTTGACGAGAGGAAGCAAATTCGCGAGTTGGAAGCCTA  
 BrC4H(DQ457008) (837) TAGCGCTCTTCAAGAAGTACTTTGTTGACGAGAGGAAGCAAATTCGCGAGTTCCAAGCCTA  
 BrC4H-1 (749) TCGCGCTCTTCAAGAAGTACTTTGTTGACGAGAGGAAGCAAATTCGCGAGTTGGAAGCCTA  
 BrC4H-2 (749) TTGCGCTCTTCAAGAAGTACTTTGTTGACGACAGGAAGCAAATTCGCGAGTTGGAAGCCTA  
 BrC4H-3 (749) TGTGCTTTTCAAGAAGTACTTTCGTTGAGGAGAGGAAGCAGATTTCGCGCTCTAAGCCTA  
 BrC4H-4 (749) TAGCGCTCTTCAAGAAGTACTTTGTTGACGAGAGGAAGGAGATTTCGAGTGCTAAGCCTA  
 BrC4H-5 (749) TAGCTCTCTTGAAGAAGTACTTTGTTGACGAGAGGAAGCAAATTCGCAAGTTCCAAGCCTA  
 BoC4H-1 (749) TAGCGCTCTTCAAGAAGTACTTTGTTGACGAGAGGAAGGAGATTTCGAGTGCTAAGCCTA  
 BoC4H-2 (749) TAGCTCTCTTGAAGAAGTACTTTGTTGACGAGAGGAAGCAAATTCGCGAGTTCTAAGCCTA  
 BoC4H-3 (749) TCGCGTATTCAAGAAGTACTTTGTTGATGAGAGGAAGCAAATTCGCGAGTTCCAAGCCTA  
 BoC4H-4 (749) TTGCGCTCTTCAAGAAGTACTTTGTTGACGACAGGAAGCAAATTCGCGAGTTCCAAGCCTA  
 BoC4H-5 (749) TATCGCTTTTCAAGAAGTACTTTCGTTGAGGAGAGGAAGCAGATTTCGAGCTCTAAGCCTA

AtC4H (809) CAGGTAGTGAAGGATTGAAATGTGCCATTGATCACATCCTTGAAGTGAAGCAGAGGGAG  
 BnC4HA (902) CAGGAAGCGAAGGATTGAAATGCGCCATCGATCACATCCTTGTGTGCTCAACAGAAGGGAG  
 BnC4HB (904) **CGGTAGCGAGGGTTAAAAAT**GCGCCATTGATCACATCTTGTGCTCAACAGAAGGGGG  
 Br-cr-C4HL (898) CAGGAAGCGAAGGATTGAAATGCGCTATTGATCACATCCTTGAAGCTCAACAGAAGGGTG  
 BrA-C4HL (896) CAGGAAGCGAAGGATTGAAATGCGCTATTGATCACATCCTTGAAGCTCAACAGAAGGGTG  
 Br-sk-C4HL (896) CAGGAAGCGAAGGATTGAAATGCGCTATTGATCACATCCTTGAAGCTCAACAGAAGGGTG  
 BcCyp450\_C4H (958) CAGGAAGCGAAGGATTGAAATGCGCTATTGATCACATCCTTGAAGCTCAACAGAAGGGTG  
 BrC4H(DQ457008) (897) CAGGAAGCGAAGGATTGAAATGCGCTATTGATCACATCCTTGAAGCTCAACAGAAGGGTG  
 BrC4H-1 (809) CAGGAAGCGAAGGATTGAAATGCGCTATTGATCACATCCTTGAAGCTCAACAGAAGGGTG  
 BrC4H-2 (809) CAGGAGGTGGAGGATTGAAATGCGCCATTGATCACATCCTTGAAGCTCAAAAGAAGGGAG  
 BrC4H-3 (809) CGGGTAGCGAAGGGTTGAAATGCGCCATTGATCATATCCTTGTGCTCAACAGAAGGGGG  
 BrC4H-4 (809) CGGGAGCG-----TGAAATACGCCATTGATCACATCCTTGAAGCTGAAGAGAAGGGAG  
 BrC4H-5 (809) CAGGAAGCGAAGGATTGAAATGCGCCATTGATCATATCATTGAAGCTCAACAGAAGGGAG  
 BoC4H-1 (809) CGGGAGCG-----TGAAATACGCCATTGATCACATCCTTGAAGCTGAAGAGAAGGGAG  
 BoC4H-2 (809) CAGGAAGCGAAGGACTGAAATGCGCCATTGATCATATCGTTGAAGCACAAACAGAAGGGAG  
 BoC4H-3 (809) CAGGAAGCGAAGGATTGAAATGCGCCATTGATCACATCCTTGAAGCTCAACAGAAGGGAG  
 BoC4H-4 (809) CAGGAGTTGGAGGATTGAAATGCGCCATTGATCACATCCTTGAAGCTCAAAACAAGGGAG  
 BoC4H-5 (809) CGGGTAGCGAGGGTTGAAATGTGCCATCGATCACATCTTGTGCTCAACAGAAGGGGG

AtC4H (869) AAATCAACGAGGACAACGTTCTTTTACATCGTTCGAGAACATCAATGTCGCGCGATTGAGA  
 BnC4HA (962) AGATCAACGAGGACAACGTTCTTTTACATCGTTGAGAACATCAATGTCGCTGCTATTGAGA  
 BnC4HB (964) AGATCAATGAGGACAACGTTCTTTTACATCGTTGAGAACATTAATGTCGCTGCGATTGAGA  
 Br-cr-C4HL (958) AGATCAACGAGGACAACGTTCTTTTACATCGTTGAGAACATCAATGTCGCTGCTATTGAGA  
 BrA-C4HL (956) AGATCAACGAGGACAACGTTCTTTTACATCGTTGAGAACATCAATGTCGCTGCTATTGAGA  
 Br-sk-C4HL (956) AGATCAACGAGGACAACGTTCTTTTACATCGTTGAGAACATCAATGTCGCTGCTATTGAGA  
 BcCyp450\_C4H (1018) AGATCAACGAGGACAACGTTCTTTTACATCGTTGAGAACATCAATGTCGCTGCTATTGAGA  
 BrC4H(DQ457008) (957) AGATCAACGAGGACAACGTTCTTTTACATCGTTGAGAACATCAATGTCGCTGCTATTGAGA  
 BrC4H-1 (869) AGATCAACGAGGACAACGTTCTTTTACATCGTTGAGAACATCAATGTCGCTGCTATTGAGA  
 BrC4H-2 (869) AAATCAACGAGGATAACGTTCTTTTACATCGTTGAGAACATCAATGTCGCTGCGATTGAGA  
 BrC4H-3 (869) AGATTAATGAGGACAACGTTCTTTTACATCGTTGAGAACATTAATGTCGCTGCGATTGAGA  
 BrC4H-4 (863) AAATCAATGCGGACAACGTTCTTTTATATCGTTCGAGAACATCAACGTAGCTGCTATTGAGA  
 BrC4H-5 (869) AGATCAACGAGGACAACGTTCTTTTACATCGTTCGAGAACATCAATGTCGCTGCTATTGAGA  
 BoC4H-1 (863) AAATCAATGCGGACAACGTTCTTTTATATCGTTCGAGAACATCAACGTAGCTGCTATTGAGA  
 BoC4H-2 (869) AGATCAACGAGGACAACGTTCTTTTACATCGTTCGAGAACATCAATGTCGCTGCTATTGAGA  
 BoC4H-3 (869) AGATCAACGAGGACAACGTTCTTTTACATCGTTGAGAACATCAATGTCGCTGCTATTGAGA  
 BoC4H-4 (869) AAATCAATGAGGACAACGTTCTTTTACATCGTTGAGAACATCAATGTCGCTGCGATTGAGA

BoC4H-5 (869) AGATCAATGAGGACAACGTTCTTTACATTGTTGAGAACATTAATGTCGCTGCGATTGAGA  
  
 AtC4H (929) CAACATTGTGGTCTATCGAGTGGGGAATTGCAGAGCTAGTGAACCATCCTGAAATCCAGA  
 BnC4HA (1022) **CAACATTGTGGTCCATCGAATG**GGGAATTGCGGAGCTAGTGAACCATCCTGAGATCCAAA  
 BnC4HB (1024) CAACATTGTGGTCCATCGAATGGGGAGTTGCGGAGCTAGTGAACCATCCTGAGATCCAAA  
 Br-cr-C4HL (1018) CAACATTATGGTCCATCGAATGGGGAATTGCGGAGCTAGTGAACCATCCAGAGATCCAGA  
 BrA-C4HL (1016) CAACATTATGGTCCATCGAATGGGGAATTGCGGAGCTAGTGAACCATCCAGAGATCCAGA  
 Br-sk-C4HL (1016) CAACATTATGGTCCATCGAATGGGGAATTGCGGAGCTAGTGAACCATCCAGAGATCCAGA  
 BcCyp450\_C4H (1078) CAACATTATGGTCCATCGAATGGGGAATTGCGGAGCTAGTGAACCATCCAGAGATCCAGA  
 BrC4H(DQ457008) (1017) CAACATTATGGTCCATCGAATGGGGAATTGCGGAGCTAGTGAACCATCCAGAGATCCAGA  
 BrC4H-1 (929) CAACATTATGGTCCATCGAATGGGGAATTGCGGAGCTAGTGAACCATCCAGAGATCCAGA  
 BrC4H-2 (929) CAACACTAACGTCTATGGAGTGGGGAATAGCAGAGCTAGTGAACCATCCTGAAATCCAGA  
 BrC4H-3 (929) CAACATTGTGGTCCATCGAATGGGGAGTTGCGGAGCTAGTGAACCATCCGGAGATCCAAA  
 BrC4H-4 (923) CAACACTATGGTCTATTGAATGGGGAATTGCGGAGCTAGTGAACCATCCTGAGATCCAGA  
 BrC4H-5 (929) CAACATTGTGGTCTATCGAGTGGGGAATAGCGGAGCTAGTGAACCATCCTGAGATCCAGA  
 BoC4H-1 (923) CAACACTATGGTCTATTGAATGGGGAATTGCGGAGCTAGTGAACCATCCTGAGATCCAGA  
 BoC4H-2 (929) CAACACTGTGGTCTATCGAGTGGGGAATGCGGAGCTAGTGAACCATCCTGAGATCCAGA  
 BoC4H-3 (929) CAACATTGTGGTCCATCGAATGGGGAATTGCGGAGCTAGTGAACCATCCAGAGATCCAAA  
 BoC4H-4 (929) CAACACTAACGTCTATGGAGTGGGGAATAGCAGAGCTAGTGAACCATCCTGATATCCAGA  
 BoC4H-5 (929) CAACATTGTGGTCCATCGAATGGGGAGTTGCGGAGCTAGTGAACCATCCTGAGATCCAAA  
  
 AtC4H (989) GTAAGCTAAGGAACGAACTCGACACAGTTCTTGGACC GGGTGTGCAAGTCACCGAGCCTG  
 BnC4HA (1082) GCAAGCTAAGGAACGAAATCGACACGGTTCTTGGACCAGGAGTTCAAGTCACGGAGCCTG  
 BnC4HB (1084) CCAAGCTAAGGAACGAAATCGACACGGTTCTTGGACCAGGCGTCAAGTCACAGAGCCTG  
 Br-cr-C4HL (1078) CCAAGCTAAGGAACGAAATCGACACGGTTCTTGGACCAGGAGTTCAAGTCACGGAGCCTG  
 BrA-C4HL (1076) CCAAGCTAAGGAACGAAATCGACACGGTTCTTGGACCAGGAGTTCAAGTCACGGAGCCTG  
 Br-sk-C4HL (1076) CCAAGCTAAGGAACGAAATCGACACGGTTCTTGGACCAGGAGTTCAAGTCACGGAGCCTG  
 BcCyp450\_C4H (1138) CCAAGCTAAGGAACGAAATCGACACGGTTCTTGGACCAGGAGTTCAAGTCACGGAGCCTG  
 BrC4H(DQ457008) (1077) CCAAGCTAAGGAACGAAATCGACACGGTTCTTGGACCAGGAGTTCAAGTCACGGAGCCTG  
 BrC4H-1 (989) CCAAGCTAAGGAACGAAATCGACACGGTTCTTGGACCAGGAGTTCAAGTCACGGAGCCTG  
 BrC4H-2 (989) GCAAGCTAAGGAACGAAATCGACACGGTTCTTGGACCAGGCGTGCATGTCAACGGAGCCTG  
 BrC4H-3 (989) CCAAGCTAAGGAACGAAATCGACACGGTTCTTGGACCAGGCGTGCAGTCAACGGAGCCTG  
 BrC4H-4 (983) GCAAGCTAAGGAACGAAATCGACACGGTTCTTGGACCAGGCGTGCAGTCAACAGAGCCTG  
 BrC4H-5 (989) GCAAGCTAAGGAACGAAATCGATACGGTTCTTGGACCAGGCGTTCAAATCACAGAGCCTG  
 BoC4H-1 (983) GCAAGCTAAGGAACGAAATCGACACGGTTCTTGGACCAGGCGTGCAGTCAACAGAGCCTG  
 BoC4H-2 (989) GCAAGCTAAGGAACGAGATCGACACGGTTCTTGGACCAGGAGTTCAAATCACAGAGCCTG  
 BoC4H-3 (989) GCAAGCTAAGGAACGAAATCGACACGGTTCTTGGACCAGGAGTTCAAGTCACGGAGCCTG  
 BoC4H-4 (989) GCAAGCTAAGGAACGAAATCGACACGGTTCTTGGACTAGGCGTGCAGTCAACGGAGCCTG  
 BoC4H-5 (989) CCAAGCTAAGGAACGAAATCGACACGGTTCTTGGACCAGGCGTGCAGTCAACAGAGCCTG  
  
 AtC4H (1049) ATCTTCACAACTTCCATACCTTCAAGCTGTGGTTAAGGAGACTCTTCGTCTGAGAATGG  
 BnC4HA (1142) AGCTTCACAAGCTTCCATATCTCCAAGCCGTGATCAAGGAAACACTTCGTCTAAGAATGG  
 BnC4HB (1144) AGCTTCACAAGCTTCCATACCTCCAAGCCGTGATCAAGGAGACGCTTCGACTAAGAATGG  
 Br-cr-C4HL (1138) AGCTTCACAAGCTTCCATACCTCCAAGCCGTGATCAAGGAAACGCTTCGTCTAAGAATGG  
 BrA-C4HL (1136) AGCTTCACAAGCTTCCATACCTCCAAGCCGTGATCAAGGAAACGCTTCGTCTAAGAATGG  
 Br-sk-C4HL (1136) AGCTTCACAAGCTTCCATACCTCCAAGCCGTGATCGAGGAAACGCTTCGTCTAAGAATGG  
 BcCyp450\_C4H (1198) AGCTTCACAAGCTTCCATACCTCCAAGCCGTGATCAAGGAAACGCTTCGTCTAAGAATGG  
 BrC4H(DQ457008) (1137) AGCTTCACAAGCTTCCATACCTCCAAGCCGTGATCAAGGAAACGCTTCGTCTAAGAATGG  
 BrC4H-1 (1049) AGCTTCACAAGCTTCCATACCTCCAAGCCGTGATCAAGGAAACGCTTCGTCTAAGAATGG  
 BrC4H-2 (1049) CGCTTCACAAGCTTCCGTACCTCCAAGCTGTGATAAAAGAGACCATCCGTAGAAGAATGG  
 BrC4H-3 (1049) AGCTTCACAAGCTTCCATACCTCCAAGCCGTGATCAAGGAGACGCTTCGACTAAGAATGG  
 BrC4H-4 (1043) ACCTTCACAAGCTTCCATACCTCCAAGTCGTGCTCAAGGAGACACTTCGTCTAAGAATGG  
 BrC4H-5 (1049) AGCTGCACAAGCTTCCCTACCTCCAAGCCGTGATCAAGGAGACGCTTAGACTAAGAATGG  
 BoC4H-1 (1043) GCCTTCACAAGCTTCCATACCTCCAAGCCGTGCTCAAGGAGACACTTCGTCTAAGAATGG  
 BoC4H-2 (1049) AGCTACACAAGCTTCCCTACCTCCAAGCAGTGATCAAGGAGACGCTTCGACTAAGAATGG  
 BoC4H-3 (1049) AGCTTCACAAGCTTCCATACCTCCAAGCCGTGATCAAGGAAACACTTCGTCTAAGAATGG  
 BoC4H-4 (1049) AGCTTCACAGGCTTCCATACCTCCAAGCTGTGATCAAGGAGACAATCCGTAGAAGAATGG  
 BoC4H-5 (1049) AGCTTCACAAGCTTCCATACCTCCAAGCCGTGATCAAGGAGACACTTCGACTAAGAATGG  
  
 AtC4H (1109) CGATTCTCTCCTCGTGCTCACATGAACCTCCATGATGCGAAGCTCGCTGGCTACGATA  
 BnC4HA (1202) CTATTCTCTCCTCGTCCCTCACATGAACCTCAACGACGCTAAGCTCGCTGGCTACGACA  
 BnC4HB (1204) CTATTCCCCTCCTAGTCCCTCACATGAACCTCAACGACGCTAAGCTCGCCGGCTACGATA  
 Br-cr-C4HL (1198) CTATTCTCTCCTCGTCCCTCACATGAACCTCAACGACGCTAAGCTCGCTGGCTACGACA



BrA-C4HL (1196) CTATTCTCTCCTCGTCCCTCACATGAACCTCAACGACGCTAAGCTTGCTGGCTACGACA  
Br-sk-C4HL (1196) CTATTCTCTCCTCGTCCCTCACATGAACCTCAACGACGCTAAGCTTGCTGGCTACGACA  
BcCyp450\_C4H (1258) CTATTCTCTCCTCGTCCCTCACATGAACCTCAACGACGCTAAGCTTGCTGGCTACGACA  
BrC4H(DQ457008) (1197) CTATTCTCTCCTCGTCCCTCACATGAACCTCAACGACGCTAAGCTTGCTGGCTACGACA  
BrC4H-1 (1109) CTATTCTCTCCTCGTCCCTCACATGAACCTCAACGACGCTAAGCTTGCTGGCTACGACA  
BrC4H-2 (1109) CTGTTCTCTCCTCGTCCCTCACATGAACCTCAACGACGCTAAGCTTGCTGGCTACGACA  
BrC4H-3 (1109) CTATTCCCTCCTAGTCCCTCACATGAACCTCAACGACGCTAAGCTTGCTGGCTACGATA  
BrC4H-4 (1103) GTGTACCACTCCTCGTACCACACATGAACCTCAAGGACGCTAAGCTTGCTGGCTACGACA  
BrC4H-5 (1109) CTATACCTCTCCTTGTCACACATGAACCTCAACGACGCTAAGCTTGCTGGCTACGACA  
BoC4H-1 (1103) GTGTACCACTCCTCGTACCACACATGAACCTCAAGGACGCTAAGCTTGCTGGCTACGATA  
BoC4H-2 (1109) CTATACCTCTCCTTGTCACACATGAACCTCAACGACGCTAAGCTTGCTGGCTACGACA  
BoC4H-3 (1109) CTATTCTCTCCTCGTCCCTCACATGAACCTCAACGACGCTAAGCTTGCTGGCTACGACA  
BoC4H-4 (1109) CTGTTCTCTCCTCGTCCCTCACATGAACCTCAACGACGCTAAGCTTGCTGGCTACGACA  
BoC4H-5 (1109) CTATTCCCTCCTAGTCCCTCACATGAACCTCAACGACGCTAAGCTTGCTGGCTACGATA

AtC4H (1169) TCCCAGCAGAAAGCAAAATCCTTGTAAATGCTTGGTGGCTAGCAAACAACCCAAACAGCT  
BnC4HA (1262) TCCCAGCGAAAGCAAGATCCTGGTCAATGCCTGGTGGCTAGCGAAACAACCTGAGAGCT  
BnC4HB (1264) TCCCAGCGAAAGCAAGATCCTGGTCAATGCCTGGTGGCTAGCGAAACAACCTGAGAGCT  
Br-cr-C4HL (1258) TCCCAGCGAAAGCAAGATCCTGGTCAACGCCTGGTGGCTAGCGAAACAACCTGAGAGCT  
BrA-C4HL (1256) TCCCAGCGAAAGCAAGATCCTGGTCAACGCCTGGTGGCTAGCGAAACAACCTGAGAGCT  
Br-sk-C4HL (1256) TCCCAGCGAAAGCAAGATCCTGGTCAACGCCTGGTGGCTAGCGAAACAACCTGAGAGCT  
BcCyp450\_C4H (1318) TCCCAGCGAAAGCAAGATCCTGGTCAACGCCTGGTGGCTAGCGAAACAACCTGAGAGCT  
BrC4H(DQ457008) (1257) TCCCAGCGAAAGCAAGATCCTGGTCAACGCCTGGTGGCTAGCGAAACAACCTGAGAGCT  
BrC4H-1 (1169) TCCCAGCGAAAGCAAGATCCTGGTCAACGCCTGGTGGCTAGCGAAACAACCTGAGAGCT  
BrC4H-2 (1169) TCCCAGCAGAAAGCAGAATCTTGATCAATGCCTGGTGGCTAGCGAAACAACCTGAGAGCT  
BrC4H-3 (1169) TCCCAGCGAAAGCAAGATCCTTGTCATGCCTGGTGGCTAGCGAAACAACCTGAGAGCT  
BrC4H-4 (1163) TCCCAGCAGAAAGCAAAATCCTGGTCAATGCATGGTGGCTAGCGAAACAACCTGAGAGCT  
BrC4H-5 (1169) TCCCAGCGAAAGCAAGATCCTGGTCAATGCCTGGTGGCTAGCGAAACAACCTGAGAGCT  
BoC4H-1 (1163) TCCCAGCAGAAAGCAAAATCCTGGTCAATGCCTGGTGGCTAGCGAAACAACCTGAGAGCT  
BoC4H-2 (1169) TCCCAGCGAAAGCAAGATCCTGGTCAATGCCTGGTGGCTAGCGAAACAACCTGAGAGCT  
BoC4H-3 (1169) TCCCAGCGAAAGCAAGATCCTGGTCAATGCCTGGTGGCTAGCGAAACAACCTGAGAGCT  
BoC4H-4 (1169) TCCCAGAAAGCAAGATCCTTGATCAATGCCTGGTGGCTAGCGAAACAACCTGAGAGCT  
BoC4H-5 (1169) TCCCAGCGAAAGCAAGATCCTGGTCAATGCCTGGTGGCTAGCGAAACAACCTGAGAGCT

AtC4H (1229) GGAAGAAGCCTGAAGAGTTTAGACCAGAGAGGTTCTTTGAAGAAGAAATCGCACGTGGAAG  
BnC4HA (1322) GGAAGAAGCCTGAAGAGTTTAGGCCCGAGAGATTTCTTTGAAGAAGAGGCACACGTGGAAG  
BnC4HB (1324) GGAAGAAGCCTGAAGAGTTTAGACCAGAGAGGTTCTTTGAAGAAGAGGCACACGTGGAAG  
Br-cr-C4HL (1318) GGAAGAAGCCTGAAGAGTTTAGGCCCGAGAGGTTCTTTGAAGAAGAGGCACACGTGGAAG  
BrA-C4HL (1316) GGAAGAAGCCTGAAGAGTTTAGGCCCGAGAGGTTCTTTGAAGAAGAGGCACACGTGGAAG  
Br-sk-C4HL (1316) GGAAGAAGCCTGAAGAGTTTAGGCCCGAGAGGTTCTTTGAAGAAGAGGCACACGTGGAAG  
BcCyp450\_C4H (1378) GGAAGAAGCCTGAAGAGTTTAGGCCCGAGAGGTTCTTTGAAGAAGAGGCACACGTGGAAG  
BrC4H(DQ457008) (1317) GGAAGAAGCCTGAAGAGTTTAGGCCCGAGAGGTTCTTTGAAGAAGAGGCACACGTGGAAG  
BrC4H-1 (1229) GGAAGAAGCCTGAAGAGTTTAGGCCCGAGAGGTTCTTTGAAGAAGAGGCACACGTGGAAG  
BrC4H-2 (1229) GGAATTCGCCTGAAGAGTTTAGACCAGAGGTTCTCGAAGAAGAGGCACACGTGGAAG  
BrC4H-3 (1229) GGAAGAAGCCTGAAGAGTTTAGACCAGAGAGGTTCTTTGAAGAAGAGGCACACGTGGAAG  
BrC4H-4 (1223) GGAAGAAACCTGAAGAGTTTAGGCCCGAGAGGTTCTTTGAAGAAGAGGCACACGTGGAAG  
BrC4H-5 (1229) GGAAGAAACCTGAAGAGTTTAGGCCCGAGAGGTTCTTTGAAGAAGAGGCACACGTGGAAG  
BoC4H-1 (1223) GGAAGAAACCTGAAGAGTTTAGGCCCGAGAGGTTCTTTGAAGAAGAGGCACACGTGGAAG  
BoC4H-2 (1229) GGAAGAAGCCTGAAGAGTTTAGACCAGAGGTTCTTTGAAGAAGAGGCACACGTGGAAG  
BoC4H-3 (1229) GGAAGAAGCCTGAAGAGTTTAGGCCCGAGAGGTTCTTTGAAGAAGAGGCACACGTGGAAG  
BoC4H-4 (1229) GGAATTCGCCTGAAGAGTTTAGACCAGAGGTTCTCGAAGAAGAGGCACACGTGGAAG  
BoC4H-5 (1229) GGGAGAAGCCTGAAGAGTTTAGACCAGAGGTTCTTTGAAGAAGAGGCACACGTGGAAG

AtC4H (1289) CTAACGGTAATGACTTCAGGTATGTGCCATTTGGTGTGGACGTCGAAGCTGTCCGGGA  
BnC4HA (1382) CGAACGGTAATGACTTTAAGTATGTGCCGTTTGGTGTGGACGTAGAAGCTGTCCGGGA  
BnC4HB (1384) CCAACGGTAATGACTTTAGGTATGTGCCGTTTGGTGTGGACGTAGAAGCTGTCCGGGA  
Br-cr-C4HL (1378) CGAACGGTAATGACTTTAGGTATGTGCCGTTTGGTGTGGACGTAGAAGCTGTCCGGGA  
BrA-C4HL (1376) CGAACGGTAATGACTTTAGGTATGTGCCGTTTGGTGTGGACGTAGAAGCTGTCCGGGA  
Br-sk-C4HL (1376) CGAACGGTAATGACTTTAGGTATGTGCCGTTTGGTGTGGACGTAGAAGCTGTCCGGGA  
BcCyp450\_C4H (1438) CGAACGGTAATGACTTTAGGTATGTGCCGTTTGGTGTGGACGTAGAAGCTGTCCGGGA  
BrC4H(DQ457008) (1377) CGAACGGTAATGACTTTAGGTATGTGCCGTTTGGTGTGGACGTAGAAGCTGTCCGGGA  
BrC4H-1 (1289) CGAACGGTAATGACTTTAGGTATGTGCCGTTTGGTGTGGACGTAGAAGCTGTCCGGGA  
BrC4H-2 (1289) CAAACGGTAATGACTTCAGGTATGTACCGTTTGGTGTGGACGTAGAAGCTGTCCGGGA

BrC4H-3 (1289) CCAATGGTAACGACTTTAGGGATGTGCCGTTTGGTGTGGACGTAGAAGCTGTCCAGGGA  
 BrC4H-4 (1283) CAAACGGTAACGACTTCAGGTAAGTGTGCCGTTTGGTCTTGGACGTAGAAGCTGTCCAGGGA  
 BrC4H-5 (1289) CCAATGGTAATGACTTCAGGTAATGTGCCGTTTGGTGTGGACGTAGAAGCTGTCCAGGGA  
 BoC4H-1 (1283) CAAACGGTAACGACTTCAGGTAAGTGTGCCGTTTGGTGTGGACGTAGAAGCTGTCCAGGGA  
 BoC4H-2 (1289) CCAATGGTAATGACTTCAGGTAATGTGCCGTTTGGTGTGGACGTAGAAGCTGTCCAGGGA  
 BoC4H-3 (1289) CGAACGGTAATGACTTTAAGTAATGTGCCGTTTGGTGTGGACGTAGAAGCTGTCCAGGGA  
 BoC4H-4 (1289) CAAACGGTAATGACTTCAGGTAATGTGCCGTTTGGTGTGGACGTAGAAGCTGTCCAGGGA  
 BoC4H-5 (1289) CCAATGGTAACGACTTTAGGTAATGTGCCGTTTGGTGTGGGCGTAGAAGCTGTCCAGGGA  
  
 AtC4H (1349) TTATATTGGCATTGCCTATTTTGGGATCACCATTGGTAGGATGGTCCAGAACTTCGAGC  
 BnC4HA (1442) TTATATTGGCGTTGCCCTATTTTGGGAATCACGATTGGTAGGTTGGTCCAGAACTTCGAGC  
 BnC4HB (1444) TTATATTGGCGTTGCCCTATTTTGGGAATCACTATTGGTAGGTTGGTCCAAAACCTTCGAGC  
 Br-cr-C4HL (1438) TTATATTGGCGTTGCCCTATTTTGGGAATCACGATTGGTAGGATGGTACAGAACTTCGAGC  
 BrA-C4HL (1436) TTATATTGGCGTTGCCCTATTTTGGGAATCACGATTGGTAGGATGGTACAGAACTTCGAGC  
 Br-sk-C4HL (1436) TTATATTGGCGTTGCCCTATTTTGGGAATCACGATTGGTAGGATGGTACAGAACTTCGAGC  
 BcCyp450\_C4H (1498) TTATATTGGCGTTGCCCTATTTTGGGAATCACGATTGGTAGGATGGTACAGAACTTCGAGC  
 BrC4H(DQ457008) (1437) TTATATTGGCGTTGCCCTATTTTGGGAATCACGATTGGTAGGATGGTCCAGAACTTCGAGC  
 BrC4H-1 (1349) TTATATTGGCGTTGCCCTATTTTGGGAATCACGATTGGTAGGATGGTCCAGAACTTCGAGC  
 BrC4H-2 (1349) TTATATTGGCGTTGCCCTATTTTGGGAATCACGATTGGTAGGATGGTCCAGAACTTCGAGC  
 BrC4H-3 (1349) TTATATTGGCGTTGCCCTATTTTGGGAATCACGATTGGTAGGATGGTCCAAAACCTTCGAGC  
 BrC4H-4 (1343) TTGTAAGTACGATTGCCCTATTTTGGGAATCACGATTGGTAGGATGGTACAAAACCTTCGAGC  
 BrC4H-5 (1349) TTATATTGGCGTTGCCCTATTTTGGGAATCACTATCGTAGGTTGGTACAGAACTTCGAGC  
 BoC4H-1 (1343) TTGTAAGTACGATTGCCCTATTTTGGGAATCACGATTGGTAGGATGGTACAGAACTTCGAG-  
 BoC4H-2 (1349) TTATATTGGCGTTGCCCTATTTTGGGAATCACGATTGGTAGGTTGGTACAGAACTTCGAGC  
 BoC4H-3 (1349) TTATATTGGCGTTGCCCTATTTTGGGAATCACGATTGGTAGGTTGGTCCAGAACTTCGAGC  
 BoC4H-4 (1349) TTATATTGGCGTTGCCCTATTTTGGGAATCACGATTGGTAGGTTGGTCCAGAACTTCGAGC  
 BoC4H-5 (1349) TTATATTGGCGTTGCCCTATTTTGGGAATCACTATTGGTAGGTTGGTCCAAAACCTTCGAGC  
  
 AtC4H (1409) TTCCTCCTCCTCCAGGACAGTCTAAAAGTGGATACTAGTGAGAAAGGTGGACAATTCAGCT  
 BnC4HA (1502) TTCCTCCTCCTCCGGGACAGTCTAAAAGTGGATACTTCTGAGAAAGGTGGACAGTTTCAGCT  
 BnC4HB (1504) TACTTCCTCCTCCGGGACAGTCTAAAAGTGGATACTTCTGAGAAAGGTGGACAGTTTCAGCT  
 Br-cr-C4HL (1498) TTCCTCCTCCTCCAGGACAGTCTAAAAGTGGATACTTCTGAGAAAGGTGGACAGTTTCAGCT  
 BrA-C4HL (1496) TTCCTCCTCCTCCAGGACAGTCTAAAAGTGGATACTTCTGAGAAAGGTGGACAGTTTCAGCT  
 Br-sk-C4HL (1496) TTCCTCCTCCTCCAGGACAGTCTAAAAGTGGATACTTCTGAGAAAGGTGGACAGTTTCAGCT  
 BcCyp450\_C4H (1558) TTCCTCCTCCTCCAGGACAGTCTAAAAGTGGATACTTCTGAGAAAGGTGGACAGTTTCAGCT  
 BrC4H(DQ457008) (1497) TTCCTCCTCCTCCGGGACAGTCTAAAAGTGGATACTTCTGAGAAAGGTGGACAGTTTCAGCT  
 BrC4H-1 (1409) TTCCTCCTCCTCCAGGACAGTCTAAAAGTGGATACTTCTGAGAAAGGTGGACAGTTTCAGCT  
 BrC4H-2 (1409) TACTTCCTCCTCCGGGACAGTCTAAAAGTGGATACTTCTGAGAAAGGTGGACAGTTTCAGCT  
 BrC4H-3 (1409) TACTTCCTCCTCCGGGACAGTCTAAAAGTGGATACTTCTGAGAAAGGTGGACAGTTTCAGCT  
 BrC4H-4 (1403) TTTTTCCTCCTCCGGGACAGTCTAAAAGTGGATACTTCTGAGAAAGGTGGACAGTTTCAGCC  
 BrC4H-5 (1409) TACTTCCTCCTCCAGGACAGTCTAAAAGTGGATACTTCTGAGAAAGGTGGACAGTTTCAGCT  
 BoC4H-1 (1402) TTTTTCCTCCTCCGGGACAGTCTAAAAGTGGATACTTCTGAGAAAGGTGGACAGTTTCAGCT  
 BoC4H-2 (1409) TTCCTCCTCCTCCAGGACAGTCTAAAAGTGGATACTTCTGAGAAAGGTGGACAGTTTCAGCT  
 BoC4H-3 (1409) TTCCTCCTCCTCCGGGACAGTCTAAAAGTGGATACTTCTGAGAAAGGTGGACAGTTTCAGCT  
 BoC4H-4 (1409) TTCCTCCTCCTCCGGGACAGTCTAAAAGTGGATACTTCTGAGAAAGGTGGACAGTTTCAGCT  
 BoC4H-5 (1409) TACTTCCTCCTCCGGGACAGTCTAAAAGTGGATACTTCTGAGAAAGGTGGACAGTTTCAGCT  
  
 AtC4H (1469) TGCACATCCTTAACCACTCCATAATCGTTATGAAACCAAGGAAGCTTTAA-----  
 BnC4HA (1562) TGCACATCCTTACCATTCCACCATCGTAATGAAGCAAGGTCCTTTAA-----AAT  
 BnC4HB (1564) TGCACATCCTAAACCACTCAACAATCGTAATGAAGCAAGGACCAATTTGA-----ATT  
 Br-cr-C4HL (1558) TGCACATCCTTACCATTCCACCATCGTAATGAAGCAAGGTCCTTTAA-----AAT  
 BrA-C4HL (1556) TGCACATCCTTACCATTCCACCATCGTAATGAAGCAAGGTCCTTTAA-----AAT  
 Br-sk-C4HL (1556) TGCACATCCTTACCATTCCACCATCGTAATGAAGCAAGGTCCTTTAA-----A-T  
 BcCyp450\_C4H (1618) TGCACATCCTTACCATTCCACCATCGTAATGAAGCAAGGTCCTTTAA-----AAT  
 BrC4H(DQ457008) (1557) TGCAGATCCTTAACCAATCCACAATAGTAATGAAACCAAGGGCCTTCTGAGAAAAGTAAT  
 BrC4H-1 (1469) TGCACATCCTTACCATTCCACCATCGTAATGAAGCAAGG-----  
 BrC4H-2 (1469) TGCAGATCCTTAACCAATCCACAATAGTAATGAAACCAAGG-----  
 BrC4H-3 (1469) TGCACATCCTTAACCACTCCACAATCGTAATGAAGCAAGG-----  
 BrC4H-4 (1463) TGAAGATCCTTAACCACTCCACAATCGTTATGAAACCAAGG-----  
 BrC4H-5 (1469) TGCACATCCTTAACCACTCCACAATGTAATGAAGCAAGG-----  
 BoC4H-1 (1447) -----  
 BoC4H-2 (1469) TGCATATCCTTAACCACTCCACAATGTAATGAAGCAAGG-----  
 BoC4H-3 (1469) TGCACATCCTTACCATTCCACCATCGTAATGAAGCAAGGCAAAAACAA-----TACT

BoC4H-4 (1469) TGCAGATCCTTAACCAATCCACAATAGTAATGAAACCAAGG-----  
 BoC4H-5 (1469) TGCACATCCTTAACCACTCCACAATCGTAATGAAGCCAAGG-----  
  
 AtC4H (1519) -----  
 BnC4HA (1615) GACTTCTGTTTACACTATAGTGATGTTTGTGGAATATTCCACGTTTTTGTTC-GTATTT  
 BnC4HB (1617) TTCTAAATAATAAAGACAAGAAAATATA----AATTCTGCAAAAATGACTTTT-GTAAT-  
 Br-cr-C4HL (1611) GACTTCTGTTTACACTATAGTGATGTTTGTGGAATATTCCATGTT-----  
 BrA-C4HL (1609) GACTTCTTTTTACACTATAGTGATGTTTGTGGAATATTCCATGTT-----  
 Br-sk-C4HL (1608) GACTTCTGTTTACACTATAGTGATGTTTGTGGAATATTCC-----  
 BcCyp450\_C4H (1671) GACTTCTTTTTACACTATAGTGATGTTTGTGGAATATTCCCTGTTTTTGTTC-GTACTA  
 BrC4H(DQ457008) (1617) TTCTGCCAAATGACTTCTTGTATGTGAATGGCATTATAACTATGTTTTTGT-ATAACC  
 BrC4H-1 (1510) -----  
 BrC4H-2 (1510) -----  
 BrC4H-3 (1510) -----  
 BrC4H-4 (1504) -----  
 BrC4H-5 (1510) -----  
 BoC4H-1 (1447) -----  
 BoC4H-2 (1510) -----  
 BoC4H-3 (1523) TTGAGCAGAGGAGACGGCAACAGCATCAGTTCACGGCTGGGTCTGGGAGCTGTAGTAGTG  
 BoC4H-4 (1510) -----  
 BoC4H-5 (1510) -----  
  
 AtC4H (1519) -----  
 BnC4HA (1674) TGTAAGGTGTTTGTGTAAAAAATGGT---TTCGT-TCCAATATTGCAATAACTATTGGT  
 BnC4HB (1671) -G---GATGGTTGTGAGATATGTTG-----AATATTCAATGTGTTGTTTCT  
 Br-cr-C4HL (1656) -----  
 BrA-C4HL (1654) -----  
 Br-sk-C4HL (1648) -----  
 BcCyp450\_C4H (1730) TTTTGTAAAGGTGTTGTGTAAAAATGGAT---T-CGT-TCCAATATCGCAATAACTATTGGT  
 BrC4H(DQ457008) (1676) TGTT-GAATATTGTGTAAAAATGTTGAAGGGTTCGT-TCCATGGTTGCAAGAATAAGTGGT  
 BrC4H-1 (1510) -----  
 BrC4H-2 (1510) -----  
 BrC4H-3 (1510) -----  
 BrC4H-4 (1504) -----  
 BrC4H-5 (1510) -----  
 BoC4H-1 (1447) -----  
 BoC4H-2 (1510) -----  
 BoC4H-3 (1583) ATAGAAACAGTAGTAATCAACACCAATCTTTGGATATTCTCAATTCATCAACTGTGCAA  
 BoC4H-4 (1510) -----  
 BoC4H-5 (1510) -----  
  
 AtC4H (1519) -----  
 BnC4HA (1730) TCCCCTGTTTTGAAAAAAAAAAAAAAAAAAAAAAAA-----  
 BnC4HB (1713) TCGGAAAAAAAAAAAAAAAAAAAAAAAA-----  
 Br-cr-C4HL (1656) -----  
 BrA-C4HL (1654) -----  
 Br-sk-C4HL (1648) -----  
 BcCyp450\_C4H (1785) TCCCCTGTTTTGAAAAAAAAAAAAAAAA-----  
 BrC4H(DQ457008) (1734) -----  
 BrC4H-1 (1510) -----  
 BrC4H-2 (1510) -----  
 BrC4H-3 (1510) -----  
 BrC4H-4 (1504) -----  
 BrC4H-5 (1510) -----  
 BoC4H-1 (1447) -----  
 BoC4H-2 (1510) -----  
 BoC4H-3 (1643) CTCCTGCTACTCCTGAATGCAAACCTTCTCGTCCAGAAGATGTGAAACAAGTAGTGGGAA  
 BoC4H-4 (1510) -----  
 BoC4H-5 (1510) -----  
  
 AtC4H (1519) -----  
 BnC4HA (1768) -----  
 BnC4HB (1740) -----

Br-cr-C4HL (1656) -----  
 BrA-C4HL (1654) -----  
 Br-sk-C4HL (1648) -----  
 BcCyp450\_C4H (1814) -----  
 BrC4H(DQ457008) (1734) -----  
     BrC4H-1 (1510) -----  
     BrC4H-2 (1510) -----  
     BrC4H-3 (1510) -----  
     BrC4H-4 (1504) -----  
     BrC4H-5 (1510) -----  
     BoC4H-1 (1447) -----  
     BoC4H-2 (1510) -----  
     BoC4H-3 (1703) ATCGGGATGCTAGTTTCTACAGTCTGAAGGACAACATTACAGGAGAAGTTCATTTAACAA  
     BoC4H-4 (1510) -----  
     BoC4H-5 (1510) -----

    AtC4H (1519) -----  
     BnC4HA (1768) -----  
     BnC4HB (1740) -----  
 Br-cr-C4HL (1656) -----  
 BrA-C4HL (1654) -----  
 Br-sk-C4HL (1648) -----  
 BcCyp450\_C4H (1814) -----  
 BrC4H(DQ457008) (1734) -----  
     BrC4H-1 (1510) -----  
     BrC4H-2 (1510) -----  
     BrC4H-3 (1510) -----  
     BrC4H-4 (1504) -----  
     BrC4H-5 (1510) -----  
     BoC4H-1 (1447) -----  
     BoC4H-2 (1510) -----  
     BoC4H-3 (1763) TAAAGCAGAACTAGTTTCTCAAAGAGGCAAGATTTTCGCTTAGTCTCCCTGACAACCAGA  
     BoC4H-4 (1510) -----  
     BoC4H-5 (1510) -----

    AtC4H (1519) -----  
     BnC4HA (1768) -----  
     BnC4HB (1740) -----  
 Br-cr-C4HL (1656) -----  
 BrA-C4HL (1654) -----  
 Br-sk-C4HL (1648) -----  
 BcCyp450\_C4H (1814) -----  
 BrC4H(DQ457008) (1734) -----  
     BrC4H-1 (1510) -----  
     BrC4H-2 (1510) -----  
     BrC4H-3 (1510) -----  
     BrC4H-4 (1504) -----  
     BrC4H-5 (1510) -----  
     BoC4H-1 (1447) -----  
     BoC4H-2 (1510) -----  
     BoC4H-3 (1823) CAAATGATTTTAAGAAAGCGAACACAACAGCGGATCTGATGGGCGGCACAGAGCGGAAGT  
     BoC4H-4 (1510) -----  
     BoC4H-5 (1510) -----

    AtC4H (1519) -----  
     BnC4HA (1768) -----  
     BnC4HB (1740) -----  
 Br-cr-C4HL (1656) -----  
 BrA-C4HL (1654) -----  
 Br-sk-C4HL (1648) -----  
 BcCyp450\_C4H (1814) -----  
 BrC4H(DQ457008) (1734) -----  
     BrC4H-1 (1510) -----TCCTTT

```

BrC4H-2 (1510) -----GCCTTCTG
BrC4H-3 (1510) -----ACCTTTTG
BrC4H-4 (1504) -----GCCGTCTG
BrC4H-5 (1510) -----TCCTTTTA
BoC4H-1 (1447) -----
BoC4H-2 (1510) -----TCCTTTTA
BoC4H-3 (1883) TATCCGTCTTTGATTTGGTTGGTGATGATCACACAACAACCAATCGGAAAGAATGTTCTC
BoC4H-4 (1510) -----GCCTTCTG
BoC4H-5 (1510) -----ACCTTTTG

    AtC4H (1519) -----
    BnC4HA (1768) -----
    BnC4HB (1740) -----
Br-cr-C4HL (1656) -----
    BrA-C4HL (1654) -----
    Br-sk-C4HL (1648) -----
    BcCyp450_C4H (1814) -----
BrC4H(DQ457008) (1734) -----
    BrC4H-1 (1516) TAA-----
    BrC4H-2 (1518) A-----
    BrC4H-3 (1518) A-----
    BrC4H-4 (1512) A-----
    BrC4H-5 (1518) A-----
    BoC4H-1 (1447) -----
    BoC4H-2 (1518) A-----
    BoC4H-3 (1943) CATCTGAGCCTCACATGGCATT'TTCAGTTGAAGGTTTAGGTAATAAACACGGAAACTC
    BoC4H-4 (1518) A-----
    BoC4H-5 (1518) A-----

    AtC4H (1519) -----
    BnC4HA (1768) -----
    BnC4HB (1740) -----
Br-cr-C4HL (1656) -----
    BrA-C4HL (1654) -----
    Br-sk-C4HL (1648) -----
    BcCyp450_C4H (1814) -----
BrC4H(DQ457008) (1734) -----
    BrC4H-1 (1519) -----
    BrC4H-2 (1519) -----
    BrC4H-3 (1519) -----
    BrC4H-4 (1513) -----
    BrC4H-5 (1519) -----
    BoC4H-1 (1447) -----
    BoC4H-2 (1519) -----
    BoC4H-3 (2003) CGCCTAATTCTCCACAACCATCAAGCAGAAACTTTGCGTACGGGTGCTCCTCTCCATGGA
    BoC4H-4 (1519) -----
    BoC4H-5 (1519) -----

    AtC4H (1519) -----
    BnC4HA (1768) -----
    BnC4HB (1740) -----
Br-cr-C4HL (1656) -----
    BrA-C4HL (1654) -----
    Br-sk-C4HL (1648) -----
    BcCyp450_C4H (1814) -----
BrC4H(DQ457008) (1734) -----
    BrC4H-1 (1519) -----
    BrC4H-2 (1519) -----
    BrC4H-3 (1519) -----
    BrC4H-4 (1513) -----
    BrC4H-5 (1519) -----
    BoC4H-1 (1447) -----
    BoC4H-2 (1519) -----

```

|                 |        |                                                              |
|-----------------|--------|--------------------------------------------------------------|
| BoC4H-3         | (2063) | ATGATTCCGGTCAACCTACATCAAACGTCAGGGAAAGGCTCAGCGACTTTGAGAAGGAAA |
| BoC4H-4         | (1519) | -----                                                        |
| BoC4H-5         | (1519) | -----                                                        |
| AtC4H           | (1519) | -----                                                        |
| BnC4HA          | (1768) | -----                                                        |
| BnC4HB          | (1740) | -----                                                        |
| Br-cr-C4HL      | (1656) | -----                                                        |
| BrA-C4HL        | (1654) | -----                                                        |
| Br-sk-C4HL      | (1648) | -----                                                        |
| BcCyp450_C4H    | (1814) | -----                                                        |
| BrC4H(DQ457008) | (1734) | -----                                                        |
| BrC4H-1         | (1519) | -----                                                        |
| BrC4H-2         | (1519) | -----                                                        |
| BrC4H-3         | (1519) | -----                                                        |
| BrC4H-4         | (1513) | -----                                                        |
| BrC4H-5         | (1519) | -----                                                        |
| BoC4H-1         | (1447) | -----                                                        |
| BoC4H-2         | (1519) | -----                                                        |
| BoC4H-3         | (2123) | GGGACATCATTGAAAGTAGCAAAATGTTCCAAGATGACAAACATTATAGGTCTCCCATCG |
| BoC4H-4         | (1519) | -----                                                        |
| BoC4H-5         | (1519) | -----                                                        |
| AtC4H           | (1519) | -----                                                        |
| BnC4HA          | (1768) | -----                                                        |
| BnC4HB          | (1740) | -----                                                        |
| Br-cr-C4HL      | (1656) | -----                                                        |
| BrA-C4HL        | (1654) | -----                                                        |
| Br-sk-C4HL      | (1648) | -----                                                        |
| BcCyp450_C4H    | (1814) | -----                                                        |
| BrC4H(DQ457008) | (1734) | -----                                                        |
| BrC4H-1         | (1519) | -----                                                        |
| BrC4H-2         | (1519) | -----                                                        |
| BrC4H-3         | (1519) | -----                                                        |
| BrC4H-4         | (1513) | -----                                                        |
| BrC4H-5         | (1519) | -----                                                        |
| BoC4H-1         | (1447) | -----                                                        |
| BoC4H-2         | (1519) | -----                                                        |
| BoC4H-3         | (2183) | ACATACATGCTACATATGGGGCAGAAAGTCAAAAAGTGGCGACTTCCACTGATCACTTGC |
| BoC4H-4         | (1519) | -----                                                        |
| BoC4H-5         | (1519) | -----                                                        |
| AtC4H           | (1519) | -----                                                        |
| BnC4HA          | (1768) | -----                                                        |
| BnC4HB          | (1740) | -----                                                        |
| Br-cr-C4HL      | (1656) | -----                                                        |
| BrA-C4HL        | (1654) | -----                                                        |
| Br-sk-C4HL      | (1648) | -----                                                        |
| BcCyp450_C4H    | (1814) | -----                                                        |
| BrC4H(DQ457008) | (1734) | -----                                                        |
| BrC4H-1         | (1519) | -----                                                        |
| BrC4H-2         | (1519) | -----                                                        |
| BrC4H-3         | (1519) | -----                                                        |
| BrC4H-4         | (1513) | -----                                                        |
| BrC4H-5         | (1519) | -----                                                        |
| BoC4H-1         | (1447) | -----                                                        |
| BoC4H-2         | (1519) | -----                                                        |
| BoC4H-3         | (2243) | ACAAACCATATATCAGCGACTCAAGAGGCTACTTATGTGACTGCAGATTTCACAAAA    |
| BoC4H-4         | (1519) | -----                                                        |
| BoC4H-5         | (1519) | -----                                                        |
| AtC4H           | (1519) | -----                                                        |
| BnC4HA          | (1768) | -----                                                        |

BnC4HB (1740) -----  
 Br-cr-C4HL (1656) -----  
 BrA-C4HL (1654) -----  
 Br-sk-C4HL (1648) -----  
 BcCyp450\_C4H (1814) -----  
 BrC4H(DQ457008) (1734) -----  
 BrC4H-1 (1519) -----  
 BrC4H-2 (1519) -----  
 BrC4H-3 (1519) -----  
 BrC4H-4 (1513) -----  
 BrC4H-5 (1519) -----  
 BoC4H-1 (1447) -----  
 BoC4H-2 (1519) -----  
 BoC4H-3 (2303) GCAGGGTATTTGATGAAAACGAGTGGAATGCTAAACCCACCTTTCTAGATGACGGGGTGG  
 BoC4H-4 (1519) -----  
 BoC4H-5 (1519) -----

AtC4H (1519) -----  
 BnC4HA (1768) -----  
 BnC4HB (1740) -----  
 Br-cr-C4HL (1656) -----  
 BrA-C4HL (1654) -----  
 Br-sk-C4HL (1648) -----  
 BcCyp450\_C4H (1814) -----  
 BrC4H(DQ457008) (1734) -----  
 BrC4H-1 (1519) -----  
 BrC4H-2 (1519) -----  
 BrC4H-3 (1519) -----  
 BrC4H-4 (1513) -----  
 BrC4H-5 (1519) -----  
 BoC4H-1 (1447) -----  
 BoC4H-2 (1519) -----  
 BoC4H-3 (2363) GCAGATTTTACTGGGAAGGACCAACAGCCACGTCAAGAAAACCTTAATTTCAACAATTTGA  
 BoC4H-4 (1519) -----  
 BoC4H-5 (1519) -----

AtC4H (1519) -----  
 BnC4HA (1768) -----  
 BnC4HB (1740) -----  
 Br-cr-C4HL (1656) -----  
 BrA-C4HL (1654) -----  
 Br-sk-C4HL (1648) -----  
 BcCyp450\_C4H (1814) -----  
 BrC4H(DQ457008) (1734) -----  
 BrC4H-1 (1519) -----  
 BrC4H-2 (1519) -----  
 BrC4H-3 (1519) -----  
 BrC4H-4 (1513) -----  
 BrC4H-5 (1519) -----  
 BoC4H-1 (1447) -----  
 BoC4H-2 (1519) -----  
 BoC4H-3 (2423) AAACCTACCACTTCTTCTGCAGAACACCATGCTACAAGAAGAGGGATTACCTGGAAACGA  
 BoC4H-4 (1519) -----  
 BoC4H-5 (1519) -----

AtC4H (1519) -----  
 BnC4HA (1768) -----  
 BnC4HB (1740) -----  
 Br-cr-C4HL (1656) -----  
 BrA-C4HL (1654) -----  
 Br-sk-C4HL (1648) -----  
 BcCyp450\_C4H (1814) -----  
 BrC4H(DQ457008) (1734) -----

|                 |        |                                                               |
|-----------------|--------|---------------------------------------------------------------|
| BrC4H-1         | (1519) | -----                                                         |
| BrC4H-2         | (1519) | -----                                                         |
| BrC4H-3         | (1519) | -----                                                         |
| BrC4H-4         | (1513) | -----                                                         |
| BrC4H-5         | (1519) | -----                                                         |
| BoC4H-1         | (1447) | -----                                                         |
| BoC4H-2         | (1519) | -----                                                         |
| BoC4H-3         | (2483) | CCTGGAGGTCCAACATCGAAGGTTACCAGTTCGAAGACCACAGCGTCTAGAAAGGGCCA   |
| BoC4H-4         | (1519) | -----                                                         |
| BoC4H-5         | (1519) | -----                                                         |
| AtC4H           | (1519) | -----                                                         |
| BnC4HA          | (1768) | -----                                                         |
| BnC4HB          | (1740) | -----                                                         |
| Br-cr-C4HL      | (1656) | -----                                                         |
| BrA-C4HL        | (1654) | -----                                                         |
| Br-sk-C4HL      | (1648) | -----                                                         |
| BcCyp450_C4H    | (1814) | -----                                                         |
| BrC4H(DQ457008) | (1734) | -----                                                         |
| BrC4H-1         | (1519) | -----                                                         |
| BrC4H-2         | (1519) | -----                                                         |
| BrC4H-3         | (1519) | -----                                                         |
| BrC4H-4         | (1513) | -----                                                         |
| BrC4H-5         | (1519) | -----                                                         |
| BoC4H-1         | (1447) | -----                                                         |
| BoC4H-2         | (1519) | -----                                                         |
| BoC4H-3         | (2543) | TCGATCATCCGAGTTTTGAAAGGGAAACAACCCTCGACTTTAACTTTGACAAAGTATTTG  |
| BoC4H-4         | (1519) | -----                                                         |
| BoC4H-5         | (1519) | -----                                                         |
| AtC4H           | (1519) | -----                                                         |
| BnC4HA          | (1768) | -----                                                         |
| BnC4HB          | (1740) | -----                                                         |
| Br-cr-C4HL      | (1656) | -----                                                         |
| BrA-C4HL        | (1654) | -----                                                         |
| Br-sk-C4HL      | (1648) | -----                                                         |
| BcCyp450_C4H    | (1814) | -----                                                         |
| BrC4H(DQ457008) | (1734) | -----                                                         |
| BrC4H-1         | (1519) | -----                                                         |
| BrC4H-2         | (1519) | -----                                                         |
| BrC4H-3         | (1519) | -----                                                         |
| BrC4H-4         | (1513) | -----                                                         |
| BrC4H-5         | (1519) | -----                                                         |
| BoC4H-1         | (1447) | -----                                                         |
| BoC4H-2         | (1519) | -----                                                         |
| BoC4H-3         | (2603) | ACCCACCGGTTTTGGTCATCCGTTGTACTTGAGGAAGACAAAGACAGCCATAGCTTGCGTA |
| BoC4H-4         | (1519) | -----                                                         |
| BoC4H-5         | (1519) | -----                                                         |
| AtC4H           | (1519) | -----                                                         |
| BnC4HA          | (1768) | -----                                                         |
| BnC4HB          | (1740) | -----                                                         |
| Br-cr-C4HL      | (1656) | -----                                                         |
| BrA-C4HL        | (1654) | -----                                                         |
| Br-sk-C4HL      | (1648) | -----                                                         |
| BcCyp450_C4H    | (1814) | -----                                                         |
| BrC4H(DQ457008) | (1734) | -----                                                         |
| BrC4H-1         | (1519) | -----                                                         |
| BrC4H-2         | (1519) | -----                                                         |
| BrC4H-3         | (1519) | -----                                                         |
| BrC4H-4         | (1513) | -----                                                         |
| BrC4H-5         | (1519) | -----                                                         |
| BoC4H-1         | (1447) | -----                                                         |



BoC4H-2 (1519) -----  
 BoC4H-3 (2663) GTGAAGAATCTTGCTCGTCTAGTGCAGTTTGGGCCAATGAAACCTCCATTTACATGAGA  
 BoC4H-4 (1519) -----  
 BoC4H-5 (1519) -----  
  
 AtC4H (1519) -----  
 BnC4HA (1768) -----  
 BnC4HB (1740) -----  
 Br-cr-C4HL (1656) -----  
 BrA-C4HL (1654) -----  
 Br-sk-C4HL (1648) -----  
 BcCyp450\_C4H (1814) -----  
 BrC4H(DQ457008) (1734) -----  
 BrC4H-1 (1519) -----  
 BrC4H-2 (1519) -----  
 BrC4H-3 (1519) -----  
 BrC4H-4 (1513) -----  
 BrC4H-5 (1519) -----  
 BoC4H-1 (1447) -----  
 BoC4H-2 (1519) -----  
 BoC4H-3 (2723) CCAATACAAGACAGAGAAAGGGGAAACTGATTCTTTTACACCTTGGAACAAGAAGT  
 BoC4H-4 (1519) -----  
 BoC4H-5 (1519) -----  
  
 AtC4H (1519) -----  
 BnC4HA (1768) -----  
 BnC4HB (1740) -----  
 Br-cr-C4HL (1656) -----  
 BrA-C4HL (1654) -----  
 Br-sk-C4HL (1648) -----  
 BcCyp450\_C4H (1814) -----  
 BrC4H(DQ457008) (1734) -----  
 BrC4H-1 (1519) -----  
 BrC4H-2 (1519) -----  
 BrC4H-3 (1519) -----  
 BrC4H-4 (1513) -----  
 BrC4H-5 (1519) -----  
 BoC4H-1 (1447) -----  
 BoC4H-2 (1519) -----  
 BoC4H-3 (2783) ATTTGAATAATGGCCTTTCCTATGAATCTTGGGAAGACTGGGATGTGGATGATCAACAAC  
 BoC4H-4 (1519) -----  
 BoC4H-5 (1519) -----  
  
 AtC4H (1519) -----  
 BnC4HA (1768) -----  
 BnC4HB (1740) -----  
 Br-cr-C4HL (1656) -----  
 BrA-C4HL (1654) -----  
 Br-sk-C4HL (1648) -----  
 BcCyp450\_C4H (1814) -----  
 BrC4H(DQ457008) (1734) -----  
 BrC4H-1 (1519) -----  
 BrC4H-2 (1519) -----  
 BrC4H-3 (1519) -----  
 BrC4H-4 (1513) -----  
 BrC4H-5 (1519) -----  
 BoC4H-1 (1447) -----  
 BoC4H-2 (1519) -----  
 BoC4H-3 (2843) TGAAGAGAAAAGTTGGGTCTGGAAAGCAGGTCAGACTATCAAACCCAGGAATGTTGAGAT  
 BoC4H-4 (1519) -----  
 BoC4H-5 (1519) -----  
  
 AtC4H (1519) -----

BnC4HA (1768) -----  
BnC4HB (1740) -----  
Br-cr-C4HL (1656) -----  
BrA-C4HL (1654) -----  
Br-sk-C4HL (1648) -----  
BcCyp450\_C4H (1814) -----  
BrC4H(DQ457008) (1734) -----  
BrC4H-1 (1519) -----  
BrC4H-2 (1519) -----  
BrC4H-3 (1519) -----  
BrC4H-4 (1513) -----  
BrC4H-5 (1519) -----  
BoC4H-1 (1447) -----  
BoC4H-2 (1519) -----  
BoC4H-3 (2903) CTACCAGTCAGAGAGACTCCTCTTCCCGTGGTGGTCTCGACGCCCTTACAATTGGTTTG  
BoC4H-4 (1519) -----  
BoC4H-5 (1519) -----

AtC4H (1519) -----  
BnC4HA (1768) -----  
BnC4HB (1740) -----  
Br-cr-C4HL (1656) -----  
BrA-C4HL (1654) -----  
Br-sk-C4HL (1648) -----  
BcCyp450\_C4H (1814) -----  
BrC4H(DQ457008) (1734) -----  
BrC4H-1 (1519) -----  
BrC4H-2 (1519) -----  
BrC4H-3 (1519) -----  
BrC4H-4 (1513) -----  
BrC4H-5 (1519) -----  
BoC4H-1 (1447) -----  
BoC4H-2 (1519) -----  
BoC4H-3 (2963) CAGAAGGATTTACAGCTGCAGGCATAAGCTCAGATATTACAACCGAGAGACAAACCAT  
BoC4H-4 (1519) -----  
BoC4H-5 (1519) -----

AtC4H (1519) -----  
BnC4HA (1768) -----  
BnC4HB (1740) -----  
Br-cr-C4HL (1656) -----  
BrA-C4HL (1654) -----  
Br-sk-C4HL (1648) -----  
BcCyp450\_C4H (1814) -----  
BrC4H(DQ457008) (1734) -----  
BrC4H-1 (1519) -----  
BrC4H-2 (1519) -----  
BrC4H-3 (1519) -----  
BrC4H-4 (1513) -----  
BrC4H-5 (1519) -----  
BoC4H-1 (1447) -----  
BoC4H-2 (1519) -----  
BoC4H-3 (3023) ATCCTTTCCTAAACCCCGTTGTTGGTAGCTCGCACCGCGTCAATCTCGAGCCCCTGATT  
BoC4H-4 (1519) -----  
BoC4H-5 (1519) -----

AtC4H (1519) -----  
BnC4HA (1768) -----  
BnC4HB (1740) -----  
Br-cr-C4HL (1656) -----  
BrA-C4HL (1654) -----  
Br-sk-C4HL (1648) -----  
BcCyp450\_C4H (1814) -----

|                 |        |                                                               |
|-----------------|--------|---------------------------------------------------------------|
| BrC4H(DQ457008) | (1734) | -----                                                         |
| BrC4H-1         | (1519) | -----                                                         |
| BrC4H-2         | (1519) | -----                                                         |
| BrC4H-3         | (1519) | -----                                                         |
| BrC4H-4         | (1513) | -----                                                         |
| BrC4H-5         | (1519) | -----                                                         |
| BoC4H-1         | (1447) | -----                                                         |
| BoC4H-2         | (1519) | -----                                                         |
| BoC4H-3         | (3083) | CTATTCGGAAACATGGGTCCCTAAGTATTTCAGCAGAAGGCAGTGGATATGGTGATGATG  |
| BoC4H-4         | (1519) | -----                                                         |
| BoC4H-5         | (1519) | -----                                                         |
| AtC4H           | (1519) | -----                                                         |
| BnC4HA          | (1768) | -----                                                         |
| BnC4HB          | (1740) | -----                                                         |
| Br-cr-C4HL      | (1656) | -----                                                         |
| BrA-C4HL        | (1654) | -----                                                         |
| Br-sk-C4HL      | (1648) | -----                                                         |
| BcCyp450_C4H    | (1814) | -----                                                         |
| BrC4H(DQ457008) | (1734) | -----                                                         |
| BrC4H-1         | (1519) | -----                                                         |
| BrC4H-2         | (1519) | -----                                                         |
| BrC4H-3         | (1519) | -----                                                         |
| BrC4H-4         | (1513) | -----                                                         |
| BrC4H-5         | (1519) | -----                                                         |
| BoC4H-1         | (1447) | -----                                                         |
| BoC4H-2         | (1519) | -----                                                         |
| BoC4H-3         | (3143) | AACACAACCTACATGAACTGTGTATCAGCAAACCATAAATCTAAACTAGCAGGAGACGTAT |
| BoC4H-4         | (1519) | -----                                                         |
| BoC4H-5         | (1519) | -----                                                         |
| AtC4H           | (1519) | -----                                                         |
| BnC4HA          | (1768) | -----                                                         |
| BnC4HB          | (1740) | -----                                                         |
| Br-cr-C4HL      | (1656) | -----                                                         |
| BrA-C4HL        | (1654) | -----                                                         |
| Br-sk-C4HL      | (1648) | -----                                                         |
| BcCyp450_C4H    | (1814) | -----                                                         |
| BrC4H(DQ457008) | (1734) | -----                                                         |
| BrC4H-1         | (1519) | -----                                                         |
| BrC4H-2         | (1519) | -----                                                         |
| BrC4H-3         | (1519) | -----                                                         |
| BrC4H-4         | (1513) | -----                                                         |
| BrC4H-5         | (1519) | -----                                                         |
| BoC4H-1         | (1447) | -----                                                         |
| BoC4H-2         | (1519) | -----                                                         |
| BoC4H-3         | (3203) | GCAGTTTTGGGAGTGATACGTTATCAGAGAACGATAATGAACAAAGCAAAGAAGTGAATG  |
| BoC4H-4         | (1519) | -----                                                         |
| BoC4H-5         | (1519) | -----                                                         |
| AtC4H           | (1519) | -----                                                         |
| BnC4HA          | (1768) | -----                                                         |
| BnC4HB          | (1740) | -----                                                         |
| Br-cr-C4HL      | (1656) | -----                                                         |
| BrA-C4HL        | (1654) | -----                                                         |
| Br-sk-C4HL      | (1648) | -----                                                         |
| BcCyp450_C4H    | (1814) | -----                                                         |
| BrC4H(DQ457008) | (1734) | -----                                                         |
| BrC4H-1         | (1519) | -----                                                         |
| BrC4H-2         | (1519) | -----                                                         |
| BrC4H-3         | (1519) | -----                                                         |
| BrC4H-4         | (1513) | -----                                                         |
| BrC4H-5         | (1519) | -----                                                         |

```

BoC4H-1 (1447) -----
BoC4H-2 (1519) -----
BoC4H-3 (3263) ATCCAAAAAATCAGGGAGATGAGACCTCATCATCCGTTGCAAAGAGCCTCTCAGACGAAA
BoC4H-4 (1519) -----
BoC4H-5 (1519) -----

    AtC4H (1519) -----
    BnC4HA (1768) -----
    BnC4HB (1740) -----
Br-cr-C4HL (1656) -----
  BrA-C4HL (1654) -----
  Br-sk-C4HL (1648) -----
BcCyp450_C4H (1814) -----
BrC4H(DQ457008) (1734) -----
  BrC4H-1 (1519) -----
  BrC4H-2 (1519) -----
  BrC4H-3 (1519) -----
  BrC4H-4 (1513) -----
  BrC4H-5 (1519) -----
  BoC4H-1 (1447) -----
  BoC4H-2 (1519) -----
  BoC4H-3 (3323) ATGAGTATGTACGATGTAACCCGAACAAGGAGGTTGTGAAAGCTCGGCATCAAGGAAACA
  BoC4H-4 (1519) -----
  BoC4H-5 (1519) -----

    AtC4H (1519) -----
    BnC4HA (1768) -----
    BnC4HB (1740) -----
Br-cr-C4HL (1656) -----
  BrA-C4HL (1654) -----
  Br-sk-C4HL (1648) -----
BcCyp450_C4H (1814) -----
BrC4H(DQ457008) (1734) -----
  BrC4H-1 (1519) -----
  BrC4H-2 (1519) -----
  BrC4H-3 (1519) -----
  BrC4H-4 (1513) -----
  BrC4H-5 (1519) -----
  BoC4H-1 (1447) -----
  BoC4H-2 (1519) -----
  BoC4H-3 (3383) GAGGAGGAGAAAAGACAAGTAGAGACTCGCACCAACAAATGATAATGCTGGAAAGACGCA
  BoC4H-4 (1519) -----
  BoC4H-5 (1519) -----

    AtC4H (1519) -----
    BnC4HA (1768) -----
    BnC4HB (1740) -----
Br-cr-C4HL (1656) -----
  BrA-C4HL (1654) -----
  Br-sk-C4HL (1648) -----
BcCyp450_C4H (1814) -----
BrC4H(DQ457008) (1734) -----
  BrC4H-1 (1519) -----
  BrC4H-2 (1519) -----
  BrC4H-3 (1519) -----
  BrC4H-4 (1513) -----
  BrC4H-5 (1519) -----
  BoC4H-1 (1447) -----
  BoC4H-2 (1519) -----
  BoC4H-3 (3443) CGCTTCAATTCGTTTGTTTAAACAAGACATTGCTCCTTGAAGCTCTTTAAAAACTTAG
  BoC4H-4 (1519) -----
  BoC4H-5 (1519) -----

```

### 3. BnTT4

AtTT4 (1) -----  
 BnTT4A1 (1) -----  
 BnTT4A2 (1) -----GAA  
 BnTT4B1 (1) GATACATACATAACTTGCTTATTACGCCAAAGTAACACATCGATCAAACCTTTAGTTAAAC  
 BnTT4B2 (1) ---ACATACATAACTTGCTTACTACGCCAAAGTTACACATCGATCTAACTCTAGTTAAAC  
 BrTT4-1 (1) -----  
 BrTT4-2 (1) -----  
 BrTT4-3 (1) -----  
 BrTT4-4 (1) -----  
 BrTT4-5 (1) -----  
 BrTT4-6 (1) -----  
 BoTT4-1 (1) -----  
 BoTT4-2 (1) -----  
 BoTT4-3 (1) -----  
 BoTT4-4 (1) -----  
 BjTT4 (1) -----

AtTT4 (1) -----ATGGTGATGGCTGGTG---CTTCTTCTTTGGATGAGATCAGACAGG  
 BnTT4A1 (1) -----  
 BnTT4A2 (4) ACCAAGTTGGTAATACTATGGTGATGTGTACACCGTCTTCGTTGGATGAGATCAGAAAGG  
 BnTT4B1 (61) CTAGTTGGTTTAATATGGTGATGGGGCT-----TCTTCGTTGGATGAGATCAGAAAGG  
 BnTT4B2 (58) CTAGTTGGTTTAATATGGTGATGGTGGGTACAACCTCTTCGTTGGATGAGATCAGAAAGG  
 BrTT4-1 (1) -----ATGGTGATGTGTACACCGTCTTCGTTGGATGAGATCAGAAAGG  
 BrTT4-2 (1) -----ATGGTGATGAGTAGGCCGTCATCATCGTTGGATGAGATCAGAAAGG  
 BrTT4-3 (1) -----ATGGTGATGGGTACACCGTCTTCGTTGGATGAGATCAGAAAGG  
 BrTT4-4 (1) -----ATGGTGATGGGTG---CCTTGCTCTTGGATGAGATCAGAAAGG  
 BrTT4-5 (1) -----ATGGTGATGGGGCT-----TCTTCGTTGGATGAGATCAGAAAGG  
 BrTT4-6 (1) -----ATGTCACGCCGCTTCGTTGGACGAGATCAGAAAGG  
 BoTT4-1 (1) -----ATGGTGATGTGTACACCGTCTTCGTTGGATGAGATCAGAAAGG  
 BoTT4-2 (1) -----ATGGTGATGGTGGGTACAACCTCTTCGTTGGATGAGATCAGAAAGG  
 BoTT4-3 (1) -----ATGGTCATGAGTAGGCCGTCATCATCGTTGGATGAGATCAGAAAGG  
 BoTT4-4 (1) -----ATGGTGATGTGTACACCGTCTTCGTTGGATGAGATCAGAAAGG  
 BjTT4 (1) -----ATGGTGATGTGTACACCGTCTTCGTTGGATGAGATCAGAAAGG

AtTT4 (44) CTCAGAGAGCTGATGGACCTGCAGGCATCTTGGCTATTGGCACTGCTAACCCTGAGAACC  
 BnTT4A1 (1) -----GCAGGTATCTTGGCGATAGGCACGGCTAACCCTGCCAACC  
 BnTT4A2 (64) CGCAGAGAGCAGATGGCCCAGCAGGTATATTGGCGATCGGCACGGCTAACCCTGCCAACC  
 BnTT4B1 (115) CACAGAGAGCAGACGGTCTCTGCAGGCATCTTAGCGATAGGTACGGCCAACCCTGCGAACC  
 BnTT4B2 (118) CACAGAGAGCAGACGGCCCTGCAGGCATCTTGGCGATAGGTACGGCCAACCCTGCGAACC  
 BrTT4-1 (44) CGCAAAGAGCAGATGGCCCAGCAGGTATCTTGGCGATAGGCACGGCTAACCCTGCCAACC  
 BrTT4-2 (47) CACAAAGAGCTGATGGTCCCAGGTATCTTGGCTATAGGCACGGCCAACCCTGCGAACC  
 BrTT4-3 (44) CGCAAAGAGCAGATGGCCCAGCAGGTATCTTGGCGATAGGCACGGCTAACCCTGCCAACC  
 BrTT4-4 (41) CACAAAGAGGTGATGGACCAGCAAGCATCTTGGCCATAGGCACTGCCAACCCCTCCAAACC  
 BrTT4-5 (41) CACAGAGAGCAGACGGTCTCTGCAGGCATCTTAGCGATAGGTACGGCCAACCCTGCGAACC  
 BrTT4-6 (38) CACAGAGAGCAGATGGCCCTGCAGGTATCTTGGCGATAGGCACGGCCAACCCTGCGAACC  
 BoTT4-1 (44) CACAGAGAGCAGATGGCCCAGCAGGTATCTTGGCGATAGGCACGGCTAACCCTGCCAACC  
 BoTT4-2 (47) CACAGAGAGCAGACGGCCCTGCAGGCATCTTGGCGATAGGTACGGCCAACCCTGCGAACC  
 BoTT4-3 (47) CACAAAGAGCTGATGGTCCCAGGTATCTTGGCTATAGGCACGGCCAACCCTGCGAACC  
 BoTT4-4 (44) CGCAGAGAGCAGATGGCCCAGCAGGTATATTGGCGATCGGCACGGCTAACCCTGCCAACC  
 BjTT4 (44) CGCAAAGAGCAGATGGCCCAGCAGGTATCTTGGCGATAGGCACGGCTAACCCTGCCAACC

AtTT4 (104) ATGTGCTTCCAGGCGGAGTATCCTGACTACTACTTCCGCATCACCAACAGTGAACACATGA  
 BnTT4A1 (41) ATGTGATCCAAGCGGAGTATCCTGACTACTACTTCCGCATCACCAACAGCGAACACATGA  
 BnTT4A2 (124) ATGTGATCCAAGCTGAGTATCCTGACTACTACTTCCGCATCACCAACAGCGAACACATGA  
 BnTT4B1 (175) ATGTGCTCCAAGCTGAGTATCCAGACTACTACTTCCGCATCACCAACAGTGAACACATGA  
 BnTT4B2 (178) ATGTGCTCCAAGCGGAGTATCCAGACTACTACTTCCGCATCACCAACAGTGAACACATGA  
 BrTT4-1 (104) ATGTGATCCAAGCGGAGTATCCTGACTACTACTTCCGCATCACCAACAGCGAACACATGA  
 BrTT4-2 (107) ATGTGATCCAAGCGGAGTATCCAGACTACTACTTCCGCATCACCAACAGTGAACACATGA  
 BrTT4-3 (104) ATGTGATCCAAGCGGAGTATCCTGACTACTACTTCCGCATCACCAACAGCGAACACATGA  
 BrTT4-4 (101) AAGTGATCCAAGCAGAGTATCCAGACTACTACTTCCGCATCACCAACAGTGAACACATGA  
 BrTT4-5 (101) ATGTGCTCCAAGCTGAGTATCCAGACTACTACTTCCGCATCACCAACAGTGAACACATGA

BrTT4-6 (98) ATGTGATCCAAGCGGAGTATCCC GACTACTACTTCCGCATCACCAACAGCGAACACATGA  
 BoTT4-1 (104) ATGTGATCCAAGCGGAGTATCCTGACTACTACTTCCGCATCACCAACAGCGAACACATGA  
 BoTT4-2 (107) ATGTGCTCCAAGCGGAGTATCCAGACTACTACTTCCGCATCACCAACAGTGAACACATGA  
 BoTT4-3 (107) ATGTGATCCAAGCGGAGTATCCTGACTACTACTTCCGCATCACCAACAGTGAACACATGA  
 BoTT4-4 (104) ATGTGATCCAAGCTGAGTATCCTGACTACTACTTCCGCATCACCAACAGCGAACACATGA  
 BjTT4 (104) ATGTGATCCAAGCGGAGTATCCTGACTACTACTTCCGCATCACCAACAGCGAACACATGA

AtTT4 (164) CCGACCTCAAGGAGAAGTTCAAGCGCATGTGCGACAAGTCGACAATTCGGAAACGTCACA  
 BnTT4A1 (101) CTGACCTTAAAGGAGAAGTTCAAGCGCATGTGCGACAAGTCGACTATAAGAAAACGCCACA  
 BnTT4A2 (184) CTGACCTTAAAGGAGAAGTTCAAGCGCATGTGCGACAAGTCGACTATAAGGAAACGCCACA  
 BnTT4B1 (235) CCGACCTTAAAGGAGAAGTTCAAGCGCATGTGCGATAAGTCGACCATAAGGAAACGCCACA  
 BnTT4B2 (238) CCGACCTTAAAGGAGAAGTTCAAGCGCATGTGCGATAAGTCGACCATAAGGAAACGCCACA  
 BrTT4-1 (164) CTGACCTTAAAGGAGAAGTTCAAGCGCATGTGCGACAAGTCGACTATAAGGAAACGCCACA  
 BrTT4-2 (167) CTGACCTCAAGGAGAAGTTCAAGCGCATGTGTGACAAGTCGATGATAAGGAAACGACACA  
 BrTT4-3 (164) CTGACCTTAAAGGAGAAGTTCAAGCGCATGTGCGACAAGTCGACGATAAGGAAACGCCACA  
 BrTT4-4 (161) CCGACCTCAAGGAGAAGTTCAAGCGCATGTGCGACAAATCAATGATAAGGAAACGTTACA  
 BrTT4-5 (161) CCGCCTTAAAGGAGAAGTTCAAGCGCATGTGCGATAAGTCGACCATAAGGAAACGCCACA  
 BrTT4-6 (158) TCGACCTTAAAGGAGAAGTTCAAGCGCATGTGCGACAAATCGGGGATAAGGAAACGCCACA  
 BoTT4-1 (164) CTGACCTTAAAGGAGAAGTTCAAGCGCATGTGCGACAAGTCGACTATAAGGAAACGCCACA  
 BoTT4-2 (167) CCGACCTTAAAGGAGAAGTTCAAGCGCATGTGCGATAAGTCGACCATAAGGAAACGCCACA  
 BoTT4-3 (167) CTGACCTCAAGGAGAAGTTCAAGCGCATGTGTGACAAGTCGATGATAAGGAAACGACACA  
 BoTT4-4 (164) CTGACCTTAAAGGAGAAGTTCAAGCGCATGTGCGACAAGTCGACTATAAGGAAACGCCACA  
 BjTT4 (164) CTGACCTTAAAGGAGAAGTTCAAGCGCATGTGCGACAAGTCGACTATAAGGAAACGCCACA

AtTT4 (224) TGCATCTGACGGAGGAATTCTCAAGGAAAACCCACACATGTGTGCTTACATGGCTCCTT  
 BnTT4A1 (161) TGCACCTAACC GAAGAGTTTCT **AAAGGAGAACCAGACATGTG**CGCCTACATGGCTCCTT  
 BnTT4A2 (244) TGCACCTAACC GAAGAGTTTCT **AAAGGAGAACCAGACATGTG**CGCCTACATGTCTCCTT  
 BnTT4B1 (295) TGCACCTGACCGAGGAGTTCTTGAAGAGAAACCCTAACATGTGCGCTACATGGCCCTT  
 BnTT4B2 (298) TGCACCTGACCGAGGAGTTCTTGAAGAGAAACCCTAAATATGTGTGCTACATGGCTCCTT  
 BrTT4-1 (224) TGCACCTAACC GAAGAGTTTCTAAAGGAGAACCAGACATGTGCGCTACATGGCTCCTT  
 BrTT4-2 (227) TGCACCTAACC GAAGAGTTCTTGAAGGAGAATCCCAACATGTGCGCTACATGGCTCCTT  
 BrTT4-3 (224) TGCACCTAACC GAAGAGTTCTAAAGGAGAACCAGACATGTGCGCTACATGGCTCCTT  
 BrTT4-4 (221) TGCACCTGACTGAAGAGTTTCTCAAGGACAACCCCAACGTATGCGCTTACATGGCTCCTT  
 BrTT4-5 (221) TGCACCTGACCGAGGAGTTCTTGAAGAGAAACCCTAACATGTGTGCTACATGGCTCCTT  
 BrTT4-6 (218) TGCACCTGACGGAAGAGTTTCTGAAGGACAATCCAAACATGTGCGCTACATGGCTCCTT  
 BoTT4-1 (224) TGCACCTAACC GAAGAGTTTCTAAAGGAGAACCAGACATGTGCGCTACATGGCTCCTT  
 BoTT4-2 (227) TGCACCTAACC GAAGAGTTCTTGAAGGAGAATCCGAACATGTGCGCTACATGGCTCCTT  
 BoTT4-3 (227) TGCACCTAACC GAAGAGTTCTTGAAGGAGAATCCGAACATGTGCGCTACATGGCTCCTT  
 BoTT4-4 (224) TGCACCTAACC GAAGAGTTTCTAAAGGAGAACCAGACATGTGCGCTACATGTCTCCTT  
 BjTT4 (224) TGCACCTAACC GAAGAGTTTCTAAAGGAGAACCAGACATGTGCGCTACATGGCTCCTT

AtTT4 (284) CTCTGGACACCAGACAGGACATCGTGGTGGTTCGAAGTCCCTAAGCTAGGCAAAGAGGCGG  
 BnTT4A1 (221) CTCTCGACGCTCGACAGGACATCGTGGTGGTTCGAGGTCCCTAAGCTAGGCAAAGAGGCGG  
 BnTT4A2 (304) CTCTCGACGCTCGACAGGACATCGTGGTGGTTCGAAGTCCCTAAGCTAGGCAAAGAGGCGG  
 BnTT4B1 (355) CTCTCGACGCTAGACAAGACCTCGTGGTGGTTGAAGTCCCTAAGCTAGGCAAAGATGCAG  
 BnTT4B2 (358) CGCTCGATGCTAGACAAGACCTCGTGGTGGTTGAAGTCCCTAAGCTAGGCAAAGATGCAG  
 BrTT4-1 (284) CTCTCGACGCTCGACAGGATATCGTGGTGGTTCGAAGTCCCTAAGCTAGGCAAAGAGGCGG  
 BrTT4-2 (287) CTCTCGACGCTAGACAAGACATCGTGGTGGTTGAAGTCCCTAAGCTAGGCAAAGAGGCGG  
 BrTT4-3 (284) CTCTCGACGCTCGACAGGACATCGTGGTGGTTCGAAGTCCCTAAGCTAGGCAAAGAGGCTG  
 BrTT4-4 (281) CCTTGGACGTTAGGACAGGACATCTGGTGGCCGAGTCCCTAAGCTAGGCAAAGAGGCTG  
 BrTT4-5 (281) CGCTCGATGCTAGACAAGACCTCGTGGTGGTTGAAGTCCCTAAGCTAGGCAAAGATGCAG  
 BrTT4-6 (278) CTCTCGACGTTTCGACAGGACCTAGTGGTGGTTGAAGTCCCTAAGCTAGGCAAAGAGGCGG  
 BoTT4-1 (284) CTCTCGACGCTCGACAGGACATCGTGGTGGTTCGAAGTCCCTAAGCTAGGCAAAGAGGCGG  
 BoTT4-2 (287) CTCTCGACGCTAGACAAGACCTCGTGGTGGTTGAAGTCCCTAAGCTAGGCAAAGATGCAG  
 BoTT4-3 (287) CTCTCGACGCTAGACAAGACATCGTGGTGGTTGAAGTCCCTAAGCTAGGCAAAGAGGCTG  
 BoTT4-4 (284) CTCTCGACGCTCGACAGGACATCGTGGTGGTTCGAAGTCCCTAAGCTAGGCAAAGAGGCGG  
 BjTT4 (284) CTCTCGACGCTCGACAGGACATCGTGGTGGTTCGAGGTCCCTAAGCTAGGCAAAGAGGCGG

AtTT4 (344) CAGTGAAGGCCATCAAGGAGTGGGGCCAGCCCAAGTCAAAGATCACTCATGTCTTCTTCT  
 BnTT4A1 (281) CAGTGAAGGCCATCAAGGAATGG **GGCCAGCCCAAGTCCAAG**GTTACACACGTTGTCTTCT  
 BnTT4A2 (364) CAGTGAAGGCCATCAAGGAATGG **GGCCAGCCCAAGTCCAAG**AATACCCACGTTGTCTTCT  
 BnTT4B1 (415) CAGTGAAGGCCATCAAGGAGTGGGGTTCAGCCTAAGTCAAAGATCACACACGTTGTCTTCT  
 BnTT4B2 (418) CAGTGAAGGCCATCAAGGAGTGGGGTTCAGCCTAAGTCAAAGATCACACACGTTGTCTTCT

BrTT4-1 (344) CAGTGAAGGCCATCAAGGAATGGGGCCAGCCCAGTCCAAGATTACACACGTTGTCTTCT  
BrTT4-2 (347) CAGTGAAGGCCATTAAAGGAGTGGGGTCAGCCTAAGTCCAAGATCACACACGTTGCTTCT  
BrTT4-3 (344) CCGTGAAGGCCATCAAGGAGTGGGGCCAGCCCAGTCCAAGATTACACACGTTGTCTTCT  
BrTT4-4 (341) CAGTGAAGGCCATCACGGAGTGGGGCCAGCCCAGTCCAAGATCACTCATCTAGTCTTCT  
BrTT4-5 (341) CAGTGAAGGCCATCAAGGAGTGGGGTCAGCCTAAGTCCAAGATCAAACACGTTGTCTTCT  
BrTT4-6 (338) CAGTGAAGGCCATCAACGAATGGGGTCAGCCCAGTCCAGGATTACCCACCTTGTCTTCT  
BoTT4-1 (344) CAGTGAAGGCCATCAAGGAATGGGGCCAGCCCAGTCCAAGATTACCCACGTTGTCTTCT  
BoTT4-2 (347) CAGTGAAGGCCATCAAGGAATGGGGTCAGCCTAAGTCCAAGATCACACACGTTGTCTTCT  
BoTT4-3 (347) CAGTGAAGGCCATCAAGGAGTGGGGCCAGCCCAGTCCAAGATCACACACGTTGTCTTCT  
BoTT4-4 (344) CAGTGAAGGCCATCAAAGAATGGGGCCAGCCCAGTCCAAGATTACCCACGTTGTCTTCT  
BjTT4 (344) CAGTGAAGGCCATCAAGGAATGGGGCCAGCCCAGTCCAAGATTACACACGTTGTCTTCT

AtTT4 (404) GCACTACCTCCGGCGTCGACATGCCTGGTGCTGACTACCAGTCAACCAAGCTTCTTGGTC  
BnTT4A1 (341) GCACTACCTCAGGAGTCGACATGCCTGGTGCTGACTACCAGTCAACCAAGCTCCTCGGTC  
BnTT4A2 (424) GCACTACCTCAGGAGTCGACATGCCTGGTGCTGACTACCAGTCAACCAAGCTCCTCGGTC  
BnTT4B1 (475) GCACCACCTCTGGAGTTGACATGCCTGGTGCTGACTACCAGTCAACCAAGCTCCTTGGCC  
BnTT4B2 (478) GCACCACCTCAGGAGTTGACATGCCTGGTGCTGACTACCAGTCAACCAAGCTCCTTGGCC  
BrTT4-1 (404) GCACTACCTCAGGAGTCGACATGCCTGGTGCTGACTACCAGTCAACCAAGCTCCTCGGTC  
BrTT4-2 (407) GCACCACCTCAGGAGTCGACATGCCTGGTGCTGACTACCAGTCAACCAAGCTCCTTGGTC  
BrTT4-3 (404) GCACTACCTCTGGAGTCGACATGCCTGGTGCTGACTACCAGTCAACCAAGCTCCTCGGTC  
BrTT4-4 (401) GCACCACCTCTGGTGTGGACATGCCTGGTGCTGACTACCAGTCAACCAAGCTCCTTGGTC  
BrTT4-5 (401) GCACCACCTCTGGAGTTGACATGCCTGGTGCTTACTACCAGTCAACCAAGCTCCTTGGTC  
BrTT4-6 (398) GTACTACCTCAGGAGTTGACATGCCTGGTGCCGACTACCAGTCAACCAAGCTCCTTGGTC  
BoTT4-1 (404) GCACTACCTCAGGAGTCGACATGCCTGGTGCTGACTACCAGTCAACCAAGCTCCTCGGTC  
BoTT4-2 (407) GCACCACCTCAGGAGTTGACATGCCTGGTGCTGACTACCAGTCAACCAAGCTCCTTGGCC  
BoTT4-3 (407) GTACAACCTCAGGAGTCGACATGCCTGGTGCTGACTACCAGTCAACCAAGCTCCTTGGTC  
BoTT4-4 (404) GCACTACCTCAGGAGTCGACATGCCTGGTGCTGACTACCAGTCAACCAAGCTCCTCGGTC  
BjTT4 (404) GCACTACCTCAGGAGTCGACATGCCTGGTGCTGACTACCAGTCAACCAAGCTCCTCGGTC

AtTT4 (464) TTCGTCTTCCGTCAAGCGTCTCATGATGTACCAGCAAGGTTGCTTCGCCGGCGGTA CTG  
BnTT4A1 (401) TTCGTCTTCCGTCAAGCGTCTCATGATGTACCAGCAAGGCTGCTTCGCCGGCGGTA CTG  
BnTT4A2 (484) TTCGTCTTCCGTCAAGCGTCTCATGATGTACCAGCAAGGTTGCTTCGCCGGCAGCACCG  
BnTT4B1 (535) TTCGCCCTTCCGTGAAGCGTCTCATGATGTACCAGCAAGGTTGCTTCGCCGGCGGCACTG  
BnTT4B2 (538) TTCGTCTTCCGTCAAGCGTCTCATGATGTACCAACAAGGTTGCTTCGCCGGCGGCACTG  
BrTT4-1 (464) TTCGTCTTCCGTCAAGCGTCTCATGATGTACCAGCAAGGCTGCTTCGCCGGCGGTA CTG  
BrTT4-2 (467) TTCGTCTTCCGTCAAGCGTCTCATGATGTACCAGCGGGGTTGCTTCGCAGGCGGCACTG  
BrTT4-3 (464) TTCGTCTTCCGTCAAGCGTCTCATGATGTACCAGCAAGGCTGCTTCGCCGGCGGTA CTG  
BrTT4-4 (461) TGTGTCTTCTGTAAAGCGTGTGATGATGTACCATCAAGGCTGTACGCTGGTGGCACTG  
BrTT4-5 (461) TTCGTCTTCCGTCAAGCGTCTCATGATGTACCAGCAATGTTGCTTCGCCGGCGGCACTG  
BrTT4-6 (458) TTTGTCTTCTGTCAAGCGTCTCATGATGTACCAGCAAGGTTGCTTCGCCGGGGGCACTG  
BoTT4-1 (464) TTCGTCTTCCGTCAAGCGTCTCATGATGTACCAGCAAGGTTGCTTCGCCGGCGGCACTG  
BoTT4-2 (467) TTCGTCTTCCGTCAAGCGTCTCATGATGTACCAACAAGGTTGCTTCGCTGGCGGCACTG  
BoTT4-3 (467) TTCGTCTTCCGTAAAGCGTCTCATGATGTACCAGCAAGGCTGCTTCGCCGGCGGCACTG  
BoTT4-4 (464) TTCGTCTTCCGTCAAGCGTCTCATGATGTACCAGCAAGGTTGCTTCGCCGGCGGCACTG  
BjTT4 (464) TTCGTCTTCCGTCAAGCGTCTCATGATGTACCAGCAAGGCTGCTTCGCCGGCGGTA CTG

AtTT4 (524) TCCTCCGTATCGCTAAGGATCTCGCCGAGAACAACCGTGGAGCACGTGTCCTCGTTGTCT  
BnTT4A1 (461) TCCTCCGTCTCGCTAAGGATCTCGCTGAGAACAACCGTGGCGCGCTGTTCTCGTTGTCT  
BnTT4A2 (544) TCCTCCGTCTCGCCAAGGATCTCGCTGAGAACAACCGTGGCGCGCTGTTCTCGTTGTCT  
BnTT4B1 (595) TCCTCCGTCTCGCCAAGGACCTCGCTGAGAACAACCGTGGCGCACGTGTCCTCGTTGTCT  
BnTT4B2 (598) TCCTCCGTCTCGCCAAGGACCTCGCTGAGAACAACCGTGGCGCACGTGTCCTCGTTGTCT  
BrTT4-1 (524) TCCTCCGTCTCGCCAAGGATCTCGCTGAGAACAACCGTGGCGCGCTGTTCTCGTTGTCT  
BrTT4-2 (527) TCCTCCGTCTCGCCAAGGACCTCGCTGAGAACAACCGTGGCGCACGTGTCCTCGTTGTCT  
BrTT4-3 (524) TCCTCCGTCTCGCTAAGGATCTCGCTGAGAACAACCGTGGCGCGCTGTTCTCGTTGTCT  
BrTT4-4 (521) TCCTCCGTGTGGCTAAGGACATAGCTGAGAACAACCGTGGCGCGCTAGAGTACTTATTGTCT  
BrTT4-5 (521) TCCTCCGTCTCGCCAAGGACCTCGCTGAGAACAACCGTGGCGCACGTGTCCTGGTGGTCT  
BoTT4-1 (518) TCCTCCGTCTCGCCAAGGACCTCGCCGAGAACAACCGTGGCGCACGTGTTCTCGTGTCT  
BoTT4-2 (524) TCCTCCGTCTCGCCAAGGATCTCGCTGAGAACAACCGTGGCGCGCTGTTCTCGTTGTCT  
BoTT4-2 (527) TCCTCCGTCTCGCCAAGGACCTCGCTGAGAACAACCGTGGCGCACGTGTCCTCGTTGTCT  
BoTT4-3 (527) TCCTCCGTCTCGCCAAGGACCTCGCTGAGAACAACCGTGGCGCACGTGTCCTCGTTGTCT  
BoTT4-4 (524) TCCTCCGTCTCGCCAAGGATCTCGCTGAGAACAACCGTGGCGCGCTGTTCTCGTTGTCT  
BjTT4 (524) TCCTCCGTCTCGCTAAGGATCTCGCTGAGAACAACCGTGGCGCGCTGTTCTCGTTGTCT

AtTT4 (584) GCTCTGAGATCACAGCCGTACCTTCCGTGGTCCCTCTGACACCACCTTGACTCCCTCG  
BnTT4A1 (521) GCTCCGAGATCACAGCCGTACGTTCCGTGGCCCATCTGACACCACCTTGACTCCCTCG  
BnTT4A2 (604) GCTCCGAGATCACAGCCGTACGTTCCGTGGCCCTCTGACACCACCTTGACTCCCTCG  
BnTT4B1 (655) GCTCTGAGATCACAGCCGTACCTTCCGTGGCCCTTCTGACACCACCTTGTCTCACTCG  
BnTT4B2 (658) GCTCCGAGATCACAGCCGTACCTTCCGTGGCCCTCTGACACTCACCTTGACTCACTCG  
BrTT4-1 (584) GCTCCGAGATCACAGCCGTACGTTCCGTGGCCCATCTGACACCACCTTGACTCCCTCG  
BrTT4-2 (587) GCTCCGAGATCACAGCCGTACCTTCCGTGGTCCCTCTGACACTCACCTTGACTCCCTCG  
BrTT4-3 (584) GCTCCGAGATCACAGCCGTACGTTCCGTGGCCCATCTGACACCACCTTGACTCCCTCG  
BrTT4-4 (581) GCTCTGAGATTACAGTAGTCACCTTCCGTGGGCCCTCTGAGACCACCTGGATTCCCTTG  
BrTT4-5 (581) GCTCCGAGATCACAGCCGTACCTTCCGTGGCCCTTCTGACACCACCTTGACTCACTCG  
BrTT4-6 (578) GCTCCGAGATCATAGCCCTTCTTCCGTGGCCCTCTGACACCACCTTGATTCCCTCC  
BoTT4-1 (584) GCTCCGAGATCATAGCCGTACGTTCCGTGGCCCTCTGACACCACCTTGACTCCCTCG  
BoTT4-2 (587) GCTCCGAGATCACAGCTGTACGTTCCGTGGCCCTTCTGACACTCACCTTGACTCGCTCG  
BoTT4-3 (587) GCTCCGAGATCACAGCCGTACGTTCCGTGGCCCTCTGACACTCATCTTGACTCCCTCG  
BoTT4-4 (584) GCTCCGAGATCACAGCCGTACGTTCCGTGGCCCTCTGACACCACCTTGACTCCCTCG  
BjTT4 (584) GCTCCGAGATCACAGCCGTACGTTCCGTGGCCCATCTGACACCACCTTGACTCCCTCG

AtTT4 (644) TCGGTACGGCTCTTTTTCAGTGATGGCGCCGCCGCACTCATTGTGGGGTTCGGACCTGACA  
BnTT4A1 (581) TTGGACAGGCTCTCTTTCAGTGACGGCGCCGCCGCGCTCATTGTCCGTTTCGGACCTGACA  
BnTT4A2 (664) TTGGACAGGCTCTCTTTCAGTGACGGCGCCGCCGCGCTCATTGTCCGTTTCGGACCCGGATA  
BnTT4B1 (715) TGGGTCAAGCTCTCTTTCAGCGACGGTGCAGCCGCGCTCATTGTCCGTTTCGGACCTGATG  
BnTT4B2 (718) TGGGACAAGCTCTCTTTCAGTGACGGTGCAGCCGCACTCATTGTCCGTTTCAGACCTGATG  
BrTT4-1 (644) TTGGACAGGCTCTCTTTCAGTGACGGCGCCGCCGCGCTCATTGTCCGTTTCGGACCTGACA  
BrTT4-2 (647) TTGGACAGGCTCTCTTTCAGTGATGGAGCCGCTGCGCTTATCGTTGGTTTCGGATCTGATG  
BrTT4-3 (644) TTGGACAGGCTCTCTTTCAGTGACGGCGCCGCCGCGCTCATTGTCCGTTTCGGACCCGGACA  
BrTT4-4 (641) TTGGACAGTCCCTTTTTCAGTGACGGCGCCGCCGCGCTCATTGTCCGTTTCAGACCTGACA  
BrTT4-5 (641) TGGGACAGGCACTCTTTCAGTGACGGTGCAGCCGCGCTCATTGTCCGTTTCGGACCTGATG  
BrTT4-6 (638) TCGGACAGGCCCTCTTTCAGTGACGGCGCCGCCGCACTCGTTGTCCGTTTCGGACCCGGACA  
BoTT4-1 (644) TTGGACAGGCTCTCTTTCAGTGACGGCGCCGCCGCGCTCATTGTCCGTTTCGGACCCGGATA  
BoTT4-2 (647) TGGGACAGGCCCTCTTTCAGCGACGGTGCAGCCGCGCTCGTTGTCCGTTTCGGACCTGATG  
BoTT4-3 (647) TTGGACAGGCTCTCTTTCAGTGACGGCGCCGCCGCGCTTATTGTCCGTTTCGGATCTGATG  
BoTT4-4 (644) TTGGACAGGCTCTCTTTCAGTGACGGCGCCGCCGCGCTCATTGTCCGTTTCGGACCCGGATA  
BjTT4 (644) TTGGACAGGCTCTCTTTCAGTGACGGCGCCGCCGCGCTCATTGTCCGTTTCGGACCTGACA

AtTT4 (704) CATCTGCTGGAGAGAAACCATCTTTGAGATGGTGTCTGCGGCTCAGACCATCCTTCCAG  
BnTT4A1 (641) TCTCTGCTGGAGAGAAGCCCATCTTTCGAGATGGTGTCTGCGGCCAGACCATCTTACCAG  
BnTT4A2 (724) CCTCTGCTGGAGAGAAGCCCATCTTTCGAGATGGTGTCTGCGGCCAGACCATACTACCAG  
BnTT4B1 (775) TCTCTGCTGGAGAGAAGCCCATCTTTCGAGATGGTGTCTGCTGCTCAGACCATCCTCCAG  
BnTT4B2 (778) TTTCTGCTGGAGAGAAGCCCATCTTTCGAGATGATGTCTGCGGCCAGACCATCCTCCAG  
BrTT4-1 (704) CCTCTGCTGGAGAGAAGCCCATCTTTCGAGATGGTGTCTGCGGCCAGACCATCTTACCAG  
BrTT4-2 (707) CTTCCGTGGGGGAGAAGCCAAATCTTTGAGATGGTGTCTGCGGCTCAGACCATCTTCCCG  
BrTT4-3 (704) CCTCTGCTGGAGAGAAGCCCATCTTTCGAGATGGTGTCTGCGGCCAGACCATCTTACCAG  
BrTT4-4 (701) CCTCTGCTGGGAGAGAAACCAATCTTTGAGATGGTGTCTGCTGCACAGACCATCTTCCCTG  
BrTT4-5 (701) TCTCTGCTGGAGAGAAGCCCATCTTTCGAGATGGTGTCTGCTGCTCAGACCATCCTCCAG  
BrTT4-6 (698) TCTCTGCTGGGAGAGAAACCAATCTTTCGAGATGGTGTCTGCTGCGGCCAGACCATCCTCCAG  
BoTT4-1 (704) CCTCTGCTGGAGAGAAGCCCATCTTTCGAGATGGTGTCTGCGGCCAGACCATACTACCAG  
BoTT4-2 (707) TCTCTGCTGGAGAGAAGCCCATCTTTCGAGATGGTGTCTGCGGCCAAAACCATCCTCCAG  
BoTT4-3 (707) CATCCGTAGGGGAGAAGCCAAATCTTTGAGATGGTGTCTGCGGCCAGACCATCTTCCCG  
BoTT4-4 (704) CCTCTGCTGGAGAGAAGCCCATCTTTCGAGATGGTGTCTGCGGCCAGACCATACTACCAG  
BjTT4 (704) TCTCTGCTGGAGAGAAGCCCATCTTTCGAGATGGTGTCTGCGGCCAGACCATCTTACCAG

AtTT4 (764) ACTCTGATGGTGCCATAGACGGACATTTGAGGGAAGTTGGTCTCACCTTCCATCTCCTCA  
BnTT4A1 (701) ACTCTGACGGTGCCATAGATGGACACTTTGAGGGAAGTGGGACTCACCTTCCATCTCCTCA  
BnTT4A2 (784) ACTCTGACGGTGCCATAGATGGACACTTTGAGGGAAGTGGGACTCACCTTCCATCTCCTCA  
BnTT4B1 (835) ACTCGACGGTGCCATAGATGGACACTTAAAGGGAAGTGGGACTCACCTTCCATCTCCTCA  
BnTT4B2 (838) ACTCGACGGTGCCATCGATGGACACTTTGAGGGAAGTGGGACTCACCTTCCATCTCCTCA  
BrTT4-1 (764) ACTCTGACGGTGCCATAGATGGACACTTTGAGGGAAGTGGGACTCACCTTCCATCTCCTCA  
BrTT4-2 (767) ACTCGATGGAGCCATAGATGGACACTTTGAGGGAAGTGGGACTCACCTTCCATCTCCTCA  
BrTT4-3 (764) ACTCTGACGGTGCCATAGATGGACACTTTGAGGGAAGTGGGACTCACCTTCCATCTCCTCA  
BrTT4-4 (761) ACTCTCAAGGAGCCATAGAAGGACATCTGAAGGAGTGGGACTCACCTTCCATCTCTTAA  
BrTT4-5 (761) ACTCGACGGTGCCATAGATGGACACTTTGAGGGAAGTGGGACTCACCTTCCATCTCCTCA  
BrTT4-6 (758) ACTCGACGGCGTTATAAATTTACAGTTGAGGGAAGCGGGACTCACCTTCCATCTCCTGA  
BoTT4-1 (764) ACTCTGACGGTGCCATAGATGGACACTTTGAGGGAAGTGGGACTCACCTTCCATCTCCTCA



BoTT4-2 (767) ACTCGACGGTGCCATAGATGGACACTTAAAGAGAAGTTGGACTCACCTTCCATCTCCTCA  
 BoTT4-3 (767) ACTCGATGGAGCCATAGATGGACACTTGAGGGAAAGTGGGACTCACCTTCCATCTCCTCA  
 BoTT4-4 (764) ACTCTGACGGTGCCATAGATGGACACTTGAGGGAAAGTGGGACTCACCTTCCATCTCCTCA  
 BjTT4 (764) ACTCTGACGGTGCCATAGATGGACACTTGAGGGAAAGTGGGACTCACCTTCCATCTCCTCA  
  
 AtTT4 (824) AGGATGTTCCCGGCCTCATCTCCAAGAACATTGTGAAGAGTCTAGACGAAGCGTTTAAAC  
 BnTT4A1 (761) AGGACGTCCCTGGACTCATCTCCAAGAACATCGAGAAGAGTCTAGACGAAGCGTTTAAAC  
 BnTT4A2 (844) AGGACGTCCCTGGGCTCATCTCCAAGAACATCGAGAAGAGTCTAGACGAAGCGTTTAAAC  
 BnTT4B1 (895) AGGACGTCCCGGACTCATCTCCAAGAACATTGAGAAGAGTCTAGACGAAGCGTTTAAAC  
 BnTT4B2 (898) AGGACGTCCCTGGACTCATCTCCAAGAACATTGAAAAGAGCCTAGACGAAGCGTTTAAAC  
 BrTT4-1 (824) AGGACGTCCCTGGACTCATCTCCAAGAACATCGAGAAGAGTCTAGACGAAGCGTTTAAAC  
 BrTT4-2 (827) AGGACGTCCCTGGGCTCATCTCCAAGAACATAGAGAAGAGTCTTGAAGAAGCGTTTAAAC  
 BrTT4-3 (824) AGGACGTCCCTGGGCTCATCTCCAAGAACATCGAGAAGAGTCTAGACGAAGCGTTTAAAC  
 BrTT4-4 (821) AGACTGTCCCGGTCTCATCTCCAAGAACATTGAGAAGTGTCTTGAAGAAGCGTTTAAAC  
 BrTT4-5 (821) AGGACGTCCCGGACTCATCTCCAAGAACATTGAGAAGAGTCTAGACGAAGCGTTTAAAC  
 BrTT4-6 (818) AGCACGTCCCTAGGCTCATCTCGAAGAACATTGAAAAGAGTCTACACGAAGCGTTTAAAC  
 BoTT4-1 (824) AGGACGTCCCTGGGCTCATCTCCAAGAACATCGAGAAGAGTCTAGACGAAGCGTTTAAAC  
 BoTT4-2 (827) AGGACGTCCCTGGGCTCATCTCCAAGAACATTGAAAAGAGCCTAGACGAAGCGTTTAAAC  
 BoTT4-3 (827) AGGACGTCCCTGGGCTCATCTCCAAGAACATAGAGAAGAGTCTTGAAGAAGCGTTTAAAC  
 BoTT4-4 (824) AGGACGTCCCTGGGCTCATCTCCAAGAACATCGAGAAGAGTCTAGACGAAGCGTTTAAAC  
 BjTT4 (824) AGGACGTCCCTGGACTCATCTCCAAGAACATCGAGAAGAGTCTAGACGAAGCGTTTAAAC  
  
 AtTT4 (884) CTTTGGGATAAAGTACTGGAACCTCCTCTTCTGGATAGCCACCTGGAGGTCAGCGA  
 BnTT4A1 (821) CGTTAGGTATAAGCGACTGGAACCTCCTCTTCTGGATAGCTCACCTGGTGGTCCAGCGA  
 BnTT4A2 (904) CTTAGGGATAAAGTACTGGAACCTCCTCTTCTGGATAGCTCACCTGGTGGTCCAGCGA  
 BnTT4B1 (955) CTTAGGGATAAAGTACTGGAACCTCCTCTTCTGGATAGCTCACCTGGTGGTCCAGCGA  
 BnTT4B2 (958) CGTTGGGATAAAGTATTGGAACCTCCTCTTCTGGATAGCTCACCTGGTGGTCCAGCGA  
 BrTT4-1 (884) CGTTAGGTATAAGCGACTGGAACCTCCTCTTCTGGATAGCTCACCTGGTGGTCCAGCGA  
 BrTT4-2 (887) CGCTAGGGATAAAGTACTGGAACCTCCTCTTCTGGATAGCTCACCTGGTGGTCCAGCGA  
 BrTT4-3 (884) CGTTAGGTATAAGCGACTGGAACCTCCTCTTCTGGCTAGCTCACCTGGTGGTCCAGCGA  
 BrTT4-4 (881) CGCTGGGATAAAGTACTGGAACCTCTCTTCTGGATAGCTCACCTGGAGGCTCCGCA  
 BrTT4-5 (881) CTTAGGGATAAAGTACTGGAACCTCCTCTTCTGGATAGCTCACCTGGTGGTCCAGCGA  
 BrTT4-6 (878) CGCTGGGATAAAGCGACTGGAACCTCCTCTTCTGGATAGCCATCCTGGTGGTCCAGCGA  
 BoTT4-1 (884) CTTAGGGATAAAGCGACTGGAACCTCCTCTTCTGGATAGCTCACCTGGTGGTCCAGCGA  
 BoTT4-2 (887) CGTTGGGATAAAGTACTGGAACCTCCTCTTCTGGATAGCCACCTGGTGGTCCAGCGA  
 BoTT4-3 (887) CGCTAGGGATAAAGTACTGGAACCTCCTCTTCTGGATCGCTCACCTGGTGGTCCAGCGA  
 BoTT4-4 (884) CTTAGGGATAAAGCGACTGGAACCTCCTCTTCTGGATAGCTCACCTGGTGGTCCAGCGA  
 BjTT4 (884) CGTTAGGTATAAGCGACTGGAACCTCCTCTTCTGGATAGCTCACCTGGTGGTCCAGCGA  
  
 AtTT4 (944) TCCTAGACCAGGTGGAGATAAAGCTAGGACTAAAGGAAGAGAAGATGAGGGCCACACGTC  
 BnTT4A1 (881) TCCTTGACGAGGTTGAGAAGAAGCTAGGGCTCAAGGCGGAGAAGATGAGAGCCACGCGCC  
 BnTT4A2 (964) TCCTTGACGACGTTGAGAAGAAGCTAGGGCTCAAGGCTGAGAAGATGAGAGCCACGCGTC  
 BnTT4B1 (1015) TCCTTGACGACGTTGAGAAGAAGCTAGGACTCAAGGCAGAGAAGATGAGAGCCACGCGTC  
 BnTT4B2 (1018) TCCTTGACGACGTTGAGAAGAAGCTAGGACTCAAGGCAGAGAAGATGAGAGCCACGCGTC  
 BrTT4-1 (944) TCCTTGACGAGGTTGAGAAGAAGCTAGGGCTCAAGGCGGAGAAGATGAGAGCCACGCGTC  
 BrTT4-2 (947) TACTTGACGAGGTTGAGAAGAAGCTAGGACTCAAGGCAGAGAAGATGAGAGCCACGCGTC  
 BrTT4-3 (944) TCCTTGACGAGGTTGAGAAGAAGCTAGGGCTCAAGGCGGAGAAGATGAGAGCCACGCGCC  
 BrTT4-4 (941) TCTTGACCAAGTTGAGATAAAGCTAGGACTGAAGCCAGAGAAGATGAAGGCCACTCGTC  
 BrTT4-5 (941) TCCTTGACGACGTTGAGAAGAAGCTAGGACTCAAGGCAGAGAAGATGAGAGCCACGCGTC  
 BrTT4-6 (938) TCCTTGATGAGGTTGAGAAAAGCTAGGACTCAAGGCAGAGAAGCTGAGGGCCACACGTC  
 BoTT4-1 (944) TCCTTGACGAGGTTGAGAAAAGCTAGGGCTCAAGGCTGAGAAGATGAGAGCCACGCGTC  
 BoTT4-2 (947) TCCTTGACGACGTTGAGAAGAAGCTAGGACTCAAGGCAGAGAAGATGAGAGCCACGCGTC  
 BoTT4-3 (947) TCCTTGACGAGGTTGAGAAGAAGCTTGGACTCAAGGCAGAGAAGATGAGAGCCACGCGTC  
 BoTT4-4 (944) TCCTTGACGAGGTTGAGAAAAGCTAGGGCTCAAGGCTGAGAAGATGAGAGCCACGCGTC  
 BjTT4 (944) TCCTTGACGAGGTTGAGAAGAAGCTAGGGCTCAAGGCGGAGAAGATGAGAGCCACGCGCC  
  
 AtTT4 (1004) ACGTGTGAGCGAGTATGGAACATGTGAGCGCGTGCCTTCTCTTACTACTAGACGAGA  
 BnTT4A1 (941) ACGTGTGAGCGAGTACGGTAACATGTCTAGCGCGTGTGTTCTCTTACTATTGGACGAGA  
 BnTT4A2 (1024) ACGTGTGAGCGAGTACGGAACATGTCTAGCGCCTGTGTCTCTTACTATTGGATGAGA  
 BnTT4B1 (1075) ACGTGTGAGCGAGTATGGAACATGTCTAGCGCCTGTGTCTCTTACTATTGGATGAGA  
 BnTT4B2 (1078) ACGTGTGAGCGAGTATGGTAACATGTCTAGCGCCTGCCTCTTACTACTGGATGAGA  
 BrTT4-1 (1004) ACGTGTGAGCGAGTACGGTAACATGTCTAGCGCCTGTGTTCTCTTACTATTGGACGAGA  
 BrTT4-2 (1007) ACGTGTGAGTGTGAGTACGGAACATGTGAGCGCGTGCCTTCTCTTACTATTGGATGAGA

BrTT4-3 (1004) ACGTGTGAGCGAGTACGGTAACATGTCTAGCGCGTGTGTTCTCTTCATATTGGACGAGA  
 BrTT4-4 (1001) ATGTCCTCAGCGAGTATGGAAACATGTCTAGTGCCTGTGTCTTCTTCATACTTGACGAGA  
 BrTT4-5 (1001) ACGTGTGAGCGAGTATGGAAACATGTCTAGCGCCTGTGTCTTCTTATATTGGATGAGA  
 BrTT4-6 (998) ACGTGTGAGCGAGTACGGAAACATGACGAGCGCGTGCCTCTTCATATTGGACGAGA  
 BoTT4-1 (1004) ACGTGTGAGCGAGTACGGTAACATGTCTAGCGCGTGTGTTCTCTTCATATTGGACGAGA  
 BoTT4-2 (1007) ACGTGTGAGCGAGTATGGTAACATGTCTAGCGCCTGCGTCTTCTTATATTGGATGAGA  
 BoTT4-3 (1007) AGGTCTGAGCGAGTACGGAAACATGTCTAGCGCGTGCCTCTCTTATATTGGACGAGA  
 BoTT4-4 (1004) ACGTGTGAGCGAGTACGGTAACATGTCTAGCGCGTGTGTTCTCTTCATATTGGACGAGA  
 BjTT4 (1004) ACGTGTGAGCGAGTACGGTAACATGTCTAGCGCGTGTGTTCTCTTCATATTGGACGAGA  
  
 AtTT4 (1064) TGAGGAGGAAGTCTAGCTAAGGATGGTGTGGCCACGACAGGAGAAGGTTGGAGTGGGGTG  
 BnTT4A1 (1001) TGAGGAGGAAGTCTGCGGAAGATGGTGTGGCCACGACAGGAGAAGGTTGGAGTGGGGTG  
 BnTT4A2 (1084) TGAGGAGGAAGTCTACGGAAGATGGTGTGGCCACGACAGGAGAAGGTTAGAATGGGGTG  
 BnTT4B1 (1135) TGAGGAGGAAGTCTAAGGAAGATGGTGTGGCCACGACAGGTGAAGGTTAGAATGGGGTG  
 BnTT4B2 (1138) TGAGGAGGAAGTCTGTGGAAGATGGCTAGCCACGACAGGTGAAGGTTGGAGTGGGGTG  
 BrTT4-1 (1064) TGAGGAGGAAGTCTGCGGAGGATGGTGTGGCCACGACAGGAGAAGGTTGGAGTGGGGTG  
 BrTT4-2 (1067) TGAGGAGGAAGTCTAGCGAAAGATGGTGTGGCCACGACGGGAGAAGGTTGGAGTGGGGTG  
 BrTT4-3 (1064) TGAGGAGGAAGTCTGCGGAAGATGGTGTGGCCACGACAGGAGAAGGTTGGAGTGGGGTG  
 BrTT4-4 (1061) TGAGGAGGAAGCGGTAGAGGATGGTGCAGAGACACAGGAGAAGGTTGGAGTGGGGTG  
 BrTT4-5 (1061) TGAGGAGGAAGTCTAAGGAAGATGGTGTGGCCACGACAGGTGAAGGTTAGAATGGGGTG  
 BrTT4-6 (1058) TGAGGAGGAAGTCCGCCAAGATGGTGTGGCCACGACAGGAGAAGGTTGGAGTGGGGTG  
 BoTT4-1 (1064) TGAGGAGGAAGTCTAGCGGAAGATGGTGTGGCTACGACAGGAGAAGGTTGGAGTGGGGTG  
 BoTT4-2 (1067) TGAGGAGGAAGTCTGTGGAAGATGGTGTGGCCACGACAGGTGAAGGTTGGAGTGGGGTG  
 BoTT4-3 (1067) TGAGGAGGAAGTCTGCGAAAGATGGTGTGGCTACGACGGGAGAAGGTTGGAGTGGGGTG  
 BoTT4-4 (1064) TGAGGAGGAAGTCTAGCGGAAGATGGTGTGGCCACGACAGGAGAAGGTTGGAGTGGGGTG  
 BjTT4 (1064) TGAGGAGGAAGTCTGCGGAAGATGGTGTGGCCACGACAGGAGAAGGTTGGAGTGGGGTG  
  
 AtTT4 (1124) TCTTGTGTTGGTTTCGGACCAGGTCTCACTGTTGAGACAGTCTGTTGCACAGCGTTCCTC  
 BnTT4A1 (1061) TCTTGTGTTGGTTTCGGACCAGGTCTTACCGTAGAGACAGTGGTCTTGCACAGCGTTCCTC  
 BnTT4A2 (1144) TCTTGTGTTGGTTTCGGACCAGGTCTTACTGTAGAGACAGTGGTCTTGCACAGCGTTCCTC  
 BnTT4B1 (1195) TCTTGTGTTGGTTTCGGACCAGGTCTCACCGTGGAGACAGTGTCTTGCACAGCGTTCCTC  
 BnTT4B2 (1198) TCCTGTTTGGGTTTCGGACCAGGTCTCACCGTGGAGACAGTGTCTTGCACAGCGTTCCTC  
 BrTT4-1 (1124) TCTTGTGTTGGTTTCGGACCAGGTCTTACCGTAGAGACAGTGGTCTTGCACAGCGTTCCTC  
 BrTT4-2 (1127) TCTTGTGTTGGTTTCGGACCAGGTCTCACCGTAGAGACTGTTGTCTTGCACAGCGTTCCTG  
 BrTT4-3 (1124) TCTTGTGTTGGTTCGGACCAGGTCTTACCGTAGAGACAGTGGTCTTGCACAGCGTTCCTG  
 BrTT4-4 (1121) TCTTGTGTTGGTTTCGGACCTGGTCTCACTGTAGAGACAGTGGTCTTACACAGTGTTCCTC  
 BrTT4-5 (1121) TCTTGTGTTGGGTTTCGGACCAGGTCTCACCGTGGAGACAGTGTCTTACACAGCGTTCCTG  
 BrTT4-6 (1118) TCTTGTGTTGGTTTCGGACCAGGTCTCACTGTTGAGACACTAGTCTTGCACAGCGTTCCTC  
 BoTT4-1 (1124) TCTTGTGTTGGTTTCGGACCAGGTCTTACTGTAGAGACAGTGGTCTTGCACAGCGTTCCTC  
 BoTT4-2 (1127) TCCTGTTTGGGTTTCGGACCAGGTCTCACCGTGGAGACAGTGTCTTACACAGCGTTCCTG  
 BoTT4-3 (1127) TCTTGTGTTGGTTTCGGACCTGGTCTCACCGTAGAGACTGTTGTCTTGCACAGCGTTCCTG  
 BoTT4-4 (1124) TCTTGTGTTGGTTTCGGACCAGGTCTTACTGTAGAGACAGTGGTCTTGCACAGCGTTCATG  
 BjTT4 (1124) TCTTGTGTTGGTTCGGACCAGGTCTTACCGTAGAGACAGTGGTCTTGCACAGCGTTCCTC

AtTT4 (1184) TCTAA  
 BnTT4A1 (1121) TCTAA  
 BnTT4A2 (1204) TCTAA  
 BnTT4B1 (1255) TCTAA  
 BnTT4B2 (1258) TCTA-  
 BrTT4-1 (1184) TCTAA  
 BrTT4-2 (1187) TTTGA  
 BrTT4-3 (1184) TTTGA  
 BrTT4-4 (1181) TCTGA  
 BrTT4-5 (1181) TCTAA  
 BrTT4-6 (1178) TTTGA  
 BoTT4-1 (1184) TCTAA  
 BoTT4-2 (1187) TCTAA  
 BoTT4-3 (1187) TTTGA  
 BoTT4-4 (1184) TTTGA  
 BjTT4 (1184) TCTAA

4. BnTT5

AtTT5 (1) -----ATGTCTTCATCCAACGCCTGCGCCTCTCCGTACCGTTCCCGCC

BnTT5 (1) -----G  
 BrTT5-1 (1) -----ATGTCTTCATCC-----AACTGTCCGTCACCGTTACCCACC  
 BrTT5-2 (1) -----ATGTCTTCATCC-----AACTGTCCGTCACCGTTACCCACC  
 BrTT5-3 (1) -----ATGTCTTCTCC-----CACTGTCCAACACCGTTACCCCTCC  
 BrTT5-4 (1) -----ATGTCTTCTCC-----AACTGTCCGTCACCGTTACCCACC  
 BrTT5-5 (1) -----ATGTTTTCTTCC-----GGCATTACAGACACCGTTACCCCTCC  
 BrTT5-6 (1) -----ATGTTTTCTTCC-----GGCTCTCAGTTACCGTTACCCCTCC  
 BoTT5-1 (1) -----ATGTCTTCTTCC-----CACTGTCCAACACCGTTACCCCTCC  
 BoTT5-2 (1) -----ATGTTTTCTTCC-----GGCTCTCAGTTACCGTTACCCCTAT  
 BoTT5-3 (1) -----ATGTCTTCTTCC-----AACTGTCCGTCACCGTTACCCACC  
 BoTT5-4 (1) ATGTTTGATCAAATCATATTTCTTCC-----GGCGTTACGTCACCGTTACCCCTCC  
 BjTT5 (1) -----ATGTCTTCATCC-----AACTGTCCGTCACCGTTACCCCTCC

AtTT5 (46) GTCACGAAGCTTTCATGTAGACTCCGTCACGTTTGTACCGTCCGTC AAGTCACCGGCTCC  
 BnTT5 (2) GTGGCGCAGGTTTCGACTACGCTTGCCCTTCTTTTTTTCTTTTTCTTTTAAATCTATGATGT  
 BrTT5-1 (37) GTCACGAAACTTCAAGTTGATTCCGTTACTTTTCCACCGTCCGTCATCTCACC GGCTTCC  
 BrTT5-2 (37) GTCACGAAACTTCAAGTTGATTCCGTTACTTTTCCACCGTCCGTCATCTCACC GGCTTCC  
 BrTT5-3 (37) GTCACCAAACCTTCAAGTAGACTCCGTTACTTTTCAACCCTCAGTCATCTCACC GGCTTCC  
 BrTT5-4 (37) GTCACGAAACTTCAAGTTGATTCCGTTACTTTTCCACCGTCTGTTCATCTCACC GGCTTCC  
 BrTT5-5 (37) GTCACGAATCTTCAAGTTGAATCCGTTAACTTTTCCACCGTCCGTCATCTCACC GGCTTCC  
 BrTT5-6 (37) GTCACGAATCTTCAAGTTGATTCCGTTAACTTTTCCACCGTCCGTCATCTCACC GGCTTCC  
 BoTT5-1 (37) GTCACCAAACCTTCAAGTAGACTCCGTTACTTTTCCACCGTCCGTCATCTCACC GGCTTCC  
 BoTT5-2 (37) GTCACGAATCTTCAAGTTGATTCCGTTAACTTTTCCACCGTCCGTCATCTCACC GGCTTCC  
 BoTT5-3 (37) GTCACGAATCTTCAAGTTGATTCCGTTAACTTTTCCACCGTCCGTCATCTCACC GGCTTCC  
 BoTT5-4 (52) GTCACGAATCTTCAAGTTGATTCCGTTAACTTTTCCACCGTCCGTCATCTCACC GGCTTCC  
 BjTT5 (37) GTCACCAAACCTTCAAGTAGACTGCGTTACTTTTCCACCGTCCGTCATCTCACC GGCTTCC

AtTT5 (106) TCCAATCCATTATTCCTCGGCGGCGCGGTTGTCCGAGGCCTTGATATCCAAGGTA---AA  
 BnTT5 (62) TTATTTTATTTTTATTTTTTCTACGCA**GGTGTGCGAGGTTTGGATAT**CCACGGAA---AA  
 BrTT5-1 (97) TCCAACCTCTCTTCTCGGTGGCGCAGGTGTGCGAGGTTTGGATATCCAAGGAA---AG  
 BrTT5-2 (97) TCCAACCTCTCTTCTCGGTGGCGCAGGTGTGCGAGGTTTGGATATCCAAGGAA---AG  
 BrTT5-3 (97) TCCAATCCCCTCTTCTCGGTGGCGCAGGTGTGCGAGGTTTGGATATCCAAGGAA---AG  
 BrTT5-4 (97) TCCAACCTCTCTTCTCGGTGGCGCAGGTGTGCGAGGTTTGGATATCCAAGGAA---AG  
 BrTT5-5 (97) TCCAACCGACTCTTCTCGCTGGCGCAGGTGTGCAAGGTTTGGATATCCAAGGAG---AT  
 BrTT5-6 (97) TCCAACCTCTCTTCTCGGTGGCGCAGGTGTGCGAGGTTTGGATATCCAAGGAA---AA  
 BoTT5-1 (97) TCCAATCCCCTCTTCTCGGTGGCGCAGGTGTGCGAGGTTTGGATATCCAAGGAA---AA  
 BoTT5-2 (97) TCCAACCTCTCTTCTCGGTGGCGCAGGTGTGCGAGGTTTGGATATCCAAGGAA---AA  
 BoTT5-3 (97) TCCAACCTCTCTTCTCGGTGGCGCAGGTGTGCGAGGTTTGGATATCCAAGGAA---AA  
 BoTT5-4 (112) TCCAATCGACTCTTCTCGCTGGCGCAGGTGTGCAAGGTTTGGATATCCAAGGAG---AG  
 BjTT5 (97) TCCAATCCCCTCTTCTCGGTGGCGCAGGTGTGCGAGGTTTGGATATCCAAGGAA---AA

AtTT5 (163) TTCGTGATCTTACCCTCATTTGGAGTATACCTAGAGGGTAACGCCGTTCCCTTCTCTATCT  
 BnTT5 (119) TTCGTGATCTTACCCTCATCGGTGTTTACCTAGATGCTGTCCCGTCCCCTCCTTTCC  
 BrTT5-1 (154) TTTGTGATCTTACCCTCATCGGAGTTTACCTTGTATCCTGTCTCCGTCACGTCACCTCTCC  
 BrTT5-2 (154) TTTGTGATCTTACCCTCATCGGAGTTTACCTTGTATCCTGTCTCCGTCACGTCACCTCTCC  
 BrTT5-3 (154) TTCGTGATCTTACCCTCATCGGTGTTTACCTAGATGCTGTCCCGTCCCCTCCTTTCC  
 BrTT5-4 (154) TTTGTGATCTTACCCTCATCGGAGTTTACCTTGTATCCTGTCTCCGTCACGTCACCTCTCC  
 BrTT5-5 (154) TTTGTGATCTTACCCTCATCGGAGTTTACCTAGATCCTAACGCCCTTAGAGGGACTTCCC  
 BrTT5-6 (157) TTTGTGATCATCACCTTCTTCCGCGTTTACCTAGATCCTGTGGCCGTCCCCTTACTCTCC  
 BoTT5-1 (154) TTCGTGATCTTACCCTCATCGGTGTTTACCTAGATGCTGTCCCGTCCCCTCCTTTCC  
 BoTT5-2 (157) TTTGTGATCATCACCTTCTTCCGAGTTTACCTAGATCCTGTGGCCGTCCCCTTACTCTCC  
 BoTT5-3 (154) TTCGTGATCTTACCCTCATCGGAGTTTACCTAGATCCTGTCTCCGTCACGTCACCTCTCC  
 BoTT5-4 (169) TTTGTGATCTTACCCTCATCGGAGTTTACCTAGATCCTAACGCCCTTAGGGAGCCTTACC  
 BjTT5 (154) TTCGTGATCTTACCCTCATTTGGAGTCTACCTAGATGCTGTCTCCGTCACGTCACCTCTCC

AtTT5 (223) G--TCAAGT-GGAAGGGA AAAACTACGGAGGAGCTAACAGAATCTATCCCGTTCCTCCGT  
 BnTT5 (179) G--TTAAGT-GGAAAGGCAA AACACACAGAGGAG**GCTAACAGAATCCGTCCTTTT**CCCGT  
 BrTT5-1 (214) G--TTAAGT-GGAAAGGTA AAAACGACAGAGGAGTTAACGGAATCCGTCCTTTCTTCCGT  
 BrTT5-2 (214) G--TTAAGT-GGAAAGGTA AAAACGACAGAGGAGTTAACGGAATCCGTCCTTTCTTCCGT  
 BrTT5-3 (214) G--TTAAGT-GGAAAGGCAA AACACACAGAGGAGCTAACAGAATCCGTCCTTTCTTCCGT  
 BrTT5-4 (214) G--TTAAGT-GGAAAGGTA AAAACGACAGAGGAGTTAACGGAATCCGTCCTTTCTTCCGT  
 BrTT5-5 (214) TTTTGC GGT-----ACGACAGAGGAGTTAGCGGAATCCGTCCTTTCTTCCGT  
 BrTT5-6 (217) G--TTAAGT-GGAAAGGTA AAAACGACGGAGGAGTTAATGGAATCCGTCCTTTCTTCCGT

BoTT5-1 (214) G--TTAAGT-GGAAAGGCAAAACCACAGAGGAGCTAACAGAATGCGTCCCTTTTTTCCGT  
BoTT5-2 (217) G--TTAAGT-GGAAAGGTAAAACGACGGAGGAGTTAATGGAATCCGTCCCTTTCTCCGT  
BoTT5-3 (214) G--TTAAGT-GGAAAGGTAAAACGACAGAGGAGTTAACGGAATCCGTCCCTTTCTCCGT  
BoTT5-4 (229) TCTTTCGGTTGGGGATGCAAAACGACAGAGGAGTTAACGGAATCCGTCAATTTCTCCGT  
BjTT5 (214) G--TTAAGT-GGAAAGGCAAAACCACAGAGGAGCTAACGGAGTCCGTCCCTTTTTTCCGT

AtTT5 (280) GAAATAGTCACCGGTGCGT--TTGAGAAGTTTATCAAGGTGACAATGAAACTGCCGTAA  
BnTT5 (236) GAAATCGTCACGGGTACTTCTTACACCCTTACTTAAGACACACGTCATATGACTTATA  
BrTT5-1 (271) GAAATCGTCACAGGTTCGT--TTGAGAAATTCATCAAAGTGACGATGAAGCTGCCGTAA  
BrTT5-2 (271) GAAATCGTCACAGGTTCGT--TTGAGAAATTCATCAAAGTGACGATGAAGCTGCCGTAA  
BrTT5-3 (271) GAAATCGTCACGGGTTCGT--TTGAGAAGTTTATTAAGGTGACGATGAAGCTACCCTAA  
BrTT5-4 (271) GAAATCGTCACAGGTTCGT--TTGAGAAATTCATCAAAGTGACGATGAAGCTGCCGTAA  
BrTT5-5 (262) CAAATCGTCACAGGTTCCTT--TTGAGAAATTCATTAAGGTGACGATGAAACTCCCCTAA  
BrTT5-6 (274) GAAGTCGTACAGGTACTT--TTGAGAAACTCATTAAGGTGATGATGAGAGTGCCTTAC  
BoTT5-1 (271) GAAATCGTCACGGGTTCGT--TTGAGAAGTTTATTAAGGTGACGATGAAGCTACCCTAA  
BoTT5-2 (274) GAAGTCGTACAGGTACTT--TTGAGAAATTCATCAAAGTGACGATGAGAGTGCCTTAC  
BoTT5-3 (271) GAAATCGTCACAGGTTCGT--TTGAGAAATTCATCAAAGTGACGATGAAGCTGCCGTAA  
BoTT5-4 (289) CATAICGTACAGGTTCCTT--TTGAGAAATTCATTAAGGTGACGATGAAACTGCCGTAA  
BjTT5 (271) GAAATCGTTACAGGTTCGT--TTGAGAAGTTTATCAAGGTACGATGAAACTGCCGTAA

AtTT5 (338) CGGGACAACAATATTCGGAGAAAGTGACGGAGAATTGTGTGGCTATATGGAACAATTAG  
BnTT5 (296) TCAAAGTGTTCCTTTTGTAGAAAGCTAC---GTCATATCAAAGTGTTTTAAAGTAATAAG  
BrTT5-1 (329) CGGGACAACAATATTCGGAGAAAGTAACGGAGAACTGTGTGGCGATATGGAATCGTTAG  
BrTT5-2 (329) CGGGACAACAATATTCGGAGAAAGTAACGGAGAACTGTGTGGCGATATGGAATCGTTAG  
BrTT5-3 (329) CAGGACAGCAGTATTCAGAGAAAGTAACGGAGAACTGTGTGGCGATATGGAATCGTTAG  
BrTT5-4 (329) CGGGACAACAATATTCAGAGAAAGTAACGGAGAACTGTGTGGCGATATGGAATCGTTAG  
BrTT5-5 (320) CGGGACAGCAATATTCGGAGAAAGTAACAGAGAATTGTGAGGCAATTTGGGAATCGTTAG  
BrTT5-6 (332) CGGGACAACTATATTCACAGATAATAACGGGGACCTCTGTGAAGATATGGAATCGTTAG  
BoTT5-1 (329) CAGGACAGCAGTATTCAGAGAAAGTAACGGAGAACTGTGTGCGCATCTGGAATCGTTAG  
BoTT5-2 (332) CGGGACAACTATATTCACAGACAGTAACGGGGACCTTTGTGGAGATATGGAATCGTTAG  
BoTT5-3 (329) CGGGACAACAATATTCAGAGAAAGTAACGGAGAACTGTGTGGCGATATGGAATCGTTAG  
BoTT5-4 (347) CGGGACAGCAATATTCGGAGAAAGTAACAGAGAACTGTGAGGCAATTTGGGAATCGTTAG  
BjTT5 (329) CGGGACAGCAATATTCGGAGAAAGTAACAGAGAACTGTGTGGCGATTTGGAATCGTTAG

AtTT5 (398) GG--CTTTATACGGACTGTGAA-----  
BnTT5 (353) GGCCATTTGTATTGACCGTCATTA-----  
BrTT5-1 (389) GG--ATTTACACAGACTCTGAG-----  
BrTT5-2 (389) GG--ATTTACACAGACTCTGAG-----  
BrTT5-3 (389) GT--ATTTACACAGACTCTGAA-----  
BrTT5-4 (389) GG--ATTTACACAGACTCTGAG-----  
BrTT5-5 (380) GG--ATAAACGCGTACTCTGACTCTCACATCTGTGAAGACTGTGATCCTCCTCCCGTGC  
BrTT5-6 (392) GG--ATTTACACATACTCTGAG-----G-----  
BoTT5-1 (389) GT--ATTTACACAGATTCTGAA-----  
BoTT5-2 (392) GG--ATTTACACAGACTCTGAG-----G-----  
BoTT5-3 (389) GG--ATTTACACAGACTCTGAG-----  
BoTT5-4 (407) GG--ATAAATCAAATCTCTGAC-----AT-----AAG-CTGTGGTCTCCTCCAGTGC  
BjTT5 (389) GT--ATCTACACAGACGCTGAA-----

AtTT5 (418) -----GC  
BnTT5 (377) -----ATTAA  
BrTT5-1 (409) -----GC  
BrTT5-2 (409) -----GC  
BrTT5-3 (409) -----GC  
BrTT5-4 (409) -----GC  
BrTT5-5 (438) AAAACTTCGTTTTTAAACAAGATCACTAAAACATTTGGTCCATATCGGCACTACTCTAGGGG  
BrTT5-6 (413) -----C  
BoTT5-1 (409) -----GC  
BoTT5-2 (413) -----C  
BoTT5-3 (409) -----GC  
BoTT5-4 (453) AAAACTTCGTTTTTAAACAAGATCACTAAAACATTTGGTCCATCTCGGCACTATTCTAGGGG  
BjTT5 (409) -----GC

AtTT5 (420) TAAAGCTGTGGAGAAGTTCTTGGAGATCTTCAAGGAAGAAACATTCCTCCCGGTTTCATC

BnTT5 (382) TAACCTTTTCGTTTAACTCTTAATTAGGTTCC--GTTTGAGAAGTTTATTAAGGTGACGAT  
BrTT5-1 (411) TAAAGCTGTGGAGAGGTTTCAAGGACGAAACGTTCCCTCCTGGTGCTTC  
BrTT5-2 (411) TAAAGCTGTGGAGAGGTTTCAAGGACGAAACGTTCCCTCCTGGTGCTTC  
BrTT5-3 (411) TAAAGCTGTGAAGAAGTTTGGAGGTTTCAAGGACCAAACGTTCCCTCCTGGTGCTTC  
BrTT5-4 (411) TAAAGCTGTGGAGAGGTTTGGAAAGTCTTCAAGGACGAAACGTTCCCTCCTGGTGCTTC  
BrTT5-5 (498) TCATGCTGTGGTGAAGTTTCTGGAATCTTCAAGCACAAAAAGTTCCCTCCTGGTGCTTC  
BrTT5-6 (414) TAAAGCAGTGGAGAGGTTTGGAAAGTCTTCAAGGACGAAACGTTCCCTCCTGGTGCTTC  
BoTT5-1 (411) TAAAGCTGTGAAGAAGTTTGGAGGTTTCAAGGACCAAACGTTCCCTCCTGGTGCTTC  
BoTT5-2 (414) TAAAGCAGTGGAGAGGTTTGGAAAGTCTTCAAGGACGAAACGTTCCCTCCTGGTGCTTC  
BoTT5-3 (411) TAAAGCTGTGGAGAGATTGGAAAGTCTTCAAGGACGAAACGTTCCCTCCTGGTGCTTC  
BoTT5-4 (513) TCAAGCTGTGAAGAAGTTTCTGGAATCTTCAAGCCAAAAAGTTCCCTCCTGGTGCTTC  
BjTT5 (411) TAAAGCTGTGGAGAGGTTTGGAGGTTTCAAGGACCAAACGTTCCCTCCTGGTGCTTC

AtTT5 (480) GATCCTCTTCGCTCTCTCCCTACCAGGCTCTCTTACGTTGCGTTTTTCGAAAGATGATAG  
BnTT5 (440) GAAGCTAC-CGTTAACAGGACAGCAGTAT-TCAGAG-----  
BrTT5-1 (471) CATCCTCTTCGCTCTCTCCCTGAAGGCTCTCTTACGTTGCGTTTTTCGAAAGATGATAG  
BrTT5-2 (471) CATCCTCTTCGCTCTCTCCCTGAAGGCTCTCTTACGTTGCGTTTTTCGAAAGATGATAG  
BrTT5-3 (471) GATTCTCTTGGCTCTCTCCCTAACGGCTCTCTCAGATTGCGTTTTTCGAAAGACGATAG  
BrTT5-4 (471) CATCCTCTTCGCTCTCTCCCTGAAGGCTCTCTTACGTTGCGTTTTTCGAAAGATGATAG  
BrTT5-5 (558) CATCCTCTTCGCTTTCTCCCTAAAGGCTCTCTTACGTTGCGTTTTTCGAGTGATGATGG  
BrTT5-6 (474) CATCCTCTTCGCTCTCTCCCTGAAGGCTCTCTTACGATTGCGTTTTTCGAAAGACGATAG  
BoTT5-1 (471) GATTCTCTTGGCTCTCTCCCTAACGGCTCTCTCAGATTGCGTTTTTCGAAAGACGATAG  
BoTT5-2 (474) AATCCTCTTCGCTCTCTCCCTGAAGGCTCTCTTACGATTGCGTTTTTCGAAAGACGATAA  
BoTT5-3 (471) CATCCTCTTCGCTCTCTCCCTAACGGCTCTCTTACGTTGCGTTTTTCGAAAGATGATAG  
BoTT5-4 (573) CATCCTCTTCGCTATCTCCCTAAAGGCTCTCTTACGTTGCGTTTTTCGAATGATGATGG  
BjTT5 (471) GATCCTCTTGGCTCTCTCCCTAACGGCTCTCTCAGATTGCGTTTTTCGAAAGACGATAG

AtTT5 (540) TATCCCTGAAACCGGATCGCTGTGATCGAGAACAATGTTGGCGGAGGC-GGTTCTGG  
BnTT5 (474) -----  
BrTT5-1 (531) CATTCTGAAACGGGAAAAGTGGTTATTGAAAACAAGTTGTTGGCAGAGGC-AGTTCTTG  
BrTT5-2 (531) CATTCTGAAACGGGAAAAGTGGTTATTGAAAACAAGTTGTTGGCAGAGGC-AGTTCTTG  
BrTT5-3 (531) TATTCTAAAACCGGAAAAGCCGTAATCGAGAATAAATTGTTGGCAGAGGC-A-----  
BrTT5-4 (531) CATTCTGAAACGGGAAAAGTGGTTATTGAAAACAAGTTGTTGGCAGAGGC-AGTTCTTG  
BrTT5-5 (618) CATTCTAAAAGAGGAAAACACAGCGATCGAGAATAAAGTTTTTGGCAGAGGC-AATTCTTG  
BrTT5-6 (534) CATTCCGAAACGGGAAAAGCGGTGATCGAAAACAAGTTGTTGACAGAGGCCAGTTCTTG  
BoTT5-1 (531) TATTCTAAAACCGGAAAAGCCGTAATCGAGAATAAATTGTTGGCAGAGGC-AGTTCTTG  
BoTT5-2 (534) CATTCTGAAACGGGAAAAGCGGTGATCGAAAACAAGTTGTTGGCAGAGGC-AGTTCTTG  
BoTT5-3 (531) CATTCTGAAACGGGAAAAGCGGTGATCGAAAACAAGTTGTTGGCAGAGGC-AGTTCTTG  
BoTT5-4 (633) CATTCTAAAAGAGGAAAACACAGCGATCGAGAATAAAGTTTTTGGCAGAGGC-AGTTCTTG  
BjTT5 (531) TATTCTAAAACCGGAAAAGCCGGTGATCGAGAATAAATTGTTGGCAGAGGC-AGTTCTTG

AtTT5 (599) AATCTATCATCGGAAGAACGGTGTGTCACCTGGCACTAGGTTAAGTGTTCAGAAAAGAT  
BnTT5 (474) -----  
BrTT5-1 (590) AATCGATCATTGGAAGAACGGTGTGTCTCCTGGGGCTAGGTTGAGTGTTCGCGAGAGAT  
BrTT5-2 (590) AATCGATCATTGGAAGAACGGTGTGTCTCCTGGGGCTAGGTTGAGTGTTCGCGAGAGAT  
BrTT5-3 (583) -----  
BrTT5-4 (590) AATCGATCATTGGAAGAACGGTGTGTCTCCTGGGGCTAGGTTGAGTGTTCGCGAGAGAT  
BrTT5-5 (677) AATCAATCATTGGAAGAACGGTGTGTCTCCTGGGGCTAGGCTGAGTGTAGCTGAGAGAT  
BrTT5-6 (594) A-----  
BoTT5-1 (590) AATCGATCATAGGAAGAAGGTTGTGTCTCCTGGGGCTAGGTTGAGTGTTCGCGAGAGAT  
BoTT5-2 (593) AGTTTATCATTGGAACGGAAGCTGCGTCTCCTAGGACTAGGTTGAGTGTTCGCGAGAGAT  
BoTT5-3 (590) AATCGATCATTGGAAGAACGGTGTGTCTCCTGGGGCTAGGTTGAGTGTTCGCGAGAGAT  
BoTT5-4 (692) AATCAATCATTGGAAGAACGGTGTGTCTCCTGGGGCTAGGCTGAGTGTAGCTGAGAGAT  
BjTT5 (590) AATCGATCATAGGAAGAAGGTTGTGTCTCCTGGGGCTAGGTTGAGTGTTCGCGAGAGAT

AtTT5 (659) TATCTCAGCTAATGATGAAGAACAAGGACGAAAAGGAAGTTAGTGATCACTCTGTTGAGG  
BnTT5 (474) -----  
BrTT5-1 (650) TAGCTCAGCTGATGAATAGTGACAAGATCGAAGAAGATGCAACAAAGACTGATCAAGAGG  
BrTT5-2 (650) TAGCTCAGCTGATGAATAGTGACAAGATCGAAGAAGATGCAACAAAGACTGATCAAGAGG  
BrTT5-3 (583) -----CTGATGAAGGAGAACAAGGTCGAAAAGATGCAACAAAGACTGATAATCAAG  
BrTT5-4 (650) TAGCTCAGCTGATGAATAGTGACAAGGTCGAAGAAGATGCAACAAAGACTGATCAAGAGG  
BrTT5-5 (737) TAGCTCAGCTGATGAAGCTTGAACGCCGGGCTGAGACATTAATATTGGCCGACAAAAA  
BrTT5-6 (595) -----

BoTT5-1 (650) TATCTCAGCTGATGAAGGAGAACAAGGTCGAAAAAGATGCAACAAAGACTGATAATCAAG  
 BoTT5-2 (653) TATCTCAGCTGATGAATAGTGACAAGGTCGAAGAAGATGCAACAAAGACATGA-----  
 BoTT5-3 (650) TAGCTCAGCTGATGAATAGTGACAAGGTCGAAGAAGATGCAACAAAGACTGATCAAGAGG  
 BoTT5-4 (752) TAGCTCAGGTGATGAAGAATGAAGGCCGGGCTGAGACATTAATATTGGGCGACAAAAAAT  
 BjtT5 (650) TATCTCACCTGATGAAGGAGAACAAGGTCAAAGAAGATGCAACAAAGACTGATAATCAAG  
  
 AtTT5 (719) A-----AAAAGTAGCCAAAGAGAACTGA-----  
 BnTT5 (474) -----  
 BrTT5-1 (710) A---AGCTAACGATCTCCCCCTCGGAGATCAACTGGCCAAAGAGAACTGA-----  
 BrTT5-2 (710) A---AGCTAACGATCTCCCCCTCGGAGATAAACTGGCCAAAGAGAACTGA-----  
 BrTT5-3 (635) ATG-AAGCTAACGATGTCTCCCTTGGAGATAAAGTTGGCCAAAGAGAACTGA-----  
 BrTT5-4 (710) A---AGCTAACGATCTCCCCCTCGGAGATAAACTGGCCAAAGAGAACTGA-----  
 BrTT5-5 (797) T-----TAT---GAAAAATAACGAGGTCAAAGAAGATGCAACAAAGACAAAGACTGAT  
 BrTT5-6 (595) -----  
 BoTT5-1 (710) ATG-AAGCTAACGATGTTTCCCTTGGAGATAAAGTTGGCCAAAGAGAACTGA-----  
 BoTT5-2 (706) -----  
 BoTT5-3 (710) A---AGCTAACAACTCTCCCCCTAGGAGATAAACTGGCCAAAGAGAACTGA-----  
 BoTT5-4 (812) TCGTAAGTTTTTTTTATATATATAGGCCCAAACGTGGGTAAAAAATATAAA-AGTTTT  
 BjtT5 (710) ATG-AAGCTAACGATCTCTCCCTTGGAGATAAAGTTGGCCAAAGAGAACTGATCGTGTGGG  
  
 AtTT5 (742) -----  
 BnTT5 (474) -----  
 BrTT5-1 (757) -----  
 BrTT5-2 (757) -----  
 BrTT5-3 (685) -----  
 BrTT5-4 (757) -----  
 BrTT5-5 (847) CAAGAGGAAGCTAACGATCTCTCCCTCGGAGATAAAATTTGGCTGAAGAAAAGCTGA-----  
 BrTT5-6 (595) -----  
 BoTT5-1 (760) -----  
 BoTT5-2 (706) -----  
 BoTT5-3 (757) -----  
 BoTT5-4 (871) TAA-----  
 BjtT5 (769) AGGTTTTTCTAGCTTGGTCTGCTCTTTGAGGGCTTTATGTTTCTATATCTAATCATGTTGTT  
  
 AtTT5 (742) -----  
 BnTT5 (474) -----  
 BrTT5-1 (757) -----  
 BrTT5-2 (757) -----  
 BrTT5-3 (685) -----  
 BrTT5-4 (757) -----  
 BrTT5-5 (901) -----  
 BrTT5-6 (595) -----  
 BoTT5-1 (760) -----  
 BoTT5-2 (706) -----  
 BoTT5-3 (757) -----  
 BoTT5-4 (874) -----  
 BjtT5 (829) TAGTTCACCTTTGAGGGCTTTATGTTTCTATATCTAATCATGTTGTTTAGTTTCACATCAGC  
  
 AtTT5 (742) -----  
 BnTT5 (474) -----  
 BrTT5-1 (757) -----  
 BrTT5-2 (757) -----  
 BrTT5-3 (685) -----  
 BrTT5-4 (757) -----  
 BrTT5-5 (901) -----  
 BrTT5-6 (595) -----  
 BoTT5-1 (760) -----  
 BoTT5-2 (706) -----  
 BoTT5-3 (757) -----  
 BoTT5-4 (874) -----  
 BjtT5 (889) TGTTTTTATTCCTTCTACCCAAAAAATAAAAAA

5. BnTT6

AtTT6-1 (1) -----ATGGCTCCAGGAACTTTGA  
 AtTT6-2 (1) -----  
 BnTT6-1 (1) ----G TTCATGCATTATTTTTACATTCTTGATAATTATAAATGGCTCCAGGAACTCTAA  
 BnTT6-2 (1) TTCTTGTTTCATGCATTCCTTTTACATTCTTGATAATTATAAATGGCTCCAGGAACTCTAA  
 BrTT6-2 (1) -----ATGGCTCCAGCAACTCTAA  
 BrTT6-1 (1) -----GATTGTAATTACA-ATGGCTCCAGGAACTCTAA  
 BoTT6-1 (1) -----ATGGCTCCAGCAACTCTAA  
 BoTT6-2 (1) -----ATGGCTCCAGGAACTCTAA

AtTT6-1 (20) CTGAGCTAGCCGGAGAGTCTAAGCTCAACTCTAAATTTGTCAGGGACGAGATGAACGGC  
 AtTT6-2 (1) -----  
 BnTT6-1 (56) CTGAGCTTGCCGGGAGAGACTAAGCTCAACTCTAAGTTCGTCCGGGACGAGGATGAACGTC  
 BnTT6-2 (61) ATGAGCTTGCCGGGAGAGACTAAGCTCAACTCCAAGTTTGTCCGGGACGAGGACGAACGTC  
 BrTT6-2 (20) CCGAGCTTGCCGGGAGAGTCTAAGCTCAACTCCAAGTTCGTCCGGGACGTGGACGAACGTC  
 BrTT6-1 (33) CTGAGCTTGCCGGGAGAGACTAAGCTCAACTCTAAGTTCGTCCGGGACGAGGATGAACGTC  
 BoTT6-1 (20) CTGAGCTTGCCGGGAGAGTCTAAGCTCAACTCCAAGTTCGTCCGGGACGAGGACGAACGTC  
 BoTT6-2 (20) CTGAGCTTGCCGGGAGAGACTAAGCTCAACTCTAAGTTTGTCCGGGACGAGGACGAACGTC

AtTT6-1 (80) CCAAAGTCGTTACAATGTGTTTAGCGACGAAATCCCGTGATCTCTCTCGCCGGTATCG  
 AtTT6-2 (1) -----  
 BnTT6-1 (116) CCAAGTTGCTTACAATGAGTTTAGCAGGAGATCCCGTGATCTCTCTCGCCGGAAATCG  
 BnTT6-2 (121) CCAAGTTGCTTACAATGAGTTTAGCAGGAGATCCCGTGATCTCTCTCGCCGGAAATCG  
 BrTT6-2 (80) CCAAGTTGCTTACAATGAGTTTAGCAGGAGATCCCGTGATCTCTCTCGCAGGAAATCG  
 BrTT6-1 (93) CCAAGTTGCTTACAATGAGTTTAGCAGGAGATCCCGTGATCTCTCTCGCCGGAAATCG  
 BoTT6-1 (80) CCAAGTTGCTTACAATGAGTTTAGCAGGAGATCCCGTGATCTCTCTCGCCGGAAATCG  
 BoTT6-2 (80) CCAAGTTGCTTACAATGAGTTTAGCAGGAGATCCCGTGATCTCTCTCGCCGGAAATCG

AtTT6-1 (140) ATGACGTCGATGGAAAAAGAGGAGAGATCTGCCGTCAGATCGTTGAGGCTTGTGAGAATT  
 AtTT6-2 (1) -----  
 BnTT6-1 (176) ACGATGTTGGTGGGAAAAGAGGAGAGATCTGTGACAGATCGTTGAGGCTTGTGAGAATT  
 BnTT6-2 (181) ACGATGTTGGTGGGAAAAGAGGAGAGATCTGTGACAGATCGTTGAGGCTTGTGAGAATT  
 BrTT6-2 (140) ATCATGTTGGTGGGAAAAGAGGAGACATATGTCGTCAGATCGTTGAGGCTTGTGAGAATT  
 BrTT6-1 (153) ACGATGTTGGTGGGAAAAGAGGAGAGATCTGTGACAGATCGTTGAGGCTTGTGAGAATT  
 BoTT6-1 (140) ACCATGTTGGTGGGAAAAGAGGAGATATATGTCGTCAGATCGTTGAGGCTTGTGAGAATT  
 BoTT6-2 (140) ACGATGTTGGTGGGAAAAGAGGAGAGATCTGTGACAGATCGTTGAGGCTTGTGAGAATT

AtTT6-1 (200) GGGGCATCTTCCAAGTGGTCGATCACGGCGTCGATACTAACTTAGTGGCGGATATGACTC  
 AtTT6-2 (1) -----ATGACTC  
 BnTT6-1 (236) GGGGTGTTTTTTCAGGTGGTCGATCATGGGTGGATACTAGTTTGGTGGCCGATATGACTC  
 BnTT6-2 (241) GGGGTGTTTTTTCAGGTGGTCGATCATGGAGTGGATACTAGTTTGGTGGCCGATATGACTC  
 BrTT6-2 (200) GGGGAGTTTTTTCAGGTGGTCGATCATGGGTGGATACTAGTTTGGTGGCCGATATGACTC  
 BrTT6-1 (213) GGGGTGTTTTTTCAGGTGGTCGATCATGGGTGGATACTAGTTTGGTGGCCGATATGACTC  
 BoTT6-1 (200) GGGGAGTTTTTTCAGGTGGTCGATCATGGGTGGATACTAGTTTGGTGGCTGATATGACTC  
 BoTT6-2 (200) GGGGTGTTTTTTCAGGTGGTCGATCATGGAATGGATACTAGTTTGGTGGCCGATATGACTC

AtTT6-1 (260) GTCTCGCTCGTGACTTCTTTGCTTTACCTCCGGAAGACAAGCTCCGTTTCGACATGTCCG  
 AtTT6-2 (8) GTCTCGCTCGTGACTTCTTTGCTTTACCTCCGGAAGACAAGCTCCGTTTCGACATGTCCG  
 BnTT6-1 (296) GTCTCGCTCGAGACTTCTTCGCCTTACCTCCTGAGGAGAAACTCAAGTTCGACATGTCTG  
 BnTT6-2 (301) GTCTCGCTCGAGACTTCTTCGCCTTACCTCCTGAGGAGAAACTCAAGTTCGACATGTCTG  
 BrTT6-2 (260) GTCTCGCTAGCGACTTCTTCTTTACCACCTGAGGATAAACTCAAGTTCGATATGTCCG  
 BrTT6-1 (273) GTCTCGCTCGAGACTTCTTCGCCTTACCTCCTGAGGAGAAACTCAAGTTCGACATGTCTG  
 BoTT6-1 (260) GTCTCGCTAGCGACTTCTTCTTTGCCACCTGAGGATAAAATTAAGTTCGACATGTCCG  
 BoTT6-2 (260) GTCTCGCTCGAGACTTCTTCGCCTTACCTCCTGAGGAGAAACTCAAGTTCGACATGTCTG

AtTT6-1 (320) GTGGTAAAAAAGGAGGATTTCATCGTCTCTAGTCACTCCAGGGAGAGGCTGTGCAAGATT  
 AtTT6-2 (68) GTGGTAAAAAAGGAGGATTTCATCGTCTCTAGTCACTCCAGGGAGAGGCTGTGCAAGATT  
 BnTT6-1 (356) GTGGTAAAAAAGGAGGATTTCATGTCCTCTAGTCACTTCCAGGGAGAGTCTGTTCAAGACT  
 BnTT6-2 (361) GTGGTAAAAAAGGAGGATTTCATGTCCTCTAGTCACTTCCAGGGAGAGTCTGTTCAAGACT  
 BrTT6-2 (320) GTGGTAAAAAAGGAGGATTTCATCGTCTCAAGTCACTTCCAGGGAGAGGTTGTTCAAGATT  
 BrTT6-1 (333) GTGGTAAAAAAGGAGGATTTCATGTCCTCTAGTCACTTCCAGGGAGAGTCTGTTCAAGACT  
 BoTT6-1 (320) GTGGTAAAAAAGGAGGATTTCATCGTCTCAAGTCACTTCCAGGGAGAGGTTGTTCAAGATT  
 BoTT6-2 (320) GTGGTAAAAAAGGAGGATTTCATGTCCTCTAGTCACTTCCAGGGAGAGTCTGTTCAAGATT

AtTT6-1 (380) GGAGAGAGATTGTAACGTATTTCTCGTACCCGGTGAGAAACAGAGACTACTCACGGTGGC  
 AtTT6-2 (128) GGAGAGAGATTGTAACGTATTTCTCGTACCCGGTGAGAAACAGAGACTACTCACGGTGGC  
 BnTT6-1 (416) GGAGAGAGATCGTGACGTATTTCTCGTACCCGGTGAGAAACAGAGACTACTCACGGTGGC  
 BnTT6-2 (421) GGAGAGAGATCGTGACGTATTTCTCGTACCCGGTGAGAAACAGAGACTACTCACGGTGGC  
 BrTT6-2 (380) GGAGAGAGATCGTGACGTATTTCTCGTACCCGGTGAGAAACAGAGACTACTCACGGTGGC  
 BrTT6-1 (393) GGAGAGAGATCGTGACGTATTTCTCGTACCCGGTGAGAAACAGAGACTACTCACGGTGGC  
 BoTT6-1 (380) GGAGAGAGATCGTGACGTATTTCTCGTACCCGGTGAGAAACAGAGACTACTCACGGTGGC  
 BoTT6-2 (380) GGAGAGAGATCGTGACGTATTTCTCGTACCCGGTGAGAAACAGAGACTACTCACGGTGGC

AtTT6-1 (440) CAGATAAGCCGGAAGGTTGGGTGAAAGTGACGGAGGAGTATAGTGAGAGGCTTATGAGTT  
 AtTT6-2 (188) CAGATAAGCCGGAAGGTTGGGTGAAAGTGACGGAGGAGTATAGTGAGAGGCTTATGAGTT  
 BnTT6-1 (476) CGACTAAGCCGGAAGGATGGGTGAAAGTGACGGAGGAGTACAGCGAGAGGCTGATGGGTT  
 BnTT6-2 (481) CGACTAAGCCGGAAGGATGGGTGAAAGTGACGGAGGAGTACAGCGAGAGGCTGATGGGTT  
 BrTT6-2 (440) CGAATAAGCCGGAAGGTTGGGTGAAAGTGACGGAGGAGTACAGCGAGAAGCTCATCGAGT  
 BrTT6-1 (453) CGACTAAGCCGGAAGGATGGGTGAAAGTGACGGAGGAGTACAGCGAGAGGCTGATGGGTT  
 BoTT6-1 (440) CGGGTAAGCCGGAAGGTTGGGTGAAAGTGACTGAGGAGTACAGCGAGAAGCTGATGGAGT  
 BoTT6-2 (440) CGACTAAGCCGGAAGGATGGGTGAAAGTGACGGAGGAGTACAGCGAGAGGCTGATGGGTT

AtTT6-1 (500) TGGCTTGTAAGCTTCTTGAGGTTTTGTCTGAAGCTATGGGCTTTGAGAAAGAGTCTCTTA  
 AtTT6-2 (248) TGGCTTGTAAGCTTCTTGAGGTTTTGTCTGAAGCTATGGGCTTTGAGAAAGAGTCTCTTA  
 BnTT6-1 (536) TGGCTTGTAAGCTTCTTGAGGTTTTGTCTGAAGCTATGGGGCTTTGAGAAAGAGGCACTTA  
 BnTT6-2 (541) TGGCTTGTAAGCTTCTTGAGGTTTTGTCTGAAGCTATGGGGCTTCGAGAAAGAGGCACTCA  
 BrTT6-2 (500) TGGCTTGTAAGCTTCTTGAGATTTTGTCTGAAGCTATGGGACTTTGAGAAAGAAGCCCTTA  
 BrTT6-1 (513) TGGCTTGTAAGCTTCTTGAGGTTTTGTCTGAAGCCATGGGGCTTCGAGAAAGAGGCACTCA  
 BoTT6-1 (500) TGGCTTGTAAGCTTCTTGAGATTTTGTCTGAAGCTATGGGGACTTGAGAAAGAAGCACTTA  
 BoTT6-2 (500) TGGCTTGTAAGCTTCTTGAGGTTTTGTCTGAAGCTATGGGGCTTCGAGAAAGAGGCACTCA

AtTT6-1 (560) CCAATGCATGCGTCGATATGGACCAAAGATTGTTGTTAATTATTACCCAAAATGCCCTC  
 AtTT6-2 (308) CCAATGCATGCGTCGATATGGACCAAAGATTGTTGTTAATTATTACCCAAAATGCCCTC  
 BnTT6-1 (596) CCAATGCATGCGTCGATATGGACCAAAGATTGTTGTTAACTATTACCCAAAATGCCCTC  
 BnTT6-2 (601) CCAATGCATGCGTCGATATGGACCAAAGATTGTTGTTAACTATTACCCAAAATGCCCTC  
 BrTT6-2 (560) CCAATGCATGCGTCGATATGGACCAAAGATTGTTGTTAACTATTACCCAAAATGCCCTC  
 BrTT6-1 (573) CCAATGCATGCGTCGATATGGACCAAAGATTGTTGTTAACTATTACCCAAAATGCCCTC  
 BoTT6-1 (560) CTAATGCATGCGTCGATATGGACCAAAGATTGTTGTTAACTATTACCCAAAATGCCCTC  
 BoTT6-2 (560) CCAATGCATGCGTCGATATGGACCAAAGATTGTTGTTAACTATTACCCAAAATGCCCTC

AtTT6-1 (620) AGCCTGATCTCACCTCGGACTCAAGCGTCACACTGACCCTGGAACCATTACCTTGCTGC  
 AtTT6-2 (368) AGCCTGATCTCACCTCGGACTCAAGCGTCACACTGACCCTGGAACCATTACCTTGCTGC  
 BnTT6-1 (656) AGCCTGATCTAACCCTCGGACTCAAGCGTCACACTGACCCTGGAACCATTACCTTGCTGC  
 BnTT6-2 (661) AGCCTGATCTAACCCTCGGGCTCAAGCGTCACACTGACCCTGGAACCATTACCTTGCTGC  
 BrTT6-2 (620) AGCCTGATCTCACACTCGGACTCAAGCGTCACACTGACCCTGGAACCATTACCTTGCTGC  
 BrTT6-1 (633) AGCCTGATCTTACCCTCGGACTCAAGCGTCACACTGACCCTGGAACCATTACCTTGCTGC  
 BoTT6-1 (620) AGCCTGATCTCACACTCGGACTCAAGCGTCACACTGACCCTGGAACCATTACCTTGCTGC  
 BoTT6-2 (620) AGCCTGATCTAACCCTCGGGCTCAAGCGTCACACTGACCCTGGAACCATTACCTTGCTGC

AtTT6-1 (680) TACAAGACCAAGTCGGTGGATTACAAGCCACACGTGACAATGGCAAGACATGGATTACGG  
 AtTT6-2 (428) TACAAGACCAAGTCGGTGGATTACAAGCCACACGTGACAATGGCAAGACATGGATTACGG  
 BnTT6-1 (716) TCCAAGACCAAGTCGGTGGTTTACAAGCCACACGATGGCAAGACATGGATTACGG  
 BnTT6-2 (721) TCCAAGACCAAGTGGTGGTTTACAAGCCACACGATGGCAAGACATGGATTACAG  
 BrTT6-2 (680) TCCAAGACCAAGTCGGTGGTTTACAAGCCACACGATGGGAGACATGGATTACGG  
 BrTT6-1 (693) TCCAAGACCAAGTCGGTGGTTTACAAGCCACACGATGGGAGACATGGATTACGG  
 BoTT6-1 (680) TCCAAGACCAAGTCGGTGGTTTACAAGCCACCCGAGACATGGGAGACATGGATTACGG  
 BoTT6-2 (680) TCCAAGACCAAGTGGTGGTTTACAAGCCACACGAGACGGTGGGAGACATGGATTACAG

AtTT6-1 (740) TTCAGCCTGTTGAAGGAGCGTTTGTGCTCAATCTCGGCGACCACGGCCATTTTTTGAGCA  
 AtTT6-2 (488) TTCAGCCTGTTGAAGGAGCGTTTGTGCTCAATCTCGGCGACCACGGCCATTTTTTGAGCA  
 BnTT6-1 (776) TTCAGCCTGTTGAAGGAGCTTTTGTGTTAATCTTGGCGACCATGGTCACTATCTGAGCA  
 BnTT6-2 (781) TTCAGCCTGTTGAAGGAGCTTTTGTGTTAATCTTGGCGACCATGGTCACTATCTGAGCA  
 BrTT6-2 (740) TTCAGCCTGTTGAAGGAGCTTTTGTGCTCAATCTTGGCGACCATGGTCACTATCTGAGCA  
 BrTT6-1 (753) TTCAGCCTGTTGAAGGAGCTTTTGTGCTCAATCTTGGCGACCATGGTCACTATCTGAGCA  
 BoTT6-1 (740) TTCAGCCTGTTGAAGGAGCTTTTGTGCTCAATCTTGGCGACCATGGTCACTATCTGAGCA  
 BoTT6-2 (740) TTCAGCCTGTTGAAGGAGCTTTTGTGTTAATCTTGGCGACCATGGTCACTATCTGAGCA



AtTT6-1 (800) ATGGGAGGTTCAAGAAATGCTGATCATCAGGCCGTGGTGAACCTCTAACTCGAGCAGATTAT  
 AtTT6-2 (548) ATGGGAGGTTCAAGAAATGCTGATCATCAGGCCGTGGTGAACCTCTAACTCGAGCAGATTAT  
 BnTT6-1 (836) ACGGGAGGTTCAAGAACGCTGACCACCAGGCCGTGGTGAACCTCAACTCGAGCAGACTAT  
 BnTT6-2 (841) ACGGGAGGTTCAAGAACGCTGACCACCAGGCCGTGGTGAACCTCAACTCGAGCAGACTAT  
 BrTT6-2 (800) ACGGGAGGTTCAAGAACGCTGACCACCAGGCCGTGGTGAACCTCAACTCGAGCAGATTAT  
 BrTT6-1 (813) ACGGGAGGTTCAAGAACGCTGACCACCAGGCCGTGGTGAACCTCAACTCGAGCAGACTAT  
 BoTT6-1 (800) ACGGGAGGTTCAAGAACGCTGACCACCAGGCCGTGGTGAACCTCAACTCGAGCAGATTTT  
 BoTT6-2 (800) ACGGGAGGTTCAAGAACGCTGACCACCAGGCCGTGGTGAACCTCAACTCGAGCAGACTAT  
  
 AtTT6-1 (860) CCATAGCCACGTTCCAGAACCCCGGCCGGATGCCACAGTGTATCCACTGAAAGTAAAGAG  
 AtTT6-2 (608) CCATAGCCACGTTCCAGAACCCCGGCCGGATGCCACAGTGTATCCACTGAAAGTAAAGAG  
 BnTT6-1 (896) CAATAGCCACGTTCCAGAATCCCGGCCCGGAAGCAACTGTGTATCCGCTTAAAGTGAGAG  
 BnTT6-2 (901) CAATAGCCACGTTCCAGAATCCCGGCCCGGAAGCAACCGTGTATCCGCTTAAAGTGAGAG  
 BrTT6-2 (860) CCATAGCCACGTTCCAGAATCCAGCGCCGAAGCAACCGTGTATCCGCTTAAAGTAAAG  
 BrTT6-1 (873) CAATAGCCACGTTCCAGAATCCCGGCCCGGAAGCAACCGTGTATCCGCTTAAAGTGAGAG  
 BoTT6-1 (860) CTATAGCCACGTTCCAGAATCCGGCTCCGGAAGCAACCGTGTATCCGCTTAAAGTAAAG  
 BoTT6-2 (860) CAATAGCCACGTTCCAGAATCCCGGCCCGGAAGCAACCGTGTATCCGCTTAAAGTGAGAG  
  
 AtTT6-1 (920) AAGGAGAGAAGGCAATATTGGAGGAGCCAATCAGCTTTGCCGAGATGTATAAGAGAAAAGA  
 AtTT6-2 (668) AAGGAGAGAAGGCAATATTGGAGGAGCCAATCAGCTTTGCCGAGATGTATAAGAGAAAAGA  
 BnTT6-1 (956) AAGGAGAGAAGCCGATCTTGGAGGAGCCAATTACGTTTGCAGGATGTATAGGAGAAAAGA  
 BnTT6-2 (961) AAGGAGAGAAGCCGATCTTGGAGGAGCCAATTACGTTTGCAGGATGTATAAGAGAAAAGA  
 BrTT6-2 (920) AAGGAGAGAAGCCGATCTTGGAGGAGCCGATTGCGTTTGCAGGATGTATAAGATAAAGA  
 BrTT6-1 (933) AAGGAGAGAAGCCGATCTTGGAGGAGCCAATTACGTTTGCAGGATGTATAGGAGAAAAGA  
 BoTT6-1 (920) AAGGAGAGAAGCCAATCTTGGAGGAGCCGATTGCGTTTGCAGGATGTACAAGAGAAAAGA  
 BoTT6-2 (920) AAGGAGAGAAGCCGATCTTGGAGGAGCCAATTACGTTTGCAGGATGTATAAGAGAAAAGA  
  
 AtTT6-1 (980) TGGGAAGAGATTTGGAGCTTGCTCGCCTCAAGAAGCTGGCTAAAGAGGAGCGTGACCACA  
 AtTT6-2 (728) TGGGAAGAGATTTGGAGCTTGCTCGCCTCAAGAAGCTGGCTAAAGAGGAGCGTGACCACA  
 BnTT6-1 (1016) TGAGTAGAGATATCGAGCTGGCTCGCCTCAAGAAGCTGGCGAAAGAAGACATGACCACA  
 BnTT6-2 (1021) TGAGTAGAGATCTCGAGCTGGCTCGCCTCAAGAAGCTGGCGAAAGAAGACATGACCACA  
 BrTT6-2 (980) TGGGTCGAGATCTCGAGCTGGCTCGCCTCAAGAAGCTGGCTAAAGAA-AA-----ACA  
 BrTT6-1 (993) TGAGTAGAGATATCGAGCTGGCTCGCCTCAAGAAGCTGGCGAAAGAAGACATGACCACA  
 BoTT6-1 (980) TGGGTCGAGATCTCGAGCTGGCTCGCCTCAAGAAGCTGACTAAAGAG-AA-----ACA  
 BoTT6-2 (980) TGAGTAGAGATCTCGAGCTGGCTCGCCTCAAGAAGCTGGCGAAAGAAGAGCATGACCACA  
  
 AtTT6-1 (1040) AAGAAGTTGACAAGCCTGTGACCAAATCTTCGCTTAG-----  
 AtTT6-2 (788) AAGAAGTTGACAAGCCTGTGACCAAATCTTCGCTTAG-----  
 BnTT6-1 (1076) AGGAAGCTGCCAAGCCTCTAGACCAAATCATCGCTTAGACTCCTTGTGTTGGCCCTTAC  
 BnTT6-2 (1081) AGGAAGCTGCCAAGCCTCTAGACCAAATCATCGCTTAGACTCCTTGTGTTGGCCCTTAC  
 BrTT6-2 (1032) AGGAGCTGCGGAGCCTCTTGA-----  
 BrTT6-1 (1053) AGGAAGCTGCCAAGCCTCTAGACCAAATCATCGCTTAGACTCCTTGTGTTGGCCCTTAC  
 BoTT6-1 (1032) AGGAGCTGCGAAGCCTCTTGA-----  
 BoTT6-2 (1040) AGGAAGCTGCCAAGCCTCTAGACCAAATCATCGCTTAG-----  
  
 AtTT6-1 (1078) -----  
 AtTT6-2 (826) -----  
 BnTT6-1 (1136) TATTGTGTTGGTTTCGTTGTGTAAAGTCGGTACTGAAATTAAGTTATGTCATGTTGGGTGA  
 BnTT6-2 (1141) TATTGTGTTGGTTTCGTTGTGTAAAGTCGGTACTGAAATTAAGTTATGTCATGTTGGGTGA  
 BrTT6-2 (1054) -----  
 BrTT6-1 (1113) TATTGTGTTGGTTTCGTTGTGTAAAGTCGGTACTGAAATTAAGTTATGTCATGT-GGGTGA  
 BoTT6-1 (1054) -----  
 BoTT6-2 (1078) -----  
  

1201 1236

 AtTT6-1 (1078) -----  
 AtTT6-2 (826) -----  
 BnTT6-1 (1196) AAAAAAAAAAAAAAAAAAAAAA-----  
 BnTT6-2 (1201) ATTTGAGTTTTAAAAAAAAAAAAAAAAAAAAAAAAA  
 BrTT6-2 (1054) -----  
 BrTT6-1 (1172) ATTAATC-----  
 BoTT6-1 (1054) -----  
 BoTT6-2 (1078) -----

## 6. BnTT7

|         |       |                                                                |
|---------|-------|----------------------------------------------------------------|
| AtTT7   | (1)   | -----ATGGCAACTCTATTTCTCACAATCCTCCTAGCCA                        |
| BnTT7   | (1)   | CTCACTTACCATTCAAACCCACCCTATGACTAATCTTTACCTCACAATCCTTCTCCCTA    |
| BrTT7-1 | (1)   | -----ATGACTAATCTTTACCTCACAATCCTTCTCCCTA                        |
| BrTT7-2 | (1)   | -----ATGACTAATCTTTACCTCACAATCCTTCTCCCTA                        |
| BrTT7-3 | (1)   | -----ATGACTAATCTTTACCTCACAATCCTTCTCCCTA                        |
| BoTT7   | (1)   | -----ATGACTAATCTTTACCTCACAATCCTTCTCCCTA                        |
| AtTT7   | (35)  | CTGTCTCTTCCTCATCCTCCGTATCTTCTCTCACCGTCGCAACCGCAGCCACAACAACC    |
| BnTT7   | (61)  | CTTTCATATTCCTTATCGTTCTCGTCTTATCTCGCCGCCGCAAT-----AACC          |
| BrTT7-1 | (35)  | CTTTCATATTCCTTATCGTTCTCGTCTTATCTCGCCGCCGCAAT-----AACC          |
| BrTT7-2 | (35)  | CTTTCATATTCCTTATCGTTCTTGTCTTATCTCGCCGCCGCAAT-----AACC          |
| BrTT7-3 | (35)  | CTTTCATATTCCTTATCGTTCTTGTCTTATCTCGCCGCCGCAAT-----AACC          |
| BoTT7   | (35)  | CTTTCATATTCCTTATCGTTCTCGTCTTATCTCGCCGCCGCAAC-----AACC          |
| AtTT7   | (95)  | GTCTTCCACCGGGGCCAAACCCATGGCCCATCATCGGAAACCTCCCTCACATGGGCACTA   |
| BnTT7   | (109) | GTCTCCCTCCAGGTCAAACCCATGGCCCATCATCGGAAACCTCCCTCACATGGGCCTA     |
| BrTT7-1 | (83)  | GTCTCCCTCCAGGTCAAACCCATGGCCCATCATCGGAAACCTCCCTCACATGGGCCTA     |
| BrTT7-2 | (83)  | GTCTCCCTCCAGGTCAAACCCATGGCCCATCATCGGAAACCTCCCTCACATGGGCCTA     |
| BrTT7-3 | (83)  | GTCTCCCTCCAGGTCAAACCCATGGCCCATCATCGGAAACCTCCCTCACATGGGCCTA     |
| BoTT7   | (83)  | GTCTCCCTCCAGGTCAAACCCATGGCCCATCATCGGAAACCTCCCTCACATGGGCCTA     |
| AtTT7   | (155) | AGCCTCATCGAACCTTTCCGCCATGGTTACTACTTACGGCCCTATCCTCCACCTCCGAC    |
| BnTT7   | (169) | AACCCCATCAAACACTAGCCGCCATGGTAACCACATACGGACCTATCCTCCACCTACGGC   |
| BrTT7-1 | (143) | AACCCCATCAAACACTAGCCGCCATGGTAACCACATACGGACCTATCCTCCACCTACGGC   |
| BrTT7-2 | (143) | AACCCCATCAAACACTAGCCGCCATGGTAACCACATACGGACCTATCCTCCACCTACGGC   |
| BrTT7-3 | (143) | AACCCCATCAAACACTAGCCGCCATGGTAACCACATACGGACCTATCCTCCACCTACGGC   |
| BoTT7   | (143) | AACCCCATCAAACACTAGCCGCCATGGTAACCACATACGGACCTATCCTCCACCTACGGC   |
| AtTT7   | (215) | TAGGGTTCGTAGACGTCGTGGTTCGCCCTTCTAAATCCGTGGCCGACAGTTCTTGAAAA    |
| BnTT7   | (229) | TAGGGTTCGCCGACGTTGTGGTTGCCGCTCTAAATCCGTGGCCGAAACAGTTCTTGAAAG   |
| BrTT7-1 | (203) | TAGGGTTCGCCGACGTTGTGGTTGCCGCTCTAAATCCGTGGCCGAAACAGTTCTTGAAAG   |
| BrTT7-2 | (203) | TAGGGTTCGCCGACGTTGTGGTTGCCGCTCTAAATCCGTGGCCGAAACAGTTCTTGAAAG   |
| BrTT7-3 | (203) | TAGGGTTCGCCGACGTTGTGGTTGCCGCTCTAAATCCGTGGCCGAAACAGTTCTTGAAAG   |
| BoTT7   | (203) | TAGGGTTCGCCGACGTTGTGGTTGCCGCTCTAAATCCGTGGCCGAAACAGTTCTTGAAAG   |
| AtTT7   | (275) | TACACGACGCCAATTTTCGCTAGCCGACCACCAAACCTCAGGAGCTAAACACATGGCATATA |
| BnTT7   | (289) | TTCATGATGCCAATTTTCGCTAGCCGACCACCTAACTCCGGAGCCAAACACATGGCGTATA  |
| BrTT7-1 | (263) | TTCATGATGCCAATTTTCGCTAGCCGACCACCTAACTCCGGAGCCAAACACATGGCATATA  |
| BrTT7-2 | (263) | TTCATGATGCCAATTTTCGCTAGCCGACCACCTAACTCCGGAGCCAAACACATGGCATATA  |
| BrTT7-3 | (263) | TTCATGATGCCAATTTTCGCTAGCCGACCACCTAACTCCGGAGCCAAACACATGGCATATA  |
| BoTT7   | (263) | TTCATGATGCCAATTTTCGCTAGCCGACCACCTAACTCCGGAGCCAAACACATGGCATATA  |
| AtTT7   | (335) | ACTATCAAGATCTTGTCTTTGCGCCTTATGGACAACGATGGAGAAATGTTGAGGAAGATTA  |
| BnTT7   | (349) | ACTATCAAGATCTTGTCTTTGCGCCTTATGGACAACGATGGAGAAATGTTGAGGAAGATTA  |
| BrTT7-1 | (323) | ACTATCAAGATCTTGTCTTTGCGCCTTATGGACAACGATGGAGAAATGTTGAGGAAGATTA  |
| BrTT7-2 | (323) | ACTATCAAGATCTTGTCTTTGCGCCTTATGGACAACGATGGAGAAATGTTGAGGAAGATTA  |
| BrTT7-3 | (323) | ACTATCAAGATCTTGTCTTTGCGCCTTATGGACAACGATGGAGAAATGTTGAGGAAGATTA  |
| BoTT7   | (323) | ACTATCAAGATCTTGTCTTTGCGCCTTATGGACAACGATGGAGAAATGTTGAGGAAGATTA  |
| AtTT7   | (395) | GTTCTGTTTCATCTATTTTCAGCTAAAGCTCTCGAAGATTTCAAACATGTTTCGACAGGAAG |
| BnTT7   | (409) | GTTCTGTTTCATTTATTTTCAGCTAAAGCTCTTGAAGATTTCAAACATGTTTCGACAGGAAG |
| BrTT7-1 | (383) | GTTCTGTTTCATTTATTTTCAGCTAAAGCTCTTGAAGATTTCAAACATGTTTCGACAGGAAG |
| BrTT7-2 | (383) | GTTCTGTTTCATTTATTTTCAGCTAAAGCTCTTGAAGATTTCAAACATGTTTCGACAGGAAG |
| BrTT7-3 | (383) | GTTCTGTTTCATTTATTTTCAGCTAAAGCTCTTGAAGATTTCAAACATGTTTCGACAGGAAG |
| BoTT7   | (383) | GTTCTGTTTCATTTATTTTCAGCTAAAGCTCTTGAAGATTTCAAACATGTTTCGACAGGAAG |
| AtTT7   | (455) | AGGTTGGAACGCTAACCGGGAGCTAGTGCCTGTTGGCACGAAACCCGTGAATTTAGGCC    |
| BnTT7   | (469) | AGGTTGGAACACTCATGCGCGAGCTAGCGCGTGCAAACACGAAACCCAGTGAACCTTAGGCC |
| BrTT7-1 | (443) | AGGTTGGAACACTCGTGC CGAGCTAGCGCGTGCAAACACGAAACCCAGTGAACCTTAGGCC |
| BrTT7-2 | (443) | AGGTTGGAACACTCATGCGCGAGCTAGCGCGTGCAAACACGAAACCCAGTGAACCTTAGGCC |
| BrTT7-3 | (443) | AGGTTGGAACACTCATGCGCGAGCTAGCGCGTGCAAACACGAAACCCAGTGAACCTTAGGCC |

BoTT7 (443) **AGGTTGGAACACTCATGCGCGAGCTAGCGCGTGCAAACACGAAACCAGTGAACCTAGGCC**  
 AtTT7 (515) **AGTTGGTGAACATGTGTGTAGTCAACGCTCTAGGACGAGAGATGATCGGACGGCGATTGT**  
 BnTT7 (529) **AGTTGGTAAACATGTGCGTACTCAACGCCCTTGGACGAGAGATGATCGGACGGCGACTGT**  
 BrTT7-1 (503) **AGTTGGTAAACATGTGCGTACTCAACGCCCTTGGACGAGAGATGATCGGACGGCGACTGT**  
 BrTT7-2 (503) **AGTTGGTAAACATGTGCGTACTCAACGCCCTTGGACGAGAGATGATCGGACGGCGACTGT**  
 BrTT7-3 (503) **AGTTGGTAAACATGTGCGTACTCAACGCCCTTGGACGAGAGATGATCGGACGGCGACTGT**  
 BoTT7 (503) **AGTTGGTAAACATGTGCGTACTCAACGCCCTTGGACGAGAGATGATCGGACGGCGACTGT**  
  
 AtTT7 (575) **TCGGCGCCGACGCCGATCATAAAGCTGACGAGTTTCGATCAATGGTGACGGAAATGATGG**  
 BnTT7 (589) **TCGGCGCCGATGCCGATCACAAGCGGAGGAGTTTCGATCAATGGTTACAGAAATGATGG**  
 BrTT7-1 (563) **TCGGCGCCGATGCCGATCACAAGCGGAGGAGTTTCGATCAATGGTTACAGAAATGATGG**  
 BrTT7-2 (563) **TCGGCGCCGATGCCGATCACAAGCGGAGGAGTTTCGATCAATGGTTACAGAAATGATGG**  
 BrTT7-3 (563) **TCGGCGCCGATGCCGATCACAAGCGGAGGAGTTTCGATCAATGGTTACAGAAATGATGG**  
 BoTT7 (563) **TCGGCGCCGATGCCGATCACAAGCGGAGGAGTTTCGATCAATGGTTACAGAAATGATGG**  
  
 AtTT7 (635) **CTCTCGCCGGAGTATTCAACATCGGAGACTTTCGTGCCGTCACCTTGATTGGTTAGATTTAC**  
 BnTT7 (649) **CTCTCGCCGGAGTATTCAACATCGGAGACTTTCGTGCCGTCACCTTGATTGTTTAGATTTAC**  
 BrTT7-1 (623) **CTCTCGCCGGAGTATTCAACATCGGAGACTTTCGTGCCGTCACCTTGATTGTTTAGATTTAC**  
 BrTT7-2 (623) **CTCTCGCCGGAGTATTCAACATCGGAGACTTTCGTGCCGTCACCTTGATTGTTTAGATTTAC**  
 BrTT7-3 (623) **CTCTCGCCGGAGTATTCAACATCGGAGACTTTCGTGCCGTCACCTTGATTGTTTAGATTTAC**  
 BoTT7 (623) **CTCTCGCCGGAGTATTCAACATCGGAGACTTTCGTGCCGTCACCTTGATTGTTTAGATTTAC**  
  
 AtTT7 (695) **AAGGCGTCGCTGGTAAAATGAAACGGCTTACACAAGAGATTTCGACGCTTTTCTATCGTCCA**  
 BnTT7 (709) **AAGGCGTCGCTGGTAAAATGAAACGGCTTACACAAGAGATTTCGACGCTTTTCTATCGTCCA**  
 BrTT7-1 (683) **AAGGCGTCGCTGGTAAAATGAAACGGCTTACACAAGAGATTTCGACGCTTTTCTATCGTCCA**  
 BrTT7-2 (683) **AAGGCGTCGCTGGTAAAATGAAACGGCTTACACAAGAGATTTCGACGCTTTTCTATCGTCCA**  
 BrTT7-3 (683) **AAGGCGTCGCTGGTAAAATGAAACGGCTTACACAAGAGATTTCGACGCTTTTCTATCGTCCA**  
 BoTT7 (683) **AAGGCGTCGCTGGTAAAATGAAACGGCTTACACAAGAGATTTCGACGCTTTTCTATCGTCCA**  
  
 AtTT7 (755) **TTTTGAAAGAGCACGA-A--ATGA---ACGGTCAAGATCAAAGCATAACAGATATGCTTA**  
 BnTT7 (769) **TCTTGAAGAACACGAGGCGATGAAGAACGGCCAGGATCAAAGCACACGGACATGCTTA**  
 BrTT7-1 (743) **TCTTGAAGAACACGAGGCGATGAAGAACGGCCAGGATCAAAGCACACGGACATGCTTA**  
 BrTT7-2 (743) **TCTTGAAGAACACGAGGCGATGAAGAACGGCCAGGATCAAAGCACACGGACATGCTTA**  
 BrTT7-3 (743) **TCTTGAAGAACACGAGGCGATGAAGAACGGCCAGGATCAAAGCACACGGACATGCTTA**  
 BoTT7 (743) **TCTTGAAGAGACGAGACGATGAAGAACGGCCAGGATCAAAGCACACGGACATGCTTA**  
  
 AtTT7 (809) **GCACCTTAATCTCCCTTAAAGGAAGTATCTTGACGGTGACGGAGGAACTTAACGGATA**  
 BnTT7 (829) **GCACCTTAATCTCCCTTAAAGGAAGTATCTTGATGGTGAGGGTGGAACTCTAAGTATA**  
 BrTT7-1 (803) **GCACCTTAATCTCCCTTAAAGGAAGTATCTTGATGGTGAGGGTGGAACTCTAAGTATA**  
 BrTT7-2 (803) **GCACCTTAATCTCCCTTAAAGGAAGTATCTTGATGGTGAGGGTGGAACTCTAAGTATA**  
 BrTT7-3 (803) **GCACCTTAATCTCCCTTAAAGGAAGTATCTTGATGGTGAGGGTGGAACTCTAAGTATA**  
 BoTT7 (803) **GCACCTTAATCTCCCTTAAAGGAAGTATCTTGATGGTGAGGGTGGAACTCTAAGTATA**  
  
 AtTT7 (869) **CTGAGATCAAAGCCTTGCTATTGAACATGTTTACAGCTGGAAGTACACGTCAGCAAGTA**  
 BnTT7 (889) **CAGAGATCAAAGCCTTGCTATTGAACATGTTTACGGCTGGAAGTACACGTCAGCAAGTA**  
 BrTT7-1 (863) **CAGAGATCAAAGCCTTGCTATTGAACATGTTTACGGCTGGAAGTACACGTCAGCAAGTA**  
 BrTT7-2 (863) **CAGAGATCAAAGCCTTGCTATTGAACATGTTTACGGCTGGAAGTACACGTCAGCAAGTA**  
 BrTT7-3 (863) **CAGAGATCAAAGCCTTGCTATTGAACATGTTTACGGCTGGAAGTACACGTCAGCAAGTA**  
 BoTT7 (863) **CTGAGATCAAAGCCTTGCTATTGAACATGTTTACGGCTGGAAGTACACGTCAGCAAGTA**  
  
 AtTT7 (929) **CGGTGGACTGGGCTATAGCTGAACCTATCCGTACCCGGATATAATGGTTAAAGCCCAAG**  
 BnTT7 (949) **CGGTGGACTGGGCCATAGCTGAACCTATCCGTACCCGGAGATAATGAGAAAAGCCCAAG**  
 BrTT7-1 (923) **CGGTGGACTGGGCCATAGCTGAATTAATCCGTACCCGGAGATAATGAGAAAAGCCCAAG**  
 BrTT7-2 (923) **CGGTGGACTGGGCCATAGCTGAATTAATCCGTACCCGGAGATAATGAGAAAAGCCCAAG**  
 BrTT7-3 (923) **CGGTGGACTGGGCCATAGCTGAATTAATCCGTACCCGGAGATAATGAGAAAAGCCCAAG**  
 BoTT7 (923) **CGGTGGACTGGGCCATAGCTGAATTAATCCGTACCCGGAAATAATGAGAAAAGCCCAAG**  
  
 AtTT7 (989) **AAGAAGCTTGATATTGTTGTGGGCCGTGACAGGCCGTTAATGAATCAGACATCGCTCAGC**  
 BnTT7 (1009) **AAGAGCTTGACTCCGTCGTGGGACGTGGAAGGCCATTAACGAGTCGGACCTTTCTCAGC**  
 BrTT7-1 (983) **AAGAGCTTGACTCCGTCGTGGGACGTGGAAGGCCATTAACGAGTCGGACCTTTCTCAGC**  
 BrTT7-2 (983) **AAGAGCTTGACTCCGTCGTGGGACGTGGAAGGCCATTAACGAGTCGGACCTTTCTCAGC**  
 BrTT7-3 (983) **AAGAGCTTGACTCCGTCGTGGGACGTGGAAGGCCATTAACGAGTCGGACCTTTCTCAGC**

BoTT7 (983) AAGAGCTTGATTCCGTCGTCGGACGTGGAAGGCCATTAACGAGTCGGACCTTTCTCAGC  
  
 AtTT7 (1049) TTCCTTACCTTCAGGCGGTTATCAAAGAGAATTTTCAGGCTTCATCCACCAACACCACTCT  
 BnTT7 (1069) TTCCTTACCTTCAGGCGGTTATCAAAGAGAATTTTCAGGCTTCATCCACCAACACCACTCT  
 BrTT7-1 (1043) TTCCTTACCTTCAGGCGGTTATCAAAGAGAATTTTCAGGCTTCATCCACCAACACCACTCT  
 BrTT7-2 (1043) TTCCTTACCTTCAGGCGGTTATCAAAGAGAATTTTCAGGCTTCATCCACCAACACCACTCT  
 BrTT7-3 (1043) TTCCTTACCTTCAGGCGGTTATCAAAGAGAATTTTCAGGCTTCATCCACCAACACCACTCT  
 BoTT7 (1043) TTCCTTACCTTCAGGCGGTTATCAAAGAGAATTTTCAGGCTTCATCCACCAACACCACTCT  
  
 AtTT7 (1109) CGTTACCACACATCGCATCAGAGAGCTGTGAGATCAACGGCTACCATATCCCCGAAAGGAT  
 BnTT7 (1129) CGTTACCACACATCGCATCAGAGAGCTGTGAGATCAACGGCTACCATATCCCCGAAAGGAT  
 BrTT7-1 (1103) CGTTACCACACATCGCATCAGAGAGCTGTGAGATCAACGGCTATCATATCCCCGAAAGGAT  
 BrTT7-2 (1103) CGTTACCACACATCGCATCAGAGAGCTGTGAGATCAACGGCTATCATATCCCCGAAAGGAT  
 BrTT7-3 (1103) CGTTACCACACATCGCATCAGAGAGCTGTGAGATCAACGGCTATCATATCCCCGAAAGGAT  
 BoTT7 (1103) CGTTACCACACATCGCATCAGAGAGCTGTGAGATCAACGGCTATCATATCCCCGAAAGGAT  
  
 AtTT7 (1169) CGACTCTATTGACGAACATATGGGCCATAGCCCGTGACCCGGATCAATGGTCCGACCCGT  
 BnTT7 (1189) CAACCTTTTGGACAAACATATGGGCCATAGCCCGTGACCCGGATCAATGGTCCGACCCGT  
 BrTT7-1 (1163) CAACCTTTTGGACAAACATATGGGCCATAGCCCGTGACCCGGATCAATGGTCCGACCCGT  
 BrTT7-2 (1163) CAACCTTTTGGACAAACATATGGGCCATAGCCCGTGACCCGGATCAATGGTCCGACCCGT  
 BrTT7-3 (1163) CAACCTTTTGGACAAACATATGGGCCATAGCCCGTGACCCGGATCAATGGTCCGACCCGT  
 BoTT7 (1163) CAACCTTTTGGACAAACATATGGGCCATAGCCCGTGACCCGGATCAATGGTCCGACCCGT  
  
 AtTT7 (1229) TAGCATTTAAACCCGAGAGATTTACCCGGTGGTGAAAAATCCGGCGTTGATGTGAAAG  
 BnTT7 (1249) TAACGTTTCGACCCGAGAGATTTTACCCGGTGGTGAAAAAGCTGGCGTTGATGTGAAAG  
 BrTT7-1 (1223) TAACGTTTCGACCCGAGAGATTTTACCCGGTGGTGAAAAAGCCGGCGTTGATGTGAAAG  
 BrTT7-2 (1223) TAACGTTTCGACCCGAGAGATTTTACCCGGTGGTGAAAAAGCCGGCGTTGATGTGAAAG  
 BrTT7-3 (1223) TAACGTTTCGACCCGAGAGATTTTACCCGGTGGTGAAAAAGCCGGCGTTGATGTGAAAG  
 BoTT7 (1223) TATCGTTTCGACCCGAGAGATTTTACCCGGTGGTGAAAAAGCCGGCGTTGATGTGAAAG  
  
 AtTT7 (1289) GAAACGATTTTCGAGCTTATAACCGTTCGGAGCTGGGAGGAGAATCTGTCGCCGGTTTAAAGTT  
 BnTT7 (1309) GAAACGATTTTCGAGCTTATAACCGTTCGGAGCTGGGAGGAGAATCTGTCGCCGGTTTAAAGTT  
 BrTT7-1 (1283) GAAACGATTTTCGAGCTTATAACCGTTCGGAGCTGGGAGGAGAATCTGTCGCCGGTTTAAAGTT  
 BrTT7-2 (1283) GAAACGATTTTCGAGCTTATAACCGTTCGGAGCTGGGAGGAGAATCTGTCGCCGGTTTAAAGTT  
 BrTT7-3 (1283) GAAACGATTTTCGAGCTTATAACCGTTCGGAGCTGGGAGGAGAATCTGTCGCCGGTTTAAAGTT  
 BoTT7 (1283) GAAACGATTTTCGAGCTTATAACCGTTCGGAGCTGGGAGGAGAATCTGTCGCCGGTTTAAAGTT  
  
 AtTT7 (1349) TAGGGTTACGTACGATTCAGTTTCTTACGGCGACGTTGGTTCAAGGATTTGATTGGGAAT  
 BnTT7 (1369) TAGGGTTACGTACGATTCAGTTTCTTACGGCGACGTTGGTTCAAGGATTTGATTGGGAAT  
 BrTT7-1 (1343) TAGGGTTACGTACGATTCAGTTTCTTACGGCGACGTTGGTTCAAGGATTTGATTGGGAAT  
 BrTT7-2 (1343) TAGGGTTACGTACGATTCAGTTTCTTACGGCGACGTTGGTTCAAGGATTTGATTGGGAAT  
 BrTT7-3 (1343) TAGGGTTACGTACGATTCAGTTTCTTACGGCGACGTTGGTTCAAGGATTTGATTGGGAAT  
 BoTT7 (1343) TAGGGTTACGTACGATTCAGTTTCTTACGGCGACGTTGGTTCAAGGATTTGATTGGGAAT  
  
 AtTT7 (1409) TAGCTGGAGGAGTTACGCCGAGAAGCTGAATATGGAGGAGAGTTATGGGCTTACTCTAC  
 BnTT7 (1429) TGGCCGGAGGAGTTACGCCGAGAAGCTGAATATGGAGGAGAGTTATGGGCTTACTCTAC  
 BrTT7-1 (1403) TGGCCGGAGGAGTTACGCCGAGAAGCTGAATATGGAGGAGAGTTATGGGCTTACTCTAC  
 BrTT7-2 (1403) TGGCCGGAGGAGTTACGCCGAGAAGCTGAATATGGAGGAGAGTTATGGGCTTACTCTAC  
 BrTT7-3 (1403) TGGCCGGAGGAGTTACGCCGAGAAGCTGAATATGGAGGAGAGTTATGGGCTTACTCTAC  
 BoTT7 (1403) TGGCCGGAGGAGTTACGCCGAGAAGCTGAATATGGAGGAGAGTTATGGGCTTACTCTAC  
  
 AtTT7 (1469) AAAGAGCGGTTCCCTTTGGTTGTGCATCCTAAGCCAAGGTTGGCTCCGAACGTTTATGGAC  
 BnTT7 (1489) AAAGAGCGGTTCCCTTTGGTTGTGCATCCTAAGCCAAGGTTGGATATGAGTGCTTATGGAC  
 BrTT7-1 (1463) AAAGAGCGGTTCCCTTTGGTTGTGCATCCTAAGCCAAGGTTGGATATGAGTGCTTATGGAC  
 BrTT7-2 (1463) AGAGAGCGGTTCCCTTTGGTTGTGCATCCTAAGCCAAGGTTGGATAGGAGTGCTTACGGAC  
 BrTT7-3 (1463) AGAGAGCGGTTCCCTTTGGTTGTGCATCCTAAGCCAAGGTTGGATAGGAGTGCTTACGGAC  
 BoTT7 (1463) AAAGAGCGGTTCCCTTTGGTTGTGCATCCTAAGCCAAGGTTGGATATGAGTGCTTACGGAC  
  
 AtTT7 (1529) TCGGGTCGGCTTAA-----  
 BnTT7 (1549) TCGGGTCGGCTTAAACCTAACTTAGCTTGCATGACAAGCTAGGTCTTGACGGTGGAAAGT  
 BrTT7-1 (1523) TCGGGTCGGCTTAA-----  
 BrTT7-2 (1523) TCGGGTCGGCTTAA-----  
 BrTT7-3 (1523) TCGGGTCGGCTTAA-----

BoTT7 (1523) **TCGGATCGGCTTAA**-----

AtTT7 (1543) -----

BnTT7 (1609) TAAAAATAAGTTTTTCGAACAGGTGTATGTTGGTCCGGAGTAAGCTGAATATAAGAGTA

BrTT7-1 (1537) -----

BrTT7-2 (1537) -----

BrTT7-3 (1537) -----

BoTT7 (1537) -----

AtTT7 (1543) -----

BnTT7 (1669) TATGTAACCTCTCAAATTAAGTAAATTAAGATGGTGTGATTTGTTGTATGTTGTCTGCATG

BrTT7-1 (1537) -----

BrTT7-2 (1537) -----

BrTT7-3 (1537) -----

BoTT7 (1537) -----

AtTT7 (1543) -----

BnTT7 (1729) GACAAGACGATGGCTGTCTGAAGCAAACCCGTTTCAATTATGTGTGTTTCATACCCACGAC

BrTT7-1 (1537) -----

BrTT7-2 (1537) -----

BrTT7-3 (1537) -----

BoTT7 (1537) -----

AtTT7 (1543) -----

BnTT7 (1789) GTTACATTTCATAATATGATGCCTTTAAAAATTCAAAAAAAAAAAAAAAA

BrTT7-1 (1537) -----

BrTT7-2 (1537) -----

BrTT7-3 (1537) -----

BoTT7 (1537) -----

18011846

## 7. BnTT3

AtTT3 (1) -----ATGGTTAGTCA**GAAAGAGACCGTGTGTGTAACCGG**

BnTT3 (1) -----ATGGTAGTCA**CAAAGAGACCGTGTGCGTAACCGG**

BrTT3-1 (1) GCATCCTTCTAACACACACAAATTA**ATGGTAGTCA**C**AAAGAGACCGTGTGCGTAACCGG**

BrTT3-2 (1) -----ATGGTAGTCA**CAAAGAGACCGTGTGCGTAACCGG**

BoTT3-1 (1) GCATCCTTCTAACACACACAAATTA**ATGGTAGTCA**C**AAAGAGACCGTGTGCGTAACCGG**

BoTT3-2 (1) -----ATGGTAGTCA**CAAAGAGACCGTGTGCGTAACCGG**

BjTT3 (1) -----ATGGTAGTCA**GAAAGAGACCGTGTGCGTAACCGG**

AtTT3 (36) **CGCTTCGGGTTTCATCGGTTTCATGGCTAGTGATGCGATTACTAGAACGTGGTTACTTTGT**

BnTT3 (36) **CGCATCAGGATTCATTGGTTTCATGGCTCGTGATGCGGCTACTGGAACGTGGTTACTTTGT**

BrTT3-1 (61) **CGCATCAGGATTCATTGGTTTCATGGCTCGTGATGCGGCTACTGGAACGTGGTTACTTTGT**

BrTT3-2 (36) **CGCATCAGGATTCATTGGTTTCATGGCTCGTGATGCGGCTACTGGAACGTGGTTACTTTGT**

BoTT3-1 (61) **CGCATCAGGATTCATTGGTTTCATGGCTCGTGATGCGGCTACTGGAACGTGGTTACTTTGT**

BoTT3-2 (36) **CGCATCAGGATTCATTGGTTTCATGGCTCGTGATGCGGCTACTGGAACGTGGTTACTTTGT**

BjTT3 (36) **CGCATCAGGATTCATTGGTTTCATGGCTCGTGATGCGGCTACTGGAACGTGGTTACTTTGT**

AtTT3 (96) **TCGTGCCACCGTTCGAGATCCCGTAATTTGAAGAAAGTACAACATCTTCTTGATTTGCC**

BnTT3 (96) **CCGTGCCACTGTTTCGCGATCCTGGAAATTTGAAGAAAGTGCAACATCTTCTTGATTTGCC**

BrTT3-1 (121) **CCGTGCCACTGTTTCGCGATCCTGGAAATTTGAAGAAAGTGCAACATCTTCTTGATTTGCC**

BrTT3-2 (96) **CCGTGCCACTGTTTCGCGATCCTGGAAATTTGAAGAAAGTGCAACATCTTCTTGATTTGCC**

BoTT3-1 (121) **CCGTGCCACTGTTTCGCGATCCTGGAAATTTGAAGAAAGTGCAACATCTTCTTGATTTGCC**

BoTT3-2 (96) **CCGTGCCACTGTTTCGCGATCCTGGAAATTTGAAGAAAGTGCAACATCTTCTTGATTTGCC**

BjTT3 (96) **CCGTGCCACTGTTTCGCGATCCTGGAAATTTGAAGAAAGTGCAACATCTTCTTGATTTGCC**

AtTT3 (156) **AAACGCGAAGACGCTACTCACTTTATGGAAAGCGTATTATCTGAGGAAGGAAGCTACGA**

BnTT3 (156) **AAACGCGAAGACGCAACTCACTTTATGGAAAGCCGATTTATCTGACGAAGGAAGCCACGA**

BrTT3-1 (181) **AAACGCGAAGACGCAACTCACTTTATGGAAAGCCGATTTATCTGACGAAGGAAGCTACGA**

BrTT3-2 (156) **AAACGCGAAGACGCAACTCACTTTATGGAAAGCCGATTTATCTGACGAAGGAAGCTACGA**

BoTT3-1 (181) **AAACGCGAAGACGCAACTCACTTTATGGAAAGCCGATTTATCTGACGAAGGAAGCTACGA**

BoTT3-2 (156) **AAACGCGAAGACGCAACTCACTTTATGGAAAGCCGATTTATCTGACGAAGGAAGCTACGA**

BjTT3 (156) **AAACGCGAAGACGCAACTCACTTTATGGAAAGCCGATTTATCTGACGAAGGAAGCTACGA**

AtTT3 (216) TGATGCCATAAACGGATGTGACGGTGTTCACATAGCAACTCCCATGGATTTTGAATC  
 BnTT3 (216) TGACGCCATAAACGGATGCGACGGCGTTTCCACATAGCAACTCCCATGGATTTTGAATC  
 BrTT3-1 (241) TGACGCCATAAACGGATGCGACGGCGTTTTCACATAGCTACTCCCATGGATTTTGAATC  
 BrTT3-2 (216) TGACGCCATAAACGGATGCGACGGCGTTTTCACATAGCAACTCCCATGGATTTTGAATC  
 BoTT3-1 (241) TGACGCCATAAACGGATGCGACGGCGTTTTCACATAGCTACTCCCATGGATTTTGAATC  
 BoTT3-2 (216) TGACGCCATAAACGGATGCGACGGCGTTTTCACATAGCTACTCCCATGGATTTTGAATC  
 BjTT3 (216) TGACGCCATAAACGGATGCGACGGCGTTTTCACATAGCAACTCCCATGGATTTTGAATC

AtTT3 (276) AAAAGATCCTGAGAACGAAGTGATAAAGCCGACAGTGAATGGAATGTTGGGGATAATGAA  
 BnTT3 (276) TAAGGACCCCGAGAACGAAGTGATAAAACCGACA GTGAATGGAGTGTGGGGATAATGAA  
 BrTT3-1 (301) AAAGGATCCCAGAACGAAGTGATAAAACCAACAGTGAATGGAGTGTGGGGATAACGAA  
 BrTT3-2 (276) TAAGGACCCCGAGAACGAAGTGATAAAACCGACAGTGAATGGAGTGTGGGGATAATGAA  
 BoTT3-1 (301) AAAGGATCCCAGAACGAAGTGATAAAACCAACAGTGAATGGAGTGTGGGGATAACGAA  
 BoTT3-2 (276) CAAGGATCCCAGAACGAAGTGATAAAACCAACAGTGAATGGAGTGTGGGGATAATGAA  
 BjTT3 (276) TAAGGACCCCGAGAACGAAGTGATAAAACCGACAGTGAATGGAGTGTGGGGATAATGAA

AtTT3 (336) AGCATGTGTTAAGGCAAAGACCGTACGAAGATTCGTATTTACTTTCATCTGCGCGAACCGT  
 BnTT3 (336) AGCATGTGATAAAGCAAAGACCGTACGAAGAATTGTGTTTACTTCTGCTGGAACCGT  
 BrTT3-1 (361) AGCATGTGATAAAGCAAAGACCGTACGAAGAATTGTGTTTACTTCTGCTGGAACCGT  
 BrTT3-2 (336) AGCATGTGATAAAGCAAAGACCGTACGAAGAATTGTGTTTACTTCTGCTGGAACCGT  
 BoTT3-1 (361) AGCATGTGATAAAGCAAAGACCGTACGAAGAATTGTGTTTACTTCTGCTGGAACCGT  
 BoTT3-2 (336) AGCATGTGATAAAGCAAAGACCGTACGAAGAATTGTGTTTACTTCTGCTGGAACCGT  
 BjTT3 (336) AGCATGTGATAAAGCAAAGACCGTACGAAGAATTGTGTTTACTTCTGCTGGAACCGT

AtTT3 (396) TAATGTAGAAGAATCAGAAAGATGTCTATGATGAAAATGATTGGAGTGATCTTGACTT  
 BnTT3 (396) TAATGTTGAGGAACACCAGAAAAATGTCTATGATGAAAACGATTGGAGTGATCTTGACTT  
 BrTT3-1 (421) TAATGTTGAGGAACACCAGAAAAATGTCTATGATGAAAACGATTGGAGTGATCTTGACTT  
 BrTT3-2 (396) TAATGTTGAGGAACACCAGAAAAATGTCTATGATGAAAACGATTGGAGTGATCTTGACTT  
 BoTT3-1 (421) TAATGTTGAGGAACACCAGAAAAATGTCTATGATGAAAACGATTGGAGTGATCTTGACTT  
 BoTT3-2 (396) TAATGTTGAGGAACACCAGAAAAATGTCTATGATGAAAACGATTGGAGTGATCTTGACTT  
 BjTT3 (396) TAGTGTGAGGAACACCAGAAAAATGTCTATGATGAAAACGATTGGAGTGATCTTGACTT

AtTT3 (456) TATCATGTCCAAAAGATGACAGGATGGATGTATTTCTGTGCAAAAACGTTAGCCGAGAA  
 BnTT3 (456) TATCATGTCCAAGAAGATGACAGGATGGATGTATTTCTGTGCAAAAACGTTAGCCGAGAA  
 BrTT3-1 (481) TATCATGTCCAAGAAGATGACAGGATGGATGTATTTCTGTGCAAAAACGTTAGCCGAGAA  
 BrTT3-2 (456) TATCATGTCCAAGAAGATGACAGGATGGATGTATTTCTGTGCAAAAACGTTAGCCGAGAA  
 BoTT3-1 (481) TATCATGTCCAAGAAGATGACAGGATGGATGTATTTCTGTGCAAAAACGTTAGCCGAGAA  
 BoTT3-2 (456) TATCATGTCCAAGAAGATGACAGGATGGATGTATTTCTGTGCAAAAACGTTAGCCGAGAA  
 BjTT3 (456) TATCATGTCCAAGAAGATGACAGGATGGATGTATTTCTGTGCAAAAACGTTAGCCGAGAA

AtTT3 (516) AGCAGCGTGGGATTTGCGCGAAGGAAAAGGATTAGATTTTCATTAGTATTATCCCGACATT  
 BnTT3 (516) AGCAGCTTGGGATTAACGCGAAGGAAAAGGATAGATTTTCATTAGTATTATCCCGACATT  
 BrTT3-1 (541) AGCAGCTTGGGATTAACGCGAAGGAAAAGGATAGATTTTCATTAGTATTATCCCGACATT  
 BrTT3-2 (516) AGCAGCTTGGGATTAACGCGAAGGAAAAGGATAGATTTTCATTAGTATTATCCCGACATT  
 BoTT3-1 (541) AGCAGCTTGGGATTAACGCGAAGGAAAAGGATAGATTTTCATTAGTATTATCCCGACATT  
 BoTT3-2 (516) AGCAGCTTGGGATTAACGCGAAGGAAAAGGATAGATTTTCATTAGTATTATCCCGACATT  
 BjTT3 (516) AGCAGCTTGGGATTAACGCGAAGGAAAAGGATAGATTTTCATTAGTATTATCCCGACATT

AtTT3 (576) GGTGATCGGTCCATTTATAACAACATCTATGCCGCTAGCCTTATTACCGCGCTCTCTCC  
 BnTT3 (576) GGTGATCGGTCCATTTATAACAACATCTATGCCGCTAGCCTTATTACCGCGCTCTCTCC  
 BrTT3-1 (601) GGTGATCGGTCCATTTATAACAACATCTATGCCGCTAGCCTTATTACCGCGCTCTCTCC  
 BrTT3-2 (576) GGTGATCGGTCCATTTATAACAACATCTATGCCGCTAGCCTTATTACCGCGCTCTCTCC  
 BoTT3-1 (601) GGTGATCGGTCCATTTATAACAACATCTATGCCGCTAGCCTTATTACCGCGCTCTCTCC  
 BoTT3-2 (576) GGTGATCGGTCCATTTATAACAACATCTATGCCGCTAGCCTTATTACCGCGCTCTCTCC  
 BjTT3 (576) GGTGATCGGTCCATTTATAACAACATCTATGCCGCTAGCCTTATTACCGCGCTCTCTCC

AtTT3 (636) TATCACTCGGAACGAGGCGCATTACTCCATCATAAGACAAGGACAGTATGTGCCACTTGGAA  
 BnTT3 (636) TATCACTCGTAACGAGGCACATTACTCCATCATAAGACAAGGACAGTATGTGCCACTTGGAA  
 BrTT3-1 (661) TATCACTCGTAACGAGGCACATTACTCCATCATAAGACAAGGACAGTATGTGCCACTTGGAA  
 BrTT3-2 (636) TATCACTCGTAACGAGGCACATTACTCCATCATAAGACAAGGACAGTATGTGCCACTTGGAA  
 BoTT3-1 (661) TATCACTCGTAACGAGGCACATTACTCCATCATAAGACAAGGACAGTATGTGCCACTTGGAA  
 BoTT3-2 (636) TATCACTCGTAACGAGGCACATTACTCCATCATAAGACAAGGACAGTATGTGCCACTTGGAA  
 BjTT3 (636) TATCACTCGTAACGAGGCACATTACTCCATCATAAGACAAGGACAGTATGTGCCACTTGGAA

AtTT3 (696) CGACTTATGCAACGCTCATATCTTCTTATACGAACAAGCAGCCGCCAAGGGACGTTATAT  
 BnTT3 (696) CGATTTATGCAATGCCCATATATTTCTTGTACGAACAAGCTGCTGCCAAGGGACGTTATGT  
 BrTT3-1 (721) CGATTTATGCAATGCCCATATATTTCTTGTACGAACAAGCTGCTGCCAAGGGACGTTATGT  
 BrTT3-2 (696) CGATTTATGCAATGCCCATATATTTCTTGTACGAACAAGCTGCTGCCAAGGGACGTTATGT  
 BoTT3-1 (721) CGACTTATGCAATGCTCATATATTTCTTGTACGAACAAGCTGCTGCCAAGGGACGTTATAT  
 BoTT3-2 (696) CGACTTATGCAATGCTCATATATTTCTTGTACGAACAAGCTGCTGCCAAGGGACGTTATGT  
 BjTT3 (696) CGATTTATGCAATGCCCATATATTTCTTGTACGAACAAGCTGCTGCCAAGGGACGTTATGT

AtTT3 (756) TTGTTCCCTCTCATGATGCAACCATTCTTACTATCTCCAATTTCTCAGGCCAAAAATACCC  
 BnTT3 (756) TTGTTCCCTCTCAGATGCAACGATTCTTACTATCTCCGAGTTTCTCAGGCCAAAAATATCC  
 BrTT3-1 (781) TTGTTCCCTCTCAGATGCAACGATTCTTACTATCTCCGAGTTTCTCAGGCCAAAAATATCC  
 BrTT3-2 (756) TTGTTCCCTCTCAGATGCAACGATTCTTACTATCTCCGAGTTTCTCAGGCCAAAAATATCC  
 BoTT3-1 (781) TTGTTCCCTCTCAGATGCGACGATTCTTACTATCTCCGAGTTTCTCAGGCCAAAAATACCC  
 BoTT3-2 (756) TTGTTCCCTCTCAGATGCAACGATTCTTACTATCTCCGAGTTTCTCAGGCCAAAAATATCC  
 BjTT3 (756) TTGTTCCCTCTCAGATGCAACGATTCTTACTATCTCCGAGTTTCTCAGGCCAAAAATATCC

AtTT3 (816) CGAATATAACGTACCTTCAACGTTTGAAGGTGTTGATGAGAATCTAAAGAGCATTGAATT  
 BnTT3 (816) AGAATATAACGTGCCTTCAACGTTTGAAGGAGTGGATGAGAATCTAAAGAGCATTATGTT  
 BrTT3-1 (841) AGAATATAACGTGCCTTCAACGTTTGAAGGAGTGGATGAGAATCTAAAGAGCATTATGTT  
 BrTT3-2 (816) AGAATATAACGTGCCTTCAACGTTTGAAGGAGTGGATGAGAATCTAAAGAGCATTATGTT  
 BoTT3-1 (841) AGAATATAACGTGCCTTCAACGTTTGAAGGAGTGGATGAGAATCTAAAGAGCATTATGTT  
 BoTT3-2 (816) AGAATATAACGTGCCTTCAACGTTTGAAGGAGTGGATGAGAATCTAAAGAGCATTATGTT  
 BjTT3 (816) AGAATATAACGTGCCTTCAACGTTTGAAGGAGTGGATGAGAATCTAAAGAGCATTATGTT

AtTT3 (876) CAGTTCCAAGAAGCTGACGGACATGGGGTTTAACTTCAAGTATAGTCTCGAGGAAATGTT  
 BnTT3 (876) CAGTTCCAAGAAGCTGATTGATATGGGATTTAACTTCAAGTATAGTCTCGAGGATATGTT  
 BrTT3-1 (901) CAGTTCCAAGAAGCTGATTGATATGGGATTTAACTTCAAGTATAGTCTCGAGGATATGTT  
 BrTT3-2 (876) CAGTTCCAAGAAGCTGATTGATATGGGATTTAACTTCAAGTATAGTCTCGAGGATATGTT  
 BoTT3-1 (901) CAGTTCCAAGAAGCTGATTGATATGGGATTTAACTTCAAGTATAGTCTCGAGGATATGTT  
 BoTT3-2 (876) CAGTTCCAAGAAGCTGATTGATATGGGATTTAACTTCAAGTATAGTCTCGAGGATATGTT  
 BjTT3 (876) CAGTTCCAAGAAGCTGATTGATATGGGATTTAACTTCAAGTATAGTCTCGAGGATATGTT

AtTT3 (936) TATTGAATCTATTGAGACATGTCGTCAAAAGGGTTTTCTCCCGTTTTATTATCGTACCA  
 BnTT3 (936) GGTGGAATCGATTGAGACATGTCGTCAAAAGGGTTTTCTCCCTGTCACTTTACCGGAACA  
 BrTT3-1 (961) GGTGGAATCGATTGAGACATGTCGTCAAAAGGGTTTTCTCCCTGTCACTTTACCGGAACA  
 BrTT3-2 (936) GGTGGAATCGATTGAGACATGTCGTCAAAAGGGTTTTCTCCCTGTCACTTTACCGGAACA  
 BoTT3-1 (961) GGTGGAATCGATTGAGACATGTCGTCAAAAGGGTTTTCTCCCTGTCACTTTACCGGAACA  
 BoTT3-2 (936) GGTGGAATCGATTGAGACATGTCGTCAAAAGGGTTTTCTCCCTGTCACTTTACCGGAACA  
 BjTT3 (936) GGTGGAATCGATTGAGACATGTCGTCAAAAGGGTTTTCTCCCTGTCACTTTACCGGAACA

AtTT3 (996) ATCCATATCGGAGATCAAGACTAAGA-----ATGAAAACATTGACGTCAAAAACCGGAGA  
 BnTT3 (996) TTTGAAATCTGAGGACAAAGTCCCGGCAGTGATGATAATAAGGAGATTAAAAACGGATC  
 BrTT3-1 (1021) TTTGAAATCTGAGGACAAAGTCCCGGCAGTGATGATAATAAGGAGATTAAAAACGGATC  
 BrTT3-2 (996) TTTGAAATCTGAGGACAAAGTCCCGGCAGTGATGATAATAAGGAGATTAAAAACGGATC  
 BoTT3-1 (1021) TTTGAAATCTGAGGACAGAGTCCCGGCAGTGATGACAATAAGGAGATTAAAAACGGATC  
 BoTT3-2 (996) TTTGAAATCTGAGGACAAAGTCCCGGCAGTGATGACAATAAGGAGATTAAAAACGGATC  
 BjTT3 (996) TTTGAAATCTGAGGACAAAGTCCCGGCAGTGATGATAATAAGGAGATTAAAAACGGATC

AtTT3 (1050) T---GGTTTAAACCGATGGTATGAAGCCATGTAACAAGACAGAAAACGGGGATAACCGGCCA  
 BnTT3 (1056) TGCAGGTTTAACTGATGGTATGGTAGCTTGTAAGAAGACCGAACAGGGATGGCCGGCGA  
 BrTT3-1 (1081) TGCAGGTTTAACTGATGGTATGGTAGCTTGTAAGAAGACCGAACAGGGATGGCCGGCGA  
 BrTT3-2 (1056) TGCAGGTTTAACTGATGGTATGGTAGCTTGTAAGAAGACCGAACAGGGATGGCCGGCGA  
 BoTT3-1 (1081) TGCAGGTTTAACTGATGGTATGGTAGCTTGTAAGAAGACCGAACAGGGATGGTCCGGCGA  
 BoTT3-2 (1056) TGCAGGTTTAACTGATGGTATGGTAGCTTGTAAGAAGACCGAACAGGGATGGCCGGCGA  
 BjTT3 (1056) TGCAGGTTTAACTGATGGTATGGTAGCTTGTAAGAAGACCGAACAGAGATGGCCGGCGA

AtTT3 (1107) GAGAACCGATGCTCCATGCTAGCACAACAGATGTGTGCTAG-----  
 BnTT3 (1116) GAAAGCCGATAGTCACATGTCGGCACAGCAGATCTGTGCTTAG-----  
 BrTT3-1 (1141) GAAAGCCGATAGTCACATGTCGGCACAGCAGATCTGTGCTTAGAAAATTGAACCCGTATCT  
 BrTT3-2 (1116) GAAAGCCGATAGTCACATGTCGGCACAGCAGATCTGTGCTTAG-----  
 BoTT3-1 (1141) GAAAGCCGATAGTCACATGTCGGCACAGCAGATCTGTGCTTAGAAAATTGAACCCGTATCT  
 BoTT3-2 (1116) GAAAGCCGATAGTCACATGTCGGCACAGCAGATCTGTGCTTAG-----

BjTT3 (1116) GAAAGCCGATAGTCACATGTCGGCACAGCAGATCTGTGCTTA-----  
 AtTT3 (1150) -----  
 BnTT3 (1159) -----  
 BrTT3-1 (1201) AATATGGATCTATTGTCTTATGAATGTGTGATTGTGTTTTTTTTTTCTTTTAAAGTTTGT  
 BrTT3-2 (1159) -----  
 BoTT3-1 (1201) AATATGGATCTATTGTCTTATGAATGTGTGATT--T-----TTTTTTTTTAAAGTTTGT  
 BoTT3-2 (1159) -----  
 BjTT3 (1158) -----

AtTT3 (1150) -----  
 BnTT3 (1159) -----  
 BrTT3-1 (1261) ATGAAAGTGTTGTGGACTTATTTATGGTATATGATA---TCATGTGTGAGTGTGAAAAAA  
 BrTT3-2 (1159) -----  
 BoTT3-1 (1252) ATGAAAGTGTTGTGGACTTATTTATGGTATCTGATAGTATCATGTGTGAGTGTGAAAAAT  
 BoTT3-2 (1159) -----  
 BjTT3 (1158) -----

AtTT3 (1150) -----  
 BnTT3 (1159) -----  
 BrTT3-1 (1318) AAAAAAAAA-----  
 BrTT3-2 (1159) -----  
 BoTT3-1 (1312) TATGAATCAATATTATTAATAAAAAAAAAAAAAAAAAAAAAAAAAAAAAAAAAAAAA  
 BoTT3-2 (1159) -----  
 BjTT3 (1158) -----

1381

AtTT3 (1150) --  
 BnTT3 (1159) --  
 BrTT3-1 (1328) --  
 BrTT3-2 (1159) --  
 BoTT3-1 (1372) AA  
 BoTT3-2 (1159) --  
 BjTT3 (1158) --

**8. BnTT18**

AtTT18 (1) -----  
 BnTT18-1 (1) -----  
 BnTT18-2 (1) -----  
 BnTT18-3 (1) -----  
 BnTT18-4 (1) -----  
 BnTT18-5 (1) -----  
 BnTT18-6 (1) -----  
 BrTT18-1 (1) -----  
 BrTT18-2 (1) -----  
 BrTT18-3 (1) -----  
 BoTT18 (1) -----  
 BjTT18 (1) ATAAAAACCGAGACAGAGTAAGTAGTTATTTTGTATTGCATAACTCTGTTTTTCCCCTGT

AtTT18 (1) -----ATGGTTG  
 BnTT18-1 (1) -----ATGGTGG  
 BnTT18-2 (1) -----ATGGTGG  
 BnTT18-3 (1) -----ATGGTGG  
 BnTT18-4 (1) -----ATGGTTG  
 BnTT18-5 (1) -----ATGGTTG  
 BnTT18-6 (1) -----ATGGTTG  
 BrTT18-1 (1) -----ATGGTGG  
 BrTT18-2 (1) -----ACAAGAAGTACAAGAAGATGGTGG  
 BrTT18-3 (1) -----ACAAGAAGTACAAGAAGATGGTGG  
 BoTT18 (1) -----GGGCTTTACAAGAAGTACAAGAAGATGGTGG  
 BjTT18 (61) TTTAAAAAGCTTCTTTACTTACTCTGTTTGTAGCTTTACAAGAAGTACAAGAAGATGGTTG

AtTT18 (8) CGGTTGAAAGAGTTGAGAGTCTAGCAAAAAGCGGAATCATATCGATTCCAAAAGAATATA  
 BnTT18-1 (8) CAGTTGAAAGAGTTGAGAGCTTAGCGAAAAGCGGGATCAGCTCTATCCAAAAGAATACA



BnTT18-2 (8) CAGTTGAAAGAGTTGAGAGCTTAGCAAAAAGCGGAATCAACTCCATCCCAAAGAATACA  
 BnTT18-3 (8) CAGTTGAAAGAGTTGAGAGCTTAGCAAAAAGCGGAATCAGCTCAATCCCAAAGAGAATACA  
 BnTT18-4 (8) AAGTGAAAGAGTCGAGAGCTTAGCGAAAAGCGGGATCAGCTCTATCCCAAAGAATACA  
 BnTT18-5 (8) AAGTGAAAGAGTCGAGAGCTTAGCGAAAAGCGGGATCAGCTCTATCCCAAAGAATACA  
 BnTT18-6 (8) AAGTGAAAGAGTCGAGAGCTTAGCAAAAAGCGGAATCAGCTCAATCCCAAAGAGAATACA  
 BrTT18-1 (8) CAGTTGAAAGAGTTGAGAGCTTAGCGAAAAGCGGGATCAGCTCTATCCCAAAGAATACA  
 BrTT18-2 (25) CAGTTGAAAGAGTTGAGAGCTTAGCAAAAAGCGGGATCAGCTCTATCCCAAAGAATACA  
 BrTT18-3 (25) CAGTTGAAAGAGTTGAGAGCTTAGCGAAAAGCGGGATCAGCTCTATCCCAAAGAATACA  
 BoTT18 (32) CAGTTGAAAGAGTTGAGAGCTTAGCAAAAAGCGGAATCAACTCCATCCCAAAGAATACA  
 BjTT18 (121) CAGTTGAAAGAGTTGAGAGCTTAGCAAAAAGCGGAATCAGCTCAATCCCAAAGAGAATACA  
  
 AtTT18 (68) TTCGTCCAAAAGAAGAGCTCGAGAGCATCAACGATGTTTTCTAGAAAGAGAAGAAAGAAG  
 BnTT18-1 (68) TCCGTCCAAAAGAAGAGCTCGAGAGCATCAACGACGTGTTCCAAGAAGAGAAAAAGAAG  
 BnTT18-2 (68) TCCGTCCAAAAGAAGAGCTCGAGAGCATCAACGACGTGTTCCAAGAAGAGAAAGAAG  
 BnTT18-3 (68) TCCGTCCAAAAGAAGAGCTCGAGAGCATCAACGACGTGTTCCAAGAAGAGAAAGAAG  
 BnTT18-4 (68) TCCGTCCAAAAGAAGAGCTCGAGAGCATCAACGACGTGTTCCAAGAAGAGAAAAAGAAG  
 BnTT18-5 (68) TCCGTCCAAAAGAAGAGCTCGAGAGCATCAACGACGTGTTCCAAGAAGAGAAAAAGAAG  
 BnTT18-6 (68) TCCGTCCAAAAGAAGAGCTCGAGAGCATCAACGACGTGTTCCAAGAAGAGAAAAAGAAG  
 BrTT18-1 (68) TCCGTCCAAAAGAAGAGCTCGAGAGCATCAACGACGTGTTCCAAGAAGAGAAAAAGAAG  
 BrTT18-2 (85) TCCGTCCAAAAGAAGAGCTCGAGAGCATCAACGACGTGTTCCAAGAAGAGAAAAAGAAG  
 BrTT18-3 (85) TCCGTCCAAAAGAAGAGCTCGAGAGCATCAACGACGTGTTCCAAGAAGAGAAAAAGAAG  
 BoTT18 (92) TCCGTCCAAAAGAAGAGCTCGAGAGCATCAACGACGTGTTCCAAGAAGAGAAAGAAG  
 BjTT18 (181) TCCGTCCAAAAGAAGAGCTCGAGAGCATCAACGACGTGTTCCAAGAAGAGAAAGAAG  
  
 AtTT18 (128) ACGGTCCACAAGTCCCACCATCGATCTCAAAGACATCGAGTCAGAACGATGAAAAGATCC  
 BnTT18-1 (128) ACGGTCCACAAGTCCCACCATCGATCTCAAAGACATCGAGTCAGAACGATGAAAAGATCC  
 BnTT18-2 (128) ACGGTCCACAAGTCCCACCATCGATCTCAAAGACATCGAGTCAGAACGATGAAAAGATCC  
 BnTT18-3 (128) ACGGTCCACAAGTCCCACCATCGATCTCAAAGACATCGAGTCAGAACGATGAAAAGATCC  
 BnTT18-4 (128) ACGGTCCACAAGTCCCACCATCGACTCAAAGACATCGAGTCAGAACGATGAAAAGATCC  
 BnTT18-5 (128) ACGGTCCACAAGTCCCACCATCGACTCAAAGACATCGAGTCAGAACGATGAAAAGATCC  
 BnTT18-6 (128) ACGGTCCACAAGTCCCACCATCGATCTCAAAGACATCGAGTCAGAACGATGAAAAGATCC  
 BrTT18-1 (128) ACGGTCCACAAGTCCCACCATCGACTCAAAGACATCGAGTCAGAACGATGAAAAGATCC  
 BrTT18-2 (145) ACGGTCCACAAGTCCCACCATCGACTCAAAGACATCGAGTCAGAACGATGAAAAGATCC  
 BrTT18-3 (145) ACGGTCCACAAGTCCCACCATCGACTCAAAGACATCGAGTCAGAACGATGAAAAGATCC  
 BoTT18 (152) ACGGTCCACAAGTCCCACCATCGATCTCAAAGACATCGAGTCAGAACGATGAAAAGATCC  
 BjTT18 (241) ACGGTCCACAAGTCCCACCATCGATCTCAAAGACATCGAGTCAGAACGATGAAAAGATCC  
  
 AtTT18 (188) GTGAGAAATGCATAGAGGAGCTCAAAAAGGCGGCTATGGACTGGGGAGTGATGCATTTGA  
 BnTT18-1 (188) GTGAGAAATGCATAGAGGAGCTCAAAAAGGCGGCTATGGACTGGGGAGTGATGCATTTGA  
 BnTT18-2 (188) GTGAGAAATGCATAGAGGAGCTCAAAAAGGCGGCTATGGACTGGGGAGTGATGCATTTGA  
 BnTT18-3 (188) GTGAGAAATGCATAGAGGAGCTCAAAAAGGCGGCTATGGACTGGGGAGTGATGCATTTGA  
 BnTT18-4 (188) GTGAGAAATGCATAGAGGAGCTCAAAAAGGCGGCTATGGACTGGGGAGTGATGCATTTGA  
 BnTT18-5 (188) GTGAGAAATGCATAGAGGAGCTCAAAAAGGCGGCTATGGACTGGGGAGTGATGCATTTGA  
 BnTT18-6 (188) GTGAGAAATGCATAGAGGAGCTCAAAAAGGCGGCTATGGACTGGGGAGTGATGCATTTGA  
 BrTT18-1 (188) GTGAGAAATGCATAGAGGAGCTCAAAAAGGCGGCTATGGACTGGGGAGTGATGCATTTGA  
 BrTT18-2 (205) GTGAGAAATGCATAGAGGAGCTCAAAAAGGCGGCTATGGACTGGGGAGTGATGCATTTGA  
 BrTT18-3 (205) GTGAGAAATGCATAGAGGAGCTCAAAAAGGCGGCTATGGACTGGGGAGTGATGCATTTGA  
 BoTT18 (212) GTGAGAAATGCATAGAGGAGCTCAAAAAGGCGGCTATGGACTGGGGAGTGATGCATTTGA  
 BjTT18 (301) GTGAGAAATGCATAGAGGAGCTCAAAAAGGCGGCTATGGACTGGGGAGTGATGCATTTGA  
  
 AtTT18 (248) TCAACCATGGAATACCAGCTGATCTAATGGAGCGTGTGAAGAAGTCAGGAGAAGAGTTCT  
 BnTT18-1 (248) TCAACCATGGTGTACCGGTTGAACTAATGGAGCGTGTGAAGAAGTCAGGAGAAGAGTTCT  
 BnTT18-2 (248) TCAACCATGGTGTACCGGTTGAACTAATGGAGCGTGTGAAGAAGTCAGGAGAAGAGTTCT  
 BnTT18-3 (248) TCAACCATGGTGTACCGGTTGAACTAATGGAGCGTGTGAAGAAGTCAGGAGAAGAGTTCT  
 BnTT18-4 (248) TCAACCATGGTGTACCGGTTGAACTAATGGAGCGTGTGAAGAAGTCAGGAGAAGAGTTCT  
 BnTT18-5 (248) TCAACCATGGTGTACCGGTTGAACTAATGGAGCGTGTGAAGAAGTCAGGAGAAGAGTTCT  
 BnTT18-6 (248) TCAACCATGGTGTACCGGTTGAACTAATGGAGCGTGTGAAGAAGTCAGGAGAAGAGTTCT  
 BrTT18-1 (248) TCAACCATGGTGTACCGGTTGAACTAATGGAGCGTGTGAAGAAGTCAGGAGAAGAGTTCT  
 BrTT18-2 (265) TCAACCATGGTGTACCGGTTGAACTAATGGAGCGTGTGAAGAAGTCAGGAGAAGAGTTCT  
 BrTT18-3 (265) TCAACCATGGTGTACCGGTTGAACTAATGGAGCGTGTGAAGAAGTCAGGAGAAGAGTTCT  
 BoTT18 (272) TCAACCATGGTGTACCGGTTGAACTAATGGAGCGTGTGAAGAAGTCAGGAGAAGAGTTCT  
 BjTT18 (361) TCAACCATGGTGTACCGGTTGAACTAATGGAGCGTGTGAAGAAGTCAGGAGAAGAGTTCT

AtTT18 (308) TCAGTTTGTCTGTGGAAGAGAAGGAGAAGTATGCAAACGATCAAGCCAAGGAAAGATTC  
BnTT18-1 (308) TCGGTTTGCCCGTGGAAAGAGAAGGAGAAGTATGCAAACGATCAAGCCAGCGGAAAGATTC  
BnTT18-2 (308) TCGGTTTGCCCGTGAAGAGAAGGAGAAGTATGCAAACGATCAAGCCAAGGAAAGATTC  
BnTT18-3 (308) TCGGTTTGCCCGTGAAGAGAAGGAGAAGTATGCAAACGATCAAGCCAGCGGAAAGATTC  
BnTT18-4 (308) TCGGTTTACCCGTGGAAAGAGAAGGAGAAGTATGCAAACGATCAAGCCAGCGGAAAGATTC  
BnTT18-5 (308) TCGGTTTACCCGTGGAAAGAGAAGGAGAAGTATGCAAACGATCAAGCCAGCGGAAAGATTC  
BnTT18-6 (308) TCGGTTTGCCCGTGGAAAGAGAAGGAGAAGTATGCAAACGATCAAGCCAGCGGAAAGATTC  
BrTT18-1 (308) TCGGTTTACCCGTGGAAAGAGAAGGAGAAGTATGCAAACGATCAAGCCAGCGGAAAGATTC  
BrTT18-2 (325) TCGGTTTACCCGTGGAAAGAGAAGGAGAAGTATGCAAACGATCAAGCCAGCGGAAAGATTC  
BrTT18-3 (325) TCGGTTTACCCGTGGAAAGAGAAGGAGAAGTATGCAAACGATCAAGCCAGCGGAAAGATTC  
BoTT18 (332) TCGGTTTGCCCGTGAAGAGAAGGAGAAGTATGCAAACGATCAAGCCAGGAAAGATTC  
BjTT18 (421) TCGGTTTGCCCGTGGAGGAGAAGGAGAAGTATGCAAACGATCAAGCCAGCGGAAAGATTC

AtTT18 (368) AAGGCTATGGAAGTAAATTGGCTAACACGCGAGTGGACAATTGGAATGGGAAGATTACT  
BnTT18-1 (368) AAGGTATGGAAGCAAGTTGGCTAACACGCGAGTGGACAGCTTGAGTGGGAAGATTACT  
BnTT18-2 (368) AAGGTATGGAAGCAAGTTGGCTAACACGCGAGTGGACAGCTTGAGTGGGAAGATTACT  
BnTT18-3 (368) AAGGTATGGAAGTAAATTGGCTAACACGCGAGTGGACAATTGAGTGGGAAGATTACT  
BnTT18-4 (368) AAGGTATGGAAGCAAGTTGGCTAAACGCGAGTGGACAGCTTGAGTGGGAAGATTACT  
BnTT18-5 (368) AAGGTATGGAAGCAAGTTGGCTAAACGCGAGTGGACAGCTTGAGTGGGAAGATTACT  
BnTT18-6 (368) AAGGTATGGAAGTAAATTGGCTAACACGCGAGTGGACAATTGAGTGGGAAGATTACT  
BrTT18-1 (368) AAGGTATGGAAGCAAGTTGGCTAAACGCGAGTGGACAGCTTGAGTGGGAAGATTACT  
BrTT18-2 (385) AAGGTATGGAAGCAAGTTGGCTAAACGCGAGTGGACAGCTTGAGTGGGAAGATTACT  
BrTT18-3 (385) AAGGTATGGAAGCAAGTTGGCTAAACGCGAGTGGACAGCTTGAGTGGGAAGATTACT  
BoTT18 (392) AAGGTATGGAAGCAAGTTGGCTAACACGCGAGTGGACAGCTTGAGTGGGAAGATTACT  
BjTT18 (481) AAGGTATGGAAGTAAATTGGCTAACACGCGAGTGGACAATTGAGTGGGAAGATTACT

AtTT18 (428) TCTTTCATCTTGTGTATCCTGAAGAGAAGAGAGATCTATCAATTTGGCCTAAGACACCAA  
BnTT18-1 (428) TCTTTCATCTTGTGTATCCTGAAGACAAGAGAGATCTATCACTTTGGCCTAAGACACCAA  
BnTT18-2 (428) TCTTTCATCTTGTGTATCCTGAAGACAAGAGAGATCTATCACTTTGGCCTAAGACACCAA  
BnTT18-3 (428) TCTTTCATCTTGTGTATCCTGAAGACAAGAGAGATCTATCACTTTGGCCTAAGACACCAA  
BnTT18-4 (428) TCTTTCATCTTGTGTATCCTGAAGACAAGAGAGATCTATCACTTTGGCCTAAGACACCAA  
BnTT18-5 (428) TCTTTCATCTTGTGTATCCTGAAGACAAGAGAGATCTATCACTTTGGCCTAAGACACCAA  
BnTT18-6 (428) TCTTTCATCTTGTGTATCCTGAAGACAAGAGAGATCTATCACTTTGGCCTAAGACACCAA  
BrTT18-1 (428) TCTTTCATCTTGTGTATCCTGAAGACAAGAGAGATCTATCACTTTGGCCTAAGACACCAA  
BrTT18-2 (445) TCTTTCATCTTGTGTATCCTGAAGACAAGAGAGATCTATCACTTTGGCCTAAGACACCAA  
BrTT18-3 (445) TCTTTCATCTTGTGTATCCTGAAGACAAGAGAGATCTATCACTTTGGCCTAAGACACCAA  
BoTT18 (452) TCTTTCATCTTGTGTATCCTGAAGACAAGAGAGATCTATCACTTTGGCCTAAGACACCAA  
BjTT18 (541) TCTTTCATCTTGTGTATCCTGAAGACAAGAGAGATCTATCACTTTGGCCTAAGACACCAA

AtTT18 (488) GTGATTACATAGAAGCAACGAGTGAGTACGCGAAGTGTCTTCGTTTGTAGCGACTAAAG  
BnTT18-1 (488) CTGATTACATTGAAGCTACGAGTGAGTACGCTAAGTGTCTTCGTTTGTAGCAACAAAAG  
BnTT18-2 (488) CTGATTACATTGAAGCTACGAGTGAGTACGCTAAGTGTCTTCGTTTGTAGCAACAAAAG  
BnTT18-3 (488) CTGATTACATTGAAGCAACGAGTGAGTACGCTAAGTGTCTTCGTTTGTAGCAACAAAAG  
BnTT18-4 (488) CTGATTACATTGAAGCTACGAGTGAGTACGCTAAGTGTCTTCGTTTGTAGCAACAAAAG  
BnTT18-5 (488) CTGATTACATTGAAGCTACGAGTGAGTACGCTAAGTGTCTTCGTTTGTAGCAACAAAAG  
BnTT18-6 (488) CCGATTACATTGAAGCAACGAGTGAGTACGCTAAGTGTCTTCGTTTGTAGCAACAAAAG  
BrTT18-1 (488) CTGATTACATTGAAGCTACGAGTGAGTACGCTAAGTGTCTTCGTTTGTAGCAACAAAAG  
BrTT18-2 (505) CTGATTACATTGAAGCTACGAGTGAGTACGCTAAGTGTCTTCGTTTGTAGCAACAAAAG  
BrTT18-3 (505) CTGATTACATTGAAGCTACGAGTGAGTACGCTAAGTGTCTTCGTTTGTAGCAACAAAAG  
BoTT18 (512) CTGATTACATTGAAGCTACGAGTGAGTACGCTAAGTGTCTTCGTTTGTAGCAACAAAAG  
BjTT18 (601) CTGATTACATTGAAGCAACGAGTGAGTACGCTAAGTGTCTTCGTTTGTAGCAACAAAAG

AtTT18 (548) TCTTCAAGGCTCTCTCTATCGCCCTAGGCTTAGAGCCTGACCGTCTAGAGAAAGAAGTTG  
BnTT18-1 (548) TCTTCAAGGCTCTCTCTATCGCCCTAGGCTTAGAGCCTGACCGTCTAGAGAATGAAGTGG  
BnTT18-2 (548) TCTTCAAGGCTCTCTCTATCGCCCTAGGCTTAGAGCCTGACCGTCTAGAGAATGAAGTGG  
BnTT18-3 (548) TCTTCAAGGCTCTCTCTATCGCCCTAGGCTTAGAGCCTGACCGTCTAGAGAATGAAGTGG  
BnTT18-4 (548) TCTTCAAGGCTCTCTCCATCGCCCTAGGCTTAGAGCCTGACCGTCTAGAGAAAGAAGTTG  
BnTT18-5 (548) TCTTCAAGGCTCTCTCTATCGCCCTAGGCTTAGAGCCTGACCGTCTAGAGAAAGAAGTTG  
BnTT18-6 (548) TCTTCAAGGCTCTCTCTATCGCCCTAGGCTTAGAGCCTGACCGTCTAGAGAATGAAGTGG  
BrTT18-1 (548) TCTTCAAGGCTCTCTCTATCGCCCTAGGCTTAGAGCCTGACCGTCTAGAGAAAGAAGTTG  
BrTT18-2 (565) TCTTCAAGGCTCTCTCTATCGCCCTAGGCTTAGAGCCTGACCGTCTAGAGAAAGAAGTTG  
BrTT18-3 (565) TCTTCAAGGCTCTCTCTATCGCCCTAGGCTTAGAGCCTGACCGTCTAGAGAAAGAAGTTG  
BoTT18 (572) TCTTCAAGGCTCTCTCTATCGCCCTAGGCTTAGAGCCTGACCGTCTAGAGAATGAAGTGG

BjTT18 (661) TCTTCAAGGCTCTCTATCGCCCTAGGCTTAGAGCTGACCGTCTAGAGAATGAAGTGG  
 AtTT18 (608) GTGGTTTAGAAGAGCTTCTCTCAAATGAAGATAAACTACTATCCAAAATGTCCCTCAGC  
 BnTT18-1 (608) GCGGTTTAGAAGAGCTTCTCTCAAATGAAGATCAATTACTACCCAAAATGCCCTCAGC  
 BnTT18-2 (608) GCGGTTTAGAAGAGCTTCTCTCAAATGAAGATCAATTACTACCCAAAATGCCCTCAGC  
 BnTT18-3 (608) GCGGTTTAGAAGAGCTTCTCTCAAATGAAGATAAACTACTACCCAAAATGCCCTCAGC  
 BnTT18-4 (608) GTGGTTTAGAAGAGCTTCTCTCAAATGAAGATAAACTATTACCCGAAATGCCCTCAGC  
 BnTT18-5 (608) GTGGTTTAGAAGAGCTTCTCTCAAATGAAGATAAACTATTACCCGAAATGCCCTCAGC  
 BnTT18-6 (608) GCGGTTTAGAAGAGCTTCTCTCAAATGAAGATAAACTACTACCCAAAATGCCCTCAGC  
 BrTT18-1 (608) GTGGTTTAGAAGAGCTTCTCTCAAATGAAGATAAACTATTACCCGAAATGCCCTCAGC  
 BrTT18-2 (625) GTGGTTTAGAAGAGCTTCTCTCAAATGAAGATAAACTATTACCCGAAATGCCCTCAGC  
 BrTT18-3 (625) GTGGTTTAGAAGAGCTTCTCTCAAATGAAGATAAACTATTACCCGAAATGCCCTCAGC  
 BoTT18 (632) GCGGTATAGAAGAGCTTCTGCTCAAATGAAGATCAATTACTACCCAAAATGCCCTCAGC  
 BjTT18 (721) GCGGTTTAGAAGAGCTTCTCTCAAATGAAGATAAACTACTACCCAAAATGCCCTCAGC  
  
 AtTT18 (668) CTGAGCTAGCACTCGGTGTGGAAGCTCACACCGATGTAAGCGCTTTAACTTTCATTCTAC  
 BnTT18-1 (668) **CTGAGCTAGCAC**TTGGCGTGAAGCTCACACCGATGTAAGCGCTTTGACCTTCATTCTAC  
 BnTT18-2 (668) **CTGAGCTAGCAC**TTGGCGTGAAGCTCACACCGATGTAAGCGCTTTGACCTTCATTCTAC  
 BnTT18-3 (668) **CTGAGCTAGCAC**TTGGGGTGAAGCTCACACCGATGTAAGCGCTCTGACCTTCATTCTAC  
 BnTT18-4 (668) **CTGAGCTAGCAC**TTGGCGTGAAGCTCACACAGATGTAAGCGCTCTGACCTTCATTCTAC  
 BnTT18-5 (668) **CTGAGCTAGCAC**TTGGCGTGAAGCTCACACAGATGTAAGCGCTCTGACCTTCATTCTAC  
 BnTT18-6 (668) **CTGAGCTAGCAC**TTGGGGTGAAGCTCACACCGATGTAAGCGCTCTGACCTTCATTCTAC  
 BrTT18-1 (668) CTGAGCTAGCACTTGGCGTGAAGCTCACACAGATGTAAGCGCTCTGACCTTCATTCTAC  
 BrTT18-2 (685) CTGAGCTAGCACTTGGCGTGAAGCTCACACCGATGTAAGCGCTCTGACCTTCATTCTAC  
 BrTT18-3 (685) CTGAGCTAGCACTTGGCGTGAAGCTCACACAGATGTAAGCGCTCTGACCTTCATTCTAC  
 BoTT18 (692) CTGAGCTAGCACTTGGCGTGAAGCTCACACCGATGTAAGCGCTTTGACCTTCATTCTAC  
 BjTT18 (781) CTGAGCTAGCACTTGGGGTGAAGCTCACACCGATGTAAGCGCTCTGACCTTCATTCTAC  
  
 AtTT18 (728) ACAACATGGTTCCGGGTTTGCAGCTTTTCTACGAGGGCAAATGGGTCACTGCAAAAATGTG  
 BnTT18-1 (728) ACAACATGGTTCCGGGTTTGCAGCTTTTCTACGAGGGTAAATGGGTCACTGCAAAAATGTG  
 BnTT18-2 (728) ACAACATGGTTCCGGGTTTGCAGCTTTTCTACGAGGGTAAATGGGTCACTGCAAAAATGTG  
 BnTT18-3 (728) ACAACATGGTTCCGGGTTTGCAGCTTTTCTACGAGGGTAAATGGATCACTGCAAAAATGTG  
 BnTT18-4 (728) ACAACATGGTTCCGGGCTTGCAGCTGTTCTACGAGGGTAAATGGATCACTGCAAAAATGTG  
 BnTT18-5 (728) ACAACATGGTTCCGGGCTTGCAGCTGTTCTACGAGGGTAAATGGATCACTGCAAAAATGTG  
 BnTT18-6 (728) ACAACATGGTTCCGGGTTTGCAGCTGTTCTACGAGGGTAAATGGATCACTGCAAAAATGTG  
 BrTT18-1 (728) ACAACATGGTTCCGGGCTTGCAGCTGTTCTACGAGGGTAAATGGATCACTGCAAAAATGTG  
 BrTT18-2 (745) ACAACATGGTTCCGGGTTTGCAGCTGTTCTACGAGGGTAAATGGATCACTGCAAAAATGTG  
 BrTT18-3 (745) ACAACATGGTTCCGGGCTTGCAGCTGTTCTACGAGGGTAAATGGATCACTGCAAAAATGTG  
 BoTT18 (752) ACAACATGGTTCCGGGTTTGCAGCTTTTCTACGAGGGTAAATGGGTCACTGCAAAAATGTG  
 BjTT18 (841) ACAACATGGTTCCGGGTTTGCAGCTGTTCTACGAGGGTAAATGGATCACTGCAAAAATGTG  
  
 AtTT18 (788) TTCTGATTTCGATTGTGATGCACATTGGGATACTTTGGAGATTCTTAGTAATGGGAAGT  
 BnTT18-1 (788) TTCTGATTTCGATTGTGATGCACATTGGGATACTTTGGAGATTCTTAGCAATGGGAAGT  
 BnTT18-2 (788) TTCTGATTTCGATTGTGATGCACATTGGGATACTTTGGAGATTCTTAGCAATGGGAAGT  
 BnTT18-3 (788) TTCTGATTTCGATTGTGATGCATATTGGAGATACTTTGGAGATTCTTAGTAACGGGAGGT  
 BnTT18-4 (788) TTCTGATTTCGATTGTGATGCATATTGGAGATACTTTGGAGATTCTTAGTAACGGGAGGT  
 BnTT18-5 (788) TTCTGATTTCGATTGTGATGCATATTGGAGATACTTTGGAGATTCTTAGTAACGGGAGGT  
 BnTT18-6 (788) TTCTGATTTCGATTGTGATGCATATTGGAGATACTTTGGAGATTCTTAGTAACGGGAGGT  
 BrTT18-1 (788) TTCTGATTTCGATTGTGATGCATATTGGAGATACTTTGGAGATTCTTAGTAACGGGAGGT  
 BrTT18-2 (805) TTCTGATTTCGATTGTGATGCATATTGGAGATACTTTAGAGATTCTTAGTAACGGGAGGT  
 BrTT18-3 (805) TTCTGATTTCGATTGTGATGCATATTGGAGATACTTTGGAGATTCTTAGTAACGGGAGGT  
 BoTT18 (812) TTCTGATTTCGATTGTGATGCACATTGGAGATACTTTGGAGATTCTTAGCAATGGGAAGT  
 BjTT18 (901) TTCTGATTTCGATTGTGATGCATATTGGAGATACTTTGGAGATTCTTAGTAACGGGAGGT  
  
 AtTT18 (848) ATAAGAGTATACTTCACCGTGGGTTGGTGAATAAGGAGAAGGTTAGGATTCTTTGGGCTG  
 BnTT18-1 (848) TTAAGAGTATACTTCACCGTGGATTGGTGAACAAGGAGAAGGTAAGGATTCTTTGGGCTG  
 BnTT18-2 (848) TTAAGAGTATACTTCACCGTGGATTGGTGAACAAGGAGAAGGTAAGGATTCTTTGGGCTG  
 BnTT18-3 (848) TTAAGAGTATACTTCACCGTGGGTTGGTGAACAAGGAGAAGGTAAGGATTCTTTGGGCTG  
 BnTT18-4 (848) TTAAGAGTATACTTCACCGTGGGTTGGTGAATAAGGAGAAGGTAAGGATTCTTTGGGCTG  
 BnTT18-5 (848) TTAAGAGTATACTTCACCGTGGGTTGGTGAATAAGGAGAAGGTAAGGATTCTTTGGGCTG  
 BnTT18-6 (848) TTAAGAGTATACTTCACCGTGGGTTGGTGAACAAGGAGAAGGTAAGGATTCTTTGGGCTG  
 BrTT18-1 (848) TTAAGAGTATACTTCACCGTGGGTTGGTGAATAAGGAGAAGGTAAGGATTCTTTGGGCTG  
 BrTT18-2 (865) TTAAGAGTATACTTCACCGTGGATTGGTGAATAAGGAGAAGGTAAGGATTCTTTGGGCTG

BrTT18-3 (865) TTAAGAGTATACTTCACCGTGGGTTGGTGAATAAGGAGAAGGTAAGGATTTCTTGGGCTG  
 BoTT18 (872) TTAAGAGTATACTTCACCGTGGATTGGTGAACAAGGAGAAGGTAAGGATTTCTTGGGCTG  
 BjTT18 (961) TTAAGAGTATACTTCACCGTGGGTTGGTGAACAAGGAGAAGGTAAGGATTTCTTGGGCTG  
  
 AtTT18 (908) TGTTTTGTGAACCCCAAAGGATAAGATTGTTCTTAAGCCGTTGCCGGAGATGGTGAGTG  
 BnTT18-1 (908) TGTTTTGTGAACCCCAAAGGAAAAGATTGTGCTTAAGCCATTGCCGGAGATGGTGAGTG  
 BnTT18-2 (908) TGTTTTGTGAACCCCAAAGGAAAAGATTGTGCTTAAGCCATTGCCGGAGATGGTGAGTG  
 BnTT18-3 (908) TGTTTTGTGAACCCCAAAGGATAAGATTGTGCTTAAGCCGTTGCCGGAGATGGTGAGTG  
 BnTT18-4 (908) TGTTTTGTGAACCCCAAAGGATAAGATTGTGCTTAAGCCGTTGCCGGAGATGGTGAGTG  
 BnTT18-5 (908) TGTTTTGTGAACCCCAAAGGATAAGATTGTGCTTAAGCCGTTGCCGGAGATGGTGAGTG  
 BnTT18-6 (908) TGTTTTGTGAACCCCAAAGGATAAGATTGTGCTTAAGCCGTTGCCGGAGATGGTGAGTG  
 BrTT18-1 (908) TGTTTTGTGAACCCCAAAGGATAAGATTGTGCTTAAGCCGTTGCCGGAGATGGTGAGTG  
 BrTT18-2 (925) TGTTTTGTGAACCCCAAAGGATAAGATTGTGCTTAAGCCGTTGCCGGAGATGGTGAGTG  
 BrTT18-3 (925) TGTTTTGTGAACCCCAAAGGATAAGATTGTGCTTAAGCCGTTGCCGGAGATGGTGAGTG  
 BoTT18 (932) TGTTTTGTGAACCCCAAAGGAAAAGATTGTGCTTAAGCCATTGCCGGAGATGGTGAGTG  
 BjTT18 (1021) TGTTTTGTGAACCCCAAAGGATAAGATTGTGCTTAAGCCGTTGCCGGAGATGGTGAGTG  
  
 AtTT18 (968) TTGAGTCTCCGGCTAAGTTTCCTCCAAGGACTTTTGCTCAACATATGAGCATAAGTTGT  
 BnTT18-1 (968) TTGAGTCTCCGGCTAAGTTTCCTCCAAGGACGTTTGCTCAGCATATGAGCATAAGTTGT  
 BnTT18-2 (968) TTGAGTCTCCGGCTAAGTTTCCTCCAAGGACGTTTGCTCAGCATATGAGCATAAGTTGT  
 BnTT18-3 (968) TTGAGTCTCCGGCTAAGTTTCCTCCAAGGACGTTTGCTCAGCATATGAGCATAAGTTGT  
 BnTT18-4 (968) TTGAGTCTCCGGCTAAGTTTCCTCCAAGGACGTTTGCTCAGCATATGAGCATAAGTTGT  
 BnTT18-5 (968) TTGAGTCTCCGGCTAAGTTTCCTCCAAGGACGTTTGCTCAGCATATGAGCATAAGTTGT  
 BnTT18-6 (968) TTGAGTCTCCGGCTAAGTTTCCTCCAAGGACGTTTGCTCAGCATATGAGCATAAGTTGT  
 BrTT18-1 (968) TTGAGTCTCCGGCTAAGTTTCCTCCAAGGACGTTTGCTCAGCATATGAGCATAAGTTGT  
 BrTT18-2 (985) TTGAGTCTCCGGCTAAGTTTCCTCCAAGGACGTTTGCTCAGCATATGAGCATAAGTTGT  
 BrTT18-3 (985) TTGAGTCTCCGGCTAAGTTTCCTCCAAGGACGTTTGCTCAGCATATGAGCATAAGTTGT  
 BoTT18 (992) TTGAGTCTCCGGCTAAGTTTCCTCCAAGGACGTTTGCTCAGCATATGAGCATAAGTTGT  
 BjTT18 (1081) TTGAGTCTCCGGCCAAGTTTCCTCCAAGGACGTTTGCTCAGCATATGAGCATAAGTTGT  
  
 AtTT18 (1028) TTGGAAGGAACAAGAGGAATTGGTATCCGAGAAAAATGATTAA-----  
 BnTT18-1 (1028) TCAGGAATGAGCAAGAGGAGTTGGTAACTGAGAAAAAGGATGAAGTCTGA-----  
 BnTT18-2 (1028) TCAGGAATGAGCAAGAGGAGTTGGTAACTGAGAAAAAGGATGAAGTCTGA-----  
 BnTT18-3 (1028) TTAGGAACAAGCAAGAGGAGTTGGTAACTGAGAAAAAGGATGAAGTCTGA-----  
 BnTT18-4 (1028) TTAGGAACAAGCAAGAGGAGTTGGTAACTGAGAAAAAGGATGAAGTCTGA-----  
 BnTT18-5 (1028) TTAGGAACAAGCAAGAGGAGTTGGTAACTGAGAAAAAGGATGAAGTCTGA-----  
 BnTT18-6 (1028) TTAGGAACAAGCAAGAGGAGTTGGTAACTGAGAAAAAGGATGAAGTCTAA-----  
 BrTT18-1 (1028) TTAGGAACAAGCAAGAGGAGTTGGTAACTGAGAAAAAGGATGAAGTCTGA-----  
 BrTT18-2 (1045) TTAGGAACAAGCAAGAGGAGTTGGTAACTGAGAAAAAGGATGAAGTCTGAGTCTGTGAAA  
 BrTT18-3 (1045) TTAGGAACAAGCAAGAGGAGTTGGTAACTGAGAAAAAGGATGAAGTCTGAGTCTGTGAAA  
 BoTT18 (1052) TCAGGAATGAGCAAGAGGAGTTGGTAACTGAGAAAAAGGATGAAGTCTGAGTCTATATAT  
 BjTT18 (1141) TTAGGAACAAGCAAGAGGAGTTGGTAACTGAGAAAAAGGATGAAGTCTGAGTCTGAAACT  
  
 AtTT18 (1072) -----  
 BnTT18-1 (1078) -----  
 BnTT18-2 (1078) -----  
 BnTT18-3 (1078) -----  
 BnTT18-4 (1078) -----  
 BnTT18-5 (1078) -----  
 BnTT18-6 (1078) -----  
 BrTT18-1 (1078) -----  
 BrTT18-2 (1105) CTCTATGTTTGAGC-----  
 BrTT18-3 (1105) CTCTATGTTTGAGC-----  
 BoTT18 (1112) GTCTGTGAAACTCTATGTTTGAGCTTCTCTTTTATCTTATGTTTGTGATTTTATCTGTCT  
 BjTT18 (1201) CTATGTTTGAGTTTATCTTTTATCTAATGTTTGTGATTTTATCTTGTCTTTGATGTGTG  
  
 AtTT18 (1072) -----  
 BnTT18-1 (1078) -----  
 BnTT18-2 (1078) -----  
 BnTT18-3 (1078) -----  
 BnTT18-4 (1078) -----  
 BnTT18-5 (1078) -----  
 BnTT18-6 (1078) -----

BrTT18-1 (1078) -----  
 BrTT18-2 (1119) -----  
 BrTT18-3 (1119) -----  
   BoTT18 (1172) TTTGATGTGTGTCTTATTAAGATTGTGAAGACATATTTCTATGGATTGTGTCAATTGTGA  
   BjTT18 (1261) CTTATTAAGATTGTGAAGACATATTTCTATGGATTGTGTCAATTGTGAATATGTTAAAAAA  
  
   AtTT18 (1072) -----  
 BnTT18-1 (1078) -----  
 BnTT18-2 (1078) -----  
 BnTT18-3 (1078) -----  
 BnTT18-4 (1078) -----  
 BnTT18-5 (1078) -----  
 BnTT18-6 (1078) -----  
 BrTT18-1 (1078) -----  
 BrTT18-2 (1119) -----  
 BrTT18-3 (1119) -----  
   BoTT18 (1232) TACGTTAAAGAATTATATGATTTGTAACAAAGTAAGCGTTAGAAGAAATGAGTAGAACGA  
   BjTT18 (1321) AATTGTATGATTTGTAACAAAGTAAGCGTTAGAAAAAAAAAAAAAAAAAAAAAAAAA---  
  
   AtTT18 (1072) -----  
 BnTT18-1 (1078) -----  
 BnTT18-2 (1078) -----  
 BnTT18-3 (1078) -----  
 BnTT18-4 (1078) -----  
 BnTT18-5 (1078) -----  
 BnTT18-6 (1078) -----  
 BrTT18-1 (1078) -----  
 BrTT18-2 (1119) -----  
 BrTT18-3 (1119) -----  
   BoTT18 (1292) GATATGCTCTATGAACCACATGTGTATTAAGAAGTTGAGAGTGTTCAGATTTAAAAAAA  
   BjTT18 (1378) -----  
  
   AtTT18 (1072) -----  
 BnTT18-1 (1078) -----  
 BnTT18-2 (1078) -----  
 BnTT18-3 (1078) -----  
 BnTT18-4 (1078) -----  
 BnTT18-5 (1078) -----  
 BnTT18-6 (1078) -----  
 BrTT18-1 (1078) -----  
 BrTT18-2 (1119) -----  
 BrTT18-3 (1119) -----  
   BoTT18 (1352) AAAAAAAAAA  
   BjTT18 (1378) -----

## 9. BnTT12

AtTT12 (1) -----  
 BnTT12A (1) -----AATTCACGAATTGTCTATAACTAACAGAAGA  
 BnTT12B (1) -----AATTCACGAATTGTCTATAACTAACAGAAGA  
   BrTT12 (1) -----  
 BoTT12-1 (1) AAATAAACCAAAACAAACGTTAGTAATATAATTCACGAATTGTCTATAACTAACAGAAGA  
 BoTT12-2 (1) -----  
  
   AtTT12 (1) -----ATGAGCTCCACAGAGACATACGAGCCGTTA  
 BnTT12A (32) GAAAAAAAAAAAAAAAAAAGAGGACCATGAGCTCCACAGAGACATACGAGCCGCTA  
 BnTT12B (32) GG-----AAAAAAAAGGAACCATGAGCTCCACGGAGACATACGAGCCGTTA  
   BrTT12 (1) -----ATGAGCTCCACAGAGACATACGAGCCGCTA  
 BoTT12-1 (61) G-----AAAAAAAAGGGACCATGAGCTCCACAGAGACATACGAGCCGTTA  
 BoTT12-2 (1) -----ATGAGCTCCACAGAGACATACGAGCCGTTA  
  
   AtTT12 (31) TTGACACGACTCCACTCGGATTCTCAGATAACTGAACGGTCTTCGCCAGAGATAGAGGAG  
 BnTT12A (92) TTGACACGCTCCACTCAGACTCGCAGATCACCGAACGTTCTTCACCGGAGATAGAAGAG  
 BnTT12B (80) TTGACACGCTCCACTCAGATTCTCAGATCACCGAACGTTCTTCACCGGAGATAGAAGAG

BrTT12 (31) TTGAGACGGCTCCACTCAGACTCGCAGATCACCGAACGTTCTTCACCGGAGATAGAAGAG  
 BoTT12-1 (108) TTGAGACGGCTCCACTCAGAATCGCAGATCACCGAACGTTCTTCACCGGAGATAGAAGAG  
 BoTT12-2 (31) TTGAGACGGCTCCACTCAGAATCGCAGATCACCGAACGTTCTTCACCGGAGATAGAAGAG

AtTT12 (91) TTTCTCGGCCGTGGTGGATCCACAGTGACACCACGGTGGTGGCTAAAGCTGGCAGTGTGG  
 BnTT12A (152) TTTCTCGGCCGTGGTGGATCCACAGTGACACCACGGTGGTGGCTAAAGCTGTTTGTGTGG  
 BnTT12B (140) TTTCTCGGCCGTGGTAGATCCACGGTGGTGGATCCACAGTGACACCACGGTGGTGGCTAAAGCTGTTTGTGTGG  
 BrTT12 (91) TTTCTCGGCCGTGGTGGATCCACAGTGACACCACGGTGGTGGCTAAAGCTGTTTGTGTGG  
 BoTT12-1 (168) TTTCTCGGCCGTGGTAGATCCACGGTGGTGGATCCACAGTGACACCACGGTGGTGGCTAAAGCTGTTTGTGTGG  
 BoTT12-2 (91) TTTCTCGGCCGTGGTAGATCCACGGTGGTGGATCCACAGTGACACCACGGTGGTGGCTAAAGCTGTTTGTGTGG

AtTT12 (151) GAGTCAAAGCTTCTATGGACACTCTCTGGAGCCTCTATAGTGGTCTCTGTTCTGAATTAC  
 BnTT12A (212) GAGTCAAAGCTTCTATGGAAAGCTCTCTGGAGCCTCTATTGTCTGTCTGTGCTGAACTAC  
 BnTT12B (200) GAGTCAAAGCTTCTATGGAAAGCTCTCTGGAGCCTCTATTGTCTGTCTGTGCTGAACTAC  
 BrTT12 (151) GAGTCAAAGCTTCTATGGAAAGCTCTCTGGAGCCTCTATTGTCTGTCTGTGCTGAACTAC  
 BoTT12-1 (228) GAGTCAAAGCTTCTATGGAAAGCTCTCTGGAGCCTCTATTGTCTGTCTGTGCTGAACTAC  
 BoTT12-2 (151) GAGTCAAAGCTTCTATGGAAAGCTCTCTGGAGCCTCTATTGTCTGTCTGTGCTGAACTAC

AtTT12 (211) ATGCTCAGCTTCGTACCCGTATGTTACCCGGTCACTCTCGGTTCTCTTTCAGCTCGCCGGC  
 BnTT12A (272) ATGCTCAGCTTCGTACCCGTAATGTTACCCGGCCATCTTGGTTCTCTTTCAGCTCGCCGGC  
 BnTT12B (260) ATGCTCAGCTTCGTACCCGTAATGTTACCCGGCCATCTTGGTTCTCTTTCAGCTCGCTGGC  
 BrTT12 (211) ATGCTCAGCTTCGTACCCGTAATGTTACCCGGCCATCTTGGTTCTCTTTCAGCTCGCCGGC  
 BoTT12-1 (288) ATGCTCAGCTTCGTACCCGTAATGTTACCCGGCCATCTTGGTTCTCTTTCAGCTCGCTGGC  
 BoTT12-2 (211) ATGCTCAGCTTCGTACCCGTAATGTTACCCGGCCATCTTGGTTCTCTTTCAGCTCGCTGGC

AtTT12 (271) GCTTCCATCGCCACCGTCGGAATCCAAGGCCTAGCTTACGGTATCATGTTAGGAATGGCG  
 BnTT12A (332) GCTTCCATTGCCACCGTCGGTATCCAAGGCCTCGCTTACGGTATCATGTTGGGAATGGCG  
 BnTT12B (320) GCTTCCATCGCTACCGTCGGCATCCAAGGCCTCGCTTACGGTATCATGTTGGGAATGGCG  
 BrTT12 (271) GCTTCCATTGCCACCGTCGGTATCCAAGGCCTCGCTTACGGTATCATGTTGGGAATGGCG  
 BoTT12-1 (348) GCTTCCATCGCTACCGTCGGCATCCAAGGCCTCGCTTACGGTATCATGTTGGGAATGGCG  
 BoTT12-2 (271) GCTTCCATCGCTACCGTCGGCATCCAAGGCCTCGCTTACGGTATCATGTTGGGAATGGCG

AtTT12 (331) AGCGCGGTCCAAACAGTGTGTGGTCAAGCGTACGGAGCGGAGACAGTACTCATCAATGGGA  
 BnTT12A (392) AGCGCGGTACAGACAGTATGTGGTCAAGCGTACGGCGCAAGACAGTACTCATCAATGGGA  
 BnTT12B (380) AGCGCGGTTCAGACAGTGTGTGGTCAAGCGTACGGCGCGGAGACAGTATTTCATCAATGGGA  
 BrTT12 (331) AGCGCGGTACAGACAGTGTGTGGTCAAGCGTACGGCGCAAGACAGTACTCATCAATGGGA  
 BoTT12-1 (408) AGCGCGGTCCAGACAGTGTGTGGTCAAGCGTACGGCGCGGAGACAGTATTTCATCAATGGGA  
 BoTT12-2 (331) AGCGCGGTCCAGACAGTGTGTGGTCAAGCGTACGGCGCGGAGACAGTATTTCATCAATGGGA

AtTT12 (391) ATAATCTGCCAACGAGCCATGGTCTTGCACCTTGCAGCTGCAGTCTTCCTCACGTTCCCTC  
 BnTT12A (452) ATAATCTGCCAACGAGCCATGGTCTTGCACCTCGCAGCTGCAGTCTTCCTCACGTTCCCTC  
 BnTT12B (440) ATAATCTGCCAACGAGCCATGGTCTTGCACCTCGCAGCTGCAGTCTTCCTCACGTTCCCTC  
 BrTT12 (391) ATAATCTGCCAACGAGCCATGGTCTTGCACCTCGCAGCTGCAGTCTTCCTCACGTTCCCTC  
 BoTT12-1 (468) ATAATCTGCCAACGAGCCATGGTCTTGCACCTCGCAGCTGCAGTCTTCCTCACGTTCCCTC  
 BoTT12-2 (391) ATAATCTGCCAACGAGCCATGGTCTTGCACCTCGCAGCTGCAGTCTTCCTCACGTTCCCTC

AtTT12 (451) TACTGGTACTCGGGTCCAATCCTTAAACAATGGGCAATCCGTAGCCATAGCACACGAG  
 BnTT12A (512) TACTGGTACTCTGGTCCATTCTAAAGGCAATGGGCAAAACCGTAGCCATAGCACACGAG  
 BnTT12B (500) TACTGGTACTCTGGTCCATTCTAAAGGCAATGGGCAAAACCGTAGCCATAGCACACGAG  
 BrTT12 (451) TACTGGTACTCTGGTCCATTCTAAAGGCAATGGGCAAAACCGTAGCCATAGCACACGAG  
 BoTT12-1 (528) TACTGGTACTCTGGTCCATTCTAAAGGCAATGGGCAAAACCGTAGCCATAGCACACGAG  
 BoTT12-2 (451) TACTGGTACTCTGGTCCATTCTAAAGGCAATGGGCAAAACCGTAGCCATAGCACACGAG

AtTT12 (511) GGTCAGATCTTTGCACGTGGAATGATTCACAAATTTACGCATTTGCCCTCGCTTGCCCG  
 BnTT12A (572) GGTCAGGTCTTTGCACGTGGGATGATTCCTCAGATATACGCCTTCGCTCTCGCTTGCCCT  
 BnTT12B (560) GGTCAGGTCTTTGCACGTGGGATGATTCCTCAGATATACGCCTTCGCTCTCGCTTGCCCT  
 BrTT12 (511) GGTCAGGTCTTTGCACGTGGGATGATTCCTCAGATATACGCCTTCGCTCTCGCTTGCCCT  
 BoTT12-1 (588) GGTCAGGTCTTTGCACGTGGGATGATTCCTCAGATATACGCCTTCGCTCTCGCTTGCCCT  
 BoTT12-2 (511) GGTCAGGTCTTTGCACGTGGGATGATTCCTCAGATATACGCCTTCGCTCTCGCTTGCCCT

AtTT12 (571) ATGCAGAGGTTTCTTACGGCTCAGAACATAGTGAACCCTTTGGCTTACATGTCTTAGGA  
 BnTT12A (632) ATGCAGAGGTTTCTTACGGCTCAGAACATAGTGAACCCTTTGGCTTACATGTCTTAGGA  
 BnTT12B (620) ATGCAGAGGTTTCTTACGGCTCAGAACATAGTGAACCCTTTGGCTTACATGTCTTAGGA

BrTT12 (571) ATGCAGAGGTTCCCTCCAGGCTCAGAACATAGTCAACCCTTTGGCTTACATGTCTTTAGGA  
 BoTT12-1 (648) ATGCAGAGGTTCCCTCCAGGCTCAGAACATAGTAAACCCTTTGGCTTACATGTCTTTAGGA  
 BoTT12-2 (571) ATGCAGAGGTTCCCTCCAGGCTCAGAACATAGTAAACCCTTTGGCTTACATGTCTTTAGGA

AtTT12 (631) GTTTTCTTGCTCCACACGTTACTCACGTGGCTGGTTACCAACGTGCTGGATTTCCGGCTTG  
 BnTT12A (692) GTTTTCTTGCTCCACACGTTACTCACGTGGCTTGTAACAAACGTGTTGGATTTTGGCTTG  
 BnTT12B (680) GTTTTCTTGCTCCACACGTTACTCACGTGGCTTGTAACCAACGTGTTGGATTTTGGCTTG  
 BrTT12 (631) GTTTTCTTGCTCCACACGTTACTCACGTGGCTTGTAACCAACGTGTTGGATTTTGGCTTG  
 BoTT12-1 (708) GTTTTCTTGCTCCACACGTTACTCACGTGGCTTGTAACCAACGTGTTGGATTTTGGCTTG  
 BoTT12-2 (631) GTTTTCTTGCTCCACACGTTACTCACGTGGCTTGTAACCAACGTGTTGGATTTTGGCTTG

AtTT12 (691) CTTGGGCGGGCTCTGATTCTCAGTTTCTCATGGTGGCTGCTAGTAGCTGTGAATGGTATG  
 BnTT12A (752) CTCGGTGCGGCTTTGATTCTGAGTCTCTCGTGGTGGCTGCTCGCTGCTGTGAACGGTTTG  
 BnTT12B (740) CTGGGTGCGGCTTTGATTCTAAGTTTCTCGTGGTGGCTGCTCGCTGCTGTGAACGGTTTG  
 BrTT12 (691) CTCGGTGCGGCTTTGATTCTGAGTTTCTCGTGGTGGCTGCTCGCTGCTGTGAACGGTTTG  
 BoTT12-1 (768) CTCGGTGCGGCTTTGATTCTGAGCCTCTCGTGGTGGCTGCTTGGCGCTGTGAACGGTTTG  
 BoTT12-2 (691) CTCGGTGCGGCTTTGATTCTGAGCCTCTCGTGGTGGCTGCTTGGCGCTGTGAACGGTTTG

AtTT12 (751) TATATCTTGATGAGCCCGAATTGTAGGGAGACTGGACAGGGTTTTCAACGAGGGCATT  
 BnTT12A (812) TATATCTTGATGAGCCCGAGTTGTAGGGAGACTTGACCGGGTTTTCAAGTGGCTCTT  
 BnTT12B (800) TATATCTTGATGAGCCCGAATTGTAGGGAGACTGGACCGGGTTTTCAAGTGGCTCTT  
 BrTT12 (751) TATATCTTGATGAGCCCGAATTGTAGGGAGACTTGACCGGGTTTTCAAGTGGCTCTT  
 BoTT12-1 (828) TATATCTTGATGAGCCCGAATTGTAGGGAGACTTGACCGGGTTTTCAAGTGGCTCTT  
 BoTT12-2 (751) TATATCTTGATGAGCCCGAATTGTAGGGAGACTTGACCGGGTTTTCAAGTGGCTCTT

AtTT12 (811) AGAGGGATATGGCCTTACTTGAAGCTCACGGTAGCTTCAGCAGTATGCTATGTTTGGAG  
 BnTT12A (872) ACAGGGATTTGGCCTTACTTGAAGCTCACGGTAGCTTCAGCAGTATGCTATGTTTGGAG  
 BnTT12B (860) ACAGGGATTTGGCCTTACTTGAAGCTCACGGTAGCTTCAGCAGTATGCTATGTTTGGAG  
 BrTT12 (811) ACAGGGATTTGGCCTTACTTGAAGCTCACGGTAGCTTCAGCAGTATGCTATGTTTGGAG  
 BoTT12-1 (888) ACAGGGATTTGGCCTTACTTGAAGCTCACGGTAGCTTCAGCAGTATGCTATGTTTGGAG  
 BoTT12-2 (811) ACAGGGATTTGGCCTTACTTGAAGCTCACGGTAGCTTCAGCAGTATGCTATGTTTGGAG

AtTT12 (871) ATATGGTACAACCAAGGGCTAGTGATATCTCTGGTTTACTCTCCAATCCGACAATTTCT  
 BnTT12A (932) ATATGGTACAACCAAGGGCTAGTGATATCTCTGGTTTACTCACCATCCGACAATTTCC  
 BnTT12B (920) ATATGGTACAACCAAGGGCTAGTGATATCTCTGGTTTACTCACCATCCGACAATTTCC  
 BrTT12 (871) ATATGGTACAACCAAGGGCTAGTGATATCTCTGGTTTACTCACCATCCGACAATTTCC  
 BoTT12-1 (948) ATATGGTACAACCAAGGGCTAGTGATATCTCTGGTTTACTCACCATCCGACAATTTCC  
 BoTT12-2 (871) ATATGGTACAACCAAGGGCTAGTGATATCTCTGGTTTACTCACCATCCGACAATTTCC

AtTT12 (931) CTAGACGCTATTTTCGATTTGCATGTATTACTTGAATGGGATATGCAGTTCATGCTTGGT  
 BnTT12A (992) **CTAGACGC**CATTTTCGATTTGTATGTATTACTTGAATGGGATATGCAGTTCATGCTTGGT  
 BnTT12B (980) TTAGATGCAATTTTCGATTTGCATGTATTACTTGAATGGGATATGCAGTTCATGCTTGGT  
 BrTT12 (931) TTAGATGCAATTTTCGATTTGCATGTATTACTTGAATGGGATATGCAGTTCATGCTTGGT  
 BoTT12-1 (1008) TTAGATGCAATTTTCGATTTGCATGTATTACTTGAATGGGATATGCAGTTCATGCTTGGT  
 BoTT12-2 (931) TTAGATGCAATTTTCGATTTGCATGTATTACTTGAATGGGATATGCAGTTCATGCTTGGT

AtTT12 (991) CTAAGTGCAGCAATCAGTGTGCGAGTGAGCAATGAGCTAGGAGCGGAAATCCACGAGTG  
 BnTT12A (1052) CTAAGTGCAGCAATCAGTGTCCGTGTGAGCAACGAGCTAGGAGCTGGAAATCCACGAGTG  
 BnTT12B (1040) TTAAGTGCAGCAATCAGTGTCCGTGTGAGCAACGAGCTAGGAGCTGGAAATCCACGAGTG  
 BrTT12 (991) CTAAGTGCAGCAATCAGTGTCCGTGTGAGCAACGAGCTAGGAGCTGGAAATCCACGAGTG  
 BoTT12-1 (1068) TTAAGTGCAGCAATCAGTGTCCGTGTGAGCAACGAGCTAGGAGCTGGAAATCCACGAGTG  
 BoTT12-2 (991) TTAAGTGCAGCAATCAGTGTCCGTGTGAGCAACGAGCTAGGAGCTGGAAATCCACGAGTG

AtTT12 (1051) GCTATGTTATCAGTAGTGGTTGTCAACATCACGACTGTTCTCATCAGCTCAGTTCTCTGT  
 BnTT12A (1112) **GCTAAGTTATCAGTGGT**GGTGGTGAACATCACGACTTCTCATTAGCTTACTCCTCTGT  
 BnTT12B (1100) GCTAAGTTATCAGTGGTGGTGGTGAACATCACGACTTCTCATTAGCTTACTCCTCTGT  
 BrTT12 (1051) GCTAAGTTATCAGTGGTGGTGGTGAACATCACGACTTCTCATTAGCTTACTCCTCTGT  
 BoTT12-1 (1128) GCTAAGTTATCAGTGGTGGTGGTGAACATCACGACTTCTCATTAGCTTACTCCTCTGT  
 BoTT12-2 (1051) GCTAAGTTATCAGTGGTGGTGGTGAACATCACGACTTCTCATTAGCTTACTCCTCTGT

AtTT12 (1111) GTCATCGTGCTTGTGTTCCGCTTGGCCTTAGCAAAGCCTTCCACGCGATGCAGAAGTT  
 BnTT12A (1172) ATCGTGGTGCTTGTGTTCCGCTGTCGGTCTAAGCAAAGCCTTCCACGCGACAAAGAAGTT  
 BnTT12B (1160) GTCGTTGGTGCTCGTGTCCGCTGTCGGCTAAGCAAAGCCTTCCACGCGACAAAGAAGTT

BrTT12 (1111) ATCGTGGTGCTTGTGTTCCGTGTCGGTCTAAGCAAAGCCTTCACCAGCGACAAAGAAGTT  
 BoTT12-1 (1188) GTCGTGGTGCTCGTGTTCCTGTCGGCCTAAGCAAAGCCTTCACCAGCGACAAAGAAGTT  
 BoTT12-2 (1111) GTCGTGGTGCTCGTGTTCCTGTCGGCCTAAGCAAAGCCTTCACCAGCGACAAAGAAGTT

AtTT12 (1171) ATAGCAGCCGTCCTGACCTCTTTCCCTCTCTCGCCGTTTCATTTTCTTAAACGGAATC  
 BnTT12A (1232) ATAGTGGCAGTCTCTGACCTCTTTCCCTCTCCTCGCAGTTTCGATTTTTTTAAATGGAATC  
 BnTT12B (1220) ATAGTGGCAGTCTCTGACCTCTTTCCCTCTCCTCGCAGTTTCGATTTTTTTAAATGGAATC  
 BrTT12 (1171) ATAGTGGCAGTCTCTGACCTCTTTCCCTCTCCTCGCAGTTTCGATTTTTTTAAATGGAATC  
 BoTT12-1 (1248) ATAGTGGCAGTCTCTGACCTATTTCCCTCTACTCGCAGTTTCATTTTTTTAAATGGAATC  
 BoTT12-2 (1171) ATAGTGGCAGTCTCTGACCTATTTCCCTCTACTCGCAGTTTCATTTTTTTAAATGGAATC

AtTT12 (1231) CAGCAATTCTCTCTGGGGTTGCTATTGGGAGTGGGTGGCAAGCAGTGGTGGCTTATGTG  
 BnTT12A (1292) CAACCTATTCTCTCTGGGGTTGCTATTGGAAGTGGGTGGCAAGCAGTGGTGGCTTATGTG  
 BnTT12B (1280) CAACCTATTCTCTCTGGGGTTGCTATTGGAAGTGGATGGCAAGCAGTGGTGGCTTATGTG  
 BrTT12 (1231) CAACCTATTCTCTCTGGGGTTGCTATTGGAAGTGGGTGGCAAGCAGTGGTGGCTTATGTG  
 BoTT12-1 (1308) CAACCTATTCTCTCTGGGGTTGCTATTGGAAGTGGATGGCAAGCAGTGGTGGCTTATGTG  
 BoTT12-2 (1231) CAACCTATTCTCTCTGGGGTTGCTATTGGAAGTGGATGGCAAGCAGTGGTGGCTTATGTG

AtTT12 (1291) AATCTTGTTACGTACTATATGTCATTGGTCTTCCCTATTGGCTGTGTCCTTGGCTTCAAACCC  
 BnTT12A (1352) AATCTTGTTACTTACTATATGTCATTGGTCTTCCCTATTGGCTGTGTCCTTGGCTTCAAACCA  
 BnTT12B (1340) AATCTTGTTACTTACTATATGTCATTGGTCTTCCCTATTGGCTGTGTCCTTGGCTTCAAACCA  
 BrTT12 (1291) AATCTTGTTACTTACTATATGTCATTGGTCTTCCCTATTGGCTGTGTCCTTGGCTTCAAACCA  
 BoTT12-1 (1368) AATCTTGTTACTTACTATATGTCATTGGTCTTCCCTATTGGCTGTGTCCTTGGCTTCAAACCA  
 BoTT12-2 (1291) AATCTTGTTACTTACTATATGTCATTGGTCTTCCCTATTGGCTGTGTCCTTGGCTTCAAACCA

AtTT12 (1351) AGTCTTGGAGTTGCTGGGATCTGGTGGGGATGATTGCAGGAGTCATACTTCAAACCCTA  
 BnTT12A (1412) AGTCTTGGAGTTGCTGGTATCTGGTGGGAATGATTGCAGGAGTTATACTTCAAGCATT  
 BnTT12B (1400) AGTCTTGGAGTTGCTGGGATCTGGTGGGAATGATTGCAGGAGTCATACTTCAAACCATA  
 BrTT12 (1351) AGTCTTGGAGTTGCTGGGATCTGGTGGGAATGATTGCAGGAGTCATACTTCAAACCATA  
 BoTT12-1 (1428) AGTCTTGGAGTTGCTGGGATCTGGTGGGAATGATTGCAGGAGTCATACTTCAAACCATA  
 BoTT12-2 (1351) AGTCTTGGAGTTGCTGGGATCTGGTGGGAATGATTGCAGGAGTCATACTTCAAACCATA

AtTT12 (1411) ACTTTGATTGTTCTTACACTTAAACTAAATGGACTTCCGAGGTAGAAAATGCAGCTCAT  
 BnTT12A (1472) ACTTTGATTGTTCTTACACTTAGAACTAACTGGACTTCCGAGGTGAAAATGCAGCTCAT  
 BnTT12B (1460) ACTTTGATTGTTCTTACACTTAGAACTAACTGGACTTCCGAGGTGAAAATGCAGCTCAT  
 BrTT12 (1411) ACTTTGATTGTTCTTACACTTAGAACTAACTGGACTTCCGAGGTGAAAATGCAGCTCAT  
 BoTT12-1 (1488) ACTTTGATTGTTCTTACACTTAGAACTAACTGGACTTCCGAGGTGAAAATGCAGCTCAT  
 BoTT12-2 (1411) ACTTTGATTGTTCTTACACTTAGAACTAACTGGACTTCCGAGGTGAAAATGCAGCTCAT

AtTT12 (1471) AGAGTAAAGACTTCCGCAACTGAGAAATCAAGAGATGGCTAACCGAGGTGTTTAA-----  
 BnTT12A (1532) AGGTGAAAGCTTCAGCAAATGAGAGTCAAGAGATGGCTACCGAAGGAGTCTAGAAATAA  
 BnTT12B (1520) AGGTGAAAGCTTCCGCAAAATGAGAGTCAAGAGATGGCTACCGAAGGAGTCTA-AAATAA  
 BrTT12 (1471) AGGTGAAAGCTTCAGCAAATGAGAGTCAAGAGATGGCCACCGAAGGAGTTTAA-----  
 BoTT12-1 (1548) AGGTGAAAGCTTCCGCAAAATGAGAGTCAAGAGATGGCTACCGAAGGAGTCTA-AAATAA  
 BoTT12-2 (1471) AGGTGAAAGCTTCCGCAAAATGAGAGTCAAGAGATGGCTACCGAAGGAGTCTA-A-----

AtTT12 (1525) -----  
 BnTT12A (1592) CAGCAACATCAACTATGTTATTTTCTCCTCTGTTTTGGTGGCAAGAGCTATGAAATAAT  
 BnTT12B (1579) CAGCAACATCAACTATGTTATTTTCTCCTCTGC-----AAAGCTATGAAATAAT  
 BrTT12 (1525) -----  
 BoTT12-1 (1607) CAGCAACATCAACTATGTTATTTTCTCCTCTGC-----AAAGCTATGAAATAAT  
 BoTT12-2 (1525) -----

AtTT12 (1525) -----  
 BnTT12A (1652) AATCTTTGTCCTTAGTATTTCAGTACAACATTTCTTTTGTTAATAATAATGGACAAAC  
 BnTT12B (1629) AATCTTTCGTCTCTTAGTATTTCAGTACAACAATTTCTTTTGTTAATAATAATGGACAAAC  
 BrTT12 (1525) -----  
 BoTT12-1 (1657) AATCTTTCGTCTCTTAGTATTTCAGTACAACAATTTCTTTTGTTAATAATAATGGACAAAC  
 BoTT12-2 (1525) -----

AtTT12 (1525) -----  
 BnTT12A (1712) TACAATGTCCCTTCTACAAAATCTTATTTTCGGCTTTAAAAAAAAAAAAAAAAAAAAA  
 BnTT12B (1689) TACAATAT-----AATATCTCTTCTACAAAAAAAAAAAAAAAAAAAAA-----



BrTT12 (1525) -----  
BoTT12-1 (1717) TACAATAT-----AATATCCTCTTCTACAAAAAAAAAAAAAAAAAAAAAAAA-----  
BoTT12-2 (1525) -----

10. BrTT10

AtTT10 (1) ATGTCACATTCCCTTCT-TCAATTTATTCTTAATCTCTCTTTTCCCTCTACAACAATTGCAT  
BrTT10-1 (1) ATGTCACATCCCTTGT-TCATTTACTTTCTAATCTCTCTTTTCCCTCTACAGAAGTTGCAC  
BrTT10-2 (1) ATGCCACATTCTTTCTCTCATT-CTTCTTAATCTCTCTTTTCCCTTTACACCAAATGTAT  
BoTT10 (1) ATGTCACATCCTTTGT-TCATTTACTTTCTAATCTCTCTTTTCCCTCTACAGTAGTTGCAC

AtTT10 (60) TGCGCATCACTATACATTACCGGTTAGGGAAGTCCATATACGAAACTGTGTAGCACGAA  
BrTT10-1 (60) TGCACATCGCCACACATTACCGGTTAAGGAAGTCCATATAAGAAACTGTGTAGCACGAA  
BrTT10-2 (60) TGCGCATCGCTACACTTTACCGGTTAAGGAAGTCCATATAACAAATTTGTGTAGTACGAA  
BoTT10 (60) TGCACATCGCTACACATTACCGGTTAAGGAAGTCCATATAAGAAACTGTGTAGCACGAA

AtTT10 (120) GCGGATTTAACCCTTAATAGTCAGTTTCTGGACCGATTATAAAGGTTACAAAAGGAGA  
BrTT10-1 (120) GAAGATTTAACCAGTTAATGGTCGGTTTCTGGACAACTTTAAAGGTTTACAAAAGGAGA  
BrTT10-2 (120) GAAGATTTCTGACCGTTAACTCTCAGTTTCTGGACCGATTTTAAAGGTTTACAAAAGGAGA  
BoTT10 (120) GAAGATTTAACCAGTTAATGGTCAGTTTCTGGACAACTCTAAAGGTTTACAAAAGGAGA

AtTT10 (180) CACTATTTATGTTAACGTTCAAACCGAGCTAGTGAAAAATCACAATGCATTGGCATGG  
BrTT10-1 (180) CACCATTTACGTTAACGTTCTGTAACCGAGCTAGTGAAAAATCACCATGCATTGGCATGG  
BrTT10-2 (180) CACCATTTACGTTAACGTTCTGTAACCGAGCTAGTGAAAAATCACAATGCATTGGCATGG  
BoTT10 (180) CACCATTTACGTTAACGTTCTGTAACCGAGCTAGTGAAAAATCACCATGCATTGGCATGG

AtTT10 (240) TGTAGAGCAGCCGAGAAATCCGTTGGTCAGATGGTCTGAATACATCACACAATGCCCGAT  
BrTT10-1 (240) TGTAGAGCAGCCGAGAAACCCATGGTCAGATGGACCAGAATACATCACACAATGCCCAAT  
BrTT10-2 (240) TGTAGAGCAGCCGGGAAACCCGTTGGTCAGATGGACCAGAATACATCACACAATGCCCGAT  
BoTT10 (240) TGTAGAGCAGCCGAGAAACCCATGGTCAGATGGACCAGAATACATCACACAATGCCCAAT

AtTT10 (300) TCGACCCGGGTCAGATTTTGTGTAACAAGTCATATTTCCATCGAAGACACGACTGTTTG  
BrTT10-1 (300) TCGACCTGGGTCGACTTTATTTATGAAGTCATATTTCCACCGAAGACGACTGTTTG  
BrTT10-2 (300) TCGACCCGGAAGTGATTTTATGTATGAAGTCATCTTTCCATCGAAGACGCAACTGTTTG  
BoTT10 (300) TCGACCTGGGTCGATTTTCATGTATGAAGTCATATTTCCACCGAAGACACGACTGTTTG

AtTT10 (360) GTGGCAGCGCATAGCTCTTGGACACGTGCAACTGTACACGGTCTTATTTTGTATATCC  
BrTT10-1 (360) GTGGCATGCTCATAGCTCTTGGACCGGTGCCACTGTACACGGTCTTATTTTGTGTATCC  
BrTT10-2 (360) GTGGCATGCGCATAGCTCTTGGACACGAGCCACTGTACATGGTCTTATATTCATATACCC  
BoTT10 (360) GTGGCATGCTCATAGCTCTTGGACCGGTGCTACCGTACACGGTCTTATTTTGTGTATCC

AtTT10 (420) TCGCCCCCGCAAATCCTCCCTTTTCCAAAAGGCAGACCATGAAGTCCCATATAATTTGGG  
BrTT10-1 (420) TCGCCCCCGAAATCCTCCCTTTTCCAAAATCGGATCACGAAGTCCCTTTGATTTTGG  
BrTT10-2 (420) TCGCCCCGGGACATTCCTCCCTTTTCCAAAAGCCGACACGAAATCCCTTAGTCTTGG  
BoTT10 (420) TCGCCCCCGAAATCCTCCCTTTTCCAAAAGCTGATCATGAAGTCCCTTTGATTTTGG

AtTT10 (480) TGAGTGGTGAAGAGGATGTGAGAGAGGTCTGTTGAGGAGTTCGTAAGGACAGGAGGGC  
BrTT10-1 (480) AGAGTGGTGAAGAAGGATGTGAGAGAAAGTAGTGGAGCTGTTTCATGAGGACAGGAGGTGA  
BrTT10-2 (480) AGAGTGGTGAAGGAAGATGTGAGAGAGGTAGTAGAGCAGTTCATAAGGACCGGAGCTGA  
BoTT10 (480) AGAGTGGTGAAGAAGGATGTGAGGGAAGTAGTGGAACTGTTTCAGTGGACAGGAGGTGA

AtTT10 (540) TCCTAATGTGTCCGATGCTTTGACCATCAATGGACATCCTGGTTTCTTGTATCCTTGCTC  
BrTT10-1 (540) CCCAAATGTGTCCGATGCTTTGACCATCAATGGACATCCTGGTTTCTTGTATCCTTGCTC  
BrTT10-2 (540) TCCTAATGTGTCCGATGCTTTGACTATCAATGGACATCCTGGTTTCTTGTATCCTTGCTC  
BoTT10 (540) CCCAAATGTGTCCGATGCTTTGACCATCAATGGACATCCTGGTTTCTTGTATCCTTGCTC

AtTT10 (600) TAAATCAGATACATTTTCATCTCACGGTAGAGAAGGGGAAAACCTACCGCATTCCGATGGT  
BrTT10-1 (600) TAAATCAGATACATTTCAAGCTCATGGTGGAGAAAAGCAAACCTATCGCATTCCGATGGT  
BrTT10-2 (600) TAAATCAGATACATTTTCGAGCTCACGGTAGAGAAGGGCAAACCTATCGCATTCCGATGGT  
BoTT10 (600) TAAATCAGATACATTTTCGAGTTCATGGTGGAGAAAAGCAAACCTATCGCATTCCGATGGT

AtTT10 (660) AAATGCCGCAATGAACCTACCTCTCTTTTTCGCAATCGGAAACCACAGCCTCACCGTAGT  
BrTT10-1 (660) AAACGCCGCACTGAACCTAATCTCTTCTTTCGCAATCGGAAACACAACTCACCGTAGT  
BrTT10-2 (660) AAACGCCGCGATGAACCTAATCTCTTCTTCTCAATCGGAAACACAGCCTCACCGTAGT

BoTT10 (660) AAACGCCGAATGAACCTTAATCCTCTTCTTCGCAATCGCAAAACACAAT**CTCACCGTGGT**  
 AtTT10 (720) CTCGGCCGATGGACACTACATCAAACCTATAAAAGGCTACTTATATCCTACTATATCCCCTGG  
 BrTT10-1 (720) TTCCGCGATGGCCACTACACCAAACCAATAAACGCTACTTACATCACCATATCTCCAGG  
 BrTT10-2 (720) **TGCCGCCGATGG**ACACTACACCAAACCTCTAAACGCTACTTACATCACCATATCTCCAGG  
 BoTT10 (720) **TGCCGCCGATGG**CCACTACACCAAACCAATAAACGCTACTTACATCACCATCTCTCCAGG  
 AtTT10 (780) CGAAAGACTAGACATGTTATTACACGCTGACCAAGACCCCGAACGCACTTATTACATGGC  
 BrTT10-1 (780) CCAAACGCTAGACTTGTATTACACGCGGACCAAAACCCAAAAAGCACTTATTACATGGC  
 BrTT10-2 (780) TCAAACGCTGGACGCTTATTACACGCGGACCAAAACCCAAAAAGCACTTATTACATGGC  
 BoTT10 (780) CCAAACGCTAGACTTGTATTACACGCGGACCAAAATCCAAAAAGCACTTATTACATGGC  
 AtTT10 (840) TGCCAGAGCTTACCAAAGCGG---AAATATCGATTTCAACAACCTCCACTACCATAGGAAT  
 BrTT10-1 (840) CGCCAGAGCTTACCATAGCAACCCCTAACATCAACTTCAACAACCTCCACAACCTATAGGGAT  
 BrTT10-2 (840) AGCCAGAGCTTACCAAGCAGCCCGGTCATCAGATTTCAACAACCTCCACAACCTATCGGGAT  
 BoTT10 (840) CGCAAGAGCTTACCATAGCAACCTTAACATCAGCTTCAACAACCTCCACAACCTATCGGGAT  
 AtTT10 (897) CTTAAGTTACACCTCTTCATGCAAAGCTAAAACATCATCGTTTTTTCAGGATATTACCCAAC  
 BrTT10-1 (900) CTTACGTTACACCTCTTCAACT----TCA-----TCGTCTTCAAAACACTACCCAAA  
 BrTT10-2 (900) CTTACGTTACATCTCTTCAAGCAACGCCAAA-----CGTCATC-----TTATCCAAG  
 BoTT10 (900) CTTATGTTACAACCTCTCAAGTAAAACCAAACGTCGTCTGTCTTCAAAACGTTACCCAAA  
 AtTT10 (957) CCTTCCTTTTTTACAATGACACCTCAGCAGCTTTTGGATTCTTTACCAAGATCAAATGCTT  
 BrTT10-1 (948) CCTTCCTTATTACAAATGACACATCAGCAGCTTTAGATTCTTACCAGTATCAAATGCTT  
 BrTT10-2 (948) CCTTCCTAATTATAATGACACGTCAGCAGCTTTCGGATTCTTTACGAACATCAAAGCTT  
 BoTT10 (960) CCTTCCTTATTACAACGACAGCTCAGCAGCTTTCGCATTCTTTACCAACATCACAAGCTT  
 AtTT10 (1017) ATTCCTCCGGTCAAGTTCCTGTCCAAATCTCTCGTAGGATAATCACGACGGTTTCAATAAA  
 BrTT10-1 (1008) ATACTCCGGACAAGTTCCTCGTGAAGATCTCACGTAGAATAATCTCGACGGTTTCAATAAA  
 BrTT10-2 (1008) ATACTCCGGACAAGTTCGAGTCAAATCTCACGTAGAATAATCTCAACGGTTTCACTAAA  
 BoTT10 (1020) ATACTCCGGACAAGTTCCTCGTCAAGATCTCACGTAGAATAATCTCGACGGTTTCAATAAA  
 AtTT10 (1077) TCTTCGCATGTGTCCCTCAAACCTCGTGCGAAGGTCCAAATGGGTCGAGATTAGCAGCG--  
 BrTT10-1 (1068) CAACCTTATGTGTCCCAACACTTGTGTGAAGGTCCAAACGGGTCGAGACTAGCGGCG--  
 BrTT10-2 (1068) TCTTCGATGTGTCCCTAAACACTCGTGCCAAAGGTCCAAACGGGTTGAGATCAGTGCGCGA  
 BoTT10 (1080) CTTTCGATGTGTCCCTAAACACTCGTGGAAGGTCCAAACGGATCGAGACTAGCGGCG--  
 AtTT10 (1135) -----AGTATGAACAACATATCGTTTTGTCACACCAAGTCACGTGGACATACT  
 BrTT10-1 (1126) -----AGTATGAACAACATATCGTTTCGTTACACCAAGTCACGTGGACATACT  
 BrTT10-2 (1128) GGTAGAGGCGGCTAGTATGAACAACATATCATTCTGTCACACCAAACCGTAGACATACT  
 BoTT10 (1138) -----AGCATGAACAACATATCGTTTCGTTACACCGAGTCACGTGGACATACT  
 AtTT10 (1182) AAAAGCTTATTACTATCACATTAAGGGCTTTATGGAACGCGGTTTCCGGAGTTTCCACC  
 BrTT10-1 (1173) AAAAGCTTACTATATCACATTAAGGGCGTTTACGGAACGCGGTTTCCGGAGTTTCCACC  
 BrTT10-2 (1188) AAAAGCTTATTACCTTACATTAAGGGCGTTTACGGAACGCGGTTTCCCTGCGTTTCCGCC  
 BoTT10 (1185) AAAAGCTTACTATATCACATTAAGGGAGTTTACGGAACGCGGTTTCCAGAGTTTCCACC  
 AtTT10 (1242) GTTGATTTTTAATTTACCGCAGAAAATCAGCCATTGTTTTTGGAAACTCCGAGACTCGC  
 BrTT10-1 (1233) GCTGGTTTTCAACTTTACCGCGGATGATCAACCGTTGTTTTTGCAGACTCCAAGATTTGC  
 BrTT10-2 (1248) TCTGGTTTTCAACTTTACCGCGGATGATCAACCGTTGATTTTTGCAGACTTCGAGACTTGC  
 BoTT10 (1245) GCTCGTTTTCAACTTTACCGCGGATGATCAACCGTTGTTTTTGCAGACTCCAAGACTTGC  
 AtTT10 (1302) AACCGAGGTAAAGGTGATTGAGTTCGGTCAAGTGGTTGAGCTTGTTATTCAAGGGACTAG  
 BrTT10-1 (1293) TACGGAGGTGAAAATACTGAAGTTTGGGAAAGTGTGAGATTGTTCTCAAGGGACGAG  
 BrTT10-2 (1308) TACGGAAGTAAAGATGATTAAGTACGGAGAAAGCGTTTGAACCGTTTTTCAAGGGACGAG  
 BoTT10 (1305) TACGGAGGTGAAAATACTTAAGTTTGGGAAAGTGTGAGATTGTTCTCAAGGGACGAG  
 AtTT10 (1362) TTTGGTTGGTGGTGGACTCGATCATCCTATGCATCTCCATGGTTTTAGCTTCTATGTGGT  
 BrTT10-1 (1353) TTTAGTTGGTGGTGGAAATCGATCATCCCATGCATCTCCATGGTTTTAGTTTCTACGAGGT  
 BrTT10-2 (1368) TTTAGTTGGTGGTGGAAATCGACCACCCATGCATTTGCATGGTTTTAGCTTCTATATTGT  
 BoTT10 (1365) TTTAGTTGGTGGTGGAAATCGATCATCCCATGCATCTCCATGGTTTTAGTTTCTACATGGT  
 AtTT10 (1422) TGGAGTAGGGTTCGGGAACATAACATAAGTGAAGAAGATCCGTCGTCGAGATATAATCT

BrTT10-1 (1413) TGGTGTTCGGGTTTGGTAACATAACGTAACGAAGA---TCCGTCG---AACTATAATCT  
 BrTT10-2 (1428) TGGTTTTGGGTTTGGTAACATAACGTAACGAAAGA---TCCGTCGTCGAACATAATCT  
 BoTT10 (1425) TGGTGTTCGGGTTTGGTAACATAACGTAACGAAGC---TCCGTCG---AACTATAACCT  
  
 AtTT10 (1482) CTACGATCCACCGTATAAAAATACAATGACCGTGCCTAGGAATGGTTGGATCGCTATCAG  
 BrTT10-1 (1467) CAAAGATCCTCCGTACATAAAACACTGCGACTGTGCCAAGAAACGGTTGGGTCGCTATCAG  
 BrTT10-2 (1485) CAAAGATCCTCCGTATAGAAATACGGCGACTGTGCCAAGAAACGGTTGGATCGCTATCAG  
 BoTT10 (1479) CAAAGATCCTCCGTACAAAATACTGCGACTGTGCCAAGAAACGGTTGGGTCGCTATCAG  
  
 AtTT10 (1542) ATTCGTAGCTGATAATCCCGGGTTTGGTTCATGCACTGTCACTTGGATAGACATCAAAC  
 BrTT10-1 (1527) ATTCATAGCTGATAATCCTCGGGTATGGTTCATGCACTGCCACTTTGATAGACATCTCAC  
 BrTT10-2 (1545) ATTCATAGCTAACAATCCTCGGGTTTGGTTCATGCACTGTCACTTGGATAGACATCTCAC  
 BoTT10 (1539) ATTCATAGCTGACAATCCTCGGGTATGGTTCATGCACTGCCACTTTGATAGACATCTCAC  
  
 AtTT10 (1602) GTGGGGTATGAATGTTGTGTTTCATTGTTAAGAATGGTAGAGAGCCAAATCAGCAGATTCT  
 BrTT10-1 (1587) GTGGGGAATGAAAGTTGTCTTCATTGTTCATGAATGGAAGAGGACTAAACCCAGCAGATTCT  
 BrTT10-2 (1605) GTGGGGTATGAACGTTGTCTTCATTGTTCGAGAACGGCAGAGGAATAAACCCAGCAGATTCT  
 BoTT10 (1599) GTGGGGAATGAAAGTTGTCTTCATTGTCAAGAATGGAAGAGGACTAAACCCAGCAGATTCT  
  
 AtTT10 (1662) GCCTCCACCAGATGATTTGCCGCCTTGCTATGAATAA  
 BrTT10-1 (1647) GCCTCCACCTCCTAACTTGCCCTCCTTGTTACTAA---  
 BrTT10-2 (1665) GCCTCCACCGCCTGACTTGCCGCCTTGTTACTAA---  
 BoTT10 (1659) GCCTCCACCTCCTGACTTGCCCTCCTTGTTACTAA---

1681

1717

## 11. BnUGT2

AtUGT72B1 (1) ATGGAGGAATCCAAAACACCTCACGTTGCGATCATAACCAAGTCCGGAATGGGTCATCTC  
 BnUGT2 (1) ATGGAGGAATCAAAAAGCGCCTCACGTTGCGATCATTCCGAGTCTTGAATGGGTCACCTC  
 BrUGT2-1 (1) -----  
 BrUGT2-2 (1) ATGGAGGAATCAAAAAGCGCCTCACGTTGCGATGATACCGAGTCCGGAATGGGCCACCTC  
 BrUGT2-4 (1) ATGGAAGAATCAAAAAGCGCCTCACGTTGCGATCATAACCGAGTCCAGGAATGGGTCACCTC  
 BrUGT2-3 (1) ATGGAGGAATCAAAAAGTGCCTCACGTTGCGATCATTCCGAGTCCGGAATGGGTCACCTC  
 BoUGT2-1 (1) ATGGAGGAATCAAAAAGCACCTCACGTCGCCATCCTCCGAGTCCGGAATGGGTCACCTC  
 BoUGT2-2 (1) ATGGAGGAATCAAAAAGCGCCTCACGTTGCGATCATAACCGAGTCCAGGAATGGGTCACCTC  
 BoUGT2-3 (1) ATGGAGGAATCAAAAAGCGCCTCACGTTGCGATGATACCGAGTCCGGAATGGGCCACCTC  
 BoUGT2-4 (1) ATGGAGGAATCAAAAAGCGCCTCACGTTGCGATCATTCCGAGTCCGGAATGGGTCACCTC  
  
 AtUGT72B1 (61) ATCCACTCGTCGAGTTTGCTAAACGACTCGTCCATCTTCACGGCCTCACCGTTACCTTC  
 BnUGT2 (61) ATCCACTCGTGCAGTTTGCTAAACGACTCGTTCACCGCCACGGCGTAACCATAACCTTT  
 BrUGT2-1 (1) -----  
 BrUGT2-2 (61) ATCCATTCGTCGAGTTAGCTAAACGACTCGTCCACAACCATGGCTTCACCGTAACCTTC  
 BrUGT2-4 (61) ATCCACTCGTGCAGTTTCGCTAAACGACTCGTTCACCGCCACGGCTTCTCCGTAACCTTC  
 BrUGT2-3 (61) ATCCACTCGTGCAGTTTGCTAAACGACTCGTTCACCGCCACGGCGTAACCATAACCTTT  
 BoUGT2-1 (61) ATCCACTCGCCAGTTTCGCTAAACAACCTCGTTCACTACCACGCCTTCTCCGTAACCTTT  
 BoUGT2-2 (61) ATCCACTCGTCCAGTTTCGCTAAACGACTCGTTCACCGCCACGGCTTCTCCGTAACCTTC  
 BoUGT2-3 (61) ATCCATTCGTTGAGTTAGCTAAACGACTCGTCCACAACCATGGCTTCACCGTAACCTTC  
 BoUGT2-4 (61) ATCCACTCGTCCAGTTTGCTAAACGACTCGTTCACCGCCACGGCGTAACCATAACCTTT  
  
 AtUGT72B1 (121) GTCATCGCCGGCGAAGGTCCACCATCAAAAAGCTCAGAGAACCGTCTCGACTCTCTCCCT  
 BnUGT2 (121) GTCGTCGTCGGCGATGGTCCACCACAAAAGCTCAGAGAACTGTCTTACTCTCTCTCT  
 BrUGT2-1 (1) -----  
 BrUGT2-2 (121) GTCGTCGTCGGCGAAGGTCCACCCTCAAAAAGCTCAGAGAACCGTCTCGACTCTCTCCCT  
 BrUGT2-4 (121) ATCGTCGTCGGCGAAGGTCCACCCTCAAAAAGCTCAGAGAACCGTCTTACTCTCTCTCT  
 BrUGT2-3 (121) GTCGTCGTCGGCGATGGTCCACCACAAAAGCTCAGAGAACTGTCTTACTCTCTCTCT  
 BoUGT2-1 (121) CTCGTCATCGGCGAAGGTCCACCCTCAAAAATCTCAAAGAAGTGTACTAAACTCTCTCCCG  
 BoUGT2-2 (121) ATCGTCGTCGGCGAAGGTCCACCCTCAAAAAGCTCAAAGAACCGTCTCGACTCTCTCCCT  
 BoUGT2-3 (121) GTCGTAGTTGGCGAAGGTCCACCCTCAAAAAGCTCAGAGAACCGTCTCGACTCTCTCCCT  
 BoUGT2-4 (121) GTCGTCGTCGGCGATGGTCCACCACAAAAGCTCAGAGAACTGTCTTACTCTCTCTCT  
  
 AtUGT72B1 (181) TCTTCAATCTCCTCCGTCTTTCTCCCTCCTGTTGATCTCACCGATCTCTCTTCGTCCT  
 BnUGT2 (181) CCTTCTATATCCTCCGTCTTCTCGTCTCCGCGACCTCACCGACTCCTCCTCCGACAACT  
 BrUGT2-1 (1) -----  
 BrUGT2-2 (181) TCTTCAATCTCCTCCGTCTTTCTCCCTCCACCAGTCTTACCGATATCCCGTCAACGGCT  
 BrUGT2-4 (181) TCTTCTTCTCCTCCGTATTTCTCCCTCCCGCTGACTCACCGACTCCTCCTCCGACGGCT

BrUGT2-3 (181) CCTTCTATATCCTCCGTCTTCCCTCGCTCCCGCCGACCTCACCGACCTCCCTCCGACAAC  
 BoUGT2-1 (181) TCGTCCATCTCCTCCGTCTTTCTCCCTCCCGCCGACCTCACCGACCTTCCACCCACCACT  
 BoUGT2-2 (181) TCCTCCTTCTCCTCCGTATTTCTCCCTCCCCTGACCTCACCGACCTCCCTCCGACGGCT  
 BoUGT2-3 (181) TCTTCAATCTCCTCCGTCTTTCTCCCTCCCACCATCTTACCATATACAGTCAACGGCT  
 BoUGT2-4 (181) CCTTCTATATCCTCCGTCTTCCCTCCCTCCCGCCGACCTCACCGAACCTCCCTCCGACAAC  
  
 AtUGT72B1 (241) CGCATCGAATCTCGGATCTCCCTCACCGTGACTCGTTCAAACCCGGAGCTCCGGAAAAGTC  
 BnUGT2 (241) CGCATCGAAACTCGGATCTCCCTCACCGTGACTCGTTCAAACCCGGAGCTCCGGCGAGTC  
 BrUGT2-1 (1) -----  
 BrUGT2-2 (241) CGCATTGCAACTCGCATTTCTCTCACCGTGACCCGTTCAAACCCGGAGCTCCGTAAAAGTC  
 BrUGT2-4 (241) CGCATCGAGACTCGCATCTCCCTCACCGTGAGCCGTTCAAACCCGGAGCTCCGGCGAGTC  
 BrUGT2-3 (241) CGCATCGAAACTCGGATCTCCCTCACCGTGACTCGTTCAAACCCGGAGCTCCGGCGAGTC  
 BoUGT2-1 (241) CGCATCGAAACTCGTATATCCCTCACCGTGAGTCGTTCAAACCCGGAGCTCCGGCGAGTC  
 BoUGT2-2 (241) CGCATCGAGACTCGCATCTCCCTCACCGTGAGCCGTTCAAACCCGGAGCTCCGGCGAGTC  
 BoUGT2-3 (241) CGCATTGCAACTCGCATTTCTCTCACCGTGACCCGTTCAAACCCGGAGCTCCGTAAAAGTC  
 BoUGT2-4 (241) CGCATCGAAACTCGGATCTCCCTCACCGTGACTCGTTCAAACCCGGAGCTCCGGCGAGTC  
  
 AtUGT72B1 (301) TTCGACTCGTTTCGTTGGAGGGAGGTCGTTTGCCAACGGCGCTCGTCGTCGATCTCTTCGGT  
 BnUGT2 (301) TTTGACTCGTTTCGCGCGGAAGGTCGTTTGCCGACAGCGCTATTTGTCGACCTTTTTCGGC  
 BrUGT2-1 (1) -----  
 BrUGT2-2 (301) TTCAACTCTTTCACGGCGGATGGTCGTTTGCCGACGGCGCTCATCGTCGATTTGTTTGGA  
 BrUGT2-4 (301) TTCGAGACGTTTCGCGCGGAGGGGCGTTTGCCGACCGTGCTCGTCGTCGATCTTTTTCGGT  
 BrUGT2-3 (301) TTTGACTCGTTTCGCGCGGAAGGTCGTTTGCCGACAGCGCTATTTGTCGACCTTTTTCGGC  
 BoUGT2-1 (301) TTTGACTCGTTTCGCGCGGAAGGTCGTTTGCCGACCGTGCTCGTCGTCGATCTTTTTCGGT  
 BoUGT2-2 (301) TTCGAGACGTTTCGCGCGGAGGGGCGTTTGCCGACCGTGCTCGTCGTCGATCTTTTTCGGT  
 BoUGT2-3 (301) TTCAGCTCTTTCACGGCGGATGGTCGTTTTCGCGACGGCGCTCATCGTCGATTTGTTTGGA  
 BoUGT2-4 (301) TTTGACTCGTTTCGCGCGGAAGGTCGTTTGCCGACAGCGCTATTTGTCGACCTTTTTCGGC  
  
 AtUGT72B1 (361) ACGGACGCTTTCGACGTGGCCGTAGAATTTACAGTGCCACCGTATATTTTCTACCCAACA  
 BnUGT2 (361) ACGGACGCTTTCGACGTGCGCCGCCGAGTTCAACGTGTTGCCGTATATTTTCTTCCCGACA  
 BrUGT2-1 (1) -----  
 BrUGT2-2 (361) ACGGATGCTTTCGACGTGCGCCTCAGAGTTTCAAGTGTACCGTATCTTTTCTACCCATCA  
 BrUGT2-4 (361) ACGGACGCTTTCGACGTAGCCAAGGAGTTCCACGTGTCGCTTATATTTTCTTCCATCA  
 BrUGT2-3 (361) ACGGACGCTTTCGACGTGCGCCGCCGAGTTCAACGTGTTGCCGTATATTTTCTTCCCGACA  
 BoUGT2-1 (361) ACGGATGCTTTCGACGTGCGCCGTGGAGTTCCACGTGTCGCCGTACATTTTCTTCCATCA  
 BoUGT2-2 (361) ACGGCCGCTTTCGACGTAGCCGTGGAGTTCCACGTGTCGCTTATATTTTCTTCCATCA  
 BoUGT2-3 (361) ACGGATGCTTTCGACGTGCGCCTCTGAGTTTCAAGTGTACCGTATCTTTTCTACCCATCA  
 BoUGT2-4 (361) ACGGACGCTTTCGACGTGCGCCGCCGAGTTCAACGTGTTGCCGTATATTTTCTTCCCGACA  
  
 AtUGT72B1 (421) ACGGCCAACGTCTTGTGCTTTTTTCTCCATTTGCCTAAACTAGACGAAACGGTGTGCTGT  
 BnUGT2 (421) ACGGCCAACGTCTTGTGCTTTTTTCTTCACTTCCCTAAACTTAATGAAACGATGTCGCTGT  
 BrUGT2-1 (1) -----ATGTCGCTGT  
 BrUGT2-2 (421) ACGGCCAACGTCTTGTGCTTTTTTCTAAATTTGCCTAAACTTGACGAAACGGTGTGCTGT  
 BrUGT2-4 (421) ACGGCCAACGTCTTGTGCTTTTTTCTCAATTTCCCTAAACTCGCCGAAACGATGTCGCTGT  
 BrUGT2-3 (421) ACGGCCAACGTCTTGTGCTTTTTTCTCAATTTCCCTAAACTTAATGAAACGATGTCGCTGT  
 BoUGT2-1 (421) ACGGCCAACGTCTTGTGCTTTTTTCTCCATCTTCCCTAAACTTGACGAAACGATGTCGCTGT  
 BoUGT2-2 (421) ACGGCCAACGTCTTGTGCTTTTTTCTCAATTTCCCTAAACTCGCCGAAACGATGTCGCTGT  
 BoUGT2-3 (421) ATGGCCAACGTCTTGTGCTTTTTTCTCAATTTGCCTAAACTTGACGAAACGGTGTGCTGT  
 BoUGT2-4 (421) ACGGCCAACGTCTTGTGCTTTTTTCTTCAATTTCCCTAAACTTAATGAAACGATGTCGCTGT  
  
 AtUGT72B1 (481) GAGTTTACGGGAATTAACCGAACCGTTATGCTTCCCTGGATGTGTACCGGTTGCCGGGAAA  
 BnUGT2 (481) CCTTTCAGCGAATTAACCGAACCGTTAATCTCCCAGGATGTGTACCGGTTCCGGGAAA  
 BrUGT2-1 (10) GAGGTTAGTGAGTTAACCGAACCGGTTAAGCTTCCCTGGATGTGTACCGGTTCCGGGAAA  
 BrUGT2-2 (481) GAGTTTACGGGAATTAACCGAACCGGTTAAGCTTCCCTGGATGTGTACCGGTTTGGTAAA  
 BrUGT2-4 (481) GACTTTGGTGAGTTAACCGAACCGGTTAAGGTCACCGGTTGTGTACCGGTTGTCTGGAAAA  
 BrUGT2-3 (481) CCTTTCAGCGAATTAACCGAACCGTTAATCTCCCAGGATGTGTACCGGTTCCGGGAAA  
 BoUGT2-1 (481) GAGTTTAGTGAGTTAACCGAACCGGTTAAGCTTCCCTGGATGTGTACCGGTTCCGGGAAA  
 BoUGT2-2 (481) GACTTTGGTGAGTTAACCGAACCGGTTAAGGTCACCGGTTGTGTACCGGTTGTCTGGAAAA  
 BoUGT2-3 (481) GAGTTTACGGGAATTAACCGAACCGGTTAAGCTTCCCTGGATGTGTACCGGTTTGGTAAA  
 BoUGT2-4 (481) CAATTCAGTGAATTAACCGAACCGTTAATCTCCCAGGATGTGTACCGGTTCCGGGAAA  
  
 AtUGT72B1 (541) GATTTCTTGGACCCGCCCAAGACCGGAAAGACGATGCATACAAATGGCTTCTCCATAAC  
 BnUGT2 (541) GATGTTCTTGATCCGGCTCAAGACCGGAAATGATGACCGGTACAAATGGCTTCTCCATAAC

BrUGT2-1 (70) GATGCTCCTGACCCGGCTAGAGATCGGAAACATGACGTGTACAAATGTCTTCTCCACAAC  
 BrUGT2-2 (541) GATTTCTCGAGACAGCTCAAGACCGGAAAAACGACGGATACAAATGGCTATTACACAAC  
 BrUGT2-4 (541) GATGTTCTTGACCCGGCTCAAGATCGGAAAAATGACCGGTACAAATGGCTTCTCCACAAC  
 BrUGT2-3 (541) GATGTTCTTGATCCGGCTCAAGACCGGAATGATGACCGGTACAAATGGCTTCTCCATAAC  
 BoUGT2-1 (541) GATGCTCCTGACCCGGCTAGAGATCGGAAACATGACGTGTACAAATGTCTTCTCCACAAT  
 BoUGT2-2 (541) GATGTTCTTGACCCGGCTCAAGATCGGAAAAATGACCGGTACAAATGGCTTCTCCACAAC  
 BoUGT2-3 (541) GATTTCTCGAGACAGCTCAAGACCGGAAAAACGACGGATACAAATGGCTATTACACAAC  
 BoUGT2-4 (541) GATGTTCTTGATCCGGCTCAAGACCGGAAAGATGACCGGTACAAATGGCTTCTCCATAAC  
  
 AtUGT72B1 (601) ACCAAGAGGTACAAAGAAGCCGAAGGTATTCTTGTGAATACCTTCTTTGAGCTAGAGCCA  
 BnUGT2 (601) ACCAAGAGGTACAAAGAAGCCGAAGGAATTCTTGTGAATACTTTCTCGAGCTGGAGCCA  
 BrUGT2-1 (130) GCCAAGAGGTACAAAGAAGCCGAAGGATTCTTGTTAATACTTTCTCGAGCTAGAGCCA  
 BrUGT2-2 (601) ACCAAGAGGTATAAAGAAGCCAAAGGATTCTTGTGAATACCTTTCGACGAGCTAGAGCCA  
 BrUGT2-4 (601) ACCAAGAGGTACAAAGAAGCAGAAGGATTCTTGTTAATAGTTTTCTCGAGCTAGAGCCT  
 BrUGT2-3 (601) ACCAAGAGGTACAAAGAAGCCGAAGGAATTCTTGTGAATACTTTCTCGAGCTGGAGCCA  
 BoUGT2-1 (601) GCCAAGAGGTACAAAGAAGCCGAAGGATTCTTGTTAATACTTTCTCGATCTAGAGCCA  
 BoUGT2-2 (601) ACCAAGAGGTACAAAGAAGCAGAAGGATTCTTGTTAATAGTTTTCTCGAGCTAGAGCCA  
 BoUGT2-3 (601) ACCAAGAGGTATAAAGAAGCCAAAGGATTCTTGTGAATACTTTTCGACGAGCTAGAGCCA  
 BoUGT2-4 (601) ACCAAGAGGTACAAAGAAGCCGAAGGAATTCTTGTGAATACTTTTCTCGAGCTGGAGCCA  
  
 AtUGT72B1 (661) AATGCTATAAAGGCCTTGCAAGAACCAGGTCTTGATAAACCACCGTATTATCCGGTTGGA  
 BnUGT2 (661) AATGCTATAAAGGCCTTGCAAGAACCAGGTCTTGATAAACCACCGTATTATCCAATTGGA  
 BrUGT2-1 (190) AATGCTTTAAAGGCCTTGCAAGAACCAGGTCTTGACAAACCACCGTATTATCCTATTGGA  
 BrUGT2-2 (661) AATGCTATAAAGGCCTTGCAAGAACCCTGGTCTTGATAAACCACCTGTTTATCCGGTTGGA  
 BrUGT2-4 (661) AATGCTATCAAGGCCTTGCAAGAACCAGGTTTAGATAAACCACCGTATTATCCGATCGGA  
 BrUGT2-3 (661) AATGCTATAAAGGCCTTGCAAGAACCAGGTCTTGATAAACCACCGTATTATCCAATTGGA  
 BoUGT2-1 (661) AATGCTTTAAAGGCCTTGCAAGAACCAGGTCTTGACAAACCACCGTATTATCCAATTGGA  
 BoUGT2-2 (661) AATGCTATCAAGGCCTTGCAAGAACCAGGTCTTGATAAACCACCGTATTATCCAATTGGA  
 BoUGT2-3 (661) GATGCTATAAAGGCCTTGCAAGAACCCTGGTCTTGATAAACCACCTGTTTATCCGGTTGGA  
 BoUGT2-4 (661) AATGCTATAAAGGCCTTGCAAGAACCAGGTCTTGATAAACCACCGTATTATCCAATTGGA  
  
 AtUGT72B1 (721) CCGTTGGTTAAACATTGGTAAGCAAGAGGCTAAGCA-----A-ACCGAAGA---GTCTGAA  
 BnUGT2 (721) CCATTGGTTAACGTTGGTAAGCAAGAGAGTAGTAA---CGGGATCGAAGAAGAGTCCGAA  
 BrUGT2-1 (250) CCGTTGGTTAA-----GCAAGAGAGTGGAAA---CGGGATAGAGGA---GTCCGAA  
 BrUGT2-2 (721) CCGTTGGTTAAACATTGGTAAGCGTAGGGTGACCA-----G-AGTGAAGA---GTCTGAA  
 BrUGT2-4 (721) CCGTTGGTTAAACATTGGTCAGCAAGAGGGTAGTAA---CGGGGTGGAAAA---GGCCGAG  
 BrUGT2-3 (721) CCATTGGTTAACGTTGGTAAGCAAGAGAGTAGTAA---CGGGATCGAAGAAGAGTCCGAA  
 BoUGT2-1 (721) CCGTTGGTTAA-----GCAAGAGGGTAGTAA---CGGGACCGAAGA---GTCTGAA  
 BoUGT2-2 (721) CCGTTGGTTAAACATTGGTCAGCAAGAGGGTGGTAA---CGGGGTGGAAAA---GGCCGAG  
 BoUGT2-3 (721) CCGTTGGTTAAACATTGGTAAGCGTAGGGTGACCA-----G-AGTGAAGA---GTCTGAA  
 BoUGT2-4 (721) CCGTTGGTTAACGTTGGTAAGCAAGAGAGTAGTAAGGACGGGATCGAAGAAGAGTCCGAA  
  
 AtUGT72B1 (772) TGTTTAAAGTGGTTGGATAACCAGCCGCTCGGTTCCGGTTTTATATGTGTCCTTTGGTAGT  
 BnUGT2 (778) TGTTTAAAGTGGTTAGATAACCAACCCTCGGTTCCGGTTTTGATGGGTCGTTTGGTAGT  
 BrUGT2-1 (295) TGTTTGAAGTGGTTGGACAAACAACCCTCGGTTCCGGTTTGGTATGTTTCAATTTGGGAGT  
 BrUGT2-2 (772) TGCTTAAAGTGGTTGGACAACCAACCATTCCGGTTCCGGTTTTGTATGTGTCCTTCCGGTAGT  
 BrUGT2-4 (775) TGTTTGAAGTGGTTGGATAACCAACCCTCGGTTCCGGTTTTGTATGTGTCATTTGGGAGT  
 BrUGT2-3 (778) TGTTTAAAGTGGTTAGATAACCAACCCTCGGTTCCGGTTTTGTATGTGTCGTTTGGTAGT  
 BoUGT2-1 (766) TGCTTGAAGTGGTTGGACAACAACCCTCGGTTCCGGTTTTGTATGTTTCAATTTGGGAGT  
 BoUGT2-2 (775) TGTTTGAAGTGGTTGGATAAACAACCCTCGGTTCCGGTTTTGTATGTGTCATTTGGGAGT  
 BoUGT2-3 (772) TGCTTAAAGTGGTTGGACAACAACCATTCCGGTTCCGGTTTTGTATGTGTCCTTCCGGTAGT  
 BoUGT2-4 (781) TGTTTAAACGTGGTTAGATAACCAACCCTCGGTTCCGGTTTTGTATGTGTCGTTTGGTAGT  
  
 AtUGT72B1 (832) GGCGGTACCCTCACATGTGAGCAGCTCAATGAGCTTGCTCTTGGTCTTGCAGATAGTGAG  
 BnUGT2 (838) GGTGGTGCACCTCACATGCGAGCAGTTTCGATGAGCTTGCTCATGGTCTTGCAGACAGCGAG  
 BrUGT2-1 (355) GGTGGTGTACTAACGCTTGAGCAGCTCAATGAGCTTGCTCTTGGTCTTGAAGACAGCAAA  
 BrUGT2-2 (832) GGCGGTACACTCTCATGTGAGCAGCTTAATGAGCTTGCTCTTGGTCTTGCAGATAGTAAG  
 BrUGT2-4 (835) GGTGGTGCACCTCACGCTTGAGCAGCAAAATGAGCTTGCTCTTGGTCTTGCAGACAGCGAG  
 BrUGT2-3 (838) GGTGGTGCACCTCACATGCGAGCAGTTTCGATGAGCTTGCTCATGGTCTTGCAGACAGCGAG  
 BoUGT2-1 (826) GGTGGTGTACTAACGCTTGAGCAGCTCAATGAGCTTGCTCTTGGTCTTGAAGACAGCAAG  
 BoUGT2-2 (835) GGTGGTGCACCTCACGCTTGAGCAGCAAAATGAGCTTGCTCTTGGTCTTGCAGACAGCGAG  
 BoUGT2-3 (832) GGCGGTACACTCTCATGCGAGCAGTTAATGAGCTTGCTCTTGGTCTTGCAGATAGTAAG  
 BoUGT2-4 (841) GGTGGTGCACCTCACATGCGAGCAGTTTCGATGAGCTTGCTCATGGTCTTGCAGACAGCGAG

AtUGT72B1 (892) CAACGGTTTCTTTGGGTCATACGAAGTCCTAGTGGGATCGCTAATTCTGTCGTATTTTGAT  
 BnUGT2 (898) CAACGGTTTCTTTGGGTCATA**CGGAGTCCAAGTCAAATAGCT**GATGCTTCGTTTTTCAAT  
 BrUGT2-1 (415) CAACGGTTTCTTTGGGTCATACGGAGCCCAAGTCAAACAGCAAATGCTTCGTTTTTGTAGA  
 BrUGT2-2 (892) CAACGGTTTCTTTGGGTCATACGAAGTCCGAGTGGGGTTGCTAAATCTTCGTATTTTGAT  
 BrUGT2-4 (895) CAACGGTTCCTTTGGGTCATACGTAGTCCGAGTCAAGTTGCTGACGCTTCGTTTTTCAAT  
 BrUGT2-3 (898) CAACGGTTTCTTTGGGTCATACGGAGTCCAAGTCAAATAGCTGATGCTTCGTTTTTCAAT  
 BoUGT2-1 (886) CAACGGTTTCTTTGGGTCATACGGAGCCCAAGTCAAACCGCAGATGCTTCGTTTTTGTAGA  
 BoUGT2-2 (895) CAACGGTTCCTTTGGGTCATACGTAGTCCGAGTCAAGTTGCTGATGCTTCGTTTTTCAAT  
 BoUGT2-3 (892) CAACGGTTTCTTTGGGTCATACGAAGTCCGAATGGGGTTGCTAATCTTCGTATTTTGAT  
 BoUGT2-4 (901) CAACGGTTTCTTTGGGTCATACGGAGTCCAAGTCAAATCGCTGATGCTTCGTTTTTCAAT

AtUGT72B1 (952) TCACATAGCCAAAACAGATCCATTGACATTTTTACCACCGGGATTTTTAGAGCGGACTAAA  
 BnUGT2 (958) CCGCATAGCCAAAACGATCCGTTAACATTTTTACCACCAGGATTTTTAGAACGGACTAAA  
 BrUGT2-1 (475) TCGCATAGTGAAGCCGACCCACTGACATTTTTGCCGCATGGTTTTCTTGGAACGGACTAAA  
 BrUGT2-2 (952) TCACATAGCCATACTGATCCATTAACTTTTTACCATCCGGATATTTAGCTCGCACCAAAA  
 BrUGT2-4 (955) TCACATAGCGAATCCGACCCGTTAAGCTATTTACCACCGGTTTTCTTGGAACGGACCAAC  
 BrUGT2-3 (958) CCGCATAGCCAAAACGATCCGTTAACATTTTTACCACCAGGATTTTTAGAACGGACTAAA  
 BoUGT2-1 (946) TCGCATAGCGAAGCCGACCCACTGACATTTTTGCCGCATGGTTTTCTTGGAACGGACTAAA  
 BoUGT2-2 (955) TCACACAGCGAATCCGACCCGTTAAGCTATTTACCACCGGTTTTCTTGGAACGGACCAAC  
 BoUGT2-3 (952) TCACATAGCCATACTGATCCATTAACTTTTTACCATCCGGATATTTGCTCGCACCAAAA  
 BoUGT2-4 (961) CCGCATAGCCAAAACGATCCGTTAACATTTTTACCACCAGGATTTTTAGAACGGACTAAA

AtUGT72B1 (1012) AAAAGAGGTTTTGTGATCCCTTTTTGGGCTCCACAAGCCCAAGTCTTGGCGCATCCATCC  
 BnUGT2 (1018) GGTAGAGGTTTTGTGATCCCTTCATGGGCTCCACAAGCCCAAATTTAGCACATCCATCT  
 BrUGT2-1 (535) GATAGAGGCTTTATGATCCCTTCATGGGCTCCACAAGCCCAAATTTAGCTCATCCGCTCT  
 BrUGT2-2 (1012) GACAGAGGTTTCGTGATCGCCTCTTGGGCTCCACAAGCCCAAATTTAGCCATTATCC  
 BrUGT2-4 (1015) GGCAGAGGTTTTATGATCCCTTCATGGGCTCCACAAGCCCAAATTTAGCTCATTCGTCT  
 BrUGT2-3 (1018) GGTAGAGGTTTTGTGATCCCTTCATGGGCTCCACAAGCCCAAATTTAGCACATCCATCT  
 BoUGT2-1 (1006) GATAGAGGCTTTATGATCCCTTCATGGGCTCCACAAGCCCAAGTCTTAGCTCATCCGCTCT  
 BoUGT2-2 (1015) GGCAGAGGCTTTATGATCCCTTCATGGGCTCCACAAGCCCAAATTTAGCTCATTCGTCT  
 BoUGT2-3 (1012) GACAGAGGTTTCGTGATCGCCTCTTGGGCTCCACAAGCCCAAATTTAGCCATTATCC  
 BoUGT2-4 (1021) GGTAGAGGTTTTGTGATCCCTTCATGGGCTCCACAAGCCCAAATTTAGCACATCCATCT

AtUGT72B1 (1072) ACGGGAGGATTTTTAACTCATTGTGGATGGAATTCGACTCTAGAGAGTGTAGTAAGCGGT  
 BnUGT2 (1078) ACCGGAGGGTTTTTAACTCATTGTGGATGGAATTCGACTCTAGAAAAGTATAGTAAGTGGT  
 BrUGT2-1 (595) ACCGGAGGGTTTTTAACTCATTGTGGATGGAATTCGACTCTGAAAAGTATAGTAAGCGGT  
 BrUGT2-2 (1072) ACAGGAGGATTTCTTACTCATTGTGGATGGAATTCGACTCTAGAAAAGTATAGTAAGTGGT  
 BrUGT2-4 (1075) ACAGGAGGGTTTTTAACTCATTGTGGATGGAATTCGACTCTAGAGAGTATAGTAAGCGGT  
 BrUGT2-3 (1078) ACCGGAGGGTTTTTAACTCATTGTGGATGGAATTCGACTCTAGAAAAGTATAGTAAGTGGT  
 BoUGT2-1 (1066) ACCGGAGGGTTTTTAACTCATTGTGGATGGAATTCGACTCTGAAAAGTATAGTAAGCGGT  
 BoUGT2-2 (1075) ACAGGAGGGTTTTTAACTCATTGTGGATGGAATTCGACTCTAGAGAGTATAGTAAGCGGT  
 BoUGT2-3 (1072) ACAGGAGGATTTCTTACTCATTGTGGATGGAATTCGACTCTAGAAAAGTATAGTAAGTGGT  
 BoUGT2-4 (1081) ACCGGAGGGTTTTTAACTCATTGTGGATGGAATTCGACTCTAGAAAAGTATAGTAAGTGGT

AtUGT72B1 (1132) ATTCCACTTATAGCATGGCCATTATACGCCGAAACAGAGGATGAATGCGGTTTTGTTGAGT  
 BnUGT2 (1138) GTTCCACTCATAGCATGGCCATTATACGCCGAAACAGAGGATGAATGCGGTTTTGTTGGCA  
 BrUGT2-1 (655) GCTCCACTTATTGCTTGGCCATTGTACGCTGAGCAGAAGATGAACGCGTTTTGTTGGCC  
 BrUGT2-2 (1132) GTTCCACTTATTGCTTGGCCATTATACGCTGAGCAAAAATGAATGCGGTTTTGTTGACG  
 BrUGT2-4 (1135) GTTCCGCTCATTGCTTGGCCATTATACGCTGAGCAGAAGATGAATGCGGTTTCGTTGGCC  
 BrUGT2-3 (1138) GTTCCACTCATAGCATGGCCATTATACGCCGAAACAGAGGATGAATGCGGTTTTGTTGGCA  
 BoUGT2-1 (1126) GTTCCACTTATTGCTTGGCCATTGTACGCTGAGCAGAAGATGAACGCGTTTTGTTGGCC  
 BoUGT2-2 (1135) GTTCCGCTCATTGCTTGGCCATTATACGCCGAAACAGAGGATGAATGCGGTTTCGTTGGCC  
 BoUGT2-3 (1132) GTTCCACTTATTGCTTGGCCATTATACGCTGAGCAAAAATGAATGCGGTTTTGTTGACG  
 BoUGT2-4 (1141) GTTCCACTCATAGCATGGCCATTATACGCCGAAACAGAGGATGAATGCGGTTTTGTTGGCA

AtUGT72B1 (1192) GAAGATATTCGTGCGGCACTTAGGCCGCGTGCCGGGGACGATGGGTTAGTTAGAAGAGAA  
 BnUGT2 (1198) GAAGATATCCATGTTGCACTTAGGGCGCATGCAGGGGAGGATGGGATGGTGAAGAGAGAA  
 BrUGT2-1 (715) GAAGATATTCATGTTGCGCTTAGGGCTCATGCAGGGGAGGATGGGATGGTGAAGAGAGAA  
 BrUGT2-2 (1192) GAAGATATCCATGTTGCGCTTAGAGCCCGTGCAGGGGTTGATGGGCTGGTGAAGAGAGAA  
 BrUGT2-4 (1195) GAAGATATTCGAGTTGCGATCAGGGCTCGTGCCGGGGAGGATGGGTTGGTGAAGAGAGAA  
 BrUGT2-3 (1198) GAAGATATCCATGTTGCACTTAGGGCGCATGCAGGGGAGGATGGGATGGTGAAGAGAGAA  
 BoUGT2-1 (1186) GAAGATATTCATGTTGCGCTTAGGGCTCATGCAGGGGATGAAGGATGGTGAAGAGAGAA

BoUGT2-2 (1195) GAAGATATTTCGTGTTGCGATTAGAGCTCGTGCGGGGACGATGGGCTGGTGAGAAGAGAA  
 BoUGT2-3 (1192) GAAGATATCCATGTGCGCCTTAGAGCCCGTGCAGGGGTTGATGGGCTGGTGATGAGAGAA  
 BoUGT2-4 (1201) GAAGATATCCATGTTGCGCCTTAGGGCCATGCAGGGGAGGATGGGATGGTGAGACGAGAA  
  
 AtUGT72B1 (1252) GAGGTGGCTAGAGTGGTAAAAGGATTGATGGAAGGTGAAGAAGGCCAAAGGA-----  
 BnUGT2 (1258) GAGGTGGCTAGAGTGGTTAAGGGATTAATGGAAGGTGAAGAAGGCCAAAGGT-----  
 BrUGT2-1 (775) GAGGTAGCTAGAGTGGTTAAGGGATTAATGGAAGGTGAAGAAGGTAAAAGGT-----  
 BrUGT2-2 (1252) GAGGTGGCTAGAGTGGTGAAGGGATTAATGGAAGGTGAAGAAGGTAAAAGGAATGATGGAA  
 BrUGT2-4 (1255) GAGGTGGTTAGAGTGGTTAAGGGATTAATGGAAGGTGAAGAAGGTAAAATGT-----  
 BrUGT2-3 (1258) GAGGTGGCTAGAGTGGTTAAGGGATTAATGGAAGGTGAAGAAGGCCAAAGGT-----  
 BoUGT2-1 (1246) GAGGTAGCTAGAGTGGTTAAGGGATTAATGGAAGGTGAAGAAGGTAAAAGGT-----  
 BoUGT2-2 (1255) GAGGTGGTTAGAGTGGTTAAGGGATTAATGGAAGGTGAAGAAGGTAAAATGC-----  
 BoUGT2-3 (1252) GAGGTGGCTAGAGTGGTGAAGGGATTAATGGAAGGTGAAGAAGGTAAAAGGAATGATGGAA  
 BoUGT2-4 (1261) GAGGTGGCTAGAGTGGTTAAGGGATTAATGGAAGGTGAAGAAGGCCAAAGGT-----  
  
 AtUGT72B1 (1303) -----GTGAGGAACAAGATGAAGGAGTTGAAGGAAGCAGCTTGTAGG  
 BnUGT2 (1309) -----GTGAGGAACAAGATGAAGGAAATGAAGGAAGGAGCTAGTAGG  
 BrUGT2-1 (826) -----GTGAGGAATAAGATGAAGGAAATGAAGGAAGGAGCTAGCAGG  
 BrUGT2-2 (1312) GGTGATGAAGGTAAGAGAGTGAGGAATAAGATGACAAAATGAAGGAAGGAGCTTGTAGA  
 BrUGT2-4 (1306) -----GTGAGGAATAAGATGAAGGAAATGAAGGAAGGAGCTAGTAGG  
 BrUGT2-3 (1309) -----GTGAGGAACAAGATGAAGGAAATGAAGGAAGGAGCTAGTAGG  
 BoUGT2-1 (1297) -----GTGAGGAATAAGATGAAGGAAATGAAGGAAGGAGCTAGTAGG  
 BoUGT2-2 (1306) -----GTGAGGAATAAGATGAAGGAAATGAAGGAAGGAGCTAGTAGG  
 BoUGT2-3 (1312) GGTGATGAAGGTAAGAGAGTGAGGAATAAGATGACAAAATGAAGGAAGGAGCTTGTAGG  
 BoUGT2-4 (1312) -----GTGAGGAACAAGATGAAGGAAATGAAGGAAGGAGCTAGTAGG  
  
 AtUGT72B1 (1345) GTGTTGAAGGATGATGGGACTTCTACAAAAGCACTTAGTCTTGTGGCCTTAAAGTGGAAA  
 BnUGT2 (1351) GTGCTGAATGATACTGGGACTTCTACAAAAGCACTTAATCTTGTGACATTTAAGTGGAAA  
 BrUGT2-1 (868) GTGCTGAGTGATGATGGGTCTTCTACAAAAGCACTTAGTCTTGTGGCATTGAAGTGGAAA  
 BrUGT2-2 (1372) GTGATGAAGGATGATGGGTCAATTTACAAAAGGCTCTTAGTCAGTTAGTCTTGTAA-----  
 BrUGT2-4 (1348) GTGTTGAGTGATGATGGGTCTCTACAAAAGCACTTAGTCTTGTGACATTTAAGTGGAAA  
 BrUGT2-3 (1351) GTGCTGAATGATACTGGGACTTCTACAAAAGCACTTAATCTTGTGACATTTAAGTGGAAA  
 BoUGT2-1 (1339) GTGCTGAGTGATGATGGGTCTTCTACAAAAGCACTTAGTCTTGTGGCATTGAAGTGGAAA  
 BoUGT2-2 (1348) GTGTTGAGTGATGATGGGTCTCTACAAAAGCACTTAGTCTTGTGCGTTAAAGTGGAAA  
 BoUGT2-3 (1372) GTGATGAAGGATGATGGGTCAATTTACAAAAGGCTCTTAGTCAGTTAGTCTTGTAA-----  
 BoUGT2-4 (1354) GTGCTGAATGATAATGGGACTTCTACAAAAGCACTTAATCTTGTGACATTTAAGTGGAAA  
1441 1479
  
 AtUGT72B1 (1405) GCCCACAAAAAGAGTTAGAGCAAAATGGCAACCACTAA  
 BnUGT2 (1411) GCCCACAAAGAGAGCTAAAGCAAAATGGCAAGCATTGA  
 BrUGT2-1 (928) GACCACCAAAAAGGGTTAGAGCAAAATGGCAAGCACTGA  
 BrUGT2-2 (1426) -----  
 BrUGT2-4 (1408) GACCACCAAAAAGGGTTAGTGCAAAATGGCAAGCACTGA  
 BrUGT2-3 (1411) GCCCACAAAGAGAGCTAAAGCAAAATGGCAACCACTGA  
 BoUGT2-1 (1399) GACCACCAAAAAGGGTTAGAGCAAAATGGCAAGCACTGA  
 BoUGT2-2 (1408) GACCACCAAAAAGGGTTAGTGCAAAATGGCAAGCACTGA  
 BoUGT2-3 (1426) -----  
 BoUGT2-4 (1414) GCCCACAAAGAGAGCTAAAGCAAAATGGCAACCACTGA

## 12. BnTT8

AtTT8 (1) -----  
 BnTT8 (1) GAAAGTTGCACGATCTTACTCTTTCATTAGAGAGAGAGACAGAGGGGAGAGAGAGAGG  
 BrTT8-1 (1) -----  
 BrTT8-2 (1) -----  
 BoTT8 (1) -----  
  
 AtTT8 (1) -----  
 BnTT8 (61) GAGAGGGAGAGAGATAGAGATAGAGAGAGGGATAATACAGGTTTTTCATCTCGGGGAAA  
 BrTT8-1 (1) -----  
 BrTT8-2 (1) -----  
 BoTT8 (1) -----  
  
 AtTT8 (1) -ATGGATGAATCAAGTATTATTCCGGCAGAGAAAGTGCCGGAGCTGAGAAAAAGAGCT  
 BnTT8 (121) GATGGATGAATTAAGTATCATACCGTTATGAAAGTGATCGGGGCTGAGAAAGAAGAT

BrTT8-1 (1) -ATGGATGAATTAAGTATCATACCGTTATGGAAAGTGATCGGGGCTGAGAAAGAAGAGAT  
 BrTT8-2 (1) -ATGGATGAATTAAGTATTATACCGTTATGGAAAGTGATCGGGGCTGAGAAAGAAGAGAT  
 BoTT8 (1) -ATGGATGAATTAAGTATTATACCGTTATGGAAAGTGATCGGGGCTGAGAAAGAAGAGAT

AtTT8 (60) TCAAGGGCTGCTTAAGACCGCGGTTCAATCTGTGGACTGGACTTATAGTGTCTTCTGGCA  
 BnTT8 (181) TCAAGGGCTACTTAAGCGCGTGGTCAATCTGTGGGTGGACTTATAGTGTCTTCTGGCA  
 BrTT8-1 (60) TCAAGGGCTACTTAAGCGCGTGGTCAATCTGTGGGTGGACTTATAGTGTCTTCTGGCA  
 BrTT8-2 (60) TCAAGGGCTACTTAAGCGCGTGGTCAATCTGTGGGTGGACTTATAGTGTCTTCTGGCA  
 BoTT8 (60) TCAAGGGCTACTTAAGCGCGTGGTCAATCTGTGGGTGGACTTATAGTGTCTTCTGGCA

AtTT8 (120) ATTTTGTCTCAACAACGGGCTCTTGGTGTGGGGGAATGGATACTACAACGGTCAATAAA  
 BnTT8 (241) ACTTTGTCTCAACGAAGGAAATTGATGTGGAGTAGTGGATACTACAACGGCGCAATAAA  
 BrTT8-1 (120) ACTTTGTCTCAACGAAGGAAATTGATGTGGAGTAGTGGATACTACAACGGCGCAATAAA  
 BrTT8-2 (120) ACTTTGTCTCAACGAAGGAAATTGATGTGGAGTAGTGGATACTACAACGGCGCAATAAA  
 BoTT8 (120) ACTTTGTCTCAACTAAGGAAATTGATGTGGAGTAGTGGAACTATAACGGTCAATAAA

AtTT8 (180) GACGAGGAAGACAACCTCAACCAGCGGAGGTGACGGCAGAAGAGGGCGGTTAGAGAGGAG  
 BnTT8 (301) GACTAGAAAGACAACCTCAGCCGGCGGAAGTTACGGCTGAAGAGGCTGCGTCGGAGAGAAG  
 BrTT8-1 (180) GACTAGAAAGACAACCTCAGCCGGCGGAAGTTACGGCTGAAGAGGCTGCGTCGGAGAGAAG  
 BrTT8-2 (180) GACTAGAAAGACAACCTCAGCCGGCGGAAGTTACGGCTGAAGAGGCTGCGTCGGAGAGAAG  
 BoTT8 (180) GACTAGAAAGACAACCTCAGCCGGCGGAAGTTAAGGCTGAAGAGGCTGCGTCGGAAAGAAG

AtTT8 (240) CCAACAGCTCAGGGAGCTTTATGAGACACTTTTAGCCGGAGAGTCAACGTCAGAAGCAAG  
 BnTT8 (361) CCAACAGCTCATGGAGCTTTACGAGACGCTTTTGTGGAGAATCATCGATGGAAGCGAG  
 BrTT8-1 (240) CCAACAGCTCATGGAGCTTTACGAGACGCTTTTGTGGAGAATCATCGATGGAAGCGAG  
 BrTT8-2 (240) CCAACAGCTCATGGAGCTTTACGAGACGCTTTTGTGGAGAATCATCGATGGAAGCGAG  
 BoTT8 (240) CCAACAGCTCATGGAGCTTTACGAGACGCTTTTGTGGAGAATCATCGATGGAAGCGAG

AtTT8 (300) AGCATGCACCGCATTTGTCACCGGAGGATTTGACGGAGACAGAATGGTTTTATCTAATGTG  
 BnTT8 (421) GGCTTGCACAGCACTGTGCGCCGGAGGATTTGACGGATCCTGAATGGTTTTATGTGCTGTG  
 BrTT8-1 (300) GGCTTGCACAGCACTGTGCGCCGGAGGATTTGACGGATCCTGAATGGTTTTATGTGCTGTG  
 BrTT8-2 (300) GGCTTGCACAGCACTGTGCGCCGGAGGATTTGACAGATCCTGAATGGTTTTATGTGCTGTG  
 BoTT8 (300) GGCTTGCACAGCACTGTGCGCCGGAGGATTTGACGGATCCTGAATGGTTTTATGTGCTGTG

AtTT8 (360) CGTCTCTTTCTCTTTTCTCTCCTCCTCCATCTGGGATGCCAGGAAAAGCGTATGCAAGGAGGAA  
 BnTT8 (481) TTTCACTTACTCTTTTTCGAACCTCCTTCTGGGATGCCAGGAAAAGCGTATGCGAGGAGGAA  
 BrTT8-1 (360) TTTCACTTACTCTTTTTCGAACCTCCTTCTGGGATGCCAGGAAAAGCGTATGCGAGGAGGAA  
 BrTT8-2 (360) TTTCACTTACTCTTTTTCGAACCTCCTTCTGGGATGCCAGGAAAAGCGTATGCGAGGAGGAA  
 BoTT8 (360) TTTCACTTACTCTTTTTCGAACCTCCTTCTGGGATGCCAGGAAAAGCGTATGCGAGGAGGAA

AtTT8 (420) GCACGTATGGCTAAGTGGTGCAAATGAGGTTGACAGTAAAACCTTTTCTAGAGCTATTCT  
 BnTT8 (541) GCACATATGGCTAAGTGGTGCAAATGAGGTTGACAATAAAAATCTTCTCTAGGGCTATTTTC  
 BrTT8-1 (420) GCACATATGGCTAAGTGGTGCAAATGAGGTTGACAATAAAAATCTTCTCTAGGGCTATTTTC  
 BrTT8-2 (420) GCACATATGGCTACGTGGTGCAAATGAGGTTGACAATAAAAATCTTCTCTAGGGCTATTTTC  
 BoTT8 (420) TCACATATGGCTAAGTGGTGCAAATGAGGTTGACAATAAAAATCTTCTCTAGGGCTATTTTC

AtTT8 (480) CGCTAAGAGTGCTAAAATTTCAGACAGTGGTTTGCATTCGAATGCTTGTATGGTGTGTGGAA  
 BnTT8 (601) TGCAAAGAGTGCCAAATTCAGACAGTGGTTTGCATTCGCCGTGCTTGTATGGCGTTTTGGA  
 BrTT8-1 (480) TGCAAAGAGTGCCAAATTCAGACAGTGGTTTGCATTCGCCGTGCTTGTATGGCGTTTTGGA  
 BrTT8-2 (480) TGCAA-----G-----A--CAG-----TGGTTGCATTCGCCGTGCTTGTATGGCGTTTTGGA  
 BoTT8 (480) TGCAA-----G-----A--CAG-----TGGTTGCATTCGCCGTGCTTGTATGGCGTTTTGGA

AtTT8 (540) ACTAGGCACAACGAAAAAGGTAAGAGAAGATGTAGAGTTTGTGAGCTCACAAGAGTTT  
 BnTT8 (661) ACTAGGCACAACGAACAAGGTCAAAGAGAGTGAAGAGTTTGTGAGCACATAAAGAGTTT  
 BrTT8-1 (540) ACTAGGCACAACGAAAAAGGTAAGAGAAGATGTAGAGTTTGTGAGCTCACAAGAGTTT  
 BrTT8-2 (487) -----G-TCAAAGAGAGTGAAGAGTTTGTGAGCACATAAAGAGTTT  
 BoTT8 (525) ACTAGGCACAACGAAAAAGGTAAGAGAAGATGTAGAGTTTGTGAGCTCACAAGAGTTT

AtTT8 (600) CTTCTATGACCCTGCAAGACGAACCAAGCCGGCTCTTTCTGAACACTCCACTACGA  
 BnTT8 (721) CTTCCACAACCACCCGAAGTCAAACACTAAGCCTACTCTTTCTGAACACTTCATCAACGA  
 BrTT8-1 (600) CTTCCACAACCACCCGAAGTCAAACACTAAGCCTACTCTTTCTGAACACTTCATCAACGA  
 BrTT8-2 (528) CTTCCACAACCACCCGAAGTCAAACACTAAGCCTACTCTTTCTGAACACTTCATCAACGA  
 BoTT8 (585) CTTCCACAACACTACCCGAAGTCAAACACTAAGCCTACTCTTTCTGAACACTTCATCAACGA



AtTT8 (660) AGTGCATGAAGAAGCGAAGACGAAGAAGAAGTAGAAGAAGAGATGACAATGTCAGAGGA  
 BnTT8 (781) AGAGCATGAAGAAGACGAAGAAGAAGTAGAAGAAGAAGAA---ATGACAATGTCAGAAGA  
 BrTT8-1 (660) AGAGCATGAAGAAGACGAAGAAGAAGTAGAAGAAGAAGAA---ATGACAATGTCAGAAGA  
 BrTT8-2 (588) AGAGCACGAAGAAGACGAAGAAGAAGTAGAAGAAGAAGAA---ATGACAATGTCAGAAGA  
 BoTT8 (645) AGAGCATGAAGAAGACGAAGACGAAGTAGAAGAAGAAGAA---ATGACAATGTCAGAGGA

AtTT8 (720) AATGAGGCTTGGCTCTCCTGATGATGAAGATGTTTCCAATCAAAATCTACACTCTGATCT  
 BnTT8 (838) GATAAGACTTGGTTCTCCTGATGACGATGACGCTCCAATCAAAATCTACTCTCTGATTT  
 BrTT8-1 (717) GATAAGACTTGGTTCTCCTGATGACGATGACGCTCCAATCAAAATCTACTCTCTGATTT  
 BrTT8-2 (645) GATAAGACTTGGTTCTCCTGATGACGATGACGCTCCAATCAAAATCTACTCTCTGATTT  
 BoTT8 (702) GATAAGACTTGGTTCTCCTGATGACGATGACCTCCAATCAAAATCTACTCTCTGATTT

AtTT8 (780) TCATATTGAATCAACCATACGTTAGACACACATATGGACATGATGAATCTAATGGAGGA  
 BnTT8 (898) CCATATAGAAGCAACCAATAGTTTATAGATACACACATGGACATGATGAATCTAATGGAGGA  
 BrTT8-1 (777) CCATATAGAAGCAACCAATAGTTTATAGATACACACATGGACATGATGAATCTAATGGAGGA  
 BrTT8-2 (705) CCATATAGAAGCAACCAATAGTTTATAGATACACACATGGACATGATGAATCTAATGGAGGA  
 BoTT8 (762) CCATATAGAAGCAACCAATAGTTTATAGATACACACATGGACATGATGAATCTAATGGAGGA

AtTT8 (840) AGGTGGAAACTATTCTCAGACAGTAAACAACACTTCTCATGTCCACACCCACAAGTCTTCT  
 BnTT8 (958) AGGAGGAAATTATTCTCAGACAGTATCAACACTTCTCATGTCCACACCCACAAGTCTTCT  
 BrTT8-1 (837) AGGAGGAAATTATTCTCAGACAGTATCAACACTTCTCATGTCCACACCCACAAGTCTTCT  
 BrTT8-2 (765) AGGCGGAAATTATTCTCAGACAGTATCAACACTTCTCATGTCCACACCCACAAGTCTTCT  
 BoTT8 (822) AGGCGGAAATTATTCTCAGACAGTATCAACACTTCTCATGTCCACACCCACCAGTCTTCT

AtTT8 (900) TTCAGATTCAGTTTCCACATCTTCTTACATCCAATCATCGTTTGCCACGTGGAGGGTTGA  
 BnTT8 (1018) TTCAGATTCAGTTTCCACATCTTCTTACGTTCAATCATCGTTTGTCTCGTGGAGAGTTGA  
 BrTT8-1 (897) TTCAGATTCAGTTTCCACATCTTCTTACGTTCAATCATCGTTTGTCTCGTGGAGAGTTGA  
 BrTT8-2 (825) TTCAGATTCAGTTTCCACATCTTCTTACGTTCAATCATCGTTTGTCTCGTGGAGAGTTGA  
 BoTT8 (882) TTCAGATTCAGTTTCCACATCTTCTTACGTTCAATCATCGTTTATATCGTGGAGAGTTGA

AtTT8 (960) GAATGCGCAAAGAGCATCAGCA--A-----GTGAAAACGGCG---CCGTCGTCACA  
 BnTT8 (1078) GAATGTCAAAGAGCATCAGCAATATCAGCGAGTGGAGAAAAGCGGCGTGGTCATCGTCGCA  
 BrTT8-1 (957) GAATGTCAAAGAGCATCAGCAATATCAGCGAGTGGAGAAAAGCGGCGTGGTCATCGTCGCA  
 BrTT8-2 (885) GAATGTCAAAGAGCATCAGCAATATCAGCGAGTGGAGAAAAGCGGCGTGGTCATCGTCGCA  
 BoTT8 (942) GAATGTCAAAGAGCATCAGCAATATCAGCGAGTGGAGAAAAGCGGCGTCTTCGTCGTCGCA

AtTT8 (1005) ATGGGTGCTCAAACAATGATCTTCAAGATTCCCTTCCATGACAACACTAAAGATAA  
 BnTT8 (1138) ATGGATGCTCAAACACATAATCTTGAAGTTCCCTTCCATGACAACACTAAAGATAA  
 BrTT8-1 (1017) ATGGATGCTCAAACACATAATCTTGAAGTTCCCTTCCATGACAACACTAAAGATAA  
 BrTT8-2 (945) ATGGATGCTCAAACACATAATCTTGAAGTTCCCTTCCATGACAACACTAAAGATAA  
 BoTT8 (1002) ATGGATGCTCAAACACATAATCTTGAAGTTCCCTTCCATGACAACACTAAAGATAA

AtTT8 (1065) GAGGCTACCGCGGAAGATCTGAGCCAGTAGTAGCAGAGCGACGCAGGAGGGAGAAGCT  
 BnTT8 (1198) GAGGCTACCGCGAGAAGAGCTTAACCATGTGGTGGCCGAGCGACGCAGAAGAGAGAAGCT  
 BrTT8-1 (1077) GAGGCTACCGCGAGAAGAGCTTAACCATGTGGTGGCCGAGCGACGCAGAAGAGAGAAGCT  
 BrTT8-2 (1005) GAGGCTACCGCGAGAAGAGCTTAACCATGTGGTGGCCGAGCGACGCAGAAGAGAGAAGCT  
 BoTT8 (1062) GAGGCTGCCGCGAGAAGAGCTTAACCATGTGGTGGCCGAGCGACGCAGAAGAGAGAAGCT

AtTT8 (1125) GAACGAGAAATTCATAACGTTGAGATCAATGGTTCCATTTGTGACCAAGATGGATAAAAGT  
 BnTT8 (1258) AAATGAGAGATTCATAACGTTGAGATCAATGGTTCCATTTGTGACCAAGATGGATAAAAGT  
 BrTT8-1 (1137) AAATGAGAGATTCATAACGTTGAGATCAATGGTTCCATTTGTGACCAAGATGGATAAAAGT  
 BrTT8-2 (1065) AAATGAGAGATTCATAACGTTGAGATCAATGGTTCCATTTGTGACCAAGATGGATAAAAGT  
 BoTT8 (1122) AAATGAGAGATTCATAACGTTGAGATCAATGGTTCCATTTGTGACCAAGATGGATAAAAT

AtTT8 (1185) CTCAATCCTTGGAGACACCATTGCGTACGTAATCATCTTCGAAAGAGGGTCCATGAGCT  
 BnTT8 (1318) CTCGATCCTTGGAGACACCATTGAATACGTAATCATCTTCTAAGAGGATACATGAGCT  
 BrTT8-1 (1197) CTCGATCCTTGGAGACACCATTGAATACGTAATCATCTTCTAAGAGGATACATGAGCT  
 BrTT8-2 (1125) CTCGATCCTTGGAGACACCATTGAATACGTAATCATCTTCTAAGAGGATACATGAGCT  
 BoTT8 (1182) CTCGATCCTTGGAGACACCATTGAGTACGTAATCATCTTCTAAGAGGATCCATGAGCT

AtTT8 (1245) TGAGAACTACTCATCATGAGCAACGCATTAAGCGGACGCGTACTTGTAAGAGAAAAACATC  
 BnTT8 (1378) GGAATCTACTCATCACGAGCCAACCAAAAGCGGATGCGTATCGGTAAGGGAAGAACTTG

BrTT8-1 (1257) GGAATCTACTCATCACGAGCCAAACCAAAGCGGATGCGTATCGGTAAGGGAAGAACTTG  
 BrTT8-2 (1185) GGAATCTACTCATCACGAGCCAAACCAAAGCGGATGCGTATCGGTAAGGGAAGAACTTG  
 BoTT8 (1242) GGAATCTACTCATCACGAGCCAAACCAAAGCGGATGCGTATCTGTAAGGGAAGAACTTG  
  
 AtTT8 (1305) GGAGGAGGTGGAGGTTTCCATCATAGAGAATGATGTTTTGTTAGAGATGAGATGTGAGTA  
 BnTT8 (1438) GGAAGAGGTGGAGGTTTCCATTATAGAGAGCGATGTTTTGTTAGAGATGAGATGCGGAGTA  
 BrTT8-1 (1317) GGAAGAGGTGGAGGTTTCCATTATAGAGAGCGATGTTTTGTTAGAGATGAGATGCGGAGTA  
 BrTT8-2 (1245) GGAAGAGGTGGAGGTTTCCATTATAGAGAGCGATGTTTTGTTAGAGATGAGATGCGGAGTA  
 BoTT8 (1302) GGAAGAGGTGGAGGTTTCCATTATAGAGAGCGATGTTTTGTTAGAGATGAGATGCGGAGTA  
  
 AtTT8 (1365) CCGAGATGGTTTTGTTGCTTGACATTCCTCAGGTTCTTCATGAGCTTGGTATAGAGACTAC  
 BnTT8 (1498) CCGAGATGGTTTTATTGCTCAACATTCCTCAGGTACTTAAGGAGCTGGGTATAGAGACCAC  
 BrTT8-1 (1377) CCGAGATGGTTTTATTGCTCAACATTCCTCAGGTACTTAAGGAGCTGGGTATAGAGACCAC  
 BrTT8-2 (1305) CCGAGATGGTTTTATTGCTCAACATTCCTCAGGTACTTAAGGAGCTGGGTATAGAGACCAC  
 BoTT8 (1362) CCGAGATGGTTTTATTGCTCAACATTCCTCAGGTACTTAAGGAGCTAGGTATAGAGACCAC  
  
 AtTT8 (1425) GGCAGTTCATACCTCGGTGAACGACCATGATTTTCGAGGCGGAGATAAGGGCGAAAGTAAG  
 BnTT8 (1558) TGCGGTTACACTGCCTTGAACGACAATCATTTCGAGGAGAGATAAGGGCGAAAGTGAG  
 BrTT8-1 (1437) TGCGGTTACACTGCCTTGAACGACAATCATTTCGAGGAGAGATAAGGGCGAAAGTGAG  
 BrTT8-2 (1365) TGCGGTTACACTGCCTTGAACGACAATCATTTCGAGGAGAGATAAGGGCGAAAGTGAG  
 BoTT8 (1422) TGCGGTTACACTGCCTTGAACGACCACCATTTCGAGGAGAGATAAGGGCGAAAGTGAG  
  
 AtTT8 (1485) AGGGAAGAAAGCAAGCATCGCTGAGGTCAAAGAGCCATCCACCAAGTCATAATACATGA  
 BnTT8 (1618) AGGGAAGAAACCAACCATTGCTGAGGTTAAAATAGCCATCCATCAAATCATAT---ATAA  
 BrTT8-1 (1497) AGGGAAGAAACCAACCATTGCTGAGGTTAAAATAGCCATCCATCAAATCATAT---ATAA  
 BrTT8-2 (1425) AGGGAAGAAACCAACCATTGCTGAGGTTAAAATAGCCATCCATCAAATCATAT---ATAA  
 BoTT8 (1482) AGGGAAGAAACCAACCATTGCTGAGGTTAAAATAGCCATCCATCAAATCATAT---ATAA  
  
 AtTT8 (1545) TACTAATCTATAG-----  
 BnTT8 (1675) TAATAAACTCTAGTTCGGAGATTCCTAACCTTAATGATGCAACTTTAGAGAAGGACATGTG  
 BrTT8-1 (1554) TAATAAACTCTAG-----  
 BrTT8-2 (1482) TAATAAACTCTAG-----  
 BoTT8 (1539) TAATAAACTCTAG-----  
  
 AtTT8 (1558) -----  
 BnTT8 (1735) ATCGCTTATTTAATTTTAGCGTCGCTATGCTACATTATCAGTTTTACATATACAAAATA  
 BrTT8-1 (1567) -----  
 BrTT8-2 (1495) -----  
 BoTT8 (1552) -----  
  
 AtTT8 (1558) -----  
 BnTT8 (1795) TTGTCTATGTTAAAAAAAAAAAAAAAAAAAAAAAAAAAAAAAAAAAAAAAAA  
 BrTT8-1 (1567) -----  
 BrTT8-2 (1495) -----  
 BoTT8 (1552) -----

### 13. BnTTG1

AtTTG1 (1) -----  
 BnTTG1-1 (1) -----  
 BnTTG1-2 (1) -----  
 BnTTG1.1 (1) -----  
 BnTTG1.2 (1) -----  
 BrTTG1\_P8 (1) -----  
 BrTTG1\_Tsuda (1) -----  
 BrTTG1\_Y195-93 (1) -----  
 BrTTG1 (1) -----  
 BoTTG1-1 (1) AATGGTTACCACCTTTTTGTGACCAATTTATATTTTTTAATCTTGAGCTGATTTTTAAG  
 BoTTG1-2 (1) -----  
  
 AtTTG1 (1) -----  
 BnTTG1-1 (1) -----  
 BnTTG1-2 (1) -----

|                |       |                                                               |
|----------------|-------|---------------------------------------------------------------|
| BnTTG1.1       | (1)   | -----                                                         |
| BnTTG1.2       | (1)   | -----                                                         |
| BrTTG1_P8      | (1)   | -----                                                         |
| BrTTG1_Tsuda   | (1)   | -----                                                         |
| BrTTG1_Y195-93 | (1)   | -----                                                         |
| BrTTG1         | (1)   | -----                                                         |
| BoTTG1-1       | (61)  | AAAATCCACTACTTATGGTTCTATTTTTATCTTGTTTAAAATTTTATTATAAGTTTTTCT  |
| BoTTG1-2       | (1)   | -----                                                         |
| AtTTG1         | (1)   | -----                                                         |
| BnTTG1-1       | (1)   | -----                                                         |
| BnTTG1-2       | (1)   | -----                                                         |
| BnTTG1.1       | (1)   | -----                                                         |
| BnTTG1.2       | (1)   | -----                                                         |
| BrTTG1_P8      | (1)   | -----                                                         |
| BrTTG1_Tsuda   | (1)   | -----                                                         |
| BrTTG1_Y195-93 | (1)   | -----                                                         |
| BrTTG1         | (1)   | -----                                                         |
| BoTTG1-1       | (121) | TTCATTAATATACATAAATTGTTAATGAATAAGTATTATCAACCTATACTTGTGCTGCTC  |
| BoTTG1-2       | (1)   | -----                                                         |
| AtTTG1         | (1)   | -----                                                         |
| BnTTG1-1       | (1)   | -----                                                         |
| BnTTG1-2       | (1)   | -----                                                         |
| BnTTG1.1       | (1)   | -----                                                         |
| BnTTG1.2       | (1)   | -----                                                         |
| BrTTG1_P8      | (1)   | -----                                                         |
| BrTTG1_Tsuda   | (1)   | -----                                                         |
| BrTTG1_Y195-93 | (1)   | -----                                                         |
| BrTTG1         | (1)   | -----                                                         |
| BoTTG1-1       | (181) | GGGGAAAATAAAAATAAAAGTAAGGCCACACAAGCGTAGAAAAGGTCAGCTATCCGTAGAC |
| BoTTG1-2       | (1)   | -----                                                         |
| AtTTG1         | (1)   | -----                                                         |
| BnTTG1-1       | (1)   | -----                                                         |
| BnTTG1-2       | (1)   | -----                                                         |
| BnTTG1.1       | (1)   | -----                                                         |
| BnTTG1.2       | (1)   | -----                                                         |
| BrTTG1_P8      | (1)   | -----                                                         |
| BrTTG1_Tsuda   | (1)   | -----                                                         |
| BrTTG1_Y195-93 | (1)   | -----                                                         |
| BrTTG1         | (1)   | -----                                                         |
| BoTTG1-1       | (241) | ACAAGACCCACAAAACGCGTAGATAGGCCATTATACATTAAACATTACTGACTGAGTCA   |
| BoTTG1-2       | (1)   | -----                                                         |
| AtTTG1         | (1)   | -----                                                         |
| BnTTG1-1       | (1)   | -----                                                         |
| BnTTG1-2       | (1)   | -----                                                         |
| BnTTG1.1       | (1)   | -----                                                         |
| BnTTG1.2       | (1)   | -----                                                         |
| BrTTG1_P8      | (1)   | -----                                                         |
| BrTTG1_Tsuda   | (1)   | -----                                                         |
| BrTTG1_Y195-93 | (1)   | -----                                                         |
| BrTTG1         | (1)   | -----                                                         |
| BoTTG1-1       | (301) | GAGGGTTCAGCTCAGCTCAGCTCAGCTCCGGCTCCAAATCGCAACTGACACTGACCGTGG  |
| BoTTG1-2       | (1)   | -----                                                         |
| AtTTG1         | (1)   | -----                                                         |
| BnTTG1-1       | (1)   | -----ATACCGAATCAAATCCATCTCACATTTTTTCCGG                       |
| BnTTG1-2       | (1)   | -----ATACCGAATCAAATCCATCTCACATTTTTTCCGG                       |
| BnTTG1.1       | (1)   | -----                                                         |
| BnTTG1.2       | (1)   | -----                                                         |
| BrTTG1_P8      | (1)   | -----                                                         |

|                |       |                                                                   |
|----------------|-------|-------------------------------------------------------------------|
| BrTTG1_Tsuda   | (1)   | -----                                                             |
| BrTTG1_Y195-93 | (1)   | -----                                                             |
| BrTTG1         | (1)   | -----                                                             |
| BoTTG1-1       | (361) | AACTTTCATCGTCGCCAAGAATCTTATACCGAATCAAATCCATCTCACATTTTTTCCGG       |
| BoTTG1-2       | (1)   | -----                                                             |
| AtTTG1         | (1)   | -----ATGGATAATTGAGCTCCAGATTCGTTATCCAGATCGGAA                      |
| BnTTG1-1       | (35)  | CGAGAGAGAGAGAGA--GACGATGGACAACTCAGCTCCAGACTCTTTACCTAGATCGGAA      |
| BnTTG1-2       | (35)  | CGAGAGAGAGAGAGAGAGACGATGGACAACTCAGCTCCGACTCTTTACCTAGATCGGAA       |
| BnTTG1.1       | (1)   | -----ATGGACAACTCAGCTCCAGACTCTTTACCTAGATCGGAA                      |
| BnTTG1.2       | (1)   | -----ATGGACAACTCAGCTCCAGACTCTTTACCTAGATCGGAA                      |
| BrTTG1_P8      | (1)   | -----ATGGACAACTCAGCTCCGACTCCTTACCTAGATCGGAA                       |
| BrTTG1_Tsuda   | (1)   | -----ATGGACAACGCAGCTCCGACTCCTTACCTAGATCGGAA                       |
| BrTTG1_Y195-93 | (1)   | -----ATGGACAACTCAGCTCCGACTCCTTACCTAGATCGGAA                       |
| BrTTG1         | (1)   | -----ATGGACAACTCAGCTCCGACTCCTTACCTAGATCGGAA                       |
| BoTTG1-1       | (421) | CGAGAGAGAGAGA---GACGATGGACAACTCAGCTCCAGACTCTTTACCTAGATCGGAA       |
| BoTTG1-2       | (1)   | -----ATGGACAACTCAGCTCCGACTCCTTACCTAGATCGGAA                       |
| AtTTG1         | (40)  | ACCGCCGTCACATACGACTCACCATATCCACTCTACGCCATGGCTTTCTCTTCTCTCCGC      |
| BnTTG1-1       | (93)  | ACCGCCGTCACCTACGACTCTCCTTACCCCTCTACGCCATGTCCTTCTC-----C           |
| BnTTG1-2       | (95)  | ACCGCCGTCACCTACGACTCTCCGTACCCGCTCTACGCCATGTCCTTCTC-----C          |
| BnTTG1.1       | (40)  | ACCGCCGTCACCTACGACTCTCCTTACCCCTCTACGCCATGTCCTTCTC-----C           |
| BnTTG1.2       | (40)  | ACCGCCGTCACCTACGACTCTCCGTACCCGCTCTACGCCATGTCCTTCTC-----C          |
| BrTTG1_P8      | (40)  | ACCGCCGTCACCTACGACTCTCCTTACCCCTCTACGCCATGTCCTTCTC-----C           |
| BrTTG1_Tsuda   | (40)  | ACCGCCGTCACCTACGACTCTCCTTACCCCTCTACGCCATGTCCTTCTC-----C           |
| BrTTG1_Y195-93 | (40)  | ACCGCCGTCACCTACGACTCTCCTTACCCCTCTACGCCATGTCCTTCTC-----C           |
| BrTTG1         | (40)  | ACCGCCGTCACCTACGACTCTCCTTACCCCTCTACGCCATGTCCTTCTC-----C           |
| BoTTG1-1       | (477) | ACTGCCGTCACCTACGACTCTCCGTACCCCTCTACGCCATGTCCTTCTC-----C           |
| BoTTG1-2       | (40)  | ACCGCCGTCACCTACGACTCTCCGTACCCCTCTACGCCATGTCCTTCTC-----C           |
| AtTTG1         | (100) | TCATCCTCCGGTCACAGAATCGCCGTCGGAAGCTTCTCGAAGATTACAACAACCGCATC       |
| BnTTG1-1       | (144) | TCCTCCACC---CACCGAATCGCCGTCGGGAGCTTCTCGAGGACTACAACAACCGCATC       |
| BnTTG1-2       | (146) | TCCTCCACC---CACCGAATCGCCGTCGGGAGCTTCTCGAGGACTACAACAACCGCATC       |
| BnTTG1.1       | (91)  | TCCTCCACC---CACCGAATCGCCGTCGGGAGCTTCTCGAGGACTACAACAACCGCATC       |
| BnTTG1.2       | (91)  | TCCTCCACC---CACCGAATCGCCGTCGGGAGCTTCTCGAGGACTACAACAACCGCATC       |
| BrTTG1_P8      | (91)  | TCCTCCACC---CACCGAATCGCCGTCGGAAGCTTCTCGAGGACTACAACAACCGCATC       |
| BrTTG1_Tsuda   | (91)  | TCCTCCACC---CACCGAATCGCCGTCGGGAGCTTCTCGAGGACTACAACAACCGCATC       |
| BrTTG1_Y195-93 | (91)  | TCCTCCACC---CACCGAATCGCCGTCGGAAGCTTCTCGAAGACTACAACAACCGCATC       |
| BrTTG1         | (91)  | TCCTCCACC---CACCGAATCGCCGTCGGGAGCTTCTCGAGGACTACAACAACCGCATC       |
| BoTTG1-1       | (528) | TCCTCCACC---CACCGAATCGCCGTCGGGAGCTTCTCGAGGACTACAACAACCGCATC       |
| BoTTG1-2       | (91)  | TCCTCCACC---CACCGAATCGCCGTCGGGAGCTTCTCGAGGACTACAACAACCGCATC       |
| AtTTG1         | (160) | GACATCTCTCTTTTCGATTCCGATTCGAATCAATGACCGTTAAGCCTCTCCCGAATCTCTCCTTC |
| BnTTG1-1       | (201) | GACATCCTCTCCTTCGACTCCGACTCCATGTCCCTCAAGCCCTCCCGTCCCTCTCCTTC       |
| BnTTG1-2       | (203) | GACATCCTCTCCTTCGACTCCGACTCCATGTCCCTCAAGCCCTCCCATCCCTCTCCTTC       |
| BnTTG1.1       | (148) | GACATCCTCTCCTTCGACTCCGACTCCATGTCCCTCAAGCCCTCCCGTCCCTCTCCTTC       |
| BnTTG1.2       | (148) | GACATCCTCTCCTTCGACTCCGACTCCATGTCCCTCAAGCCCTCCCATCCCTCTCCTTC       |
| BrTTG1_P8      | (148) | GACATCCTCTCCTTCGACTCCGACTCCATGTCCCTCAAGCCCTCCCGTCCCTCTCCTTC       |
| BrTTG1_Tsuda   | (148) | GACATCCTCTCCTTCGACTCCGACTCCATGTCCCTCAAGCCCTCCCGTCCCTCTCCTTC       |
| BrTTG1_Y195-93 | (148) | GACATCCTCTCCTTCGACTCCGACTCCATGTCCCTCAAGCCCTCCCGTCCCTCTCCTTC       |
| BrTTG1         | (148) | GACATCCTCTCCTTCGACTCCGACTCCATGTCCCTCAAGCCCTCCCGTCCCTCTCCTTC       |
| BoTTG1-1       | (585) | GACATCCTCTCCTTCGACTCCGACTCCATGTCCCTCAAGCCCTCCCGTCCCTCTCCTTC       |
| BoTTG1-2       | (148) | GACATCCTCTCCTTCGACTCCGACTCCATGTCCCTCAAGCCCTCCCGTCCCTCTCCTTC       |
| AtTTG1         | (220) | GAGCATCCTTATCCTCCAACAAGCTAATGTTTCAGTCCCTCCTTCTTCCGTCGTCCTTCC      |
| BnTTG1-1       | (261) | GAGCACCTTACCCTCCACCAAGCTCATGTTTCAGTCCCTCCTTCTTCCGTCGTCCTTCC       |
| BnTTG1-2       | (263) | GAGCACCTTACCCTCCACCAAGCTCATGTTTCAGTCCCTCCTTCTTCCGTCGTCCTTCC       |
| BnTTG1.1       | (208) | GAGCACCTTACCCTCCACCAAGCTCATGTTTCAGTCCCTCCTTCTTCCGTCGTCCTTCC       |
| BnTTG1.2       | (208) | GAGCACCTTACCCTCCACCAAGCTCATGTTTCAGTCCCTCCTTCTTCCGTCGTCCTTCC       |
| BrTTG1_P8      | (208) | GAGCACCTTACCCTCCACCAAGCTCATGTTTCAGTCCCTCCTTCTTCCGTCGTCCTTCC       |
| BrTTG1_Tsuda   | (208) | GAGCACCTTACCCTCCACCAAGCTCATGTTTCAGTCCCTCCTTCTTCCGTCGTCCTTCC       |
| BrTTG1_Y195-93 | (208) | GAGCACCTTACCCTCCACCAAGCTCATGTTTCAGTCCCTCCTTCTTCCGTCGTCCTTCC       |
| BrTTG1         | (208) | GAGCACCTTACCCTCCACCAAGCTCATGTTTCAGTCCCTCCTTCTTCCGTCGTCCTTCC       |

BoTTG1-1 (645) GAGCACCTTACCTCCACGAAGCTCATGTTCCAGCCCCCTCCCTCCGCGCAGCAGC  
 BoTTG1-2 (208) GAGCACCTTACCTCCACGAAGCTCATGTTCCAGCCCCCTCCCTCCGCGCAGCAGC  
  
 AtTTG1 (280) TCCGGAGATCTCCTCGCTTCCTCCGGCGATTTCCCTCCGTCCTTGGGAAATTAACGAAGAT  
 BnTTG1-1 (321) GCGGGCGACTCCTCGCTCCTCCGGCGACTTCCTCCGCTCTGGGAGGTCAACGAAGAC  
 BnTTG1-2 (323) GGGGGCGACTCCTCGCTCCTCCGGCGACTTCCTCCGCTCTGGGAGGTCAACGAAGAC  
 BnTTG1.1 (268) GCGGGCGACTCCTCGCTCCTCCGGCGACTTCCTCCGCTCTGGGAGGTCAACGAAGAC  
 BnTTG1.2 (268) GGGGGCGACTCCTCGCTCCTCCGGCGACTTCCTCCGCTCTGGGAGGTCAACGAAGAC  
 BrTTG1\_P8 (268) GCGGGCGACTCCTCGCTCCTCCGGCGACTTCCTCCGCTCTGGGAGGTCAACGAAGAC  
 BrTTG1\_Tsuda (268) GCGGGCGACTCCTCGCTCCTCCGGCGACTTCCTCCGCTCTGGGAGGTCAACGAAGAC  
 BrTTG1\_Y195-93 (268) GCGGGCGACTCCTCGCTCCTCCGGCGACTTCCTCCGCTCTGGGAGGTCAACGAAGAC  
 BrTTG1 (268) GCGGGCGACTCCTCGCTCCTCCGGCGACTTCCTCCGCTCTGGGAGGTCAACGAAGAC  
 BoTTG1-1 (705) GGGGGCGACTCCTCGCTCCTCCGGCGACTTCCTCCGCTCTGGGAGGTCAACGAAGAC  
 BoTTG1-2 (268) GGGGGCGACTCCTCGCTCCTCCGGCGACTTCCTCCGCTCTGGGAGGTCAACGAAGAC  
  
 AtTTG1 (340) TCATCAACCGTCGAGCCAATCTCGGTCTCAACAACAGCAAAACGAGCGAGTTTGTGCG  
 BnTTG1-1 (381) TCCTCCTCCGCGGAGCCAGTATCCGTCTCAACAACAGCAAGACGAGCGAGTTCTGCGCG  
 BnTTG1-2 (383) TCCTCCTCCGCGGAGCCAGTATCCGTCTCAACAACAGCAAGACGAGCGAGTTCTGCGCG  
 BnTTG1.1 (328) TCCTCCTCCGCGGAGCCAGTATCCGTCTCAACAACAGCAAGACGAGCGAGTTCTGCGCG  
 BnTTG1.2 (328) TCCTCCTCCGCGGAGCCAGTATCCGTCTCAACAACAGCAAGACGAGCGAGTTCTGCGCG  
 BrTTG1\_P8 (328) TCCTCCTCCGCGGAGCCAGTATCCGTCTCAACAACAGCAAGACGAGCGAGTTCTGCGCG  
 BrTTG1\_Tsuda (328) TCCTCCTCCGCGGAGCCAGTATCCGTCTCAACAACAGCAAGACGAGCGAGTTCTGCGCG  
 BrTTG1\_Y195-93 (328) TCCTCCTCCGCGGAGCCAGTATCCGTCTCAACAACAGCAAGACGAGCGAGTTCTGCGCG  
 BrTTG1 (328) TCCTCCTCCGCGGAGCCAGTATCCGTCTCAACAACAGCAAGACGAGCGAGTTCTGCGCG  
 BoTTG1-1 (765) TCCTCCTCCGCGGAGCCAGTATCCGTCTCAACAACAGCAAGACGAGCGAGTTCTGCGCG  
 BoTTG1-2 (328) TCCTCCTCCGCGGAGCCAGTATCCGTCTCAACAACAGCAAGACGAGCGAGTTCTGCGCG  
  
 AtTTG1 (400) CCGTTGACTTCTTCGATTGGAACGATGTAGAGCCGAAACGTCTCGAACTTGTAGTATT  
 BnTTG1-1 (441) CCGCTGACCTCCTTCGACTGGAACGACGTGAGCCGAAGCGGTTAGGCACGTGCAGCATC  
 BnTTG1-2 (443) CCGCTGACCTCCTTCGACTGGAACGACGTGAGCCGAAGCGGTTAGGCACGTGCAGCATC  
 BnTTG1.1 (388) CCGCTGACCTCCTTCGACTGGAACGACGTGAGCCGAAGCGGTTAGGCACGTGCAGCATC  
 BnTTG1.2 (388) CCGCTGACCTCCTTCGACTGGAACGACGTGAGCCGAAGCGGTTAGGCACGTGCAGCATC  
 BrTTG1\_P8 (388) CCGCTGACCTCCTTCGACTGGAACGACGTGAGCCGAAGCGGTTAGGCACGTGCAGCATC  
 BrTTG1\_Tsuda (388) CCGCTGACCTCCTTCGACTGGAACGACGTGAGCCGAAGCGGTTAGGCACGTGCAGCATC  
 BrTTG1\_Y195-93 (388) CCGCTGACCTCCTTCGACTGGAACGACGTGAGCCGAAGCGGTTAGGCACGTGCAGCATC  
 BrTTG1 (388) CCGCTGACCTCCTTCGACTGGAACGACGTGAGCCGAAGCGGTTAGGCACGTGCAGCATC  
 BoTTG1-1 (825) CCGCTGACCTCCTTCGACTGGAACGACGTGAGCCGAAGCGGTTAGGCACGTGCAGCATC  
 BoTTG1-2 (388) CCGCTGACCTCCTTCGACTGGAACGACGTGAGCCGAAGCGGTTAGGCACGTGCAGCATC  
  
 AtTTG1 (460) GATACGACGTGTACGATTTGGGATATTGAGAAGTCTGTTGTTGAGACTCAGCTTATAGCT  
 BnTTG1-1 (501) GACACCACGTGCACGATCTGGGACGTGGAGAGGTCCGTGGTGGAGACGCAGCTCATCCGG  
 BnTTG1-2 (503) GACACCACGTGCACGATCTGGGACGTGGAGAGGTCCGTGGTGGAGACGCAGCTCATCCGG  
 BnTTG1.1 (448) GACACCACGTGCACGATCTGGGACGTGGAGAGGTCCGTGGTGGAGACGCAGCTCATCCGG  
 BnTTG1.2 (448) GACACCACGTGCACGATCTGGGACGTGGAGAGGTCCGTGGTGGAGACGCAGCTCATCCGG  
 BrTTG1\_P8 (448) GACACCACGTGCACGATCTGGGACGTGGAGAGGTCCGTGGTGGAGACGCAGCTCATCCGG  
 BrTTG1\_Tsuda (448) GACACCACGTGCACGATCTGGGACGTGGAGAGGTCCGTGGTGGAGACGCAGCTCATCCGG  
 BrTTG1\_Y195-93 (448) GACACCACGTGCACGATCTGGGACGTGGAGAGGTCCGTGGTGGAGACGCAGCTCATCCGG  
 BrTTG1 (448) GACACCACGTGCACGATCTGGGACGTGGAGAGGTCCGTGGTGGAGACGCAGCTCATCCGG  
 BoTTG1-1 (885) GACACCACGTGCACGATCTGGGACGTGGAGAGGTCCGTGGTGGAGACGCAGCTCATCCGG  
 BoTTG1-2 (448) GACACCACGTGCACGATCTGGGACGTGGAGAGGTCCGTGGTGGAGACGCAGCTCATCCGG  
  
 AtTTG1 (520) CATGATAAAGAGGTTTCATGACATTGCTTGGGGAGAAGCTAGGGTTTTTCGCATCAGTCTCT  
 BnTTG1-1 (561) CACGACAAGGAGGTCCACGACATCGCTGGGGGGAGGCTAGGGTTTTTCGCCTCGGTCTCC  
 BnTTG1-2 (563) CACGACAAGGAGGTCCACGACATCGCTGGGGGGAGGCTAGGGTTTTTCGCCTCGGTCTCC  
 BnTTG1.1 (508) CACGACAAGGAGGTCCACGACATCGCTGGGGGGAGGCTAGGGTTTTTCGCCTCGGTCTCC  
 BnTTG1.2 (508) CACGACAAGGAGGTCCACGACATCGCTGGGGGGAGGCTAGGGTTTTTCGCCTCGGTCTCC  
 BrTTG1\_P8 (508) CACGACAAGGAGGTCCACGACATCGCTGGGGGGAGGCTAGGGTTTTTCGCCTCGGTCTCC  
 BrTTG1\_Tsuda (508) CACGATAAAGAGGTTTCACGACATCGCTGGGGGGAGGCTAGGGTTTTTCGCCTCGGTCTCC  
 BrTTG1\_Y195-93 (508) CACGACAARGAGGTCCACGACATCGCTGGGGGGAGGCTAGGGTTTTTCGCCTCGGTCTCC  
 BrTTG1 (508) CACGACAAGGAGGTCCACGACATCGCTGGGGGGAGGCTAGGGTTTTTCGCCTCGGTCTCC  
 BoTTG1-1 (945) CACGACAAGGAGGTCCACGACATCGCTGGGGGGAGGCTAGGGTTTTTCGCCTCGGTCTCC  
 BoTTG1-2 (508) CACGACAAGGAGGTCCACGACATCGCTGGGGGGAGGCTAGGGTTTTTCGCCTCGGTCTCC

AtTTG1 (580) GCTGATGGATCCGTTAGGATCTTTGATTTACGTGATAAGGAACATTCTACAATCATTTAC  
 BnTTG1-1 (621) GCCGACGGATCGGTGAGGATCTTCGATCTGCGCGACAAGGA**GCAC**TCCACCATCATCTAC  
 BnTTG1-2 (623) GCCGACGGATCGGTGAGGATCTTCGATCTGCGCGACAAGGA**GCAC**TCCACCATCATCTAC  
 BnTTG1.1 (568) GCCGACGGATCGGTGAGGATCTTCGATCTGCGCGACAAGGA**GCAC**TCCACCATCATCTAC  
 BnTTG1.2 (568) GCCGACGGATCGGTGAGGATCTTCGATCTGCGCGACAAGGA**GCAC**TCCACCATCATCTAC  
 BrTTG1\_P8 (568) GCCGACGGATCGGTGAGGATCTTCGATCTGCGCGACAAGGA**GCAC**TCCACCATCATCTAC  
 BrTTG1\_Tsuda (568) GCCGACGGATCGGTGAGGATCTTCGATCTGCGCGACAAGGAGCACTCCACCATCATCTAC  
 BrTTG1\_Y195-93 (568) GCCGACGGATCGGTGAGGATCTTCGATCTGCGCGACAAGGAGCACTCCACCATCATCTAC  
 BrTTG1 (568) GCCGACGGATCGGTGAGGATCTTCGATCTGCGCGACAAGGAGCACTCCACCATCATCTAC  
 BoTTG1-1 (1005) GCCGACGGATCGGTGAGGATCTTCGATCTGCGCGACAAGGAGCACTCCACCATCATCTAC  
 BoTTG1-2 (568) GCCGACGGATCGGTGAGGATCTTCGATCTGCGCGACAAGGAGCACTCCACCATCATCTAC  
  
 AtTTG1 (640) GAGAGTCTCAGCCTGATACGCCCTTTGTTAAGACTTGCTTGAACAACAAGATCTTAGA  
 BnTTG1-1 (681) **G**AGAGCCCCAGCCCGATACGCCGCTCCTGAGGCTCGCGTGAACAAGCAGGACTTGAGG  
 BnTTG1-2 (683) **G**AGAGCCCCAGCCCGATACGCCGCTCCTGAGGCTCGCGTGAACAAGCAGGACTTGCGG  
 BnTTG1.1 (628) **G**AGAGCCCCAGCCCGATACGCCGCTCCTGAGGCTCGCGTGAACAAGCAGGACTTGAGG  
 BnTTG1.2 (628) **G**AGAGCCCCAGCCCGATACGCCGCTCCTGAGGCTCGCGTGAACAAGCAGGACTTGCGG  
 BrTTG1\_P8 (628) GAGAGCCCCAGCCCGATACGCCGCTCCTGAGGCTCGCGTGAACAAGCAGGACTTGAGG  
 BrTTG1\_Tsuda (628) GAGAGCCCCAGCCCGATACGCCGCTCCTGAGGCTCGCGTGAACAAGCAGGACTTGAGG  
 BrTTG1\_Y195-93 (628) GAGAGCCCCAGCCCGATACGCCGCTCCTGAGGCTCGCGTGAACAAGCAGGACTTGAGG  
 BrTTG1 (628) GAGAGCCCCAGCCCGATACGCCGCTCCTGAGGCTCGCGTGAACAAGCAGGACTTGAGG  
 BoTTG1-1 (1065) GAGAGCCCCAGCCCGATACGCCGCTCCTGAGGCTCGCGTGAACAAGCAGGACTTGAGG  
 BoTTG1-2 (628) GAGAGCCCCAGCCCGATACGCCGCTCCTGAGGCTCGCGTGAACAAGCAGGACTTGAGG  
  
 AtTTG1 (700) TATATGGCTACGATTTTGATGGATTCTAATAAGGTTGTGATTCTCGATATTGCTTCGCCG  
 BnTTG1-1 (741) TGTATGGCCACGATTCTGATGGATTCTGAATAAGGTTGTGATTCTCGATATTGCTTCGCCG  
 BnTTG1-2 (743) TGTATGGCCACGATTCTGATGGATTCTGAATAAGGTTGTGATTCTCGATATTGCTTCGCCG  
 BnTTG1.1 (688) TGTATGGCCACGATTCTGATGGATTCTGAATAAGGTTGTGATTCTCGATATTGCTTCGCCG  
 BnTTG1.2 (688) TGTATGGCCACGATTCTGATGGATTCTGAATAAGGTTGTGATTCTCGATATTGCTTCGCCG  
 BrTTG1\_P8 (688) TGTATGGCCACGATTCTGATGGATTCTGAATAAGGTTGTGATTCTCGATATTGCTTCGCCG  
 BrTTG1\_Tsuda (688) TGTATGGCCACGATTCTGATGGATTCTGAATAAGGTTGTGATTCTCGATATTGCTTCGCCG  
 BrTTG1\_Y195-93 (688) TGTATGGCCACGATTCTGATGGATTCTGAATAAGGTTGTGATTCTCGATATTGCTTCGCCG  
 BrTTG1 (688) TGTATGGCCACGATTCTGATGGATTCTGAATAAGGTTGTGATTCTCGATATTGCTTCGCCG  
 BoTTG1-1 (1125) TGTATGGCCACGATTCTGATGGATTCTGAATAAGGTTGTGATTCTCGATATTGCTTCGCCG  
 BoTTG1-2 (688) TGTATGGCCACGATTCTGATGGATTCTGAATAAGGTTGTGATTCTCGATATTGCTTCGCCG  
  
 AtTTG1 (760) ACTATGCCTGTTGCTGAGCTTGAAAGACATCAGGCTAGTGTGAATGCTATAGCTTGGGCC  
 BnTTG1-1 (801) ACGATGCCTGTGCGGAGCTGGAGCGCACCCAGGGGAGTGTGAATGCGATTGCTTGGGCC  
 BnTTG1-2 (803) ACGATGCCTGTGCGGAGCTTGAAAGGCACCCAGGGGAGTGTGAACGCGATTGCTTGGGCC  
 BnTTG1.1 (748) ACGATGCCTGTGCGGAGCTGGAGCGCACCCAGGGGAGTGTGAATGCGATTGCTTGGGCC  
 BnTTG1.2 (748) ACGATGCCTGTGCGGAGCTTGAAAGGCACCCAGGGGAGTGTGAACGCGATTGCTTGGGCC  
 BrTTG1\_P8 (748) ACGATGCCTGTGCGGAGCTGGAGCGCACCCAGGGGAGTGTGAACGCGATTGCTTGGGCC  
 BrTTG1\_Tsuda (748) ACGATGCCTGTGCGGAGCTGGAGCGCACCCAGGGGAGTGTGAACGCGATTGCTTGGGCC  
 BrTTG1\_Y195-93 (748) ACGATGCCTGTGCGGAGCTGGAGCGCACCCAGGGGAGTGTGAACGCGATTGCTTGGGCC  
 BrTTG1 (748) ACGATGCCTGTGCGGAGCTGGAGCGCACCCAGGGGAGTGTGAACGCGATTGCTTGGGCC  
 BoTTG1-1 (1185) ACGATGCCTGTGCGGAGCTTGAAAGGCACCCAGGGGAGTGTGAATGCGATTGCTTGGGCC  
 BoTTG1-2 (748) ACGATGCCTGTGCGGAGCTTGAAAGGCACCCAGGGGAGTGTGAACGCGATTGCTTGGGCC  
  
 AtTTG1 (820) CCTCAGAGCTGTAACATATCTGCTCGGGTGGGATGACGCGCAGGCTCTTATCTGGGAG  
 BnTTG1-1 (861) CCGCAGAGCTGTAAGCATATCTGCTCGGGTGGGATGACGCGCAGGCTCTTATCTGGGAG  
 BnTTG1-2 (863) CCGCAGAGCTGTAAGCATATCTGCTCGGGTGGGATGACGCGCAGGCTCTTATCTGGGAG  
 BnTTG1.1 (808) CCGCAGAGCTGTAAGCATATCTGCTCGGGTGGGATGACGCGCAGGCTCTTATCTGGGAG  
 BnTTG1.2 (808) CCGCAGAGCTGTAAGCATATCTGCTCGGGTGGGATGACGCGCAGGCTCTTATCTGGGAG  
 BrTTG1\_P8 (808) CCGCAGAGCTGTAAGCATATCTGCTCGGGTGGGATGACGCGCAGGCTCTTATCTGGGAG  
 BrTTG1\_Tsuda (808) CCGCAGAGCTGTAAGCATATCTGCTCGGGTGGGATGACGCGCAGGCTCTTATCTGGGAG  
 BrTTG1\_Y195-93 (808) CCGCAGAGCTGTAAGCATATCTGCTCGGGTGGGATGACGCGCAGGCTCTTATCTGGGAG  
 BrTTG1 (808) CCGCAGAGCTGTAAGCATATCTGCTCGGGTGGGATGACGCGCAGGCTCTTATCTGGGAG  
 BoTTG1-1 (1245) CCGCAGAGCTGTAAGCATATCTGCTCGGGTGGGATGACGCGCAGGCTCTTATCTGGGAG  
 BoTTG1-2 (808) CCGCAGAGCTGTAAGCATATCTGCTCGGGTGGGATGACGCGCAGGCTCTTATCTGGGAG  
  
 AtTTG1 (880) CTTCTACTGTTGCTGGACCAATGGGATTGATCCGATGTGCGGTTTATCTGGCTGGTTCC  
 BnTTG1-1 (921) TTGCCGACGATGGCTGGACCGAATGGGATTGATCCATGTGCGGTTTACTCGGCCGGTTCC  
 BnTTG1-2 (923) TTGCCGACGATGGCTGGGCCGAATGGGATTGATCCATGTGCGGTTTACTCGGCCGGTTCC

BnTTG1.1 (868) TTGCCGACGATGGCTGGACCGAATGGGATTGATCCATGTCCGGTTACTCGGCCGGTTCCG  
 BnTTG1.2 (868) TTGCCGACGATGGCTGGGCCGAATGGGATTGATCCATGTCCGGTTACTCGGCCGGTTCCG  
 BrTTG1\_P8 (868) TTGCCGACGATGGCTGGACCGAATGGGATTGATCCATGTCCGGTTACTCGGCCGGTTCCG  
 BrTTG1\_Tsuda (868) TTGCCGACGATGGCTGGACCGAATGGGATTGATCCGATGTCCGGTTACTCGGCCGGTTCCG  
 BrTTG1\_Y195-93 (868) TTGCCGACGATGGCTGGACCGAATGGGATTGATCCGATGTCCGGTTACTCGGCCGGTTCCG  
 BrTTG1 (868) TTGCCGACGATGGCTGGACCGAATGGGATTGATCCATGTCCGGTTACTCGGCCGGTTCCG  
 BoTTG1-1 (1305) TTGCCGACGATGGCTGGACCGAATGGGATTGATCCATGTCCGGTTACTCGGCCGGTTCCG  
 BoTTG1-2 (868) TTGCCGACGATGGCTGGGCCGAATGGGATTGATCCATGTCCGGTTACTCGGCCGGTTCCG

AtTTG1 (940) GAGATTAATCAGTTGCAGTGGTCTTCTTCGTCAGCCTGATTGGATTGGTATTGCTTTTGCT  
 BnTTG1-1 (981) GAGATTAACCAGCTGCAGTGGTCTTCTTCGTTGCCTGATTGGATTGGCATTGCGTTTGCT  
 BnTTG1-2 (983) GAGATTAACCAGTTGCAGTGGTCTTCTCTGCCTGATTGGATTGGCATTGCGTTTGCT  
 BnTTG1.1 (928) GAGATTAACCAGCTGCAGTGGTCTTCTTCGTTGCCTGATTGGATTGGCATTGCGTTTGCT  
 BnTTG1.2 (928) GAGATTAACCAGTTGCAGTGGTCTTCTCTGCCTGATTGGATTGGCATTGCGTTTGCT  
 BrTTG1\_P8 (928) GAGATTAACCAGCTGCAGTGGTCTTCTTCGTTGCCTGATTGGATTGGCATTGCGTTTGCT  
 BrTTG1\_Tsuda (928) GAGATTAACCAGCTGCAGTGGTCTTCTTCGTTGCCTGATTGGATTGGCATTGCGTTTGCT  
 BrTTG1\_Y195-93 (928) GAGATTAACCAGCTGCAGTGGTCTTCTTCGTTGCCTGATTGGATTGGCATTGCGTTTGCT  
 BrTTG1 (928) GAGATTAACCAGCTGCAGTGGTCTTCTTCGTTGCCTGATTGGATTGGCATTGCGTTTGCT  
 BoTTG1-1 (1365) GAGATTAACCAGTTGCAGTGGTCTTCTTCGCTGCCTGATTGGATCGGCATTGCTTTCGCT  
 BoTTG1-2 (928) GAGATTAACCAGTTGCAGTGGTCTTCTTCGCTGCCTGATTGGATCGGCATTGCTTTCGCT

AtTTG1 (1000) AACAAAATGCAGCTCCTTAGAGTTTGA-----  
 BnTTG1-1 (1041) AACAAAATGCAGCTCCTTAGAGTTTGAGATGCAGATGGGGAAGTGATCAAAAATGGGAGAT  
 BnTTG1-2 (1043) AACAAAATGCAGCTCCTCAGAGTTTGAAGGTGGGGAAGTGATCAAAAATCAGA-GATAGCA  
 BnTTG1.1 (988) AACAAAATGCAGCTCCTTAGAGTTTGA-----  
 BnTTG1.2 (988) AACAAAATGCAGCTCCTTAGAGTTTGA-----  
 BrTTG1\_P8 (988) AACAAAATGCAGCTCCTTAGAGTTTGA-----  
 BrTTG1\_Tsuda (988) AACAAAATGCAGCTCCTTAGAGTTTGA-----  
 BrTTG1\_Y195-93 (988) AACAAAATGCAGCTCCTTAGAGTTTGA-----  
 BrTTG1 (988) AACAAAATGCAGCTCCTTAGAGTTTGA-----  
 BoTTG1-1 (1425) AACAAAATGCAGCTCCTCAGAGTTTGAAGTTTCGTATTGTTTTGAAAGTATGA-AATTGAT  
 BoTTG1-2 (988) AACAAAATGCAGCTCCTCAGAGTTTGA-----

AtTTG1 (1027) -----  
 BnTTG1-1 (1101) AGCATTAGACCCGTGGAACCAGTGCCTAAGCTTAGTGGGGTTTGGTGCAACCACATTCTG  
 BnTTG1-2 (1102) TAGACCCGTGTAACCAGTGCCTAAGCTTAGTAGGGTTTGGTTGGTGCAAGCACATTCTG  
 BnTTG1.1 (1015) -----  
 BnTTG1.2 (1015) -----  
 BrTTG1\_P8 (1015) -----  
 BrTTG1\_Tsuda (1015) -----  
 BrTTG1\_Y195-93 (1015) -----  
 BrTTG1 (1015) -----  
 BoTTG1-1 (1484) GATATCTCACTTGGTTAGTAGTGCCATAGTAGTCTTCTTGTAGCTAAAGATGGAGTCTTT  
 BoTTG1-2 (1015) -----

AtTTG1 (1027) -----  
 BnTTG1-1 (1161) GTTCTTTGATTTCGCAATGCGTCTCTGCATCTATGTGATTGTAACCTAAGACTTTATTCGT  
 BnTTG1-2 (1162) GTTCTTTGATTTCGCAATGCCTCTATGCATCTATGTGATCGTAACCTAAGACTTTATTCGC  
 BnTTG1.1 (1015) -----  
 BnTTG1.2 (1015) -----  
 BrTTG1\_P8 (1015) -----  
 BrTTG1\_Tsuda (1015) -----  
 BrTTG1\_Y195-93 (1015) -----  
 BrTTG1 (1015) -----  
 BoTTG1-1 (1544) ATTGCACTTTCACTAGGGTTTTAGGTGGACTATAGTTTCTGATGAAATGCAACCAGTTTC  
 BoTTG1-2 (1015) -----

AtTTG1 (1027) -----  
 BnTTG1-1 (1221) TTGGTGTACCAAATGCTCTACTATTTTATTATCTCTGTTTGTGTATAAACCAACCAGGA  
 BnTTG1-2 (1222) TTGGTGTACCAAATGCTCTACTATTTTATTATCTCTGTTTGTGTATAAACCAACCAGGA  
 BnTTG1.1 (1015) -----  
 BnTTG1.2 (1015) -----  
 BrTTG1\_P8 (1015) -----

```

BrTTG1_Tsuda (1015) -----
BrTTG1_Y195-93 (1015) -----
  BrTTG1 (1015) -----
  BoTTG1-1 (1604) TTTGTTATTCATCATCTCATGTTTGATATAAACATTTTATATTTTTTGTGCTGCATTTT
  BoTTG1-2 (1015) -----

  AtTTG1 (1027) -----
  BnTTG1-1 (1281) TAATAATAATGTTATTGCGGTGGTTTCTGGTGTGGATTGTGTAATCGGAGCTTTAGTAC
  BnTTG1-2 (1282) TAATAATGTTATTGCGGTGGTTAAAAAATAAAAAAAAAAAAAAAAA-----
  BnTTG1.1 (1015) -----
  BnTTG1.2 (1015) -----
  BrTTG1_P8 (1015) -----
  BrTTG1_Tsuda (1015) -----
  BrTTG1_Y195-93 (1015) -----
  BrTTG1 (1015) -----
  BoTTG1-1 (1664) CCGTTATAGTTGCTAACTATTTCACTTGGTGTGATGCAGGTGGGGAAGTGATCAAAAA
  BoTTG1-2 (1015) -----

  AtTTG1 (1027) -----
  BnTTG1-1 (1341) AACGCACCCTGTCTTAAAAAAAAAAAAAAAAAAAAAAAA-----
  BnTTG1-2 (1327) -----
  BnTTG1.1 (1015) -----
  BnTTG1.2 (1015) -----
  BrTTG1_P8 (1015) -----
  BrTTG1_Tsuda (1015) -----
  BrTTG1_Y195-93 (1015) -----
  BrTTG1 (1015) -----
  BoTTG1-1 (1724) TCGGAGATAGCATAGACCCGTGTAACCAGTGCCTAAGCTTAGTAGGGTTGGTTGGTGCA
  BoTTG1-2 (1015) -----

  AtTTG1 (1027) -----
  BnTTG1-1 (1377) -----
  BnTTG1-2 (1327) -----
  BnTTG1.1 (1015) -----
  BnTTG1.2 (1015) -----
  BrTTG1_P8 (1015) -----
  BrTTG1_Tsuda (1015) -----
  BrTTG1_Y195-93 (1015) -----
  BrTTG1 (1015) -----
  BoTTG1-1 (1784) AAGCACATTCTGGTTTCTTTGATTGCAATGCCTCTATGCATCTATGTGATCGTAACTAA
  BoTTG1-2 (1015) -----

  AtTTG1 (1027) -----
  BnTTG1-1 (1377) -----
  BnTTG1-2 (1327) -----
  BnTTG1.1 (1015) -----
  BnTTG1.2 (1015) -----
  BrTTG1_P8 (1015) -----
  BrTTG1_Tsuda (1015) -----
  BrTTG1_Y195-93 (1015) -----
  BrTTG1 (1015) -----
  BoTTG1-1 (1844) GACTTTATTGCTTGGTGTACCAAATGCTCTACTATTTAATCTCTGTTTGTGTATAAAC
  BoTTG1-2 (1015) -----

  AtTTG1 (1027) -----
  BnTTG1-1 (1377) -----
  BnTTG1-2 (1327) -----
  BnTTG1.1 (1015) -----
  BnTTG1.2 (1015) -----
  BrTTG1_P8 (1015) -----
  BrTTG1_Tsuda (1015) -----
  BrTTG1_Y195-93 (1015) -----
  BrTTG1 (1015) -----

```



BoTTG1-1 (1904) CAAACCAGGATAATAATGTTATTGCGGTGGTTTCTGGTGTGGATTGTAGTTGGAGTA  
 BoTTG1-2 (1015) -----  
  
 AtTTG1 (1027) -----  
 BnTTG1-1 (1377) -----  
 BnTTG1-2 (1327) -----  
 BnTTG1.1 (1015) -----  
 BnTTG1.2 (1015) -----  
 BrTTG1\_P8 (1015) -----  
 BrTTG1\_Tsuda (1015) -----  
 BrTTG1\_Y195-93 (1015) -----  
 BrTTG1 (1015) -----  
 BoTTG1-1 (1964) AAATGGCATCTACTTGTTCATGGGTTACTTAGTTTCTAAACAAAAACAATTGTGTAAGATT  
 BoTTG1-2 (1015) -----  
  
 AtTTG1 (1027) -----  
 BnTTG1-1 (1377) -----  
 BnTTG1-2 (1327) -----  
 BnTTG1.1 (1015) -----  
 BnTTG1.2 (1015) -----  
 BrTTG1\_P8 (1015) -----  
 BrTTG1\_Tsuda (1015) -----  
 BrTTG1\_Y195-93 (1015) -----  
 BrTTG1 (1015) -----  
 BoTTG1-1 (2024) AGATAGATTACAGGTTCCAACCTT TAGGCACACATGAAAATAACTTCAAATGAAAAACA  
 BoTTG1-2 (1015) -----  
  
 AtTTG1 (1027) -----  
 BnTTG1-1 (1377) -----  
 BnTTG1-2 (1327) -----  
 BnTTG1.1 (1015) -----  
 BnTTG1.2 (1015) -----  
 BrTTG1\_P8 (1015) -----  
 BrTTG1\_Tsuda (1015) -----  
 BrTTG1\_Y195-93 (1015) -----  
 BrTTG1 (1015) -----  
 BoTTG1-1 (2084) AATCATCTGACTCCACCTTTTGGTATTACATTTGTTGCACTTTCATTTCTTTTACCT  
 BoTTG1-2 (1015) -----  
  
 AtTTG1 (1027) -----  
 BnTTG1-1 (1377) -----  
 BnTTG1-2 (1327) -----  
 BnTTG1.1 (1015) -----  
 BnTTG1.2 (1015) -----  
 BrTTG1\_P8 (1015) -----  
 BrTTG1\_Tsuda (1015) -----  
 BrTTG1\_Y195-93 (1015) -----  
 BrTTG1 (1015) -----  
 BoTTG1-1 (2144) CAAAAAGTAGAACAGAATAATCTACAAAGAGTCGTTTGGCTTCTTCTTTTATGTACATGG  
 BoTTG1-2 (1015) -----  
  
 AtTTG1 (1027) -----  
 BnTTG1-1 (1377) -----  
 BnTTG1-2 (1327) -----  
 BnTTG1.1 (1015) -----  
 BnTTG1.2 (1015) -----  
 BrTTG1\_P8 (1015) -----  
 BrTTG1\_Tsuda (1015) -----  
 BrTTG1\_Y195-93 (1015) -----  
 BrTTG1 (1015) -----  
 BoTTG1-1 (2204) TTCCCTGAACTCGATAACAAATTAAGAATCGTTACCTCAGTCCAGTTCTTTATCAAAT  
 BoTTG1-2 (1015) -----

AtTTG1 (1027) -----  
BnTTG1-1 (1377) -----  
BnTTG1-2 (1327) -----  
BnTTG1.1 (1015) -----  
BnTTG1.2 (1015) -----  
BrTTG1\_P8 (1015) -----  
BrTTG1\_Tsuda (1015) -----  
BrTTG1\_Y195-93 (1015) -----  
BrTTG1 (1015) -----  
BoTTG1-1 (2264) TCATCACAAGATATATATACTTGATGTTAAAAGTGGAAAATGATTCTAAATGATATTGTA  
BoTTG1-2 (1015) -----

AtTTG1 (1027) -----  
BnTTG1-1 (1377) -----  
BnTTG1-2 (1327) -----  
BnTTG1.1 (1015) -----  
BnTTG1.2 (1015) -----  
BrTTG1\_P8 (1015) -----  
BrTTG1\_Tsuda (1015) -----  
BrTTG1\_Y195-93 (1015) -----  
BrTTG1 (1015) -----  
BoTTG1-1 (2324) CCATCTATGATACAATATAACGTACGAATGGTAGAAGTACGTGAAATAGTTTAGTCTTGA  
BoTTG1-2 (1015) -----

AtTTG1 (1027) -----  
BnTTG1-1 (1377) -----  
BnTTG1-2 (1327) -----  
BnTTG1.1 (1015) -----  
BnTTG1.2 (1015) -----  
BrTTG1\_P8 (1015) -----  
BrTTG1\_Tsuda (1015) -----  
BrTTG1\_Y195-93 (1015) -----  
BrTTG1 (1015) -----  
BoTTG1-1 (2384) ACTCAAACCTCGAGTGTAAAGCTAACTTATCAGATTATGAAATCATTTTTTTCTTGAAGTA  
BoTTG1-2 (1015) -----

AtTTG1 (1027) -----  
BnTTG1-1 (1377) -----  
BnTTG1-2 (1327) -----  
BnTTG1.1 (1015) -----  
BnTTG1.2 (1015) -----  
BrTTG1\_P8 (1015) -----  
BrTTG1\_Tsuda (1015) -----  
BrTTG1\_Y195-93 (1015) -----  
BrTTG1 (1015) -----  
BoTTG1-1 (2444) AGCATAATCCAAATTTGTTGCTAACATTAGCAGTTTGATGTGGAGCTGAAGCAAATGCCTT  
BoTTG1-2 (1015) -----

AtTTG1 (1027) -----  
BnTTG1-1 (1377) -----  
BnTTG1-2 (1327) -----  
BnTTG1.1 (1015) -----  
BnTTG1.2 (1015) -----  
BrTTG1\_P8 (1015) -----  
BrTTG1\_Tsuda (1015) -----  
BrTTG1\_Y195-93 (1015) -----  
BrTTG1 (1015) -----  
BoTTG1-1 (2504) GTATAAACCTTGTGGAAGACATTTGCTATAGCATTGTGCTCCGATACCATGTACAACAT  
BoTTG1-2 (1015) -----

AtTTG1 (1027) -----  
BnTTG1-1 (1377) -----  
BnTTG1-2 (1327) -----

BnTTG1.1 (1015) -----  
BnTTG1.2 (1015) -----  
BrTTG1\_P8 (1015) -----  
BrTTG1\_Tsuda (1015) -----  
BrTTG1\_Y195-93 (1015) -----  
BrTTG1 (1015) -----  
BoTTG1-1 (2564) AAAGCTAATGTGTTCAAACCTTTAACTGGCAAAGCTTGCTAAGATTATATGTTTTCGTCAAA  
BoTTG1-2 (1015) -----

AtTTG1 (1027) -----  
BnTTG1-1 (1377) -----  
BnTTG1-2 (1327) -----  
BnTTG1.1 (1015) -----  
BnTTG1.2 (1015) -----  
BrTTG1\_P8 (1015) -----  
BrTTG1\_Tsuda (1015) -----  
BrTTG1\_Y195-93 (1015) -----  
BrTTG1 (1015) -----  
BoTTG1-1 (2624) ATCAAGTTCGGAACCCACTAGCCAGAGAGAAATAGTTAAAGCGATTACAAGTTTTAAAAA  
BoTTG1-2 (1015) -----

AtTTG1 (1027) -----  
BnTTG1-1 (1377) -----  
BnTTG1-2 (1327) -----  
BnTTG1.1 (1015) -----  
BnTTG1.2 (1015) -----  
BrTTG1\_P8 (1015) -----  
BrTTG1\_Tsuda (1015) -----  
BrTTG1\_Y195-93 (1015) -----  
BrTTG1 (1015) -----  
BoTTG1-1 (2684) CCTAAATTAGGGAAGTCACACTAAAAATCTTTACAAAAGCGAAAATCACAATGTTTATCT  
BoTTG1-2 (1015) -----

AtTTG1 (1027) -----  
BnTTG1-1 (1377) -----  
BnTTG1-2 (1327) -----  
BnTTG1.1 (1015) -----  
BnTTG1.2 (1015) -----  
BrTTG1\_P8 (1015) -----  
BrTTG1\_Tsuda (1015) -----  
BrTTG1\_Y195-93 (1015) -----  
BrTTG1 (1015) -----  
BoTTG1-1 (2744) ACAAAAATATATTCGCCATATGTTGGGTATGAAATAAACCGTTTTTCCTTATGCTGACATA  
BoTTG1-2 (1015) -----

AtTTG1 (1027) -----  
BnTTG1-1 (1377) -----  
BnTTG1-2 (1327) -----  
BnTTG1.1 (1015) -----  
BnTTG1.2 (1015) -----  
BrTTG1\_P8 (1015) -----  
BrTTG1\_Tsuda (1015) -----  
BrTTG1\_Y195-93 (1015) -----  
BrTTG1 (1015) -----  
BoTTG1-1 (2804) TGCAAATGGGAATGATGTGTATTTGTGAAGCGAACCCTTTTTCCTTTCCACATATACAAA  
BoTTG1-2 (1015) -----

AtTTG1 (1027) -----  
BnTTG1-1 (1377) -----  
BnTTG1-2 (1327) -----  
BnTTG1.1 (1015) -----  
BnTTG1.2 (1015) -----  
BrTTG1\_P8 (1015) -----

```

BrTTG1_Tsuda (1015) -----
BrTTG1_Y195-93 (1015) -----
  BrTTG1 (1015) -----
  BoTTG1-1 (2864) TTGTTCCCTCCTACTTTCATATGTGTAAACCACGATCCTTTTTTAGTTTTTTTAACT
  BoTTG1-2 (1015) -----

  AtTTG1 (1027) -----
  BnTTG1-1 (1377) -----
  BnTTG1-2 (1327) -----
  BnTTG1.1 (1015) -----
  BnTTG1.2 (1015) -----
  BrTTG1_P8 (1015) -----
  BrTTG1_Tsuda (1015) -----
  BrTTG1_Y195-93 (1015) -----
    BrTTG1 (1015) -----
    BoTTG1-1 (2924) CATTATTACGATGTTACAATTATGATATAGGAAAGATTACATAGACGATTGACAAACCG
    BoTTG1-2 (1015) -----

    AtTTG1 (1027) -----
    BnTTG1-1 (1377) -----
    BnTTG1-2 (1327) -----
    BnTTG1.1 (1015) -----
    BnTTG1.2 (1015) -----
    BrTTG1_P8 (1015) -----
    BrTTG1_Tsuda (1015) -----
    BrTTG1_Y195-93 (1015) -----
      BrTTG1 (1015) -----
      BoTTG1-1 (2984) ACAATACTACCTGCCTTATGAAGACCTACGCCTAACTGCATCATCTGAGCCGTCCTATGA
      BoTTG1-2 (1015) -----

      AtTTG1 (1027) -----
      BnTTG1-1 (1377) -----
      BnTTG1-2 (1327) -----
      BnTTG1.1 (1015) -----
      BnTTG1.2 (1015) -----
      BrTTG1_P8 (1015) -----
      BrTTG1_Tsuda (1015) -----
      BrTTG1_Y195-93 (1015) -----
        BrTTG1 (1015) -----
        BoTTG1-1 (3044) AGATCCACGCCTGATCAGATTTACTTGCACCATGTTGAAGATCCCTTGCAAGTCTTCTCT
        BoTTG1-2 (1015) -----

        AtTTG1 (1027) -----
        BnTTG1-1 (1377) -----
        BnTTG1-2 (1327) -----
        BnTTG1.1 (1015) -----
        BnTTG1.2 (1015) -----
        BrTTG1_P8 (1015) -----
        BrTTG1_Tsuda (1015) -----
        BrTTG1_Y195-93 (1015) -----
          BrTTG1 (1015) -----
          BoTTG1-1 (3104) CTGTAGTCTCCATAATTGTTTAATAAACCGCTCACTCCGGACTTGAACCTGGATTTCTCT
          BoTTG1-2 (1015) -----

          AtTTG1 (1027) -----
          BnTTG1-1 (1377) -----
          BnTTG1-2 (1327) -----
          BnTTG1.1 (1015) -----
          BnTTG1.2 (1015) -----
          BrTTG1_P8 (1015) -----
          BrTTG1_Tsuda (1015) -----
          BrTTG1_Y195-93 (1015) -----
            BrTTG1 (1015) -----

```

```

BoTTG1-1 (3164) GCAATCTGCAATAAATTGCATAGTCTGGGATTCGAACCCAGACCTGGGTGTAGATGCCT
BoTTG1-2 (1015) -----

    AtTTG1 (1027) -----
    BnTTG1-1 (1377) -----
    BnTTG1-2 (1327) -----
    BnTTG1.1 (1015) -----
    BnTTG1.2 (1015) -----
    BrTTG1_P8 (1015) -----
    BrTTG1_Tsuda (1015) -----
BrTTG1_Y195-93 (1015) -----
    BrTTG1 (1015) -----
    BoTTG1-1 (3224) TTAAACTTTAACCAATAGGCTACGGTGCTTCCACAAAATCCTTTTTTAGTTAAACTGTGA
    BoTTG1-2 (1015) -----

    AtTTG1 (1027) -----
    BnTTG1-1 (1377) -----
    BnTTG1-2 (1327) -----
    BnTTG1.1 (1015) -----
    BnTTG1.2 (1015) -----
    BrTTG1_P8 (1015) -----
    BrTTG1_Tsuda (1015) -----
BrTTG1_Y195-93 (1015) -----
    BrTTG1 (1015) -----
    BoTTG1-1 (3284) TTTTAATTGGGCATCTTTGGTAGTTTCTAAAGTAGTGTCAAATAAATACTTACTGTAAGA
    BoTTG1-2 (1015) -----

    AtTTG1 (1027) -----
    BnTTG1-1 (1377) -----
    BnTTG1-2 (1327) -----
    BnTTG1.1 (1015) -----
    BnTTG1.2 (1015) -----
    BrTTG1_P8 (1015) -----
    BrTTG1_Tsuda (1015) -----
BrTTG1_Y195-93 (1015) -----
    BrTTG1 (1015) -----
    BoTTG1-1 (3344) GTTTGTGTTCTTGATTATTCTTTTTTTGTCAAGTATAAAGTAAAAGATTCTTGTATTA
    BoTTG1-2 (1015) -----

    AtTTG1 (1027) -----
    BnTTG1-1 (1377) -----
    BnTTG1-2 (1327) -----
    BnTTG1.1 (1015) -----
    BnTTG1.2 (1015) -----
    BrTTG1_P8 (1015) -----
    BrTTG1_Tsuda (1015) -----
BrTTG1_Y195-93 (1015) -----
    BrTTG1 (1015) -----
    BoTTG1-1 (3404) GTCTTCCAGTTAGTATTCTTTTTTAATATTGTGAAAAGCATAGACTTATAAAAGTACA
    BoTTG1-2 (1015) -----

    AtTTG1 (1027) -----
    BnTTG1-1 (1377) -----
    BnTTG1-2 (1327) -----
    BnTTG1.1 (1015) -----
    BnTTG1.2 (1015) -----
    BrTTG1_P8 (1015) -----
    BrTTG1_Tsuda (1015) -----
BrTTG1_Y195-93 (1015) -----
    BrTTG1 (1015) -----
    BoTTG1-1 (3464) CATGTAAAGCTACATTTAATCTATGTGGAAGCATTTTTTGGAAGTCCTAGGATCCTATAA
    BoTTG1-2 (1015) -----

```

AtTTG1 (1027) -----  
 BnTTG1-1 (1377) -----  
 BnTTG1-2 (1327) -----  
 BnTTG1.1 (1015) -----  
 BnTTG1.2 (1015) -----  
 BrTTG1\_P8 (1015) -----  
 BrTTG1\_Tsuda (1015) -----  
 BrTTG1\_Y195-93 (1015) -----  
 BrTTG1 (1015) -----  
 BoTTG1-1 (3524) CTCATTTTATTGAGTTTACACACAGAACTCAACAGTT  
 BoTTG1-2 (1015) -----

#### 14. BnTT2

AtTT2 (1) -----  
 BnTT2-1 (1) AATCTATTCTCAACACAACGCTAAAGACAAGTCTACCAACCACACAACAACAAGAGAGAT  
 BnTT2-2 (1) AATCTATTCTCAACACAACGCTAAAGACAAGTCTACCAACCACACAACAACAAGAGAGAT  
 BnTT2-3 (1) AATCTATTCTCAACACAACGCTAAAGACAAGTCTACCAACCACACAACAACAAGAGAGAT  
 BrTT2 (1) -----AT  
 BoTT2 (1) -----

AtTT2 (1) -ATGGAAAGAGAGCAACTACTAGTGTGAGGAGAGAAGAGTTAAACAGAGGAGCTTGGAC  
 BnTT2-1 (61) GATGAGAAAGAGAGAAAAGTAGTAAGGTGAAGAAAGAGGAGTTAAACAGAGGAGCTTGGAC  
 BnTT2-2 (61) GATGAGAAAGAGAGAAAAGTAGTAGGGTGAAGAAAGAGGAGTTAAACAGAGGAGCTTGGAC  
 BnTT2-3 (61) GATGAGAAAGAGAGAAAAGTAGTAAGGTGAAGAAAGAGGAGTTAAACAGAGGGGCTTGGAC  
 BrTT2 (3) GATGAGAAAGAGAGAAAAGTAGTAAGGTGAAGAAAGAGGAGTTAAACAGAGGAGCTTGGAC  
 BoTT2 (1) -ATGAGAAAGAGAGAAAAGTAGTAGGGTGAAGAAAGAGGAGTTAAACAGAGGAGCTTGGAC

AtTT2 (60) TGATCATGAAGACAAGATCCTTAGAGATTACATCACCACTCACGGCGAAGGCAAATGGAG  
 BnTT2-1 (121) CGATCAAGAAGACAAGATCCTTAAAGACTATATCATGTTCCACGGCGAAGGAAAAATGGAG  
 BnTT2-2 (121) CGATCAAGAAGACAAGATCCTTAAAGACTATATCATGTTCCACGGCGAAGGAAAAATGGAG  
 BnTT2-3 (121) CGATCAAGAAGACAAGATCCTTAAAGACTATATCATGTTCCACGGCGAAGGAAAAATGGAG  
 BrTT2 (63) CGATCAAGAAGACAAGATCCTTAAAGACTATATCATGTTCCACGGCGAAGGAAAAATGGAG  
 BoTT2 (60) CGATCAAGAAGACAAGATCCTTAAAGACTATATCATGTTCCACGGCGAAGGAAAAATGGAG

AtTT2 (120) CACTCTCCCTAACCAAGCTGGTCTCAAGAGGTGTGGCAAAGCTGTAGACTTCGGTGGAA  
 BnTT2-1 (181) CACACTCCCAAACCAAGCTGGTCTCAAGAGGTGTGGCAAAGCTGCAGACTTCGGTGGAA  
 BnTT2-2 (181) CACACTCCCAAACCAAGCTGGTCTCAAGAGGTGTGGCAAAGCTGCAGACTTCGGTGGAA  
 BnTT2-3 (181) CACACTCCCAAACCAAGCTGGTCTCAAGAGGTGTGGCAAAGCTGCAGACTTCGGTGGAA  
 BrTT2 (123) CACACTCCCAAACCAAGCTGGTCTCAAGAGGTGTGGCAAAGCTGCAGACTTCGGTGGAA  
 BoTT2 (120) CACACTCCCAAACCAAGCTGGTCTCAAGAGGTGTGGCAAAGCTGCAGACTTCGGTGGAA

AtTT2 (180) GAACTACTTAAGACCGGGGATAAAGCGCGGTAACATCTCATCTGATGAAGAAGAACTTAT  
 BnTT2-1 (241) GAACTACTTGAGACCAGGCATAAAGCGCGGAAACATCTCATCTGATGAAGAAGAACTTAT  
 BnTT2-2 (241) GAACTACTTGAGACCAGGCATAAAGCGCGGAAACATCTCATCTGATGAAGAAGAACTTAT  
 BnTT2-3 (241) GAACTACTTGAGACCAGGCATAAAGCGCGGAAACATCTCATCTGATGAAGAAGAACTTAT  
 BrTT2 (183) GAACTACTTGAGACCAGGCATAAAGCGCGGAAACATCTCATCTGATGAAGAAGAACTTAT  
 BoTT2 (180) GAACTACTTGAGACCAGGCATAAAGCGCGGAAACATCTCATCTGATGAAGAAGAACTTAT

AtTT2 (240) AATCCGCTCCATAATCTCTTGGAAACAGATGGTCGTTGATAGCTGGGAGGCTTCCAGG  
 BnTT2-1 (301) AATCCGCTCCATAATCTCCTTGGAAACAGATGGTCGTTGATAGCTGGGAGGCTTCCAGG  
 BnTT2-2 (301) AATCCGCTCCATAATCTCCTTGGAAACAGATGGTCGTTGATAGCTGGGAGGCTTCCAGG  
 BnTT2-3 (301) AATCCGCTCCATAATCTCCTTGGAAACAGATGGTCGTTGATAGCTGGGAGGCTTCCAGG  
 BrTT2 (243) AATCCGCTCCATAATCTCTTGGAAACAGATGGTCGTTGATAGCTGGGAGGCTTCCAGG  
 BoTT2 (240) AATCCGCTCCATAATCTCTTGGAAACAGATGGTCGTTGATAGCTGGGAGGCTTCCAGG

AtTT2 (300) CCGAACAGACAATGAAATAAAGAATCATTGGAACCTCAAACCTCCGCAAAGACTTCCAAA  
 BnTT2-1 (361) GCGAACAGACAATGAAATAAAGAACCCTGGAACCTCAAACCTCCGCAAAGACTTCCAAA  
 BnTT2-2 (361) GCGAACAGACAATGAAATAAAGAACCCTGGAACCTCAAACCTCCGCAAAGACTTCCAAA  
 BnTT2-3 (361) GCGAACAGACAATGAAATAAAGAACCCTGGAACCTCAAACCTCCGCAAAGACTTCCAAA  
 BrTT2 (303) GCGAACAGACAATGAAATAAAGAACCCTGGAACCTCAAACCTCCGCAAAGACTTCCAAA  
 BoTT2 (300) GCGAACAGACAATGAAATAAAGAACCCTGGAACCTCAAACCTCCGCAAAGACTTCCAAA

AtTT2 (360) AACTCAAACCAAGCAACCAAACGTATAAAACATTGACGAACAACGA---GAATAATGT

BnTT2-1 (421) ATCTCAAACCAACCAACAGAAAAGTCGAAAACATTCCAACAACAACAACATGAATAAAGT  
 BnTT2-2 (421) ATCACAACCAACCAACAGAAAAGTCGAAAACATTCCAACAACAACAACATGAATAAAGT  
 BnTT2-3 (421) ATCTCAAACCAACCAACAGAAAAGTCGAAAACATTCCAACAACAACAACATGAATAAAGT  
 BrTT2 (363) ATCTCAAACCAACCAACAGAAAAGTCGAAAACATTCCAACAACAACAACATGAATAAAGT  
 BoTT2 (360) ATCACAACCAACCAACAGAAAAGTCGAAAACATTCCAACAACAACAACATGAATAAAGT

AtTT2 (417) ATGTGTTATACGTACAAAGGCGATTAGGTGCTCAAAGACTCTTCTCTTCTCGGATCTCTC  
 BnTT2-1 (481) ATGTGTTATACGTCAAAGGCGATTAGGTCCCAAAGGCTCTGACATTTTCCAGAAATCAGAG  
 BnTT2-2 (481) ATCTGTTATACGTCAAAGGCGATTAGGTGCCCAAAGGCTCTGACATTTTCCAGAAATCAGAG  
 BnTT2-3 (481) ATGTGTTATACGTCAAAGGCGATTAGGTCCCAAAGGCTCTGACATTTTCCAGAAATCAGAG  
 BrTT2 (423) ATGTGTTATACGTCAAAGGCGATTAGGTCCCAAAGGCTCTGACATTTTCCAGAAATCAGAG  
 BoTT2 (420) ATCTGTTATACGTCAAAGGCGATTAGGTGCCCAAAGGCTCTGACATTTTCCAGAAATCAGAG

AtTT2 (477) TCTTCAGAAGAAGAGTAGTACTAGTCCACTACCTCTGAAAGAACAAGAGATGGATC---A  
 BnTT2-1 (541) TAGT-----ATTGGTAGTACCAGTCTTCTTACTGTGAAGGAAAACGTGATTGATCATCA  
 BnTT2-2 (541) TAGT-----ATTGGTAGTACCAGTCTTCTTACTGTGAAGGAAAACGTGATTGATCAACA  
 BnTT2-3 (541) TAGT-----ATTGGTAGTACCAGTCTTCTTACTGTGAAGGAAAACGTGATTGATCATCA  
 BrTT2 (483) TAGT-----ATTGGTAGTACCAGTCTTCTTACTGTGAAGGAAAACGTGATTGATCATCA  
 BoTT2 (480) TAGT-----ATTGGTAGTACCAGTCTTCTTACTGTGAAGGAAAACGTGATTGATCAACA

AtTT2 (534) AGGTGGATCT---TCGTTGATGGGAGATCTCGAATTCGATTTTCGATAGGATCCATTCGGG  
 BnTT2-1 (595) AGCTGGTTCTCCTTCGTTGTTGGGAGATCTTAAAAATCGATTTTGATAAAAATTCAGTCTGA  
 BnTT2-2 (595) AGCTAGTTCTCCTTCATCGTTGGGAGATCTTAAAAATCGATTTTGATAAAAATTCAGTCTGA  
 BnTT2-3 (595) AGCTGGTTCTCCTTCGTTGTTGGGAGATCTTAAAAATCGATTTTGATAAAAATTCAGTCTGA  
 BrTT2 (537) AGCTGGTTCTCCTTCATTTGTTGGGAGATCTTAAAAATCGATTTTGATAAAAATTCAGTCTGA  
 BoTT2 (534) AGCTAGTTCTCCTTCATCGTTGGGAGATCTTAAAAATCGATTTTGATAAAAATTCAGTCTGA

AtTT2 (591) GTTTCACTTCCCGGATTTGATGGATTTTGATGGTTTGGACTGTGGAACGTTACATCTCT  
 BnTT2-1 (655) GTATCTTCTCTGATTTGATGGACTTTGATGGTTTGGGTTGTGGAACGTAATGTCTCT  
 BnTT2-2 (655) GTATCTTCTCTGATCTGATGGACTTTGATGGTTTGGGTTGTGGAACGTAATGTCTCT  
 BnTT2-3 (655) GTATCTTCTCTGATTTAATGGCTTTGATGGTTTGGGTTGTGGAACGTAATGTCTCT  
 BrTT2 (597) GTATCTTCTCTGATTTGATGGACTTTGATGGTTTGGGTTGTGGAACGTAATGTCTCT  
 BoTT2 (594) GTATCTTCTCTGATCTGATGGACTTTGATGGTTTGGGTTGTGGAACGTAATGTCTCT

AtTT2 (651) TGTTTCATCTAACGAGATTTTGGGAGAGTTGGTTCCTGCTCAA-----GGTAA  
 BnTT2-1 (715) TGTTTCATCTGACGAGGTGCTAGGAGATTATGTTTCGACTGATACTTCTTGTCTGGGTAA  
 BnTT2-2 (715) TGTTTCATCTGACGAGGTGCTGGGAGATTATGTTTCGGCTGATGCTTCTTGTCTGGGTAA  
 BnTT2-3 (715) TGTTTCATCTGACGAGGTGCTAGGAGATTATGTTTCGGCTGATGCTTCTTGTCTGGGTAA  
 BrTT2 (657) TGTTTCATCTGACGAGGTGCTGGGAGATTATGTTTCGGCTGATACTTCTTGTCTGGGTAA  
 BoTT2 (654) TGTTTCATCTGACGAGGTGCTGGGAGATTATGTTTCGGCTGATGCTTCTTGTCTGGGTAA

AtTT2 (699) TCTCGATCTCAATAGACCTTTCACCTCTTGTGTCATCATCGTGGCGACGATGAAGATTGGCT  
 BnTT2-1 (775) TCTTGATCTTAATAGACCTTTCACCTCTTGTGCTTCAA-----GAAGATTGTCT  
 BnTT2-2 (775) TCTTGATCTTAATAGACCTTTCACCTCTTGTGCTTCAA-----GAAGATTGTCT  
 BnTT2-3 (775) TCTTGATCTTAATAGACCTTTCACCTCTTGTGCTTCAA-----GAAGATTGTCT  
 BrTT2 (717) TCTTGATCTTAATAGACCTTTCACCTCTTGTGCTTCAA-----GAAGATTGTCT  
 BoTT2 (714) TCTTGATCTTAATAGACCTTTCACCTCTTGTGCTTCAA-----GAAGATTGTCT

AtTT2 (759) CCGGACTTCACTTGTGA-----  
 BnTT2-1 (823) CTGGGACTTTAATTGTTAGACCCTATCATAAATCTTCATATATTACGTCTACCTCTGTAC  
 BnTT2-2 (823) CTGGGACTTTAATTGTTAGACCCTATCGTAAATCTTCATATATTACGTCTACCTCTGTAC  
 BnTT2-3 (823) CTGGGACTTTAATTGTTAGACCCTATCGTAAATCTTCATATATTACGTCTACCTCTGTAC  
 BrTT2 (765) CTGGGACTTTAATTGTTAG-----  
 BoTT2 (762) CTGGGACTTTAATTGTTAG-----

AtTT2 (778) -----  
 BnTT2-1 (883) GAACAAAAGTATATATTTATATTTTGTGTTGAACGCTTCTAATTACAAGTAATATCTAAAA  
 BnTT2-2 (883) GAACAAAAGTATATATTTATATTTTGTGTTGAACGCTTCTAATTACAAGTAATATCT----  
 BnTT2-3 (883) GAACAAAAGTATATATTTATATTTTGTGTTGAACGCTTCTAATTACAAGTAATATCT----  
 BrTT2 (784) -----  
 BoTT2 (781) -----

AtTT2 (778) -----

BnTT2-1 (943) AAAAAAAAAAAAAA  
 BnTT2-2 (939) -----  
 BnTT2-3 (939) -----  
 BrTT2 (784) -----  
 BoTT2 (781) -----

**15. BnTTG2**

AtTTG2-1 (1) -----  
 AtTTG2-2 (1) -----  
 BnWRKY44 (1) ACGACCGATACATCAACGAGCCACAACCCAAAAACCCGGGTTCCGGATCAGCCCCGGATCT  
 BrTTG2-1 (1) -----  
 BrTTG2-2 (1) -----  
 BoTTG2-1 (1) -----  
 BoTTG2-2 (1) -----

AtTTG2-1 (1) -----  
 AtTTG2-2 (1) -----  
 BnWRKY44 (61) CTTCTAACTCCTTTACAAAGGCTCCTTTCTTCAAATCGTTTTTCAGAACTTCAGATCTCT  
 BrTTG2-1 (1) -----  
 BrTTG2-2 (1) -----  
 BoTTG2-1 (1) -----  
 BoTTG2-2 (1) -----

AtTTG2-1 (1) -----ATGGAGGTGAATGATGGTGAAAGAGTGGTAAT  
 AtTTG2-2 (1) -----  
 BnWRKY44 (121) CTCACCGTTGACGACTATAATGGAGGTGAAAGAGAGTAAAAGAGTGGTAATAGCAAAACC  
 BrTTG2-1 (1) -----ATGGATGTGAAAGAGAGTGAAAGAAAAGGTAGTAGCAAAACC  
 BrTTG2-2 (1) -----ATGGAGGTGAAAGAGAGTAAGAGAGTGGTAATAGCAAAACC  
 BoTTG2-1 (1) -----ATGGAGGTGAAAGAGAGTAAAAGAGTGGTAATAGCAAAACC  
 BoTTG2-2 (1) -----ATGGATGTGAAAGAGAGTGAAAGAAAAGCTAATAGTAAAACC

AtTTG2-1 (33) AGCAAAACCAGTTGCCTCAAGACCTTCTTCAAGTTCTGGCTTCAGGACATTCAGTACGCT  
 AtTTG2-2 (1) -----  
 BnWRKY44 (181) AGTTGCTTCAAGGCCTTCATTCTAGCATCAGGACATTCGCTAATCTTTAACTGATTC  
 BrTTG2-1 (42) AGTGGCTTCAAGGCCTTCATGCTCTAGCGTCAGGACATTCAGTACCTTCTGGCTGATTC  
 BrTTG2-2 (42) AGTTGCTTCAAGGCCTTCATTCTAGCATCAGGACATTCGCTAATCTTTAACTGATTC  
 BoTTG2-1 (42) AGTTGCTTCAAGGCCTTCATTCTAGCATCAGGACATTCGCTAATCTTTAACTGATTC  
 BoTTG2-2 (42) AGTGGCTTCAAGGCCTTCATGCTCTAGCGTCAGGACATTCAGTACCTTATGACTGATTC

AtTTG2-1 (93) TCTTACTGATTAGTTACCGTATCTCCGCAAACGACTTGCCACGAGATTGTAGACGCTGC  
 AtTTG2-2 (1) -----  
 BnWRKY44 (241) AGTTACCGTACCTCCTC-----ATGAGACTGTAGACGCTGCTATAAGACCAAA  
 BrTTG2-1 (102) AGTTACCGTCTCTCCACAATCGAACTGTCACGAGACTGTAGACGCTTCTATAATACCAAA  
 BrTTG2-2 (102) AGTTACCGTATCTCTCCC-----CATGAGACTGTAGACGCTGCTATAAGACCAAA  
 BoTTG2-1 (102) AGTTACCGTACCTCCTC-----ATGAGACTGTAGACGCTGCTATAAGACCAAA  
 BoTTG2-2 (102) AGTTACCGTCTCTCCACAATCGAACTGTCACGAGACTGTAGACGCTTCTATAAGACCAAA

AtTTG2-1 (153) TATAAGACCAAAGACTTTGAGATTCAATCAGCCAGTAGCAGCTTCGGTCTCATGTCCACG  
 AtTTG2-2 (1) -----  
 BnWRKY44 (289) GACTCTGAGGTTTTAAGCAACCAGCAGCAGCGGCAGC-----TTCGGTCTCATG  
 BrTTG2-1 (162) GACTGAGAGGTTTTAAACAGCCAGCTTCAGCT-----TCTGTCTCATC  
 BrTTG2-2 (153) GACTCTGAGGTTTTAAGCAACCAGCAGCGGCAGCAGC-----TTCGGTCTCATG  
 BoTTG2-1 (150) GACTCTGAGGTTTTAAGCAACCAGCAGCAGC-----TTCGGTCTCATG  
 BoTTG2-2 (162) GACTGAGAGGTTTTAAACAGCCAGCTTCAGCTTCAGCTTCAGCTTCAGCTTCTGTCTCATC

AtTTG2-1 (213) GGCTGAAGTAAAAGTATTGGAATGGAATGTCTTGTGATGATGATTCAGATAGCAGAAA  
 AtTTG2-2 (1) -----ATGTCTTGTGATGATGATTCAGATAGCAGAAA  
 BnWRKY44 (337) TCCACAGGTGGAAGGAAATGACAAAGGAAAGTCTTGCCTTGAT---TCAGATACCAAAAAG  
 BrTTG2-1 (204) TCCGCGGTGGAAGGAAATGACAAAGGAAAGTCTTGTGATGAT---TCAGAGAGCAAAAAG  
 BrTTG2-2 (201) TCCACAGGTGGAAGGAAATGACAAAGGAAAGTCTTGTGATGAT---TCAGATACCAAAAAG  
 BoTTG2-1 (192) TCCACAGGTGGAAGGAAATGACAAAGGAAAGTCTTGTGATGAT---TCAGATACCAAAAAG  
 BoTTG2-2 (222) TCCACGGGTGGAAGGAAAGTGGCAATGAAAATCTTGTGATGAT---TCAGAGAGCAAAA



AtTTG2-1 (273) CTACGTCGTTTATAAACCGAAAGCAAAGCTTGTCTCCAAAGCAACCGTCTCTGCATTGGC  
 AtTTG2-2 (33) CTACGTCGTTTATAAACCGAAAGCAAAGCTTGTCTCCAAAGCAACCGTCTCTGCATTGGC  
 BnWRKY44 (394) CTACGTTGTTTATAAACCTAAAGCAAAGCTTGTTCCCAAGCAACTGTCTCTGCATTGGC  
 BrTTG2-1 (261) TTACGTCATTTATAAACCTAAAGCAAAGCTTGTCTCCAAAGCAACCGTCTCTGCGTTGGC  
 BrTTG2-2 (258) CTATGTAGTTTATAAACCTAAAGCAAAGCTTGTCTCCAAAGCAACTGTCTCCGCATTGGC  
 BoTTG2-1 (249) CTATGTAGTTTATAAACCTAAAGCAAAGCTTGTCTCCAGGCAACCGTCTCCGCATTGGC  
 BoTTG2-2 (279) TTATGTCAATTTATAAACCTAAAGCAAAGCTTGTCTCCAAAGCAACCGTCTCTGCGTTGGC  
  
 AtTTG2-1 (333) TAATATGCTTCAGGGGAATCGTCAACAAACTTGGAGACAAAGCGAAGCAGTATCCTATGG  
 AtTTG2-2 (93) TAATATG-----GGGAATCGTCAACAAACTTGGAGACAAAGCGAAGCAGTATCCTATGG  
 BnWRKY44 (454) TAATATGCTTCAGGGTAATCAACAGGTTTGGAGACAAAGCGAAGCAGTACCGTATGG  
 BrTTG2-1 (321) TAATATGCTTCCAGGAAATGTCAACAGGCTTGGATAAAAAGAGAAAGCAGTAGCCTACGG  
 BrTTG2-2 (318) TAATATG-----GGTAATCACCACAGGTTTGGAGACAAAGCGAAGCAGTACCGTATGG  
 BoTTG2-1 (309) TAATATG-----GGTAATCATCAACAGGTTTGGAGACAAAGCGAATCAGTACCGTATGG  
 BoTTG2-2 (339) TAATATGA-----CTTGGATAAAAAGAGAAAGCAGTAGCCTATGG  
  
 AtTTG2-1 (393) GAAGAGTGTGAGCCAAGGTACACATCGAGCAGGTCTAATCTAGTCCAGAAAGTTCCATC  
 AtTTG2-2 (147) GAAGAGTGTGAGCCAAGGTACACATCGAGCAGGTCTAATCTAGTCCAGAAAGTTCCATC  
 BnWRKY44 (514) **GAAGAGTGTGAGCCAAGGTACAC**-----GCCCTAACCTAGTCCCTAGGGTTCCATC  
 BrTTG2-1 (381) GAAGCGTGTGAACCAAGGCACGCATCGAGCGGTTCTAACCCTAGTCCCAGAGTTCCAAC  
 BrTTG2-2 (372) GAAGAGTGTGAGCCAAGGTACAC-----GCCCTAACCTAGTCCCTAGGGTTCCATC  
 BoTTG2-1 (363) GAAGAGTGTGAGCCAAGG-----  
 BoTTG2-2 (378) GAAGCGTGTGAGCCAAGGCACACATCGAGCAGGTCTAACCCTAATCCCTAGAGTTCCAAC  
  
 AtTTG2-1 (453) TTTTACGGAATCAGAGACATCTACTGGGGATAGATCTTCTGTGGATGGATAACAATGGAG  
 AtTTG2-2 (207) TTTTACGGAATCAGAGACATCTACTGGGGATAGATCTTCTGTGGATGGATAACAATGGAG  
 BnWRKY44 (565) CTTTAAAGAATCAGAGACATCGGCTGGAGACAGATCTTACGTGGACGGATAACAATGGAG  
 BrTTG2-1 (441) CTTTAAAGAATCAGAGACATCCACTGGGGACAGATCTTACGTGGACGGATAACAATGGAG  
 BrTTG2-2 (423) CTTTAAAGAATCAGAGACATCGGCTGGAGACAGATCTTACGTGGACGGATAACAATGGAG  
 BoTTG2-1 (381) -----  
 BoTTG2-2 (438) CTTTAAAGAATCAGAGACATCCACTGGGGACAGATCTTACGTGGACGGATAACAATGGAG  
  
 AtTTG2-1 (513) GAAATACGGACAGAAGCAAGTTAAAGGAAGTGAGTGTCCAAGGAGTTATTACAAATGCAC  
 AtTTG2-2 (267) GAAATACGGACAGAAGCAAGTTAAAGGAAGTGAGTGTCCAAGGAGTTATTACAAATGCAC  
 BnWRKY44 (625) **GAAGTACGGACAGAAGCAAGT**CAAAGGAAGTGACTGTCCAAGGAGTTATTACAAATGCAC  
 BrTTG2-1 (501) GAAATACGGACAGAAGCAAGTTAAAGGAAGTGACTGTCCAAGGGGTTACTACAAATGCAC  
 BrTTG2-2 (483) GAAGTACGGACAGAAGCAAGTTAAAGGAAGTGACTGTCCAAGGAGTTACTACAAATGCAC  
 BoTTG2-1 (381) -----  
 BoTTG2-2 (498) GAAATACGGACAGAAGCAAGTTAAAGGAAGTGACTGTCCAAGGGGTTACTACAAATGCAC  
  
 AtTTG2-1 (573) ACACCCGAAATGTCCGGTGAAGAAGAAAGTAGAGAGATCA---GTGGAAGGTCAAGTTTC  
 AtTTG2-2 (327) ACACCCGAAATGTCCGGTGAAGAAGAAAGTAGAGAGATCA---GTGGAAGGTCAAGTTTC  
 BnWRKY44 (685) ACACCCGAAATGTCCGGTGAAGAAGAAAGTAGAGAGATCA---ATGGGTGGTCTGGTCTC  
 BrTTG2-1 (561) ACACCCGAAATGTCCGTGAAGAAGAGCGTAGAGAGATCATCAATGGGAGGTCTAGTTTC  
 BrTTG2-2 (543) ACACCCGAAATGTCCGGTGAAGAAGAAAGTAGAGAGATCA---ATGGGTGGTCTGGTCTC  
 BoTTG2-1 (381) -----  
 BoTTG2-2 (558) ACACCCGAAATGTCCGGTGAAGAAGAGAGTAGAGAGATCA---ATGGGAGGTCAAGTTTC  
  
 AtTTG2-1 (630) AGAGATTGTGTATCAAGGTGAACATAATCACTCAAAGCCATCTTGTCTCTTCCACGGCG  
 AtTTG2-2 (384) AGAGATTGTGTATCAAGGTGAACATAATCACTCAAAGCCATCTTGTCTCTTCCACGGCG  
 BnWRKY44 (742) AGAGATTGTGTATCAAGGTGAACATAATCACTCAAACCCTTGTCTCTTCCGCGCG  
 BrTTG2-1 (621) AGAGATTGTGTATCAAGGTGAGCATAATCACTCTAAACCCTTGTCTCTTCCGCGCG  
 BrTTG2-2 (600) AGAGATTGTGTATCAAGGTGAACATAATCACTCTAAACCCTTGTCTCTTCCGCGCG  
 BoTTG2-1 (381) -----  
 BoTTG2-2 (615) AGAGATTGTGTATCAAGGTGAGCATAATCACTCTAAACCCTTGTCTCTTCCGCGCG  
  
 AtTTG2-1 (690) TGCTTCATCATCAATCTCTTCAGGGTTTCAAAACCACCAAATCGATTGCTTCTGAAGG  
 AtTTG2-2 (444) TGCTTCATCATCAATCTCTTCAGGGTTTCAAAACCACCAAATCGATTGCTTCTGAAGG  
 BnWRKY44 (802) CGCTTCATCATCATCTCTTCAGGGTTTCAGAGACCACAAAGAGAGCTAGCTTCGGAAGG  
 BrTTG2-1 (681) GGCTTCATCTTCATCTCTTCAGGGTTTCAGACACCA-----TCTGAAGG  
 BrTTG2-2 (660) CGCTTCATCATCATCTCTTCAGGGTTTCAGAGACCACAAAGAGAGCTAGCTTCGGAAGG  
 BoTTG2-1 (381) -----G-----TTTCAGAGACCACAAAGAGAGCTAGCTTCGGAAGG  
 BoTTG2-2 (675) GGCTTCATCTTCATCTCTTCAGGGTTTCAGACACCA-----TCTGAAGG

AtTTG2-1 (750) ATCAATGGGACAAGACCCTAACAAATAATCTCTATTCTCCTCTATGGAACAATCAAAGCAA  
 AtTTG2-2 (504) ATCAATGGGACAAGACCCTAACAAATAATCTCTATTCTCCTCTATGGAACAATCAAAGCAA  
 BnWRKY44 (862) ATCAATAGGACAAGACCCTAGTAATGTTTATTACCATCCTCTTTGGAGCAATCAAAGCAA  
 BrTTG2-1 (726) ATCAATGGGGGAAGAACCTA-----ACCTCTTTGGAGTAATCAA-----  
 BrTTG2-2 (720) ATCAATAGGACAAGACTCTAGTAATGTTTGTTCATCCTCTTTGGAGCAATCAAAGCAA  
 BoTTG2-1 (417) ATCAATAGGACAAGACCCTAGTAATGTTTATTACCATCCTCTTTGGAGCAATCAAAGCAA  
 BoTTG2-2 (720) ATCAATGGGGGAAGAACCTA-----ACCTCTCTGGAGCAATCAA-----  
  
 AtTTG2-1 (810) TGACTCTACTCAAAACAGAACAGAGAAGATGAGTGAAGGTTGTGTTATTACACCATTTGA  
 AtTTG2-2 (564) TGACTCTACTCAAAACAGAACAGAGAAGATGAGTGAAGGTTGTGTTATTACACCATTTGA  
 BnWRKY44 (922) TGACTCATCTAAAAGCATAGCAGAGAAGATGAATGACGGTTGTGTAATAACACCATTCGA  
 BrTTG2-1 (766) -----GAGAAGATGAATGAAGGTTGTGTTATAACACCATTCGA  
 BrTTG2-2 (780) TGACTCATCTAAAAGCATAGCAGAGAAGATGAATGAGGTTGTGTAATAACACCATTCGA  
 BoTTG2-1 (477) TGACTCATCTAAAAGCATAGCAGAGAAGATGAATGAGGTTGTGTAATAACACCATTCGA  
 BoTTG2-2 (760) -----GAGAAGATGAATGAAGGTTGTGTTATAACACCATTCGA  
  
 AtTTG2-1 (870) GTTTGCTGTTCCAAGATCGACAAATCAAAATCCCGAACTTCAGATTCCGGTTGCAAGA-  
 AtTTG2-2 (624) GTTTGCTGTTCCAAGATCGACAAATCAAAATCCCGAACTTCAGATTCCGGTTGCAAGA-  
 BnWRKY44 (982) GTTTGCTGTTCCAAGATCAGCGAACTCTACTGGTGGGACTTCAGATTCTGGTTGTAGAAG  
 BrTTG2-1 (804) GTTCGCTGTTCCAAGAAGCAGCGAACTCAACTGGTGGAACTTCAGACTCCGGTTGTAGAAG-  
 BrTTG2-2 (840) GTTTGCTGTTCCAAGATCGCGAACTCGACTGGTGGGACTTCAGATTCTGGTTGTAGAAG  
 BoTTG2-1 (537) GTTTGCTGTTCCAAGATCAGCGAACTCTACTGGTGGGACTTCAGATTCTGGTTGTAGAAG  
 BoTTG2-2 (798) GTTTGCTGTTCCAAGAAGCAGCAAACTCAAGTGGTGGAACTTCGGATTCCGGTTGCAAGA-  
  
 AtTTG2-1 (929) --GTAGCCAATGTGATGAAGGAGAGCTTGATGATCCAAGCAGAAGCAAAGAAG---GAA  
 AtTTG2-2 (683) --GTAGCCAATGTGATGAAGGAGAGCTTGATGATCCAAGCAGAAGCAAAGAAG---GAA  
 BnWRKY44 (1042) TAGTAGCCAGTGTGATGAAGGAGAGCTTGATGATCCTAGCAGAAGCAAGAGAAG---GAA  
 BrTTG2-1 (863) --GTAGCCAGTGTGATGAAGGAGAGCTTGATGATCCAAGCAGAAGCAAGACAAGCATGAA  
 BrTTG2-2 (900) TAGTAGCCAGTGTGATGAAGGAGAGCTTGATGATCCTAGCAGAAGCAAGAGAAG---GAA  
 BoTTG2-1 (597) TTGTAGCCAGTGTGATGAAGGAGAGCTTGATGATCCTAGCAGAAGCAAGAGAAG---GAA  
 BoTTG2-2 (857) --GTAGCCAGTGTGATGAAGGAGAGCTTGATGATCCAAGCAGAAGCAAGACAAGCATGAA  
  
 AtTTG2-1 (984) GAACGAGAAGCAATCTAGTGAAGCAGGAGTATCGCAAGGCTCAGTGAATCAGACAGTCT  
 AtTTG2-2 (738) GAACGAGAAGCAATCTAGTGAAGCAGGAGTATCGCAAGGCTCAGTGAATCAGACAGTCT  
 BnWRKY44 (1099) GAACGAGAAGCAAGCAAGTCAAACAGGAGTATCACAAGCTCAGTGAATCAGACAGTCT  
 BrTTG2-1 (921) GAACGAGACGCAATCAAGTGAAGCTGGAGTATCGCAAAGCTCAGGGGAATCAGACAGTCT  
 BrTTG2-2 (957) GAACGAGAAGCAAGCAAGTCAAACAGGAGTATCACAAGCTCAGTGAATCAGACAGTCT  
 BoTTG2-1 (654) GAACGAGAAGCAAGCAAGTCAAACAGGAGTATCACAAGCTCAGTGAATCAGACAGTCT  
 BoTTG2-2 (915) GAACGAGAAGCAATCAAGTGTAGCTGGAGTATCCCAAAGCTCAGGGGAATCGACAGTCT  
  
 AtTTG2-1 (1044) TGAAGATGGATTAGGTGGAGAAAGTATGGACAAAAGTGGTAGGAGGCAATGCGTATCC  
 AtTTG2-2 (798) TGAAGATGGATTAGGTGGAGAAAGTATGGACAAAAGTGGTAGGAGGCAATGCGTATCC  
 BnWRKY44 (1159) TGAAGATGGATTAGGTGGAGAAAGTACGGTCAAAGTGGTTGGAGGCAATGCGTATCC  
 BrTTG2-1 (981) CGAAGATGGATTCAAGTGGAGAAAGTACGGACAGAAAGCGTTGGAGGGAATGCGTATCC  
 BrTTG2-2 (1017) TGAAGATGGATTAGGTGGAGAAAGTACGGTCAAAGTGGTTGGAGGCAATGCGTATCC  
 BoTTG2-1 (714) TGAAGATGGATTAGGTGGAGAAAGTACGGTCAAAGTGGTTGGAGGCAATGCGTATCC  
 BoTTG2-2 (975) CGAAGATGGATTCAAGTGGAGAAAGTACGGACAGAAAGCGTTGGAGGGAATGCGTATCC  
  
 AtTTG2-1 (1104) AAGAAGTTATTACAGATGCACAAGTCTAATTGCAGAGCAAGGAAACATGTTGAACGAGC  
 AtTTG2-2 (858) AAGAAGTTATTACAGATGCACAAGTCTAATTGCAGAGCAAGGAAACATGTTGAACGAGC  
 BnWRKY44 (1219) AAGAAGTTATTACAGATGCACAGTGCAAAAGTGCAGAGCTAGGAAACATGTTGAGAGAGC  
 BrTTG2-1 (1041) GAGAAGTTATTACAGTGCACGAGCTGAATTGTAGAGCAAGGAAACGCTGGAGAGAGC  
 BrTTG2-2 (1077) GAGAAGTTATTACAGATGCACGAGTGCAAAAGTGCAGAGCAAGGAAACATGTTGAGAGAGC  
 BoTTG2-1 (774) AAGAAGCTATTACAGATGCACGAGTGCAAAAGTGCAGAGCTAGGAAACATGTTGAGAGAGC  
 BoTTG2-2 (1035) GAGAAGTTACTACAGTGCACGAGCTGAATTGTAGAGCAAGGAAACGCTGGAGAGAGC  
  
 AtTTG2-1 (1164) GAGTGATGATCCAAGAGCTTTTCATTACAACCTACGAGGGTAAACATAATCAT---CATTT  
 AtTTG2-2 (918) GAGTGATGATCCAAGAGCTTTTCATTACAACCTACGAGGGTAAACATAATCAT---CATTT  
 BnWRKY44 (1279) GAGTGATGATCCAAGAGCTTTTCATTACAACCTATGAAGGTAAACACAATCA---CCATTT  
 BrTTG2-1 (1101) GAATGATGATCCAAGAGCTTTTCATTACAACCTACGAGGGTAAACACAATCATCACCATTT  
 BrTTG2-2 (1137) TAGTGATGATCCAAGAGCTTTTCATTACAACCTATGAAGGTAAACACAATCA---CCATTT  
 BoTTG2-1 (834) GAGTGATGATCCAAGAGCTTTTCATTACAACCTATGAAGGTAAACACAATCA---CCATTT

BoTTG2-2 (1095) GAGTGATGATTCAAGAGCTTTCATTACAACCTACGAAGGTAAACACAATCATCACCATTT  
 AtTTG2-1 (1221) GCTCTTGAGCCCTCCATCTTCCTCTACTCTTCCCTTTAACTCCCACAACTTTCTAAGCA  
 AtTTG2-2 (975) GCTCTTGAGCCCTCCATCTTCCTCTACTCTTCCCTTTAACTCCCACAACTTTCTAAGCA  
 BnWRKY44 (1336) GAACTTGAGACCTCCAACCTTCGCCTACTCTTCCCTTTACTCTACACAACATTCTAATCA  
 BrTTG2-1 (1161) GCAACTGAGGCCTCCAACCTTCTTCTACTCTTCCCTTTAGCTCCCACAACTTTCTAATCA  
 BrTTG2-2 (1194) GAACTTGAGACCTCCAACCTTCGCCTACTCTTCCCTTTACTCTACACAACATTCTAATCA  
 BoTTG2-1 (891) GAACTTGAGACCTCCAACCTTCGCCTACTCTTCCCTTTACTCTACACAACATTCTAATCA  
 BoTTG2-2 (1155) GCAACTGAGGCCTCCAACCTTCTTCTACTCTTCCCTTTAGCTCCCACAACTTTCTAATCA  
  
 AtTTG2-1 (1281) AACAAATTTGA-----  
 AtTTG2-2 (1035) AACAAATTTGA-----  
 BnWRKY44 (1396) AGCCATTTGATGAGTCCCATTTGATGCTTCTTCTTCTTCAATCTTCATAGCACATTTGAT  
 BrTTG2-1 (1221) AGCCATTTAA-----  
 BrTTG2-2 (1254) AGCCATTTGA-----  
 BoTTG2-1 (951) AGCCATTTGA-----  
 BoTTG2-2 (1215) AGCCATTTAA-----  
  
 AtTTG2-1 (1291) -----  
 AtTTG2-2 (1045) -----  
 BnWRKY44 (1456) TAATCAATCAATTTCTTGTTCCTTCCATTGTGAATTTATTTATTTTACATCAAAGTTGTAAG  
 BrTTG2-1 (1231) -----  
 BrTTG2-2 (1264) -----  
 BoTTG2-1 (961) -----  
 BoTTG2-2 (1225) -----  
  
 AtTTG2-1 (1291) -----  
 AtTTG2-2 (1045) -----  
 BnWRKY44 (1516) GACAAGAAGATAATTGTTATTTGACAAACAACAGAAAAAAAAAAAAAGCAAATAAAAAAGAG  
 BrTTG2-1 (1231) -----  
 BrTTG2-2 (1264) -----  
 BoTTG2-1 (961) -----  
 BoTTG2-2 (1225) -----  
  
 AtTTG2-1 (1291) -----  
 AtTTG2-2 (1045) -----  
 BnWRKY44 (1576) TGT'TTGATTTTAAAAAAAAAAAAAAAAAAAA  
 BrTTG2-1 (1231) -----  
 BrTTG2-2 (1264) -----  
 BoTTG2-1 (961) -----  
 BoTTG2-2 (1225) -----
